# Supplementary material for: A 2-hydroxybutyrate-mediated feedback loop regulates muscular fatigue
Source: eLife journal article supplement (doi:10.7554/elife.92707), 2023-11-24

# Figure 4C – C2C12 confirm overexpression of DDK-tagged hBCAT2

PageRuler™ Prestained Protein Ladder, 10 to 180 kDa

Precision Plus Protein Standard

Blot for BCAT2

Blot for DDK tag

50 kDa

75 kDa

DDK-tagged BCAT2

25 kDa

Area in figure

Area in figure

2HB - + - +  
Vector hBCAT2

2HB - + - +  
Vector hBCAT2

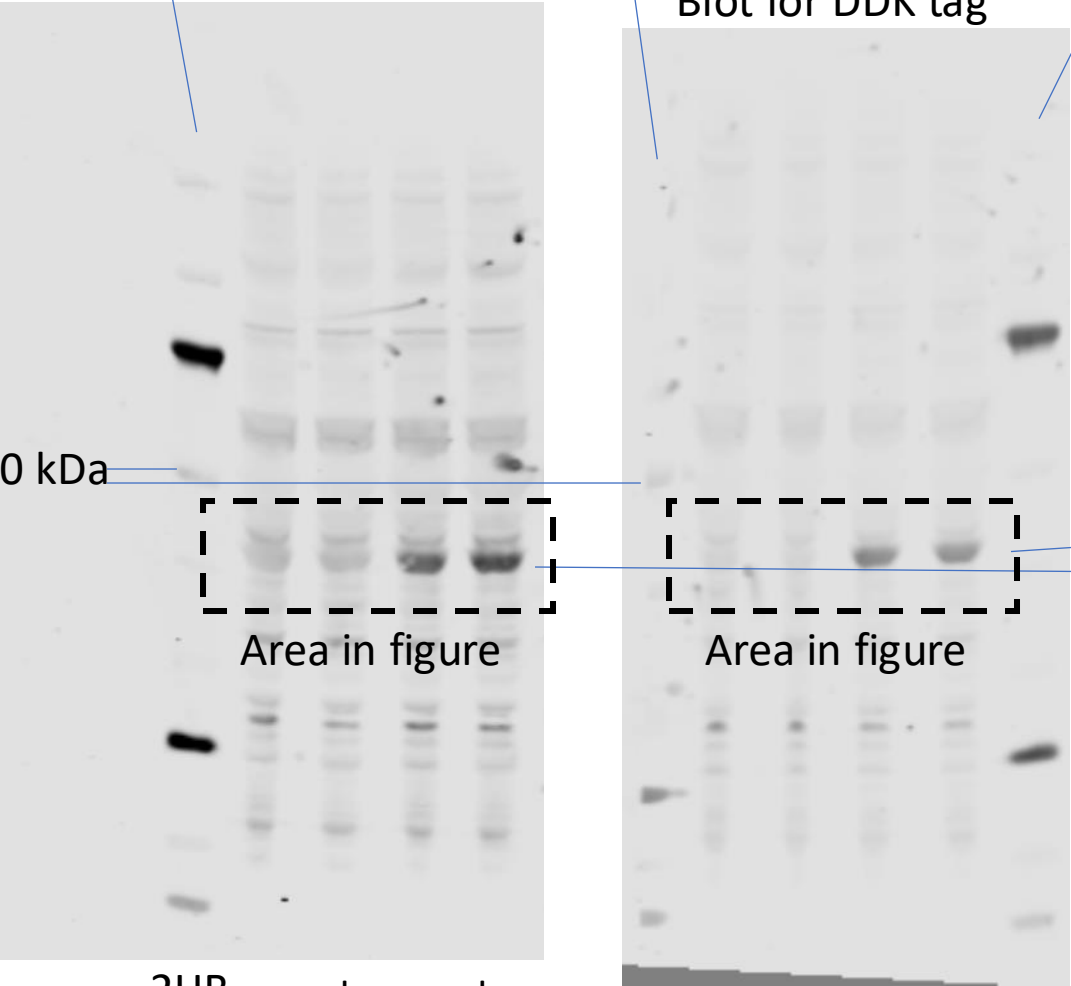

Figure 4E — C2C12 lysates transfected with siRNA against SIRT4 for non-targeting control, stained for total ADPr

PageRuler™ Prestained Protein Ladder, 10 to 180 kDa

Cytoplasmic extract

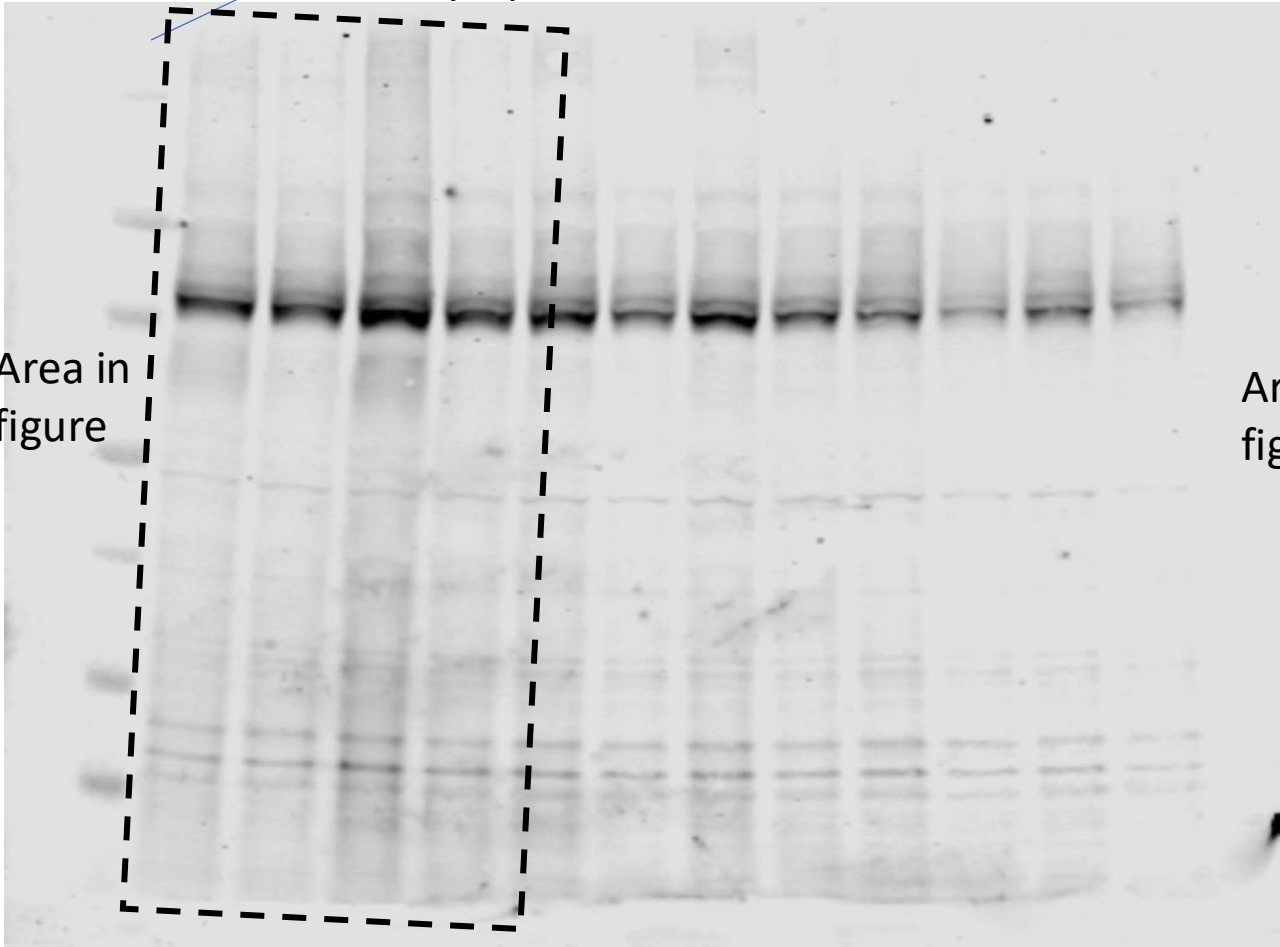

|        |   |   |   |   |   |   |   |   |   |   |   |   |
|--------|---|---|---|---|---|---|---|---|---|---|---|---|
| siRNA: | - | + | - | + | - | + | - | + | - | + | - | + |
| 2HB:   | - | - | + | + | - | - | + | + | - | - | + | + |

Sample overflow into ladder lanes

Nuclear extract

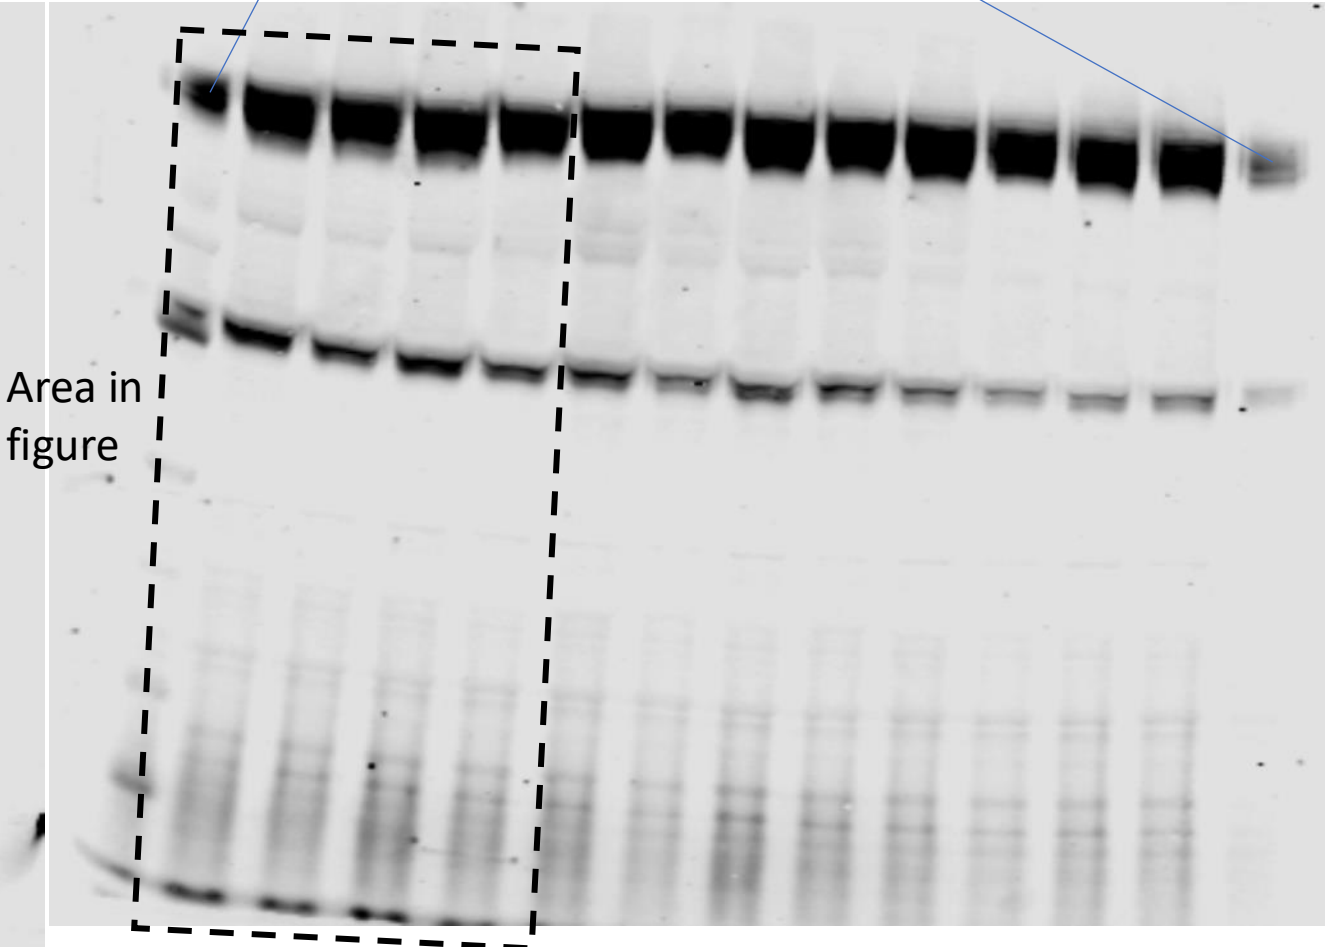

|   |   |   |   |   |   |   |   |   |   |   |   |
|---|---|---|---|---|---|---|---|---|---|---|---|
| - | + | - | + | - | + | - | + | - | + | - | + |
| - | - | + | + | - | - | + | + | - | - | + | + |

Figure 4F — C2C12 lysates transfected with siRNA against SIRT4 for non-targeting control, IP experiments

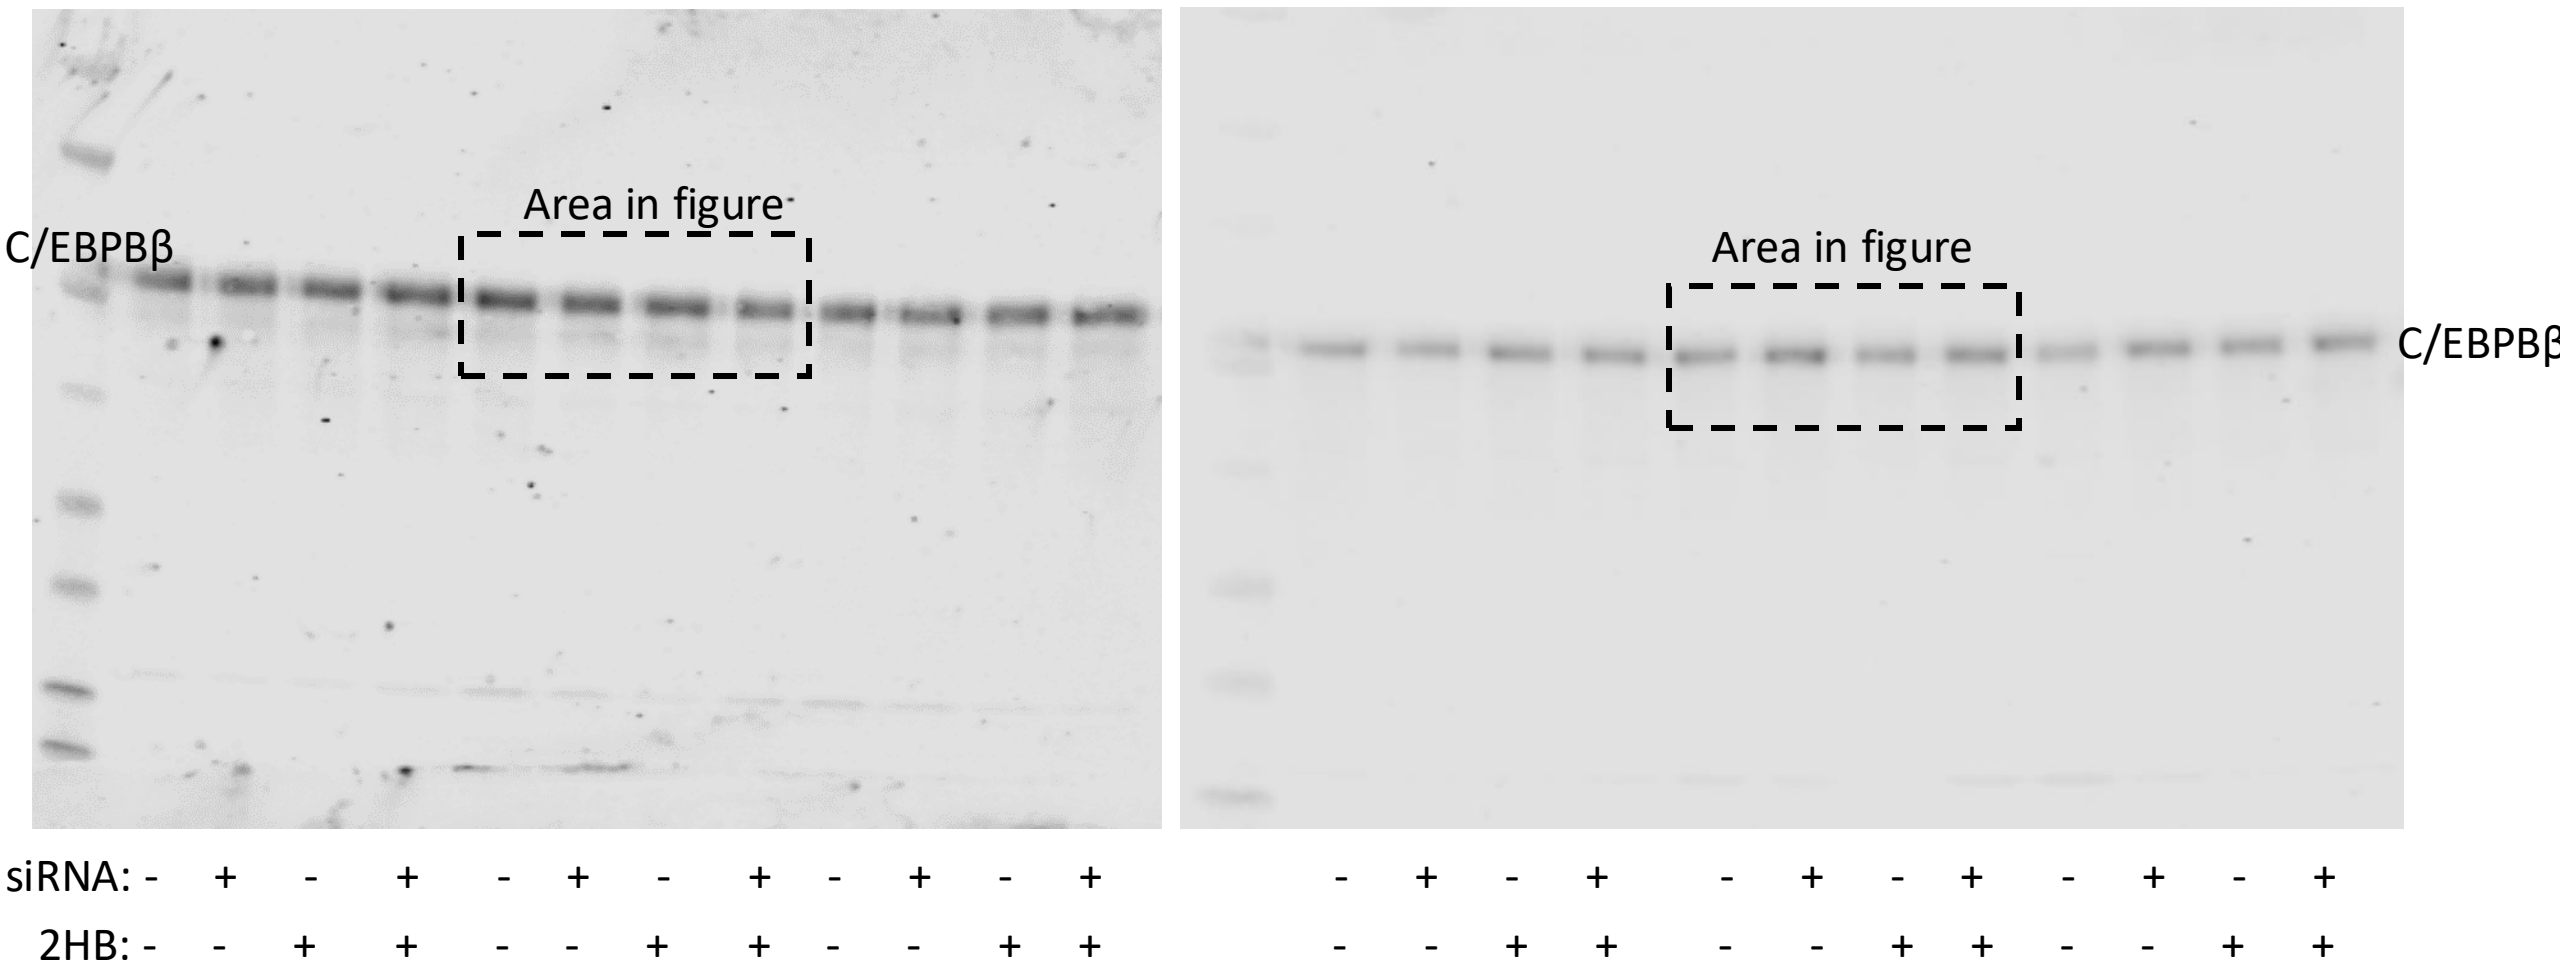

Figure 4F continued – C2C12 lysates transfected with siRNA against SIRT4 for non-targeting control, IP experiments, input samples blot for C/EBPbeta and H3

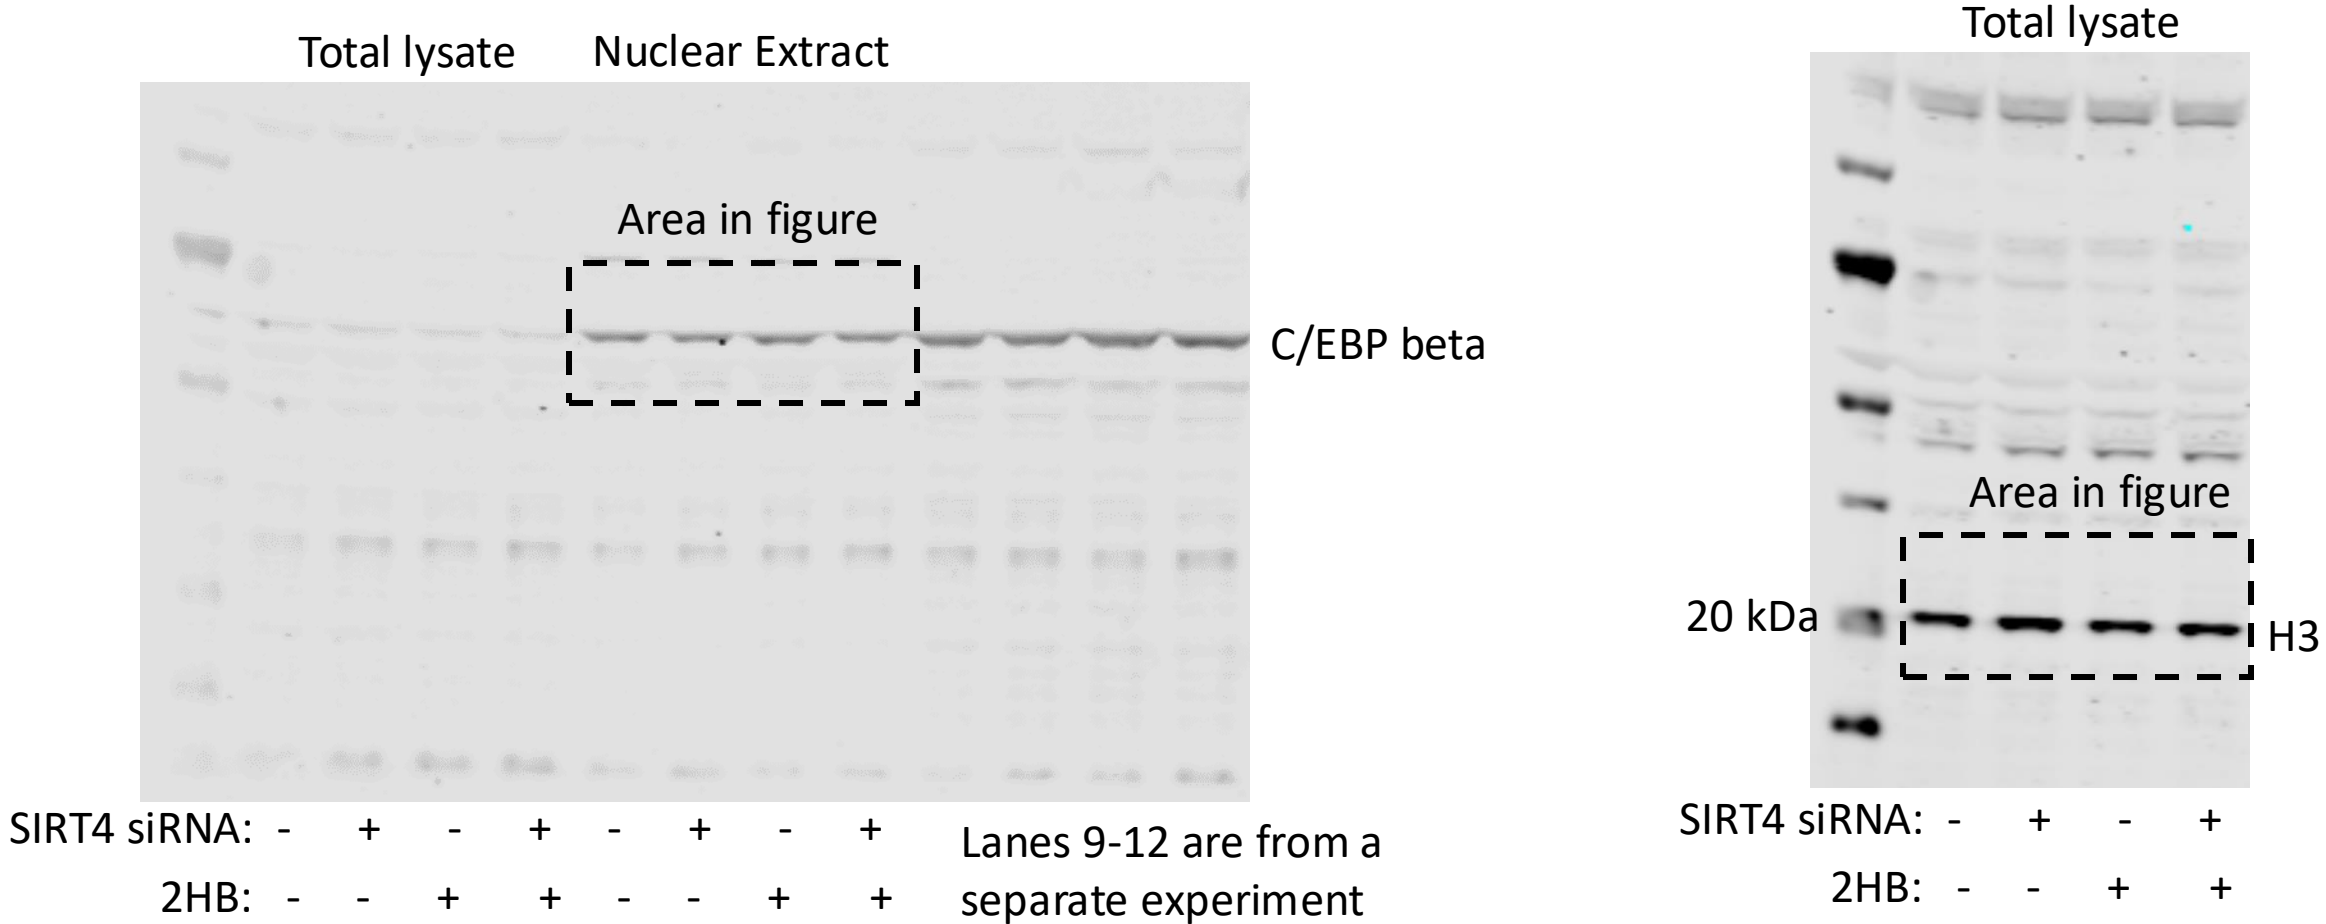

Supplement: fig4-data2 [file elife-92707-fig4-data2-v2.zip]
