# Supplementary material for: A 2-hydroxybutyrate-mediated feedback loop regulates muscular fatigue
Source: eLife journal article supplement (doi:10.7554/elife.92707), 2023-11-24

Figure 6A — Soleus lysates stained for total ADPr

Cytoplasmic extract

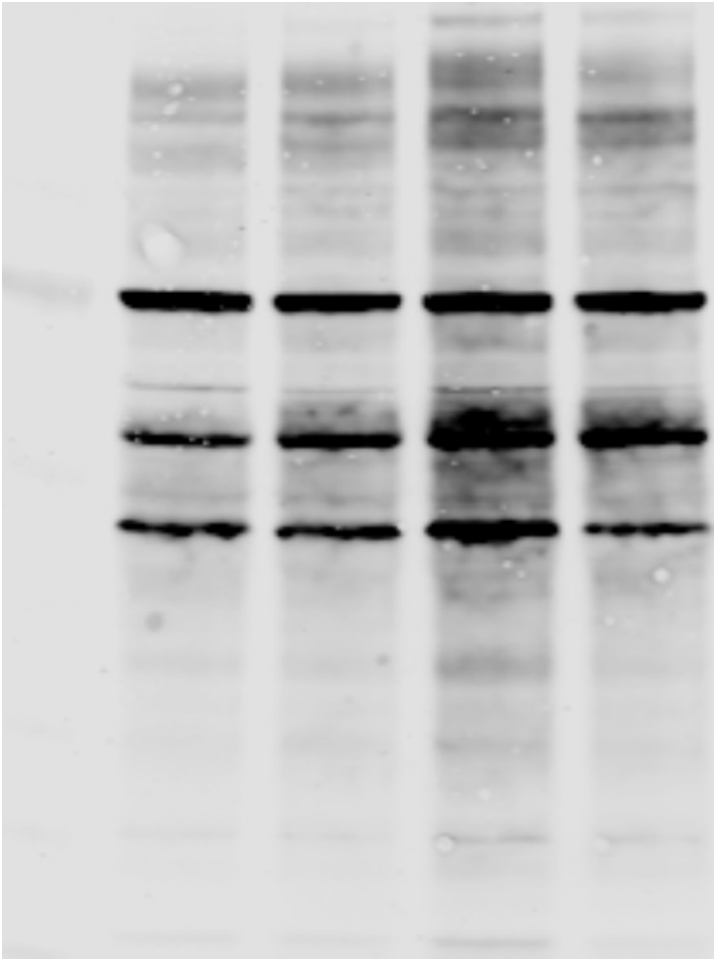

CL

CL

HB

HB

Nuclear extract

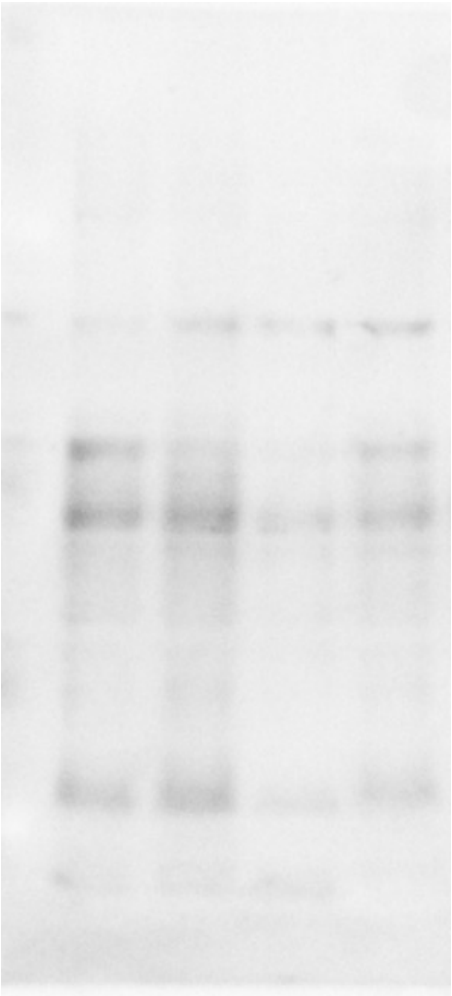

CL

CL

HB

HB

Figure 6B — Soleus lysates IP experiments,

IP against CEBP beta, blot for ADPr

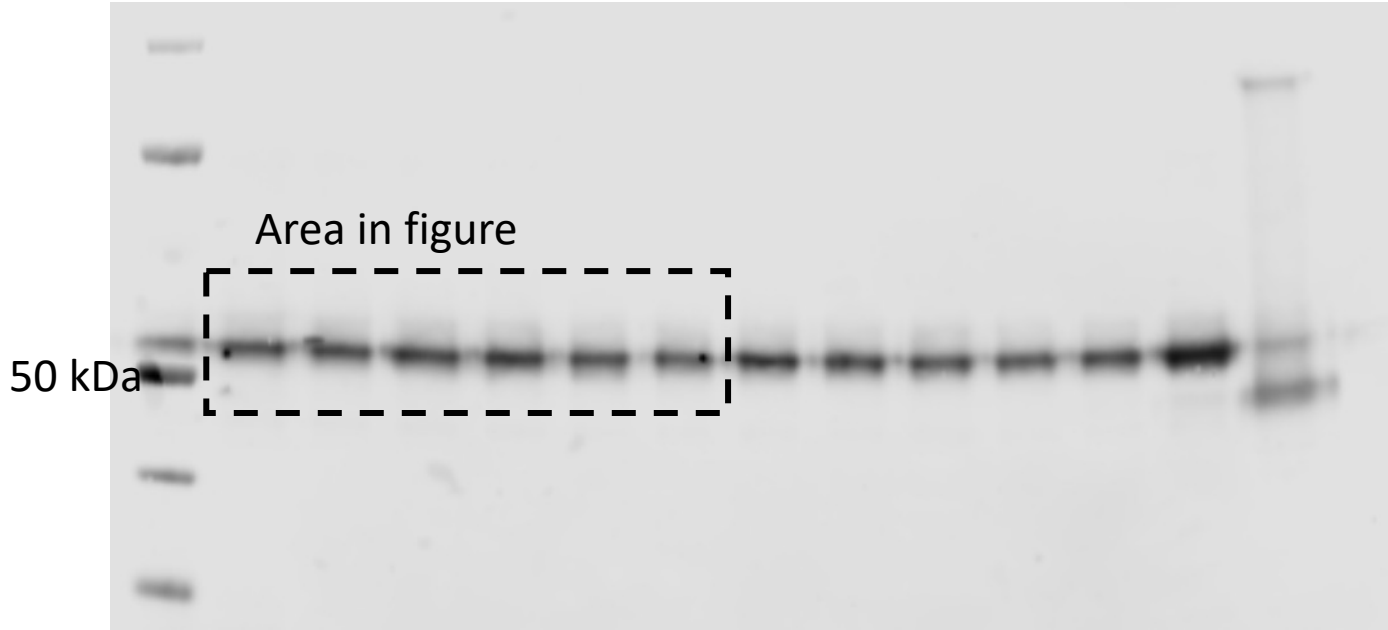

Treatment: CL CL CL HB HB HB CL CL CL HB HB HB

Input samples

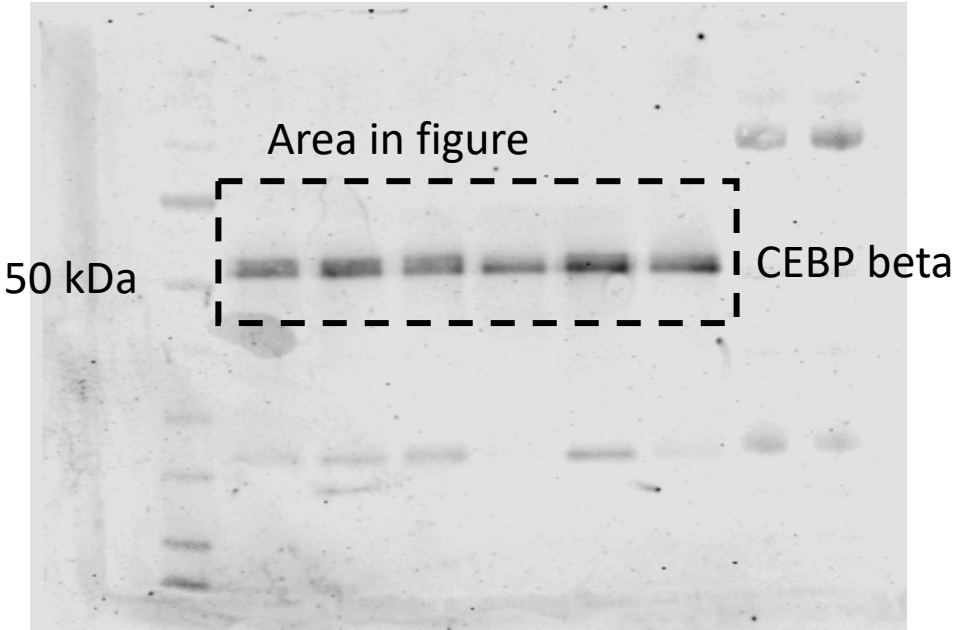

Treatment: CL CL CL HB HB HB

Matched samples

Figure 6B continued – Soleus lysates IP experiments,

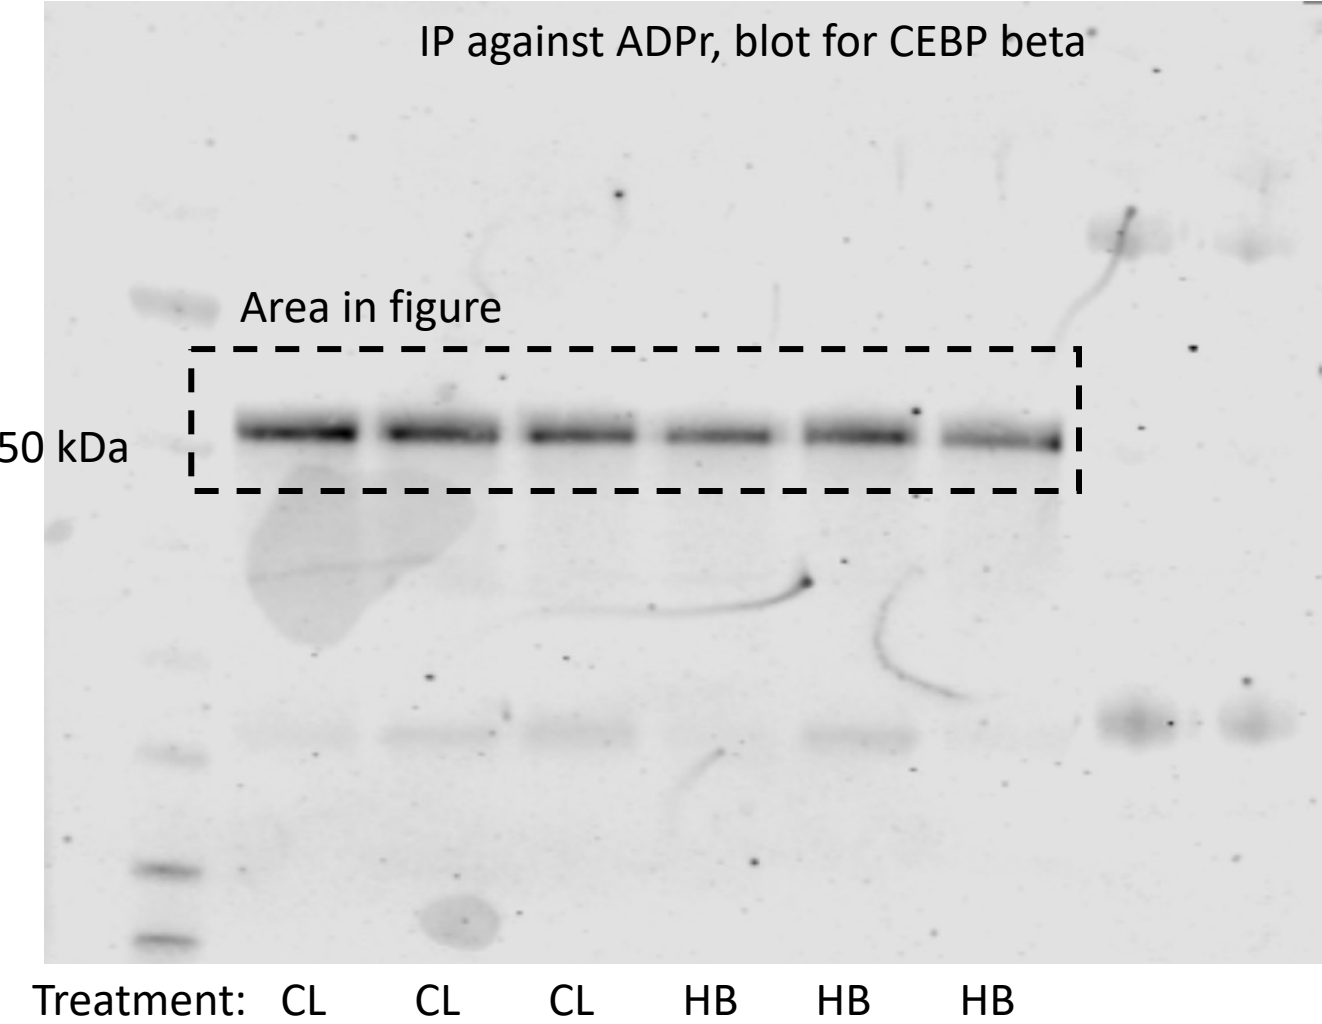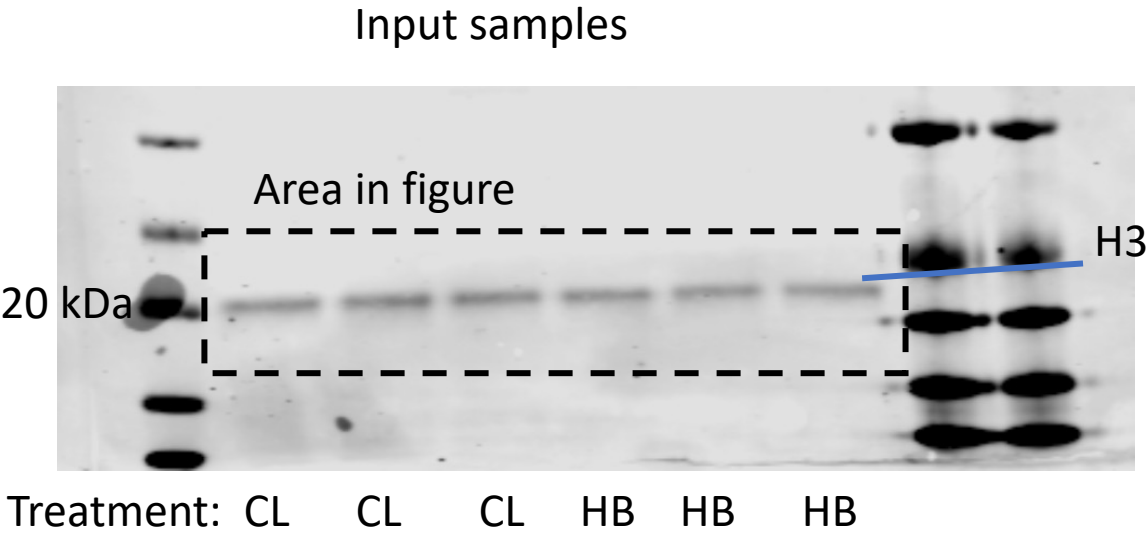

Figure 6D – Soleus lysates

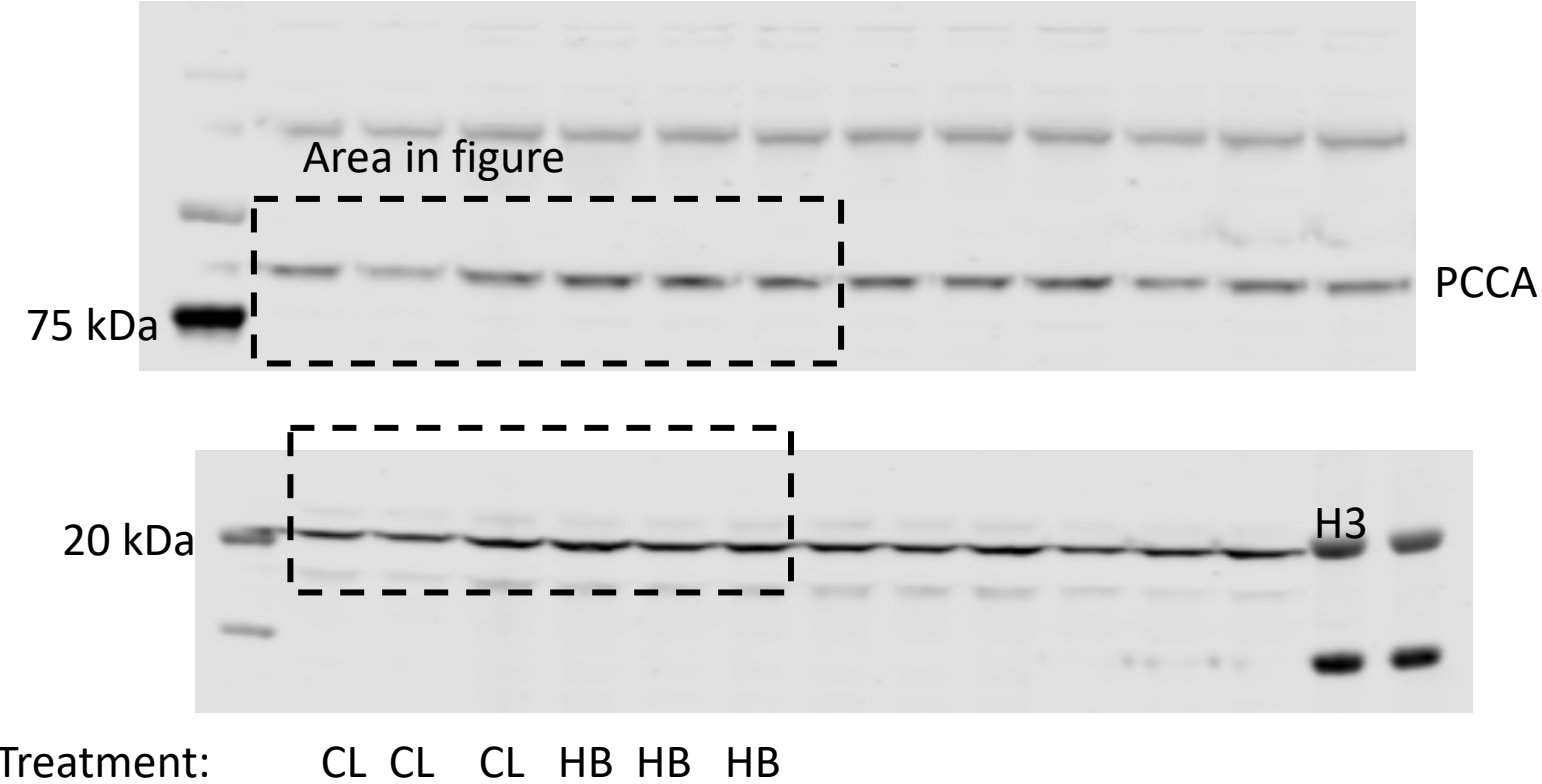

Figure 6E — Soleus lysates

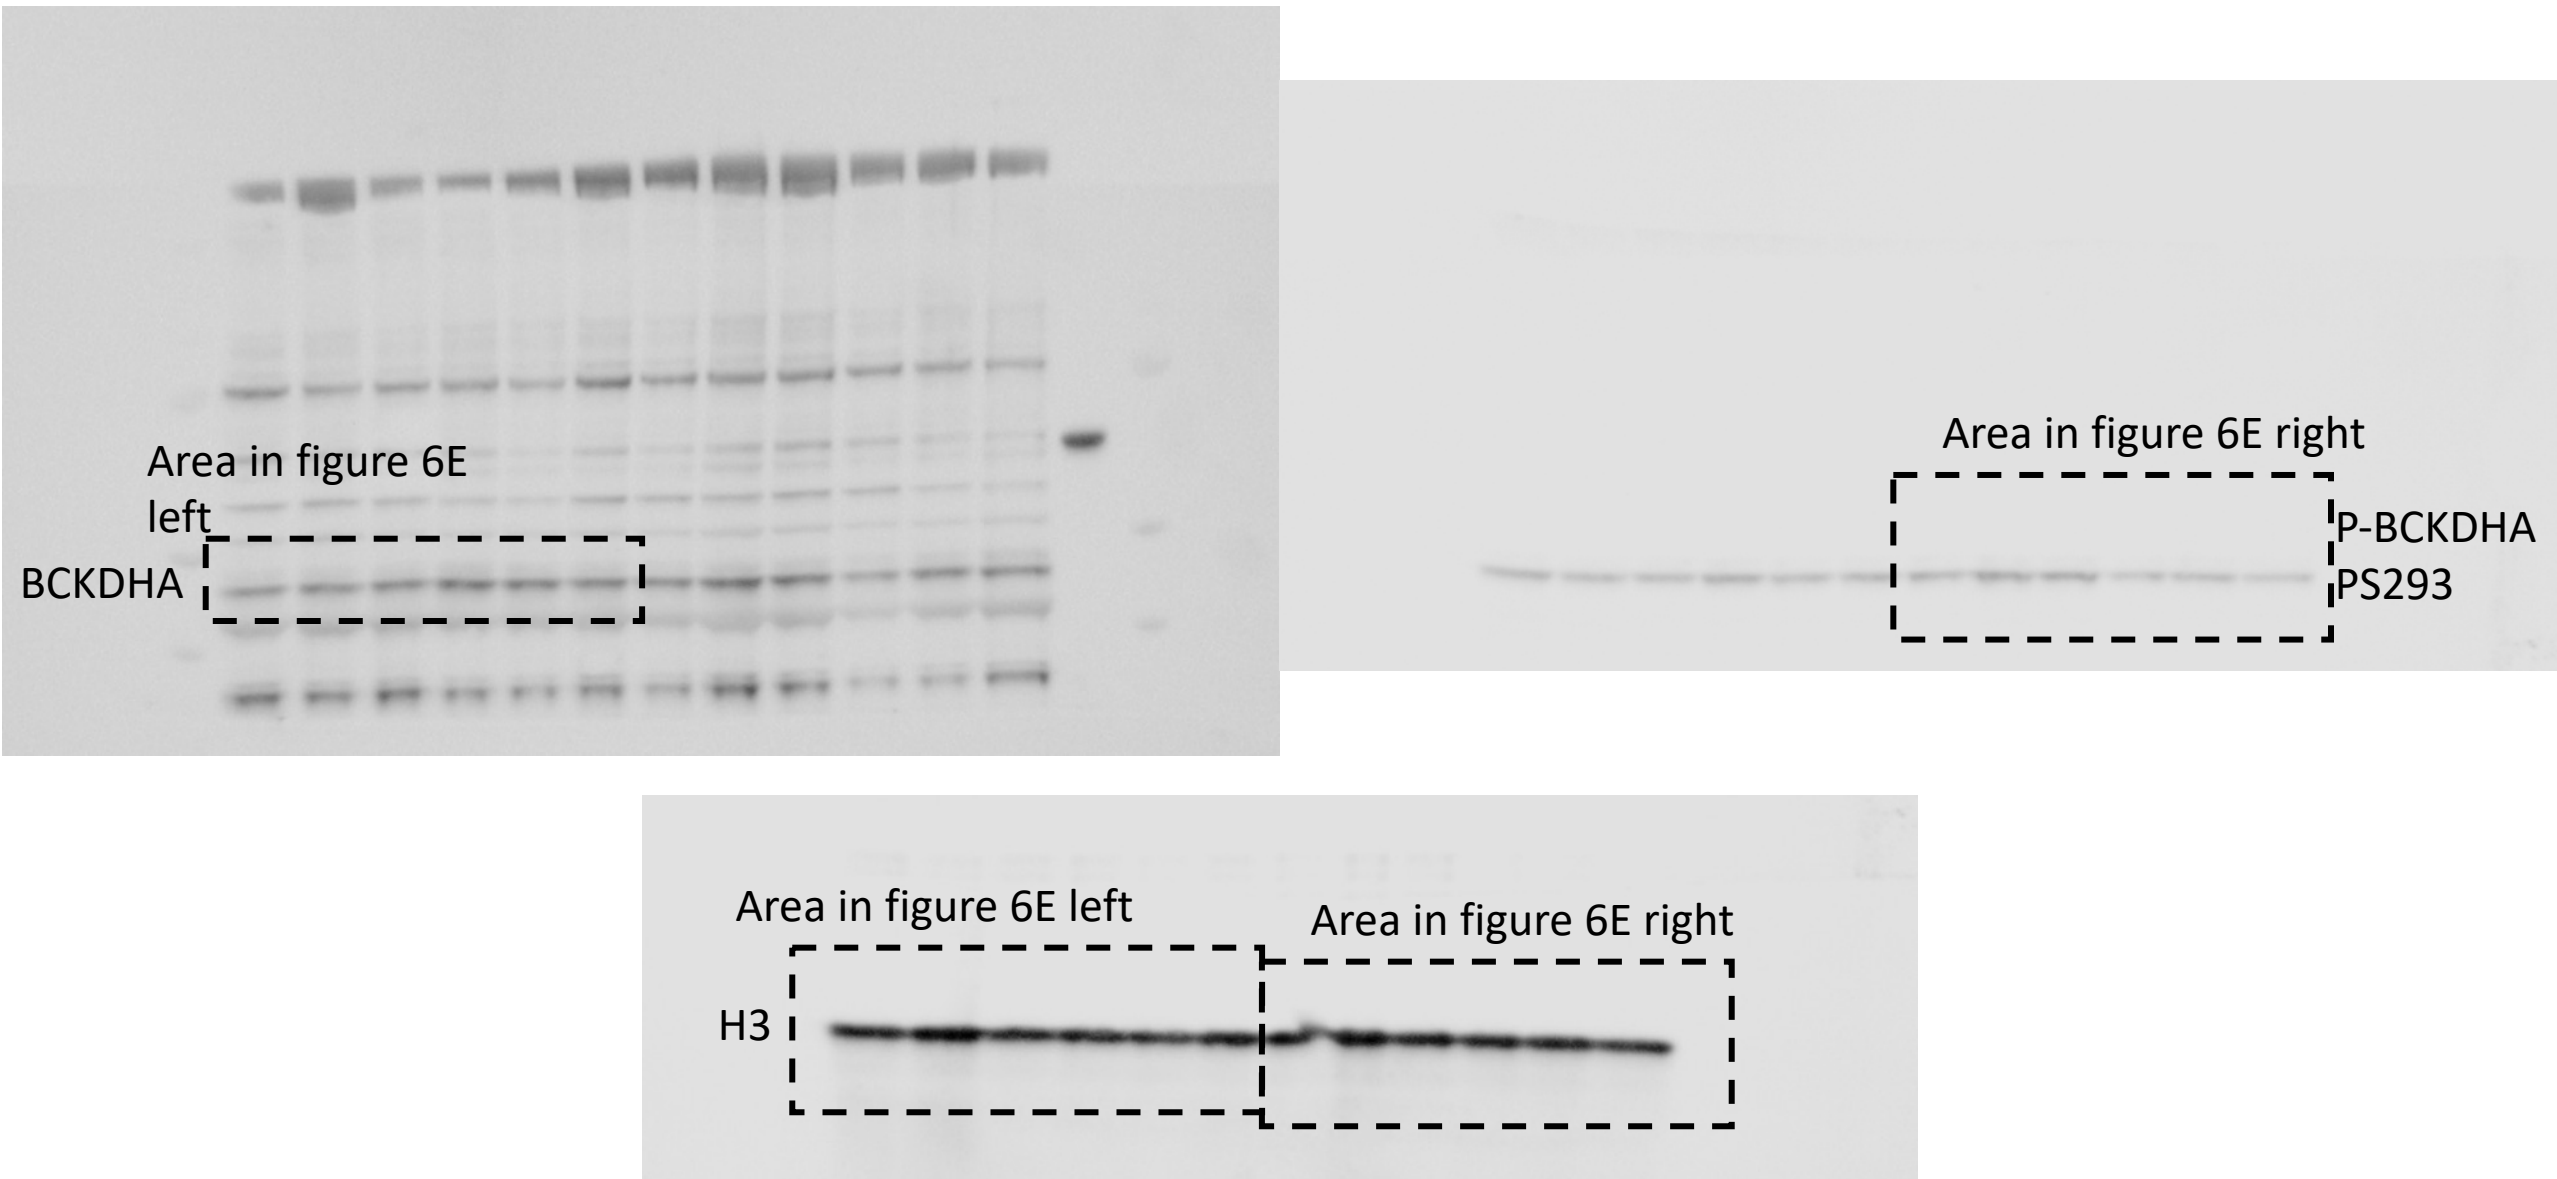

Figure 6F — EDL lysates

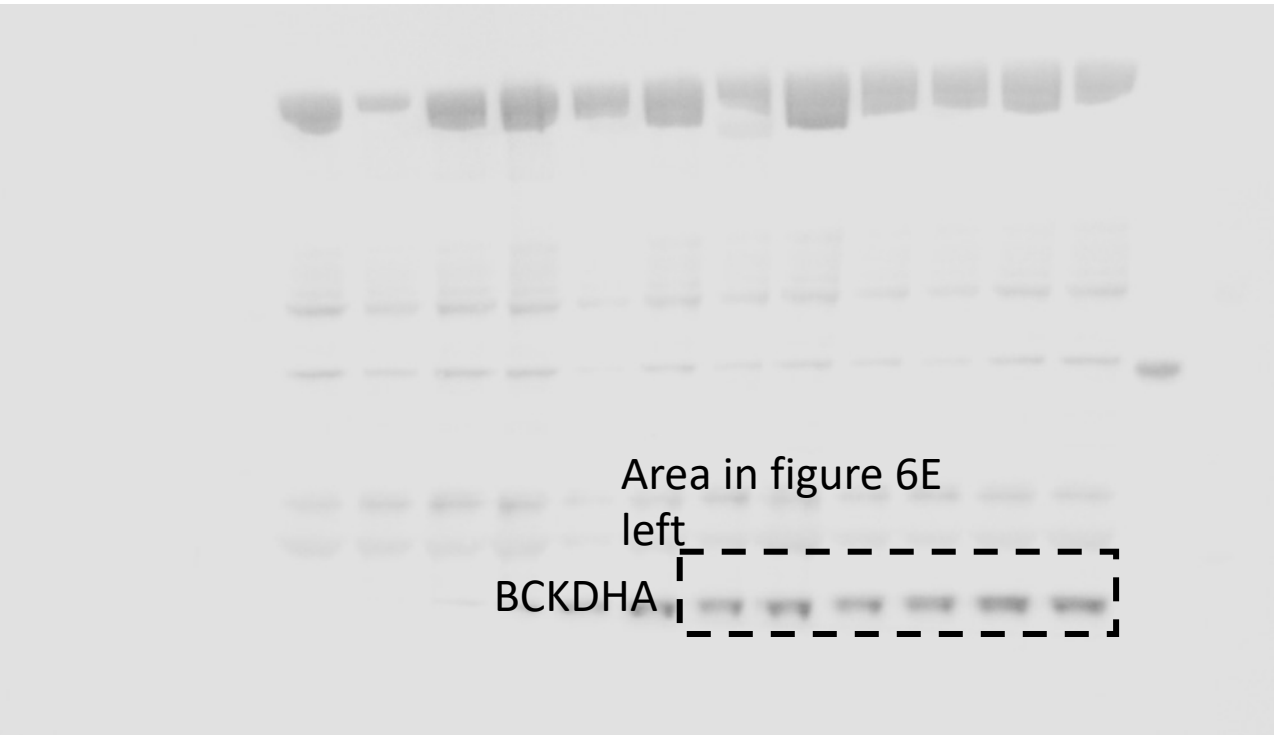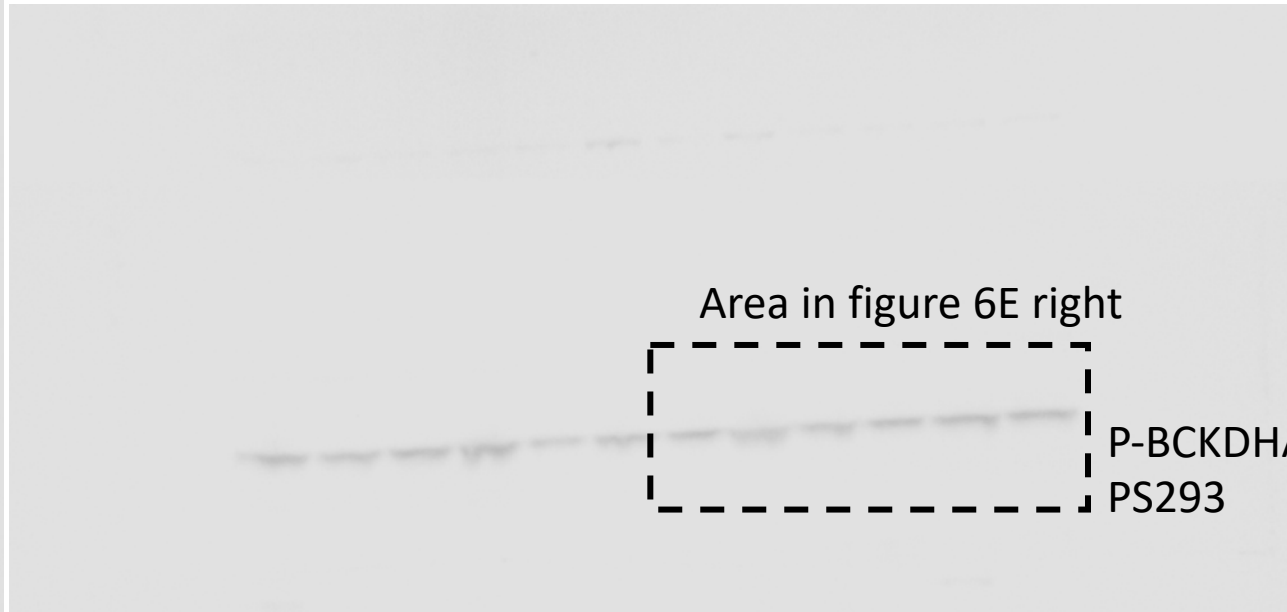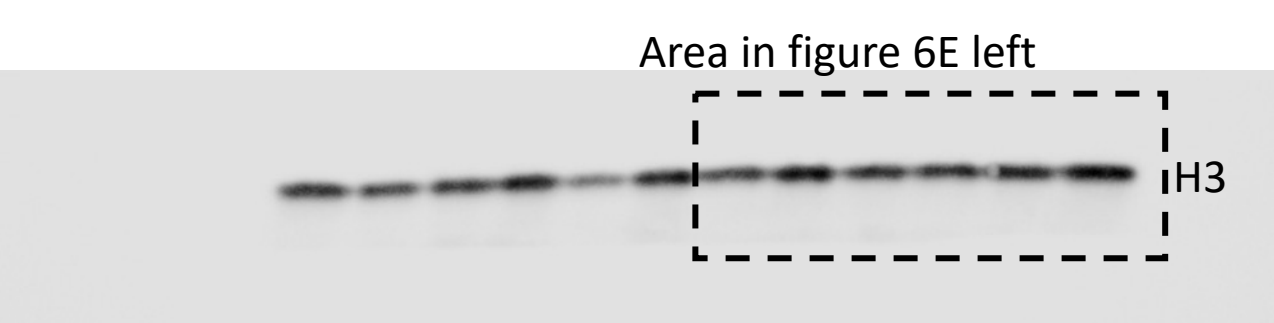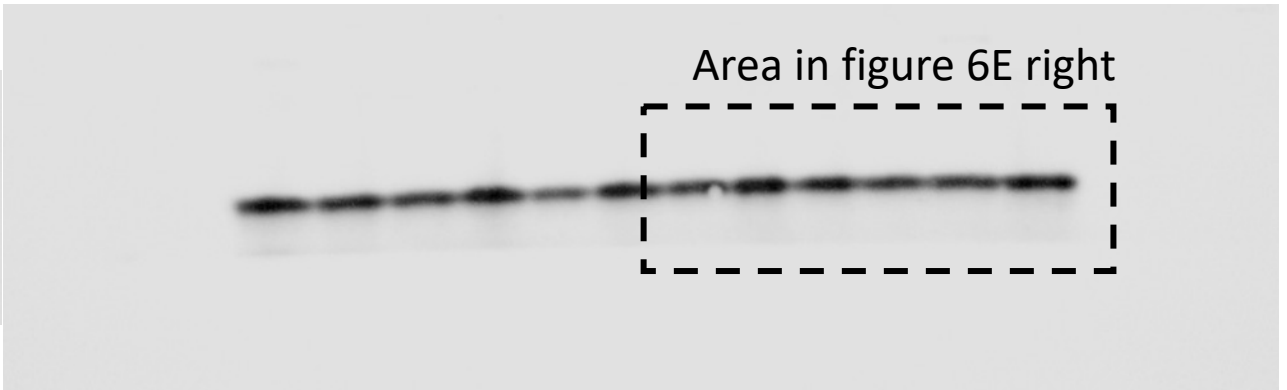

Supplement: fig6-data2 [file elife-92707-fig6-data2-v2.zip]
