# Supplementary material for: A 2-hydroxybutyrate-mediated feedback loop regulates muscular fatigue
Source: eLife. 2024 Sep 3;12:RP92707. doi: 10.7554/eLife.92707 (PMC11371357; doi:10.7554/eLife.92707)
Supplement: Figure 1—figure supplement 1—source data 1. [file elife-92707-fig1-figsupp1-data1.xlsx]

## Sheet: Supp_Fig_1A
	CL									HB
DAY 1	5264.67	4892.67	5024	4718	4114.71	4110.33	3784.42	4320		4975.83	4301.17	4387.67	4494.33	4634.5	4112.83	3651.67	4424.67
DAY 2	5052.67	5054.83	4881.5	4674.33	4426.5	4060.17	4297.33	4154.67		4987.17	4282	4316.33	4443.33	4548	4522.5	3712	4152.83
DAY 3	4878.5	4987.5	4955.33	4715.17	4336.17	4139.83	3391.33	4289.5		5087.5	4452.33	4219.17	4707.83	4506	4664.5	3722.33	4066
DAY 4	5106	4992.33	5326.17	4659.17	4831.33	3964.83	4186.83	4204.5		5065.33	4271.83	4210	4785.67	4656	4544.67	3698	4225.5
DAY 5	4978.17	4652.5	5079	5100	4601.33	4289.67	4491.17	4364.33		5065	4390.67	3985.67	4844.33	4668.17	4717.33	3643.83	4578.33

## Sheet: Supp_Fig_1B
18m/min		21m/min		24m/min
Time to Exhaustion (min)	ΔVO2	Time to Exhaustion (min)	ΔVO2	Time to Exhaustion (min)	ΔVO2
19	32.0417	19	24.5	19	182.583
13.75	438.893	13.75		13.75	473.25
15.25	257.742	17	318.833	15.25	325.708
17.75	745.25	17.75	478.292	17.75	829.417
19.25	819.792	19.25	667.833	19.25	908.708
15.75	763.72	23.75	248.75	23.75	934
20.75	-78.2083	15.75		15.75	831.792
23.5	575.708	20.75	385.917	20.75	492.417
19.25	465.917	23.5	813.667	23.5	1321.58
16.25	828.562	19.25	244.217	19.25	786
22.75	467.708	16.25		16.25	922.167
19.75	539.208	22.75	1085.38	22.75	1538.5
21.25	590.333	19.75	508.667	19.75	635.833
19.25	612.375	21.25	595.792	21.25	876.917
22.25	604	19.25	562.467	19.25	742.167
22.75	447.708	22.25	951.292	22.25	1196.29
18.25	192.167	22.75	857.458	22.75	1007.25
		18.25	261.917	18.25	322.25

## Sheet: Supp_Fig_1C
Time (min)	NaCl				Na2HB
10	0	0	0	0	0	0	0	0
20	32.25	-73	-103.25	-149	2.5	-48	-81.5	-129
30	-157.25	-154.75	-46.25	-169	10.75	-148.25	-104.25	-210.75
40	-174.25	-161	-33.75	-261	56.25	-63.5	-204.25	-236.75
50	-228	-239.5	-35.5	-335.25	-75.5	-91.25	-182	-434.75

## Sheet: Supp_Fig_1D
Time (min)	NaCl				Na2HB
10	0.822	0.7765	0.781	0.786	0.801	0.7775	0.7795	0.7875
20	0.813	0.7775	0.7695	0.7705	0.753	0.769	0.7675	0.7695
30	0.797	0.7745	0.7705	0.75	0.754	0.769	0.7605	0.7365
40	0.7785	0.7645	0.758	0.7305	0.7625	0.774	0.752	0.7315
50	0.774	0.76	0.764	0.7425	0.7615	0.7555	0.73	0.7485

## Sheet: Supp_Fig_1E
2HR		24HR		1WK
NaCl	Na2HB	NaCl	Na2HB	NaCl	Na2HB
3763.22	3915.72	4083.56	3734.33	4910.67	4966.56
4502.89	4404.11	4144.83	4012.44	4824.89	4669.33
5011.28	3982.83	4301.89	4103	4519.67	4533.33
4255.17	4214	4413.39	4480.67	5052.67	5230.89
3914.61	4276.94	4395.5	3945.72	4580.78	5068.67
4318.17	4034.22	4014.39	3760.89	4884.11	4647.56
3560.33	3721.39	3884.39	4222	4925.89	4513.67
3835.28	4468.17	4409.56	3910.06	4321.78	5058.33
4516.22	4162.83	4072.5	4124.17	4929.56	5760.44
		4192.78	4300.56	5109.67	4566.56
			4427.72	4793.89	5077.22
				4884.67	5211
				4303.89	4645.11

## Sheet: Supp_Fig_1F
	Speed (m/min)	NaCl											Na2HB
2HR	6	0.781528	0.737722	0.814833	0.787806	0.788611	0.815875	0.792625	0.80775				0.795111	0.765278	0.756333	0.757306	0.775361	0.788917	0.805458	0.78175
	9	0.807139	0.748611	0.807833	0.794806	0.798278	0.800083	0.800042	0.813458				0.81575	0.764556	0.749444	0.767	0.791694	0.805333	0.798375	0.79425
	12	0.806667	0.753694	0.809944	0.804306	0.81	0.806208	0.807292	0.822727				0.823778	0.773972	0.786972	0.790694	0.780806	0.820909	0.814167	0.799
	15	0.795222	0.765806	0.823833	0.817	0.806722	0.83275	0.825792	0.829667				0.835806	0.817861	0.80025	0.840806	0.792056	0.811333	0.820909	0.815455
	18	0.823583	0.790278	0.870444	0.874611	0.837972	0.857042	0.8415	0.8496				0.887472	0.865194	0.832861	0.867389	0.825	0.802083	0.832792	0.819091
	21	0.851889	0.858667	0.868	0.893333	0.867111	0.856333						0.970333	0.848667	0.841833	0.866303	0.795143	0.8005	0.865286
	Speed (m/min)	NaCl											Na2HB
24HR	6	0.823	0.835625	0.877792	0.865042	0.767875	0.786167	0.813625	0.8775	0.826542	0.823773		0.8015	0.817375	0.796042	0.840292	0.814864	0.86775	0.863667	0.81175	0.802625	0.817125	0.820682
	9	0.839708	0.844292	0.888208	0.853333	0.786375	0.796708	0.814	0.86175	0.819364	0.816333		0.802042	0.80375	0.796667	0.83575	0.835042	0.857417	0.839875	0.826	0.803875	0.827917	0.827417
	12	0.843833	0.848208	0.890625	0.855958	0.796833	0.82225	0.836208	0.869833	0.841	0.809292		0.804417	0.817667	0.815667	0.829167	0.854458	0.848625	0.863958	0.838917	0.827625	0.839125	0.824375
	15	0.893958	0.843667	0.901958	0.871042	0.791208	0.834667	0.885167	0.890833	0.859958	0.827182		0.809583	0.841458	0.814333	0.833625	0.86125	0.867375	0.926167	0.8505	0.85575	0.859917	0.913458
	18	0.915625	0.873	0.915	0.892167	0.796125	0.829042	0.882889	0.909458	0.9035	0.843542		0.864125	0.85	0.832792	0.846167	0.864458	0.8822	0.93525	0.912167	0.883958	0.9415
	21	0.92	0.93035	0.91	0.8995	0.821292	0.836542		0.9105				0.881938	0.8687	0.908375	0.845	0.88175			0.90875	0.9065
	Speed (m/min)	NaCl											Na2HB
1WK	6	0.810667	0.786667	0.742	0.769333	0.783333	0.754667	0.759	0.831	0.812333	0.746	0.851333	0.825	0.740333	0.784333	0.766667	0.778	0.827667	0.791333	0.822667	0.832667	0.809	0.82
	9	0.812667	0.802667	0.763	0.761333	0.785667	0.758667	0.786	0.846333	0.811333	0.757667	0.834	0.792333	0.772333	0.853667	0.77	0.801333	0.836333	0.795333	0.820333	0.828667	0.81	0.803667
	12	0.818	0.809333	0.777	0.805333	0.769	0.794667	0.808	0.868	0.813667	0.770667	0.837667	0.796667	0.798333	0.864667	0.773333	0.796667	0.842333	0.787333	0.807667	0.801333	0.832	0.811
	15	0.807333	0.827	0.782667	0.793	0.797333	0.812667	0.854333	0.882333	0.825333	0.815333	0.825333	0.811	0.799667	0.854	0.776667	0.823	0.839333	0.784667	0.818	0.792333	0.838	0.8
	18	0.829	0.826333	0.814	0.815333	0.806	0.779	0.786	0.842333	0.866333	0.810667	0.85	0.861333	0.81	0.854	0.817667	0.853333	0.879	0.806333	0.836333	0.809667	0.825667	0.814333
	21		0.855	0.893333	0.809667	0.874333	0.780667		0.835	0.871	0.777667		0.833333	0.859667		0.913333	0.859667	0.904333	0.791333	0.875667	0.816333	0.836667	0.829

## Sheet: Supp_Fig_1G
Time to Exhaustion (min)	ΔVO2 18 m/min	Time to Exhaustion (min)	ΔVO2 21 m/min	Time to Exhaustion (min)	ΔVO2max 24 m/min
19	56.6667	19	203.333	19	268.556
22.5	741.722	22.5	928.722	22.5	928.722
25.75	149.333	25.75	638	25.75	638
24.25	782.222	24.25	904.944	24.25	904.944
21.25	106.278	21.25	442.056	21.25	442.056
21	468.056	21	329.222	21	502.111
19.25	566.889	19.25	137.111	19.25	137.111
22.5	-51.7222	22.5	53.7778	22.5	757.056
21.25	-44.7778	21.25	96.1667	21.25	572.056
22.25	798.278	22.25	841.333	22.25	841.333
19	61.1667	19	354.667	19	354.667
23.5	233	23.5	459.722	23.5	459.722
22.25	690.722	22.25	861.667	22.25	861.667
21.5	727.944	21.5	921.444	21.5	921.444
24.25	1049.11	24.25	1071.22	24.25	1071.22
20.25	1045.83	20.25	1066.67	20.25	1066.67
24.25	300.833	24.25	542.5	24.25	542.5
27.25	370.167	27.25	935.333	27.25	935.333
24.25	402.806	24.25	684.222	24.25	684.222
24.25	377.556	24.25	810.333	24.25	810.333
23.75	623.056	23.75	876.333	23.75	876.333
24	301.778	24	405.333	24	405.333
24	528.611	24	566.333	24	566.333
23.5	330.111	23.5	506.778	23.5	506.778
22	690.667	22	828.444	22	828.444
27.25	531.611	27.25	1314.28	27.25	1314.28
