# Supplementary material for: A 2-hydroxybutyrate-mediated feedback loop regulates muscular fatigue
Source: eLife. 2024 Sep 3;12:RP92707. doi: 10.7554/eLife.92707 (PMC11371357; doi:10.7554/eLife.92707)
Supplement: Figure 1—source data 1. [file elife-92707-fig1-data1.xlsx]

## Sheet: Fig.1B
	Day 1																		Day 2																		Day 3
Speed (m/min)	CL									HB									CL									HB									CL									HB
6	123.042	0	72.3333	47.7917	58.625	93.1667	7.66667	64.8333		76.4583	39.2083	30.2917	0	0	127.25	58.25	59.375		75.0833	0	11.625	0	82.2917	89.1667	91.2917	69.0833		0	65.25	111.208	258.5	0	218.375	31.625	127.667		110.208	0	97.125	120.583	93.5417	17.0833	435.792	102.833		91.5417	0	0	35
8	540.333	197.667	247.417	134.208	81.125	368.25	105.375	334.042		289.875	266.292	368.25	265.667	70	245.979	188.292	233.083		576.458	196.208	242.333	227	490.833	517.333	213.167	353.5		165.458	335.625	481.208	521.083	98.4167	496.708	398.375	384.958		636.917	225.083	367.458	439.875	545.208	376.875	517.792	434.25		477.625	182.25	276.125	236.417
10	690.833	253.167	408.5	376.5	154.225	595	436.667	365.792		432.167	444.625	522.417	478	101.333	393.458	201.75	355.625		843.75	363.125	328.417	419.375	476.667	744.292	43.125	487.667		446.25	437.708	632.542	634.792	101.375	605.458	537.042	455.083		945.917	338.75	522.375	677	595.625	488.542	521.5	613.958		714.667	393.75	458.917	277.542
12	770.208	281.833	563.583	409.792	308.458	654.208	592.25	427.333		567.375	518.042	764.542	580.208	87.7083	387.438	121.208	410.458		890.042	350.083	419.5	441.5	377.792	809.375	-35.7083	610.25		637.75	463.958	744.458	575.958	82.0417	568.792	563.958	630.542		1055.08	328.5	627.375	610.042	598.958	323.875	575.667	706.417		721.708	415.083	479.75	313.042
14	809.792	110.208	578.708	118.417	252.042	677.833	550.958	481.833		622.792	451.583	682.833	643.792	22.6667	409.583	-52.5625	306.458		877	250.167	466.667	439.917	243.083	619.042	23.0833	656.458		638.375	341.042	674.167	487.708	188.708	746.708	516.625	577.583		1082.67	311.625	672.542	701.625	473.208	266.458	666.542	706.125		568.625	445.542	409.583	309.5
16	782.208	-55	591.708	170.208	590.375	611.667	639.583	376.375		577.375	273.5	525.958	652.5	37.5833	515.833	-48.5	332.5		794	108.5	592.958	452.792	41.75	485.583	-84.8333	653.042		622.792	368.875	602.417	432.792	151.75	833.625	353.208	337		880.875	333.917	664.583	763.208	300.708	323.083	632.125	570.625		633.083	546.083	379.167	265.958
18	647.167	6.08333	657.917	122.375	419	544.583	413.417	354.875		621.875	472.458	383.208	636.833	147.833	612.042	114.708	231.458		634.833	26.5	628.833	372.458	357	339.208	-92.2917	633.875		637.875	232.292	672.292	430.458	200.542	877.917	555.792	317.042		886	394.842	738.167	733.75	144.917	640.583	625.583	494.833		722.667	674.958	441.292	364.542
20	587.292	134.817	610.762	308.375	751	415.375	760.75	505.458		572.667	734.292	289.25	644.681	150.708	660.938	300.229	310.021		564.458		651.833	360.771	171.792	160.208	97.4167	618.542		593.875	222.792	775.917	540.583	349.833	986.042	703.19	484.417		843.042		725.778	845.292	104.667	729.979	793.778	530.958		715.833	883.25	714.75	457.729
22	462.958			547.611		267.583		578.875		319.583	969.381	684.292		269	690.458	425.135	416.333		503.333		774.417		226.889	25.2917	307.806	689.833		599.208	279.583	1139.33	748.542	523.688	1139.17		805.25		652.5			779.083	205.583			696.933		770.333	881.806	895.208	455.167
[truncated: 36 more columns]

## Sheet: Fig.1C
	CL									HB
DAY 1	155.583	300.083	362.5	576	356.667	809.625	705	584		654.5	540.833	886.333	373.333	272	698.25	473.667	398.667
DAY 2	857	395.583	288.083	487.625	478.667	593.167	825.5	714.333		696.25	527.333	933.292	530.833	606.375	986.042	720.333	441.333
DAY 3	929.667	462.042	693	622.875	407.042	630.167	775.167	749.167		864.5	942.917	937	605.042	547.667	920.5	828.167	959.167
DAY 4	1159.17	593.292	818.5	816.625	779.583	161.667	1167.46	940.5		736.667	1075.17	1338.67	786.667	554.25	841.667	696.333	983
DAY 5	1029	528.143	782.667	916.167	966.125	769.095	839.262	1261.19		475.292	940.333	1454.56	920.567	773.083	1304.67	951.028	770.833

## Sheet: Fig.1D
	Day 1																		Day 2																		Day 3
Speed (m/min)	CL									HB									CL									HB									CL									HB
6	0.864	0.7935	0.740333	0.790333	0.770833	0.752167	0.783	0.776		0.830167	0.761167	0.719167	0.817167	0.796333	0.748333	0.826	0.766333		0.807667	0.7655	0.783833	0.750833	0.751	0.757167	0.777333	0.837		0.8105	0.76	0.728667	0.789167	0.771667	0.7575	0.7605	0.748333		0.731333	0.787667	0.819	0.739667	0.7585	0.7585	0.737833	0.782167		0.7905	0.734333	0.699333	0.755
8	0.865458	0.786042	0.737208	0.772667	0.757375	0.762375	0.775667	0.775833		0.822625	0.747375	0.728792	0.806458	0.810125	0.736542	0.812708	0.757167		0.8145	0.765958	0.787333	0.757208	0.744083	0.769125	0.766208	0.83475		0.807833	0.76075	0.725292	0.790792	0.768667	0.764	0.7555	0.749583		0.725875	0.779	0.823167	0.743292	0.764625	0.736167	0.711208	0.769375		0.779083	0.741583	0.700625	0.746083
10	0.850125	0.772667	0.727417	0.773917	0.762333	0.764917	0.783833	0.770875		0.819792	0.751125	0.748083	0.800542	0.81125	0.743	0.803	0.752792		0.798958	0.7475	0.7835	0.774833	0.762708	0.787292	0.770333	0.825625		0.807042	0.759292	0.731042	0.798667	0.760667	0.777708	0.760917	0.762667		0.731292	0.758125	0.814125	0.762792	0.771292	0.73625	0.731542	0.764833		0.76425	0.747417	0.717583	0.748083
12	0.834042	0.773583	0.715542	0.778375	0.780792	0.777708	0.81675	0.788208		0.822458	0.757583	0.760208	0.808125	0.795583	0.766792	0.809833	0.75625		0.80325	0.756667	0.781792	0.775417	0.7705	0.791542	0.779417	0.829292		0.805875	0.764458	0.741125	0.800917	0.762417	0.772792	0.784417	0.765		0.729458	0.760917	0.814042	0.773125	0.776958	0.749667	0.745875	0.773208		0.775292	0.761	0.742875	0.768167
14	0.825167	0.78075	0.713042	0.789917	0.770417	0.782042	0.810667	0.780167		0.82125	0.763	0.738417	0.8265	0.797542	0.750083	0.810792	0.76275		0.808375	0.758083	0.781542	0.783792	0.761667	0.792042	0.788125	0.823042		0.812792	0.781583	0.756625	0.801958	0.760333	0.771833	0.788208	0.751458		0.733583	0.763417	0.815917	0.78325	0.775417	0.759167	0.739208	0.763		0.795625	0.763833	0.770083	0.775
16	0.82025	0.780625	0.735208	0.792292	0.7775	0.769708	0.806792	0.787583		0.824	0.773875	0.743417	0.822542	0.808	0.753125	0.811333	0.763875		0.81225	0.765458	0.776417	0.829708	0.753083	0.801833	0.797667	0.817875		0.806875	0.802958	0.751792	0.802583	0.776292	0.79225	0.788	0.761958		0.750833	0.761125	0.801125	0.769458	0.77775	0.75675	0.748875	0.767333		0.81275	0.759208	0.792125	0.793375
18	0.810958	0.8065	0.795708	0.788417	0.77525	0.764	0.866833	0.800833		0.828417	0.781833	0.745625	0.833042	0.810625	0.804083	0.811083	0.781708		0.830542	0.770917	0.774833	0.839	0.764083	0.792875	0.800375	0.806125		0.802333	0.789583	0.7445	0.807	0.838917	0.870042	0.789042	0.76925		0.7995	0.760083	0.797667	0.769583	0.777875	0.781958	0.770792	0.77575		0.802417	0.795625	0.778375	0.848875
20	0.815083	0.812375	0.786958	0.793333	0.772458	0.765208	0.899	0.811792		0.813708	0.86925	0.77275	0.85025	0.862	0.821708	0.819083	0.779167		0.854458	0.768306	0.78225	0.838583	0.857958	0.792667	0.82075	0.815417		0.80775	0.808208	0.743875	0.82025	0.846	0.885167	0.819083	0.773958		0.809708	0.756067	0.795083	0.788542	0.777208	0.878208	0.769917	0.76875		0.810542	0.784125	0.788917	0.844542
22	0.830667	0.799067	0.827929	0.798583	0.774233	0.765917	0.921208	0.83525		0.823458	0.904708	0.778083	0.833361	0.911042	0.857875	0.869625	0.774125		0.8625		0.80425	0.835187	0.830667	0.817125	0.892292	0.829458		0.807333	0.816042	0.786417	0.843583	0.88725	0.878417	0.882	0.796875		0.838		0.840889	0.806958	0.783333	0.903354	0.850556	0.783375		0.820333	0.798708	0.874208	0.840958
[truncated: 36 more columns]

## Sheet: Fig.1E
	Interval	CL	HB	CL	HB	CL	HB	CL	HB	CL	HB
D10CLDay1	21.25	1
D31CLDay1	17.25	1
D33CLDay1	17.75	1
D40CLDay1	18.75	1
D42CLDay1	18.25	1
D51CLDay1	17.25	1
D53CLDay1	20	1
D61CLDay1	17	1
D63CLDay1	19	1
D23HBDay1	20		1
D32HBDay1	19.25		1
D34HBDay1	19.75		1
D41HBDay1	17		1
D44HBDay1	18.75		1
D52HBDay1	18		1
D54HBDay1	18.5		1
D62HBDay1	19.5		1
D64HBDay1	17.75		1
D10CLDay2	18.5			1
D31CLDay2	15.5			1
D33CLDay2	20.75			1
D40CLDay2	18			1
D42CLDay2	18.875			1
D51CLDay2	18.75			1
D53CLDay2	19			1
D61CLDay2	19.5			1
D63CLDay2	20.75			1
D23HBDay2	21.25				1
D32HBDay2	22.25				1
D34HBDay2	21				1
D41HBDay2	19				1
D44HBDay2	19.875				1
D52HBDay2	20.25				1
D54HBDay2	19.25				1
D62HBDay2	17.75				1
D64HBDay2	19.5				1
D10CLDay3	18.5					1
D31CLDay3	15.25					1
D33CLDay3	16.75					1
D40CLDay3	18.5					1
D42CLDay3	18.25					1
D51CLDay3	19					1
D53CLDay3	18					1
D61CLDay3	17.5					1
D63CLDay3	19.25					1
D23HBDay3	21.5						1
D32HBDay3	19.5						1
D34HBDay3	19						1
D41HBDay3	18.25						1
D44HBDay3	18.625						1
D52HBDay3	16.5						1
D54HBDay3	17						1
D62HBDay3	20.5						1
D64HBDay3	15.25						1
D10CLDay4	16.25							1
D31CLDay4	15							1
D33CLDay4	17							1
D40CLDay4	20							1
D42CLDay4	16.875							1
D51CLDay4	22.5							1
D53CLDay4	16.5							1
D61CLDay4	16.75							1
D63CLDay4	21.25							1
D23HBDay4	20.75								1
D32HBDay4	23								1
D34HBDay4	19								1
D41HBDay4	17								1
D44HBDay4	19								1
D52HBDay4	19.5								1
D54HBDay4	19								1
D62HBDay4	17.75								1
D64HBDay4	16.5								1
D10CLDay5	19									1
D31CLDay5	13.75									1
D33CLDay5	15.25									1
D40CLDay5	17.75									1
D42CLDay5	19.25									1
D51CLDay5	23.75									1
D53CLDay5	15.75									1
D61CLDay5	20.75									1
D63CLDay5	23.5									1
D23HBDay5	19.25										1
D32HBDay5	16.25										1
D34HBDay5	22.75										1
D41HBDay5	19.75										1
D44HBDay5	21.25										1
D52HBDay5	19.25										1
D54HBDay5	22.25										1
D62HBDay5	22.75										1
D64HBDay5	18.25										1

## Sheet: Fig.1F
	Day 1																						max
Speed (m/min)	NaCl											Na2HB											NaCl	Na2HB
6	139.111	140.611	124.333	76.3056	203.722	140.861	181.333	55.7222				213.806	142.139	0	79.2778	227.556	194.667	0	228.639	150.806			517.236	603.793
9	471.583	471.639	277.472	481.222	548.417	277.639	347.333	276				585.139	118.556	489.861	488.028	536.611	433.528	36.8611	341.806	459			526.778	521.667
12	409.056	374.097	238.806	278.333	320.583	372.111	365.972	392.667				664.722	-67.1389	641.139	437.472	485.5	473.806	-95.8611	369.722	622.361			378.722	641.139
15	424.111	357.569	304.889	326.972	195.528	394.306	331.75	310.583				535.028	-5.25	565.722	430.306	367.833	361.194	-104.5	313.083	667.5			496	592.697
18	524.5	448.111	378.722	466.556	187.556	412.806	336.19	217.522				642.278	146.444	576.75	365.306	539.778	95.6944	-38.5278	122.258	745.167			601	539.778
21	652.194	526.889	150.722	496	392.639	373.25						607.793	521.667	545.033	592.697	427.246	122.778	224.623		640.5			412.806	473.806
																							365.972	224.623
																							392.667	369.722

## Sheet: Fig.1G
	Day 2																						max
Speed (m/min)	NaCl											Na2HB											NaCl	Na2HB
6	9.33333	137.583	185.972	113.333	136.75	176.333	13.7778	73.3611	161.667			240.194	370.111	49.6944	323.361	132.556	103.556	32.2778	122.639	79.0833	32.1389	86.0833	261.833	847.417
9	189.417	472.361	501.25	335.694	360.528	479.333	180.722	408.778	242.889			701.389	446.056	336.139	413.806	421.25	479.389	189.639	584.917	331.583	184.694	280.194	709.9	564.028
12	191.056	487.417	527.833	328	557	444.667	117.639	609.139	169.833			807	564.028	240.556	339.389	533.861	659.722	453.917	650.306	490.972	9.30556	306.75	527.833	443.389
15	261.833	480.417	427.389	47.9444	606.306	426	48.2778	672.111	-103.25			738.111	495.139	131.778	327.528	568.5	667.944	373.417	683.639	449.528	117.833	405	335.694	413.806
18	255.306	515.722	22.0202	-316.167	649.389	360.981	-6.58333	634.786	-262.333			767.944	503.528	239.583	365.444	406.556	644.111	82.3333	704.222	372.25	466.861	455	21.0556	568.5
21		709.9			535.944		-2.77778					847.417	494.489	357.667	252.333	298.944	650		801.069	368.5	534.444		649.389	667.944
																							479.333	453.917
																							180.722	801.069
																							672.111	490.972
																							242.889	534.444
																								306.75

## Sheet: Fig.1H
	1 Week																										max
Speed (m/min)	NaCl													Na2HB													NaCl	Na2HB
6	30.7778	11.6111	188.722	141.222	90.4444	470	180.278	400.667	274.944	216.5	20.6667	46.2222	322.389	30.1667	173.167	207.056	221.056	70.8889	241.389	572.556	141.5	95.7778	289	177.333	333	189.667	268.556	921.444
9	235.222	129.444	196.222	24.8889	0	502.111	494.222	757.056	433.944	340.389	293	52.6667	392.889	-5.77778	274.556	540.833	184	306.667	561.167	748.556	229.778	187.333	499.833	364.167	578.722	389.944	928.722	1071.22
12	143.056	286.167	32.5556	442.5	161.333	401.889	382.833	395.944	572.056	508.222	0	0	402.222	481.5	423.167	902.944	115.056	37.8333	545.417	521.667	179.833	181.333	518.778	199.778	689.389	435.611	196.222	1066.67
15	268.556	353.722	154.889	556.5	40.1111	400	536.444	38.6667	352.556	614.944	23.2778	139.222	622.778	638.056	807.389	883.944	64.9444	204.278	381.583	392.556	383.611	370.667	542.5	82.6111	730.667	584.111	904.944	542.5
18	56.6667	741.722	149.333	782.222	106.278	468.056	566.889	-51.7222	-44.7778	798.278	61.1667	233	690.722	727.944	1049.11	1045.83	300.833	370.167	402.806	377.556	623.056	301.778	528.611	330.111	690.667	531.611	442.056	935.333
21	203.333	928.722	137.111	904.944	442.056	329.222	638	53.7778	96.1667	841.333	354.667	459.722	861.667	921.444	1071.22	1066.67	542.5	935.333	684.222	810.333	876.333	405.333	566.333	506.778	828.444	1314.28	502.111	684.222
																											638	810.333
																											757.056	876.333
																											572.056	405.333
																											841.333	566.333
																											354.667	506.778
																											459.722	828.444
																											861.667	1314.28
