# Supplementary material for: A 2-hydroxybutyrate-mediated feedback loop regulates muscular fatigue
Source: eLife. 2024 Sep 3;12:RP92707. doi: 10.7554/eLife.92707 (PMC11371357; doi:10.7554/eLife.92707)
Supplement: Figure 2—figure supplement 1—source data 1. [file elife-92707-fig2-figsupp1-data1.xlsx]

## Sheet: SUPP_FIG_2A
SATO		Serum						Liver						Muscle						Heart						BAT						Hypothalamus						eWAT
	Control	46968712	30025528	39192480	39410764	51991336	65387852	16879968	6263492	13664878	16318701	17803360	21153858	1890990	1434091	1535854	1686609	2335392	2406826	7541767	5375596	7317665	8407672	9458269	10332890	2917562	2179484	2972668	3089883	4307003	2106579	3333736	2900797	2443796	2967390	3579109	2836335	541089	838521	1422807	1067630	1081493	791219
	Exercise	454823584	98208744	318539776	205251120	87238144	224092432	102031416	21353474	66295696	44227576	21304658	50068544	18659468	4480187	12191023	7678118	3275469	8346112	52203460	17698376	44558028	29971010	13201122	34795152	23000982	6560612	17102468	9889712	5327007	12336104	16120205	6066556	14665948	11609928	5250400	12386639	6115374	1721181	11907743	3888147	1342385	2653834
RUNDQVIST		Plasma						Muscle						Spleen
	Control	4554453	7205306	2219228	7362152	9924861	8210160	1278346	930412	1664968	962519	981960	1052826	1525475	1585790	2022523	1283500	1287212	1312578
	Exercise	12733108	14195179	9112210	10389453	20241256	1.46448e+07	2228578	2963363	1.8282e+06	2846610	3290796	2847512	2.07156e+06	3225783	2022442	2318163	2654668	3491747

## Sheet: SUPP_FIG_2B
	VALINE												ISOLEUCINE												LEUCINE												3-METHYL-2-OXOBUTYRATE												4-METHYL-2-OXOBUTYRATE
	Vehicle						2-Hydroxybutyrate						Vehicle						2-Hydroxybutyrate						Vehicle						2-Hydroxybutyrate						Vehicle						2-Hydroxybutyrate						Vehicle
Sedentary	2.03604	1.13493	0.417791	0.675616	0.62722	-1.03487	-0.815137	0.471633	-0.867004	-1.43516	-0.520737	-1.25901	-0.624499	1.77682	1.03191	1.379	0.899419	-0.790125	-0.73073	1.0672	0.121474	-0.927712	0.368475	-1.0865	0.271849	1.7347	1.21921	0.901974	0.958608	-1.0248	-0.723749	1.19639	-0.0343841	-0.895308	0.267611	-1.10495	0.0800667	0.10409	-0.0255048	-0.0976584	-1.80377	0.320586	-1.13432	-0.481086	-0.45739	-0.268806	-0.805143	1.46612	0.0387335
Runner	0.814692	0.561126	-0.876505	1.66083	-0.591542	0.787149	-0.466499	-0.127337	1.01901	-0.326936	-0.912564	-1.13715	0.841834	0.886043	-1.12943	1.67316	-0.388668	0.961959	-0.755263	-0.542336	0.756707	-1.11743	-1.38781	-1.47064	1.16139	0.846231	-1.20844	1.60677	-0.707093	1.05466	-0.978948	-0.664804	0.82242	-0.975067	-1.38838	-1.69875	-0.112295	-0.150438	-1.48751	0.735578	0.310694	0.185711	1.45973	0.687047	1.04084	1.80021	0.970449	0.932392	-0.442429
[truncated: 71 more columns]

## Sheet: SUPP_FIG_2C
	VALINE												ISOLEUCINE												LEUCINE												3-METHYL-2-OXOBUTYRATE												4-METHYL-2-OXOBUTYRATE
	Vehicle						2-Hydroxybutyrate						Vehicle						2-Hydroxybutyrate						Vehicle						2-Hydroxybutyrate						Vehicle						2-Hydroxybutyrate						Vehicle
Sedentary	0.183251	0.991676	0.708354	0.50669	0.749177	-0.170507	0.238636	0.721159	-0.449024	-0.37919	1.05854	0.847734	0.954514	0.883337	0.729273	0.386984	0.56169	-0.415603	-0.284736	0.66303	-0.136168	-0.670278	1.24051	1.30492	0.976474	0.7754	0.846394	0.198895	0.705312	-0.726036	-0.0673298	1.19548	-0.369185	-0.531769	1.41647	1.38817	0.595935	-0.67853	-0.0059174	1.07542	0.219638	0.796465	-1.0617	-0.247194	0.619741	-1.00578	-2.64098	-0.593174	-2.03604
Runner	0.0994492	2.34155	-0.658228	1.43898	0.577444	0.899991	0.490178	-2.19655	-0.701518	-1.97484	-1.31655	-2.1813	0.245537	2.16345	-0.984949	1.40595	0.0829532	1.19857	0.974259	-2.29823	-0.665034	-2.0227	-1.16476	-2.28817	0.504674	2.15478	-1.19226	1.00516	-0.369217	1.38225	0.953943	-2.33512	-0.968269	-1.9643	-1.14337	-2.24712	-0.120682	-0.315367	0.178301	1.14302	0.407775	0.00866067	-2.92637	1.4232	1.73856	1.12708	-0.814178	-0.10777	-1.04023
[truncated: 71 more columns]

## Sheet: SUPP_FIG_2D
	VALINE												ISOLEUCINE												LEUCINE												3-METHYL-2-OXOBUTYRATE												4-METHYL-2-OXOBUTYRATE
	Vehicle						2-Hydroxybutyrate						Vehicle						2-Hydroxybutyrate						Vehicle						2-Hydroxybutyrate						Vehicle						2-Hydroxybutyrate						Vehicle
Sedentary	-0.503025	-1.93664	1.97131	1.07959	-1.27197	-0.811174	-0.104691	-0.188957	0.930637	-1.00913	-0.0909886	-0.736816	-0.420981	-2.32809	2.0269	0.918235	-0.972225	-1.01523	-0.0418979	-0.584409	1.35793	-0.730762	0.213271	-0.483756	-0.364741	-2.1672	2.22913	1.24844	-0.998918	-0.874763	0.23636	-0.194676	1.35145	-0.599961	0.102686	-0.662898	-0.779769	-1.13274	0.589368	0.544576	-0.201128	-1.02682	-1.30801	1.24944	0.341077	-0.963896	-0.326441	-1.58762	-1.04245
Runner	-0.44566	0.900604	-0.257346	1.55342	-0.40839	1.15234	0.0586215	0.50354	0.743224	-0.078688	-1.18297	-0.14698	-0.625876	0.866349	-0.315492	1.32108	-0.321103	0.949515	0.380178	0.196403	0.768608	0.448383	-1.41463	-0.373365	-0.459953	0.489926	-0.69002	1.20671	-0.371234	1.32457	-0.0207753	0.215179	0.626442	0.210439	-1.53183	-0.490163	-0.961323	2.29941	0.718968	1.33738	0.155755	0.233432	-1.39625	1.16624	0.833134	0.771255	0.163152	-0.82233	-0.275393
[truncated: 71 more columns]
