# Supplementary material for: A 2-hydroxybutyrate-mediated feedback loop regulates muscular fatigue
Source: eLife. 2024 Sep 3;12:RP92707. doi: 10.7554/eLife.92707 (PMC11371357; doi:10.7554/eLife.92707)
Supplement: Figure 2—source data 1. [file elife-92707-fig2-data1.xlsx]

## Sheet: Fig.2A
From Sato et al				From Rundqvist et al
	pcor	pval			pcor	pval
indolelactate_serum	0.963	0.0183		N.N.dimethylalanine_plasma	0.994	0.0262
tiglyl carnitine (C5)_serum	0.962	0.0184		X3.methyl.2.oxobutyrate_plasma	0.967	0.0306
N-acetylvaline_serum	0.943	0.0209		spermidine_plasma	0.967	0.0307
1-methyl-4-imidazoleacetate_serum	0.943	0.0209		cystine_plasma	0.923	0.0391
N-acetylalanine_serum	0.92	0.0243		N.acetyl.1.methylhistidine._plasma	0.92	0.0396
2-oxoadipate_serum	0.912	0.0255		N.acetyl.isoputreanine_plasma*	0.908	0.0423
2-oxoarginine*_serum	0.91	0.0257		X3.methyl.2.oxovalerate_plasma	0.904	0.0432
cystathionine_serum	0.91	0.0258		X3.indoxyl.sulfate_plasma*	0.901	0.044
succinoyltaurine_serum	0.907	0.0263		X3.hydroxyisobutyrate_plasma	0.899	0.0444
3-methyl-2-oxobutyrate_serum	0.903	0.0269		cysteinylglycine.disulfide._plasma	0.882	0.0486
N-acetylisoleucine_serum	0.902	0.0272		N.acetylglycine_plasma	0.869	0.052
N-acetylglycine_serum	0.899	0.0277		C.glycosyltryptophan_plasma	0.868	0.0524
2-aminoadipate_serum	0.892	0.0288		hydroxyasparagine_plasma	0.866	0.0528
3-(4-hydroxyphenyl)lactate (HPLA)_serum	0.891	0.0292		trans.urocanate_plasma*	0.856	0.0555
3-hydroxyisobutyrate	0.886	0.03		X4.methyl.2.oxopentanoate_plasma	0.846	0.0585
isovalerylcarnitine (C5)_serum	0.868	0.0335		phenol.glucuronide_plasma	0.846	0.0585
tigloylglycine_serum	0.867	0.0336		N.acetylcitrulline_plasma	0.832	0.0629
N-acetylcitrulline_serum	0.863	0.0344		prolylhydroxyproline_plasma	0.824	0.0653
picolinate_serum	0.861	0.035		cysteine.glutathione.disulfide_plasma	0.806	0.0715
N-acetylmethionine sulfoxide_serum	0.858	0.0357		alpha.ketoglutarate_plasma	0.798	0.0742
glutarylcarnitine (C5-DC)_serum	0.855	0.0363		N.formylmethionine_plasma	0.794	0.0759
2-aminobutyrate_serum	0.851	0.0372		X5.methylthioribose_plasma	0.79	0.0775
argininate*_serum	0.842	0.0391		isovalerate..C5._plasma	0.775	0.0831
isovalerate (C5)_serum	0.835	0.0408		X3.methylhistidine_plasma	0.765	0.087
3-methylcrotonylglycine_serum	0.835	0.0409		creatinine_plasma	0.763	0.0881
phosphate_serum	0.835	0.0409		homocitrulline_plasma	0.761	0.0887
5-hydroxyindoleacetate_serum	0.823	0.0439		beta.hydroxyisovaleroylcarnitine_plasma	0.757	0.0906
indoleacetylglycine_serum	0.818	0.0452		N.N.N.trimethyl.5.aminovalerate_plasma	0.754	0.0917
4-methyl-2-oxopentanoate_serum	0.814	0.0462		N.acetyltryptophan_plasma	0.744	0.0964
N-acetylleucine_serum	0.81	0.0472		X5..galactosylhydroxy..L.lysine_plasma	0.735	0.1
urea_serum	0.81	0.0472		X4.methoxyphenol.sulfate_plasma	0.731	0.102
isobutyrylglycine (C4)_serum	0.809	0.0474		N.acetylleucine_plasma	0.731	0.102
4-hydroxyphenylacetate_serum	0.805	0.0487		carnosine_plasma	0.727	0.104
pyruvate_serum	-0.801	0.0497		creatine.phosphate_plasma	0.722	0.106
alpha-ketoglutarate_serum	-0.817	0.0453		X3.hydroxy.2.ethylpropionate_plasma*	0.72	0.107
N6-acetyllysine_serum	-0.822	0.0442		alpha.hydroxyisocaproate_plasma	0.719	0.108
N2-acetyllysine_serum	-0.853	0.0366		dopamine.3.O.sulfate_plasma	0.719	0.108
pyroglutamine*_serum	-0.876	0.0319		citrate_plasma	0.714	0.11
succinate_serum	-0.896	0.0282		N.acetylkynurenine..2._plasma	0.709	0.113
betaine_serum	-0.94	0.0214		phenol.sulfate_plasma	0.703	0.116
isovalerylglycine_serum	0.8	0.05		ethylmalonate_plasma	0.701	0.117
2,3-dihydroxy-5-methylthio-4-pentenoate (DMTPA)*_serum	0.787	0.054		dimethylglycine_plasma	0.7	0.118
3-methylglutaconate_serum	0.783	0.055		X4.imidazoleacetate_plasma	0.695	0.12
1-methylhistamine_serum	0.775	0.0576		pyroglutamine._plasma	0.687	0.124
3-amino-2-piperidone_serum	-0.772	0.0585		hypotaurine_plasma	0.686	0.125
malate_serum	-0.771	0.0589		S.methylcysteine_plasma	0.686	0.125
N-acetyltaurine_serum	0.769	0.0596		cystathionine_plasma	0.684	0.126
S-1-pyrroline-5-carboxylate_serum	-0.768	0.06		urea_plasma	0.669	0.135
methionine sulfoxide_serum	-0.767	0.0602		X2.oxoarginine._plasma	0.655	0.143
1-methyl-5-imidazoleacetate_serum	0.749	0.0667		X5.aminovalerate_plasma	-0.643	0.15
indoleacrylate_serum	-0.742	0.0692		thyroxine_plasma	0.634	0.156
1-carboxyethylvaline_serum	-0.739	0.0703		S.adenosylhomocysteine..SAH._plasma	0.631	0.158
N-formylanthranilic acid_serum	0.738	0.0706		N.acetylhomocitrulline_plasma	0.618	0.167
N-acetylmethionine_serum	0.732	0.0729		malate_plasma	0.614	0.169
serotonin_serum	0.732	0.0729		succinylcarnitine..C4.DC._plasma	0.607	0.175
N-methylproline_serum	-0.727	0.0748		X4.acetamidobutanoate_plasma	0.605	0.176
N-acetylglutamate_serum	0.725	0.0756		tiglyl.carnitine..C5._plasma	0.605	0.176
1-carboxyethylphenylalanine_serum	-0.725	0.0757		N.delta.acetylornithine_plasma	0.604	0.177
valine_serum	0.72	0.0778		N.acetylserine_plasma	0.597	0.182
fumarate_serum	-0.717	0.0792		N.acetylhistidine_plasma	0.595	0.183
N2,N5-diacetylornithine_serum	0.714	0.0802		X5.methylthioadenosine..MTA._plasma	0.594	0.184
S-adenosylhomocysteine (SAH)_serum	0.71	0.0822		citrulline_plasma	0.593	0.185
cysteine sulfinic acid_serum	-0.709	0.0823		fumarate_plasma	0.593	0.185
N-acetylputrescine_serum	0.708	0.0829		N6.N6.N6.trimethyllysine_plasma	0.591	0.186
2-methylcitrate/homocitrate_serum	-0.707	0.0835		X5.hydroxylysine_plasma	0.588	0.189
indolepropionate_serum	-0.706	0.0839		S.methylcysteine.sulfoxide_plasma	0.586	0.19
hydroxyasparagine_serum	0.695	0.0886		X3.methylglutaconate_plasma	0.575	0.198
3-hydroxyisobutyrate_serum	0.694	0.0891		imidazole.propionate_plasma	0.576	0.198
N-methyl-GABA_serum	-0.691	0.0906		formiminoglutamate_plasma	0.573	0.2
cysteinylglycine disulfide*_serum	-0.687	0.0924		N.acetylisoleucine_plasma	0.573	0.2
2-methylbutyrylglycine (C5)_serum	0.685	0.0935		alpha.hydroxyisovalerate_plasma	0.55	0.219
1-carboxyethylisoleucine_serum	-0.684	0.0938		glutarylcarnitine..C5.DC._plasma	0.546	0.222
4-guanidinobutanoate_serum	-0.669	0.101		N.acetyltyrosine_plasma	0.542	0.226
imidazole propionate_serum	0.666	0.103		N2.N5.diacetylornithine_plasma	0.54	0.227
leucine_serum	0.661	0.105		kynurenine_plasma	0.539	0.228
N-acetylproline_serum	-0.655	0.108		N.acetylvaline_plasma	0.533	0.233
creatine_serum	-0.653	0.11		N.acetylglutamate_plasma	0.52	0.245
N-acetylhistidine_serum	0.645	0.114		N.acetylputrescine_plasma	0.519	0.246
N-acetylserine_serum	0.644	0.115		X2.methylbutyrylcarnitine..C5._plasma	0.517	0.248
N-acetylcarnosine_serum	-0.642	0.116		serotonin_plasma	0.508	0.256
alanine_serum	-0.627	0.125		anthranilate_plasma	0.506	0.258
glutathione, oxidized (GSSG)_serum	-0.626	0.125		aconitate..cis.or.trans._plasma	0.498	0.265
C-glycosyltryptophan_serum	0.616	0.131		hydroxyproline_plasma	0.483	0.28
5-(galactosylhydroxy)-L-lysine_serum	-0.608	0.136		X2.oxoadipate_plasma	0.476	0.288
ethylmalonate_serum	0.609	0.136		glutamate_plasma	0.475	0.288
alpha-hydroxyisovalerate_serum	0.603	0.14		isoleucine_plasma	0.468	0.295
N2,N6-diacetyllysine_serum	0.603	0.14		N.acetylalanine_plasma	0.468	0.296
spermidine_serum	-0.6	0.141		ophthalmate_plasma	0.466	0.297
2-methylbutyrylcarnitine (C5)_serum	0.6	0.142		tyrosine_plasma	0.464	0.3
4-hydroxycinnamate sulfate_serum	-0.597	0.143		N.acetylphenylalanine_plasma	0.461	0.303
1-carboxyethyltyrosine_serum	-0.596	0.144		glutamine_plasma	0.455	0.309
sarcosine_serum	0.595	0.145		histidine_plasma	0.453	0.311
cysteine-glutathione disulfide_serum	-0.583	0.153		glutathione..oxidized..GSSG._plasma	0.446	0.319
creatinine_serum	0.581	0.155		X3..4.hydroxyphenyl.lactate..HPLA._plasma*	0.438	0.328
beta-hydroxyisovaleroylcarnitine_serum	0.58	0.156		aspartate_plasma	0.432	0.334
N6,N6-dimethyllysine_serum	-0.575	0.159		beta.hydroxyisovalerate_plasma	0.428	0.339
N-acetyl-1-methylhistidine*_serum	0.571	0.162		valine_plasma	0.418	0.35
N6-methyllysine_serum	0.563	0.168		X4.hydroxyphenylpyruvate_plasma	0.415	0.354
cis-urocanate_serum	0.559	0.171		N.formylphenylalanine_plasma	-0.413	0.356
formiminoglutamate_serum	0.559	0.171		tryptophan_plasma	0.411	0.358
hydantoin-5-propionate_serum	0.547	0.18		succinoyltaurine_plasma	0.405	0.365
glutamine_serum	-0.539	0.186		leucine_plasma	0.402	0.369
N-acetyl-3-methylhistidine*_serum	0.524	0.199		phenylacetate_plasma	0.385	0.389
2-hydroxy-4-(methylthio)butanoic acid_serum	0.524	0.199		indoleacrylate_plasma	0.379	0.396
proline_serum	-0.523	0.2		indolepropionate_plasma	0.378	0.398
trans-urocanate_serum	0.524	0.2		X3.methylcrotonylglycine_plasma*	0.375	0.402
isoleucine_serum	0.523	0.201		phenylalanine_plasma	0.373	0.405
p-cresol glucuronide*_serum	-0.521	0.202		X4.hydroxyphenylacetate_plasma	0.371	0.406
3-methyl-2-oxovalerate_serum	0.518	0.204		gentisate_plasma	-0.371	0.407
beta-hydroxyisovalerate_serum	0.518	0.204		X3.methoxytyrosine_plasma	0.359	0.423
3-methylhistidine_serum	0.518	0.205		tricarballylate_plasma	-0.354	0.428
4-hydroxyphenylpyruvate_serum	0.514	0.208		taurine_plasma	0.35	0.434
isocitric lactone_serum	-0.509	0.213		glycine_plasma	0.349	0.435
lysine_serum	0.498	0.223		anserine_plasma	0.348	0.436
3-hydroxy-2-ethylpropionate_serum	0.496	0.225		S.methylglutathione_plasma	0.346	0.439
N-alpha-acetylornithine_serum	0.492	0.229		catechol.glucuronide_plasma	0.345	0.441
S-methylcysteine_serum	0.485	0.234		X4.hydroxycinnamate.sulfate_plasma	-0.334	0.456
histamine_serum	-0.482	0.238		isovalerylcarnitine..C5._plasma	0.329	0.462
anserine_serum	-0.479	0.241		creatine_plasma	0.316	0.48
alpha-hydroxyisocaproate_serum	0.473	0.246		N.acetylmethionine_plasma	0.314	0.482
indolepropionylglycine_serum	0.469	0.25		methionine.sulfone_plasma	0.312	0.486
phenol glucuronide_serum	0.466	0.253		N.acetylthreonine_plasma	0.311	0.487
N-acetylkynurenine (2)_serum	0.462	0.257		S.1.pyrroline.5.carboxylate_plasma	0.308	0.492
3-indoxyl sulfate_serum	-0.461	0.259		indolelactate_plasma	0.307	0.493
5-aminovalerate_serum	-0.461	0.259		N2.N6.diacetyllysine_plasma	0.305	0.495
gentisate_serum	0.456	0.264		histamine_plasma	0.285	0.524
N,N-dimethylalanine_serum	-0.455	0.265		indolepropionylglycine_plasma	0.281	0.529
indole-3-carboxylate_serum	-0.449	0.271		phenyllactate..PLA._plasma	0.275	0.539
phenylalanine_serum	-0.446	0.274		N.alpha.acetylornithine_plasma	-0.272	0.543
5-methylthioadenosine (MTA)_serum	0.439	0.282		N6.methyllysine_plasma	0.269	0.547
N,N,N-trimethyl-alanylproline betaine (TMAP)_serum	-0.434	0.287		xanthurenate_plasma	-0.268	0.549
5-methylthioribose_serum	-0.434	0.288		p.cresol.glucuronide._plasma	0.265	0.554
thyroxine_serum	-0.421	0.303		dimethylarginine..ADMA...SDMA._plasma	0.26	0.561
N-acetylthreonine_serum	-0.414	0.31		succinate_plasma	0.26	0.561
kynurenine_serum	0.413	0.311		N.acetyl.aspartyl.glutamate..NAAG._plasma	0.254	0.569
N-monomethylarginine_serum	-0.413	0.312		N.methyl.GABA_plasma	0.252	0.573
N-acetylarginine_serum	0.41	0.316		pipecolate_plasma	0.25	0.575
carboxyethyl-GABA_serum	-0.403	0.323		argininate._plasma	0.246	0.583
phenylpyruvate_serum	-0.398	0.33		N.acetyltaurine_plasma	-0.241	0.589
carnosine_serum	-0.394	0.335		N.acetylglutamine_plasma	0.241	0.591
phenol sulfate_serum	0.365	0.371		N6.acetyllysine_plasma	0.234	0.601
cysteine s-sulfate_serum	-0.364	0.373		acetylphosphate_plasma	0.233	0.602
aconitate [cis or trans]_serum	0.358	0.38		phosphate_plasma	0.224	0.616
S-methylcysteine sulfoxide_serum	0.355	0.385		indole.3.carboxylate_plasma	0.224	0.617
(N(1) + N(8))-acetylspermidine_serum	0.354	0.386		X4.guanidinobutanoate_plasma	0.22	0.622
methionine_serum	-0.349	0.392		X4.hydroxyphenylacetate.sulfate_plasma	-0.22	0.624
4-acetamidobutanoate_serum	0.345	0.398		N2.acetyllysine_plasma	0.219	0.625
1-ribosyl-imidazoleacetate*_serum	0.338	0.407		alpha.ketoglutaramate._plasma	0.216	0.629
ornithine_serum	-0.328	0.421		N.methylproline_plasma	0.21	0.638
guanidinoacetate_serum	0.319	0.435		betaine_plasma	0.201	0.653
ophthalmate_serum	0.315	0.44		carboxyethyl.GABA_plasma	0.201	0.653
glycine_serum	-0.304	0.456		cis.urocanate_plasma	-0.184	0.68
pipecolate_serum	-0.303	0.457		N.N.N.trimethyl.alanylproline.betaine..TMAP._plasma	0.181	0.685
glutamate_serum	-0.302	0.46		pyruvate_plasma	0.166	0.711
phenyllactate (PLA)_serum	0.297	0.467		imidazole.lactate_plasma	0.165	0.712
S-methylmethionine_serum	-0.296	0.468		X2.hydroxyphenylacetate_plasma	-0.161	0.719
methylsuccinate_serum	-0.276	0.499		N.monomethylarginine_plasma	-0.153	0.731
cystine_serum	-0.27	0.508		N.acetylarginine_plasma	0.148	0.74
4-hydroxyphenylacetate sulfate_serum	0.268	0.512		indoleacetoylcarnitine._plasma	-0.148	0.741
guanidinosuccinate_serum	0.265	0.516		X2.methylbutyrylglycine..C5._plasma	-0.145	0.746
dimethylarginine (ADMA + SDMA)_serum	0.264	0.518		guanidinoacetate_plasma	-0.145	0.746
tyrosine_serum	0.257	0.529		methylsuccinate_plasma	0.143	0.749
1-carboxyethylleucine_serum	0.251	0.539		indoleacetate_plasma	-0.143	0.75
N-acetyltryptophan_serum	0.249	0.542		X5.oxoproline_plasma	-0.142	0.751
citrate_serum	-0.249	0.542		N.acetyl.3.methylhistidine._plasma	0.135	0.763
N-delta-acetylornithine_serum	0.246	0.546		isocitrate_plasma	0.131	0.77
N-formylmethionine_serum	0.232	0.57		X5.hydroxyindoleacetate_plasma	-0.129	0.773
isobutyrylcarnitine (C4)_serum	0.232	0.571		isobutyrylglycine..C4._plasma	-0.126	0.779
4-imidazoleacetate_serum	0.225	0.582		alanine_plasma	-0.125	0.78
5-hydroxylysine_serum	0.218	0.593		ornithine_plasma	-0.116	0.796
2-hydroxy-3-methylvalerate_serum	0.217	0.595		kynurenate_plasma	-0.109	0.807
catechol glucuronide_serum	0.213	0.602		asparagine_plasma	0.108	0.809
N-acetyl-aspartyl-glutamate (NAAG)_serum	-0.207	0.612		methionine.sulfoxide_plasma	-0.106	0.812
N-acetylasparagine_serum	0.207	0.612		argininosuccinate_plasma	0.1	0.823
hydroxyproline_serum	-0.205	0.615		sarcosine_plasma	0.0984	0.826
kynurenate_serum	-0.199	0.625		X2.methylcitrate.homocitrate_plasma	-0.0981	0.826
N-acetyltyrosine_serum	0.198	0.627		phenylpyruvate_plasma	-0.0978	0.827
hydroxy-N6,N6,N6-trimethyllysine*_serum	-0.197	0.629		N.formylanthranilic.acid_plasma	0.0881	0.844
cysteine_serum	0.196	0.631		methionine_plasma	0.0815	0.855
S-methylglutathione_serum	-0.192	0.638		proline_plasma	-0.0767	0.864
creatine phosphate_serum	-0.189	0.643		indoleacetylglycine_plasma	-0.0749	0.867
arginine_serum	-0.188	0.646		arginine_plasma	0.0731	0.87
4-methoxyphenol sulfate_serum	-0.173	0.671		X3.amino.2.piperidone_plasma	0.0652	0.884
1-methylhistidine_serum	0.166	0.684		vanillactate_plasma	0.061	0.892
N-acetylphenylalanine_serum	-0.158	0.699		cysteine.s.sulfate_plasma	0.0559	0.901
serine_serum	-0.156	0.703		serine_plasma	0.0555	0.901
prolylhydroxyproline_serum	0.151	0.711		isobutyrylcarnitine..C4._plasma	-0.0516	0.908
threonine_serum	0.149	0.716		threonine_plasma	-0.0433	0.923
tryptophan_serum	-0.146	0.72		N.acetylaspartate..NAA._plasma	0.0408	0.927
imidazole lactate_serum	-0.142	0.728		fructosyllysine_plasma	0.0385	0.931
aspartate_serum	0.14	0.732		isovalerylglycine_plasma	-0.0288	0.949
N6,N6,N6-trimethyllysine_serum	0.138	0.734		picolinate_plasma	0.028	0.95
5-oxoproline_serum	-0.126	0.757		lysine_plasma	0.0193	0.966
6-oxopiperidine-2-carboxylate_serum	0.123	0.764		X6.oxopiperidine.2.carboxylate_plasma	-0.0129	0.977
N,N,N-trimethyl-5-aminovalerate_serum	0.117	0.774		cysteine_plasma	0.0104	0.981
N-acetylglutamine_serum	-0.117	0.775
alpha-ketoglutaramate*_serum	0.113	0.783
dimethylglycine_serum	0.104	0.799
N-acetylaspartate (NAA)_serum	-0.103	0.801
taurine_serum	0.0964	0.813
argininosuccinate_serum	0.0937	0.819
N2-acetyl,N6,N6-dimethyllysine_serum	0.0874	0.83
methionine sulfone_serum	-0.0721	0.86
xanthurenate_serum	0.0669	0.87
indoxyl glucuronide_serum	-0.0651	0.873
anthranilate_serum	0.0649	0.874
fructosyllysine_serum	-0.0502	0.902
N-formylphenylalanine_serum	-0.0458	0.911
citrulline_serum	0.04	0.922
2-hydroxyphenylacetate_serum	0.0354	0.931
hypotaurine_serum	-0.0223	0.956
indoleacetate_serum	0.0197	0.961
asparagine_serum	-0.0142	0.972
histidine_serum	0.0112	0.978
3-methoxytyrosine_serum	0.00832	0.984
homoarginine_serum	-0.00584	0.989
homocitrulline_serum	0.00365	0.993

## Sheet: Fig.2B
	isoleucine								leucine								valine								3-methyl-2-oxovalerate								4-methyl-2-oxopentanoate								3-methyl-2-oxobutyrate								2-hydroxy-3-methylvalerate
Pre	1078778880	1012431552	1044844096	946651264	1419888640	1025181696	879181120	851346688	1243094016	1211515648	1224812288	1050792256	1477376384	1146688768	1026879360	955359040	1301332992	1290116992	1260128512	1245202944	1515998464	1246690432	1417699072	1128737664	37801064	30553228	26189752	26581614	43820964	31489152	28587736	37963340	63150068	55714276	43237088	41927152	66742688	54346472	48079032	67281504	23240724	16954160	15031179	16386273	22313144	17135262	20703642	25809536	1155140
Post	766318336	890745216	834864640	769726976	1301490176	956812288	790828096	830187008	905784640	1030900736	992122048	879874112	1338696960	1079553792	932801920	929770944	982266880	1106523008	1208446464	975769088	1449346048	1257321088	1156950912	1086731008	51452544	57447648	43798604	39195296	61644216	49274368	50731992	39651936	89615752	100366840	77869352	63936016	98351856	84770280	86626032	71358032	33217318	30695594	32833780	25421672	42357984	34836300	33924968	23575172	1.03144e+06
1hr Post	799194624	890446592	1088899200	884294848	1217792896	1037832064	839894400	840544960	944789632	1045265728	1304042880	958265088	1189050240	1123372672	975170432	990807360	1096145280	1145394432	1499648000	1142431616	1314476416	1226190464	1247757824	1318043648	32709798	36594208	43543692	33821680	61175920	46023888	46042816	28863190	54519772	58435920	74122320	53784464	92372992	71298616	76193016	50141608	23552220	21893892	26561144	22820708	34932944	25840232	30919336	20027712	975670
[truncated: 47 more columns]

## Sheet: Fig.2D
Time (min)	Vehicle						2-HB
0.25	197	498	227.5	124	104	85	176	143	117	128	353	391
0.5	167	423	208.5	91	116	58.5	146	193	92	80	317	308
0.75	201	428	196.5	66	61	98	90	250	89	41	299	269
1	193	404	187.5	45	116	75	136	297	74	8	300	209
1.25	183	363	172.5	52	140	73.5	219	309	46	0	240	165
1.5	148	294	155.5	54	192	72	261	264	13	63	132	115
1.75	168	270	178.5	24	171	80.5	279	212	9	149	145	89
2	186	226	191	0	113	74	204	186	0	216	163	80
2.25	187	226	182	20	111	72.5	114	160	6	218	134	30
2.5	229	162	132	49	95	68	125	126	0	226	70	13
2.75	180	155	96.5	83	150	27	175	144	24	252	56	43
3	159	139	76.5	56	86	4.5	222	185	84	266	3	0
3.25	96	102	82.5	2	17	28.5	89	182	80	318	0	77
3.5	90	64	116.5	82	0	19	78	114	57	271	53	64
3.75	93	28	130	152	56	0	0	36	98	305	140	98
4	20	0	115.5	284	159	63.5	161	0	85	431	209	119
4.25	21	10	91.5	337	186	117.5	239	146	79	524	251	206
4.5	0	86	64	437	203	160.5	319	340	99	592	288	270
4.75	25	144	41	504	248	171	334	503	79	611	307	444
5	88	149	38	475	267	192.5	383	556	157	660	378	522
5.25	171	141	15.5	466	281	190.5	346	593	232	674	414	640
5.5	246	147	2.5	442	329	156	371	616	284	653	416	736
5.75	343	148	0	456	319	121	370	642	267	611	422	837
6	416	134	4.5	453	397	68	372	672	233	549	395	901
6.25	456	116	-23	448	465	-36	348	669	225	515	373	874
6.5	539	49	-31.5	448	328	-77	278	632	164	526	362	931
6.75	536	-22	-31.5	439	224	-125.5	231	593	89	506	295	996
7	547	-18	-30.5	442	217	-149.5	214	570	70	496	327	967
7.25	628	111	-36.5	439	294	-132	222	521	79	491	333	972
7.5	644	241	-18.5	413	410	-157	188	509	64	480	341	944
7.75	638	316	17.5	442	342	-132	282	465	69	460	361	931
8	588	391	2.5	421	249	-115	274	475	14	460	395	866
8.25	603	442	8.5	400	215	-81.5	211	538	-44	514	397	834
8.5	601	457	78.5	372	252	-40	106	513	-18	476	396	827
8.75	597	515	132	357	297	-29.5	133	454	-43	412	369	738
9	610	540	168	334	376	-43.5	11	443	-74	405	352	595
9.25	540	578	190	254	359	-38	-76	458	-151	396	313	632
9.5	512	555	208	276	272	-27	-117	466	-96	350	275	563
9.75	480	605	225.5	266	189	-21	-229	449	-116	297	216	499
10	453	627	243	315	313	-26.5	-222	429	-108	307	196	468
10.25	473	578	273.5	321	367	-47.5	-157	390	-141	254	164	443
10.5	461	568	303.5	285	253	-68	-171	382	-178	245	155	494
10.75	402	603	320.5	277	235	-67.5	-81	363	-214	217	149	418
11	418	604	334	278	212	-87	-94	323	-240	193	148	365
11.25	325	579	346	306	188	-64.5	-22	308	-302	277	136	397
11.5	292	574	362.5	291	162	-81.5	0	297	-315	262	205	401
11.75	249	564	396	322	225	-124.5	-87	270	-343	334	258	386
12	185	525	400.5	304	220	-127.5	-128	245	-438	383	307	460
12.25	150	529	405	255	152	-109	-67	236	-474	422	292	422
12.5	173	515	429	255	69	-117	-120	190	-490	418	243	419
12.75	216	441	461.5	248	27	-127.5	-193	148	-541	420	246	393
13	219	402	472	297	142	-120.5	-196	134	-579	466	268	388
13.25	257	398	495.5	358	231	-116	-270	111	-584	522	264	356
13.5	299	350	472	409	201	-149	-207	104	-511	512	256	348
13.75	327	344	458	436	98	-126.5	-155	109	-393	545	251	392
14	324	328	437	427	170	-64.5	-174	111	-278	531	213	405
14.25	307	309	424.5	461	318	-37	-48	114	-227	566	208	483
14.5	303	295	421	493	362	18	26	111	-190	615	231	470
14.75	314	267	415.5	505	378	57.5	134	83	-144	592	208	525
15	283	269	394	522	315	90.5	233	42	-93	571	144	500
15.25	326	264	368.5	547	295	117.5	227	36	-123	600	179	478
15.5	269	194	359.5	573	221	141	192	-22	-78	570	152	476
15.75	175	199	350	573	310	179	230	-23	-112	598	164	466
16	175	229	325	568	356	200.5	300	-36	-222	642	187	432
16.25	176	197	317	584	349	202.5	375	-8	-199	610	172	421
16.5	83	208	311	562	253	217	310	31	-228	694	139	443
16.75	113	201	314.5	556	158	223	497	48	-191	771	152	537
17	135	211	302.5	614	215	228	440	110	-294	724	167	563
17.25	203	240	294.5	601	333	236	512	117	-250	718	158	553
17.5	199	200	294.5	595	320	258.5	508	136	-248	720	184	582
17.75	205	192	301.5	608	329	292.5	501	151	-291	748	225	548
18	233	189	290	597	268	305	672	123	-288	760	238	542
18.25	204	133	316	601	282	322	616	152	-271	750	293	496
18.5	190	92	316	657	403	336.5	688	110	-231	785	276	354
18.75	166	81	315	669	444	343	732	107	-245	793	253	356
19	109	69	302	649	522	335	665	113	-219	776	301	270
19.25	122	39	310.5	653	436	334.5	582	99	-132	842	309	236
19.5	65	-24	305.5	590	295	329	703	82	-46	820	367	269
19.75	56	-39	310	580	305	328	688	77	68	720	434	253
20	102	-80	305	570	288	335	712	63	157	791	423	252
20.25	131	-78	320.5	577	369	336.5	732	99	244	769	449	242
20.5	128	-75	346.5	563	335	354	765	153	334	755	425	161
20.75	52	-86	322.5	591	405	356	646	273	333	744	380	258
21	56	-77	319	557	361	359.5	715	417	248	771	384	299
21.25	75	-101	353	566	224	457	672	541	257	776	353	366
21.5	149	-129	365	558	165	533.5	675	611	265	761	367	480
21.75	217	-133	358.5	570	149	571.5	826	621	466	818	364	442
22	248	-71	355	610	241	527.5	846	587	588	826	379	481
22.25	294	-25	358	494	324	548	846	554	700	856	371	484
22.5	255	26	359.5	470	293	543	689	555	709	871	353	411
22.75	265	37	366.5	375	358	526	791	514	693	911	294	371
23	329	46	364	364	250	512	781	533	667	877	347	412
23.25	410	69	366	396	275	527.5	782	533	672	854	329	449
23.5	465	66	367.5	410	323	515.5	679	526	597	877	341	401
23.75	454	44	371	416	76	548	734	503	624	905	369	406
24	484	108	386	440	11	562	797	520	580	923	434	332
24.25	531	151	408	420	47	562.5	757	579	634	972	508	397
24.5	604	117	418.5	382	113	528	742	619	558	964	516	428
24.75	604	70	421	397	105	518	792	701	616	983	489	470
25	551	43	424.5	362	108	493	816	761	639	989	534	472
25.25	455	47	432.5	422	-20	490.5	866	834	632	964	526	471
25.5	472	74	432	429	5	473.5	819	877	620	891	626	398
25.75	525	122	423.5	438	125	446.5	819	937	657	923	642	425
26	534	122	423.5	378	50	471.5	816	945	590	934	643	482
26.25	462	131	427	391	-96	511	808	983	657	949	602	511
26.5	394	81	422.5	468	-30	516	809	1040	719	932	585	535
26.75	399	63	427.5	430	-61	555.5	804	1073	680	968	551	488
27	469	-4	427.5	507	-121	566.5	852	1100	700	956	591	489
27.25	476	-11	426.5	455	-114	589	886	1103	672	968	618	412
27.5	479	-4	435	424	9	610	833	1135	690	964	688	433
27.75	481	-2	427	396	58	569.5	813	1189	653	944	714	501
28	496	47	453	427	22	510	767	1247	699	775	738	528
28.25	567	43	440	429	151	458.5	768	1241	608	653	700	519
28.5	582	41	426	372	26	457	787	1244	677	633	716	461
28.75	550	55	419	405	41	479.5	785	1238	721	596	665	466
29	478	31	429.5	407	13	518.5	818	1287	758	579	668	451
29.25	477	-8	434.5	450	64	506.5	787	1318	792	636	646	472
29.5	407	-3	438	512	156	511.5	778	1299	790	717	596	445
29.75	331	5	461.5	453	157	560	788	1315	721	736	623	422
30	343	-40	447	449	37	566	703	1305	700	698	631	478
30.25	395	23	445.5	477	42	555.5	745	1315	693	698	620	478
30.5	397	84	473.5	431	11	517	731	1320	668	784	643	516
30.75	341	137	478.5	444	-50	536	751	1321	734	748	613	513
31	401	209	473.5	430	-94	523.5	799	1331	739	693	578	485
31.25	345	287	475.5	382	-71	527.5	752	1336	794	727	574	366
31.5	366	287	494	404	60	533.5	711	1350	761	723	609	267
31.75	395	314	512.5	348	96	534	603	1347	779	739	622	267
32	390	347	503	264	101	519.5	640	1331	765	783	647	261
32.25	349	394	501.5	283	85	503.5	589	1318	749	763	625	280
32.5	287	401	502	324	34	470.5	745	1302	811	755	590	198
32.75	271	392	476	380	65	434.5	595	1303	763	739	614	140
33	333	401	432.5	362	-49	408.5	549	1299	692	690	628	136
33.25	391	404	412.5	359	-87	383.5	532	1326	602	495	602	131
33.5	460	459	422.5	355	-263	371	498	1329	602	292	588	127
33.75	438	452	422	371	-296	370	495	1258	636	308	647	160
34	365	447	398.5	317	-244	349	450	1256	642	366	657	92
34.25	303	430	430	289	-60	300.5	492	1305	627	345	566	71
34.5	315	392	432.5	314	-116	294	526	1323	624	417	619	96
34.75	297	368	436	354	-97	302.5	520	1309	601	451	647	135
35	281	336	436	409	-124	320	556	1283	581	516	643	202
35.25	337	316	413	393	26	305	684	1224	621	591	605	259
35.5	321	271	434	394	104	301	704	1216	670	668	593	354
35.75	288	301	416.5	385	83	283.5	687	1217	640	703	472	432
36	350	285	430	323	68	297.5	526	1193	585	554	438	512
36.25	357	275	440.5	336	-21	319.5	552	1230	585	417	467	521
36.5	403	216	442	331	-42	338.5	545	1248	595	448	502	376
36.75	424	239	465	296	-36	331	450	1223	585	500	593	338
37	465	280	474	324	-39	325.5	480	1204	589	590	631	353
37.25	408	285	471	336	-93	390	585	1224	590	625	668	446
37.5	413	251	459.5	291	-46	433	580	1184	563	599	639	506
37.75	400	220	469	277	80	375	591	1027	557	595	643	544
38	325	219	471	280	120	399	552	919	545	661	653	528
38.25	339	215	467	343	99	389.5	455	886	593	615	674	599
38.5	339	203	474	309	79	400	582	952	597	602	605	578
38.75	413	281	479.5	224	76	420.5	573	971	622	662	653	587
39	485	289	470	216	-6	446.5	609	987	696	687	674	581
39.25	485	278	472	274	-148	516	583	1005	702	679	693	519
39.5	482	288	472	306	-131	522.5	335	1072	676	590	663	541
39.75	440	276	470	324	-97	496.5	452	1077	612	512	705	540
40	442	272	471	302	-121	460.5	491	1062	611	441	624	545
40.25	432	297	494.5	321	-69	454.5	233	1009	629	338	602	618
40.5	414	327	487.5	311	-70	511	243	996	629	296	623	646
40.75	426	286	502.5	295	-22	456.5	377	987	594	339	633	641
41	488	249	495	267	47	460.5	428	932	566	397	655	659
41.25	432	218	467.5	340	-4	461.5	318	929	627	480	606	695
41.5	411	257	465.5	304	-44	491.5	196	943	631	494	576	620
41.75	465	285	463.5	247	-2	453	223	975	626	501	560	611
42	478	278	470	247	-14	454.5	186	1001	610	651	597	558

## Sheet: Fig.2E
Time (min)	Vehicle						2-HB
0.25	0.823	0.852	0.812	0.765	0.816	0.812	0.777	0.745	0.758	0.77	0.776	0.719
0.5	0.824	0.855	0.81	0.772	0.815	0.816	0.783	0.744	0.762	0.778	0.775	0.732
0.75	0.816	0.85	0.804	0.776	0.827	0.804	0.792	0.74	0.766	0.784	0.768	0.732
1	0.819	0.849	0.802	0.781	0.818	0.812	0.786	0.736	0.773	0.786	0.76	0.736
1.25	0.818	0.847	0.801	0.778	0.814	0.812	0.778	0.74	0.773	0.788	0.766	0.737
1.5	0.823	0.852	0.803	0.775	0.806	0.809	0.779	0.749	0.774	0.782	0.779	0.738
1.75	0.819	0.854	0.797	0.774	0.808	0.803	0.777	0.755	0.771	0.777	0.771	0.734
2	0.82	0.857	0.798	0.77	0.819	0.798	0.786	0.754	0.768	0.777	0.762	0.732
2.25	0.824	0.849	0.8	0.756	0.822	0.797	0.797	0.758	0.767	0.783	0.758	0.741
2.5	0.821	0.849	0.81	0.751	0.823	0.797	0.794	0.761	0.773	0.788	0.759	0.748
2.75	0.836	0.837	0.814	0.748	0.81	0.811	0.782	0.755	0.769	0.791	0.751	0.747
3	0.842	0.83	0.815	0.751	0.813	0.815	0.773	0.75	0.754	0.792	0.757	0.758
3.25	0.851	0.824	0.811	0.759	0.818	0.805	0.791	0.75	0.753	0.787	0.759	0.74
3.5	0.851	0.824	0.803	0.751	0.819	0.804	0.788	0.756	0.756	0.794	0.753	0.741
3.75	0.844	0.825	0.8	0.75	0.814	0.809	0.798	0.759	0.752	0.795	0.744	0.733
4	0.85	0.822	0.805	0.743	0.806	0.799	0.778	0.763	0.757	0.793	0.739	0.729
4.25	0.845	0.818	0.81	0.75	0.808	0.801	0.777	0.75	0.761	0.8	0.741	0.723
4.5	0.847	0.807	0.816	0.751	0.813	0.8	0.779	0.743	0.759	0.806	0.744	0.73
4.75	0.849	0.802	0.818	0.751	0.811	0.81	0.786	0.741	0.764	0.816	0.749	0.728
5	0.849	0.804	0.814	0.763	0.811	0.809	0.786	0.76	0.757	0.815	0.745	0.745
5.25	0.85	0.809	0.815	0.767	0.81	0.809	0.801	0.766	0.756	0.815	0.744	0.746
5.5	0.856	0.808	0.815	0.774	0.802	0.814	0.799	0.769	0.758	0.818	0.748	0.752
5.75	0.858	0.809	0.81	0.771	0.803	0.815	0.795	0.77	0.768	0.826	0.747	0.755
6	0.86	0.816	0.805	0.768	0.792	0.817	0.788	0.769	0.776	0.836	0.753	0.758
6.25	0.867	0.814	0.812	0.767	0.783	0.835	0.78	0.768	0.769	0.838	0.758	0.772
6.5	0.871	0.824	0.812	0.764	0.805	0.833	0.782	0.774	0.773	0.829	0.76	0.771
6.75	0.882	0.834	0.806	0.761	0.819	0.836	0.783	0.779	0.785	0.825	0.768	0.764
7	0.886	0.833	0.804	0.758	0.822	0.833	0.78	0.779	0.781	0.816	0.761	0.771
7.25	0.881	0.821	0.804	0.758	0.808	0.817	0.777	0.782	0.779	0.806	0.763	0.773
7.5	0.883	0.815	0.804	0.762	0.79	0.819	0.781	0.776	0.779	0.8	0.768	0.779
7.75	0.885	0.82	0.808	0.757	0.801	0.811	0.768	0.777	0.778	0.797	0.77	0.782
8	0.892	0.826	0.816	0.761	0.813	0.809	0.77	0.775	0.785	0.793	0.768	0.79
8.25	0.889	0.831	0.815	0.761	0.817	0.802	0.779	0.768	0.792	0.782	0.772	0.794
8.5	0.887	0.833	0.804	0.763	0.809	0.793	0.792	0.773	0.784	0.785	0.773	0.786
8.75	0.886	0.832	0.801	0.763	0.799	0.796	0.782	0.779	0.783	0.791	0.775	0.788
9	0.882	0.835	0.806	0.761	0.785	0.81	0.79	0.774	0.781	0.791	0.775	0.803
9.25	0.89	0.834	0.816	0.768	0.783	0.812	0.79	0.771	0.789	0.792	0.777	0.786
9.5	0.888	0.84	0.821	0.761	0.791	0.808	0.783	0.773	0.773	0.795	0.78	0.789
9.75	0.885	0.835	0.828	0.758	0.801	0.806	0.788	0.782	0.773	0.797	0.788	0.795
10	0.884	0.841	0.831	0.749	0.781	0.806	0.783	0.786	0.771	0.789	0.789	0.793
10.25	0.876	0.853	0.827	0.748	0.772	0.812	0.778	0.789	0.777	0.79	0.787	0.794
10.5	0.873	0.855	0.824	0.753	0.787	0.815	0.788	0.784	0.778	0.786	0.788	0.781
10.75	0.88	0.853	0.827	0.757	0.788	0.811	0.784	0.781	0.78	0.788	0.788	0.789
11	0.875	0.852	0.829	0.761	0.788	0.815	0.793	0.78	0.778	0.795	0.788	0.798
11.25	0.885	0.853	0.828	0.757	0.789	0.804	0.784	0.777	0.782	0.794	0.796	0.796
11.5	0.884	0.851	0.827	0.759	0.789	0.802	0.779	0.775	0.777	0.809	0.792	0.797
11.75	0.88	0.849	0.821	0.757	0.773	0.815	0.793	0.773	0.776	0.816	0.797	0.8
12	0.884	0.845	0.825	0.763	0.775	0.811	0.797	0.773	0.781	0.823	0.798	0.791
12.25	0.877	0.832	0.83	0.773	0.782	0.802	0.784	0.772	0.781	0.833	0.807	0.801
12.5	0.864	0.828	0.832	0.775	0.794	0.805	0.787	0.774	0.773	0.849	0.822	0.803
12.75	0.856	0.836	0.861	0.774	0.8	0.808	0.792	0.778	0.775	0.862	0.824	0.809
13	0.856	0.834	0.8667	0.768	0.784	0.804	0.788	0.777	0.774	0.864	0.823	0.809
13.25	0.851	0.826	0.8586	0.763	0.772	0.803	0.799	0.776	0.776	0.859	0.823	0.812
13.5	0.85	0.825	0.861	0.763	0.78	0.815	0.789	0.769	0.77	0.865	0.828	0.812
13.75	0.852	0.82	0.8534	0.765	0.796	0.813	0.782	0.771	0.763	0.864	0.833	0.81
14	0.858	0.817	0.8465	0.774	0.785	0.803	0.798	0.775	0.758	0.868	0.843	0.81
14.25	0.861	0.816	0.8595	0.775	0.763	0.811	0.794	0.778	0.761	0.86	0.844	0.8
14.5	0.865	0.811	0.8667	0.78	0.759	0.814	0.801	0.778	0.766	0.856	0.839	0.81
14.75	0.865	0.81	0.8694	0.787	0.76	0.819	0.803	0.781	0.767	0.862	0.842	0.807
15	0.867	0.808	0.8669	0.789	0.77	0.825	0.807	0.785	0.763	0.866	0.855	0.815
15.25	0.859	0.805	0.876	0.793	0.776	0.829	0.823	0.778	0.774	0.857	0.849	0.821
15.5	0.863	0.814	0.8779	0.798	0.791	0.832	0.837	0.784	0.767	0.86	0.855	0.824
15.75	0.87	0.81	0.8715	0.808	0.784	0.827	0.837	0.778	0.771	0.853	0.853	0.827
16	0.862	0.803	0.8728	0.815	0.78	0.825	0.827	0.777	0.783	0.844	0.851	0.835
16.25	0.853	0.804	0.8825	0.819	0.78	0.827	0.814	0.768	0.774	0.847	0.858	0.835
16.5	0.861	0.8	0.8861	0.828	0.793	0.827	0.826	0.765	0.779	0.832	0.865	0.832
16.75	0.85	0.798	0.8834	0.833	0.805	0.823	0.802	0.769	0.765	0.826	0.861	0.827
17	0.84	0.799	0.8786	0.829	0.794	0.819	0.811	0.763	0.783	0.837	0.858	0.835
17.25	0.827	0.795	0.8769	0.836	0.773	0.819	0.801	0.77	0.775	0.839	0.858	0.85
17.5	0.828	0.8	0.8861	0.842	0.77	0.813	0.803	0.774	0.774	0.842	0.856	0.856
17.75	0.828	0.799	0.8782	0.846	0.768	0.806	0.808	0.779	0.778	0.843	0.849	0.871
18	0.824	0.801	0.8791	0.851	0.778	0.803	0.79	0.789	0.776	0.841	0.843	0.879
18.25	0.831	0.809	0.8704	0.852	0.778	0.802	0.804	0.783	0.772	0.846	0.835	0.889
18.5	0.828	0.812	0.8824	0.844	0.765	0.805	0.8	0.789	0.77	0.843	0.839	0.912
18.75	0.826	0.811	0.8907	0.843	0.762	0.811	0.8	0.786	0.774	0.842	0.846	0.902
19	0.833	0.813	0.8913	0.845	0.752	0.82	0.815	0.782	0.778	0.845	0.838	0.908
19.25	0.824	0.813	0.8909	0.843	0.77	0.825	0.83	0.799	0.776	0.837	0.837	0.902
19.5	0.829	0.82	0.8948	0.851	0.791	0.833	0.815	0.809	0.775	0.84	0.829	0.89
19.75	0.827	0.816	0.894	0.849	0.788	0.84	0.817	0.8135	0.776	0.857	0.821	0.886
20	0.816	0.822	0.916	0.846	0.785	0.839	0.815	0.8068	0.784	0.845	0.828	0.877
20.25	0.812	0.819	0.907	0.837	0.767	0.839	0.812	0.8122	0.786	0.849	0.83	0.872
20.5	0.811	0.817	0.897	0.834	0.766	0.837	0.808	0.8199	0.784	0.85	0.838	0.88
20.75	0.821	0.816	0.905	0.823	0.752	0.835	0.832	0.8227	0.795	0.85	0.848	0.854
21	0.816	0.81	0.906	0.824	0.757	0.832	0.82	0.8272	0.817	0.841	0.844	0.843
21.25	0.816	0.809	0.896	0.819	0.774	0.801	0.827	0.8208	0.8115	0.835	0.847	0.836
21.5	0.813	0.811	0.895	0.821	0.78	0.779	0.828	0.8256	0.8171	0.834	0.84	0.822
21.75	0.807	0.81	0.9	0.82	0.781	0.769	0.81	0.8264	0.8188	0.823	0.838	0.836
22	0.808	0.807	0.9	0.816	0.768	0.78	0.811	0.8219	0.8148	0.822	0.835	0.832
22.25	0.806	0.858	0.898	0.835	0.754	0.775	0.815	0.8182	0.8116	0.816	0.834	0.838
22.5	0.816	0.8583	0.895	0.833	0.756	0.776	0.838	0.8164	0.8106	0.813	0.836	0.853
22.75	0.824	0.8585	0.889	0.842	0.747	0.782	0.823	0.8148	0.8101	0.808	0.844	0.857
23	0.822	0.8678	0.888	0.835	0.761	0.785	0.823	0.8231	0.819	0.813	0.831	0.847
23.25	0.819	0.8621	0.882	0.823	0.757	0.779	0.819	0.8165	0.8127	0.818	0.83	0.838
23.5	0.828	0.859	0.873	0.813	0.747	0.783	0.831	0.8134	0.8094	0.818	0.826	0.844
23.75	0.839	0.8575	0.869	0.81	0.78	0.774	0.821	0.812	0.8079	0.813	0.823	0.84
24	0.842	0.8583	0.862	0.808	0.786	0.768	0.81	0.8129	0.8086	0.81	0.812	0.849
24.25	0.842	0.8607	0.854	0.813	0.77	0.767	0.813	0.8159	0.8111	0.805	0.805	0.828
24.5	0.833	0.8596	0.848	0.818	0.758	0.775	0.813	0.8153	0.8103	0.811	0.807	0.818
24.75	0.836	0.8578	0.843	0.812	0.759	0.776	0.803	0.886	0.8084	0.81	0.812	0.812
25	0.842	0.8556	0.844	0.817	0.762	0.779	0.799	0.876	0.8059	0.814	0.807	0.811
25.25	0.854	0.8565	0.841	0.807	0.786	0.777	0.791	0.866	0.8067	0.82	0.809	0.814
25.5	0.848	0.8634	0.84	0.806	0.784	0.776	0.796	0.865	0.8139	0.832	0.795	0.829
25.75	0.835	0.8681	0.843	0.803	0.764	0.78	0.796	0.852	0.8189	0.826	0.797	0.825
26	0.83	0.8766	0.842	0.808	0.77	0.77	0.792	0.851	0.8275	0.826	0.8	0.816
26.25	0.836	0.8719	0.84	0.804	0.785	0.757	0.79	0.848	0.8232	0.827	0.811	0.814
26.5	0.838	0.8839	0.839	0.79	0.765	0.757	0.787	0.84	0.8355	0.829	0.813	0.816
26.75	0.831	0.8816	0.836	0.795	0.768	0.752	0.784	0.836	0.8339	0.823	0.816	0.829
27	0.816	0.8757	0.835	0.783	0.78	0.755	0.776	0.835	0.8285	0.826	0.809	0.83
27.25	0.817	0.875	0.833	0.787	0.778	0.753	0.768	0.836	0.8282	0.824	0.805	0.84
27.5	0.818	0.8816	0.83	0.791	0.756	0.751	0.772	0.835	0.8353	0.826	0.793	0.835
27.75	0.815	0.884	0.834	0.794	0.748	0.762	0.772	0.83	0.8381	0.83	0.789	0.825
28	0.808	0.8898	0.831	0.784	0.756	0.776	0.777	0.823	0.8444	0.852	0.786	0.824
28.25	0.799	0.8773	0.836	0.783	0.741	0.784	0.775	0.828	0.8326	0.861	0.791	0.828
28.5	0.803	0.8786	0.841	0.792	0.761	0.779	0.768	0.832	0.8342	0.855	0.786	0.839
28.75	0.811	0.8817	0.84	0.787	0.761	0.766	0.767	0.834	0.8376	0.853	0.791	0.836
29	0.824	0.932	0.838	0.788	0.766	0.754	0.761	0.83	0.8358	0.848	0.787	0.835
29.25	0.819	0.931	0.837	0.784	0.753	0.757	0.763	0.829	0.8326	0.832	0.789	0.829
29.5	0.827	0.916	0.835	0.777	0.735	0.756	0.764	0.833	0.8235	0.814	0.795	0.828
29.75	0.835	0.901	0.838	0.788	0.732	0.745	0.764	0.829	0.82	0.81	0.785	0.829
30	0.828	0.902	0.845	0.789	0.749	0.743	0.774	0.829	0.8231	0.814	0.78	0.816
30.25	0.816	0.886	0.837	0.785	0.749	0.743	0.767	0.826	0.8221	0.812	0.777	0.814
30.5	0.812	0.878	0.828	0.793	0.752	0.751	0.77	0.824	0.8152	0.801	0.773	0.809
30.75	0.818	0.875	0.829	0.792	0.756	0.745	0.768	0.824	0.8125	0.808	0.78	0.808
31	0.805	0.868	0.831	0.791	0.754	0.747	0.762	0.821	0.8221	0.817	0.785	0.81
31.25	0.811	0.864	0.829	0.796	0.743	0.744	0.769	0.821	0.8108	0.809	0.783	0.823
31.5	0.809	0.867	0.827	0.791	0.721	0.744	0.773	0.819	0.7998	0.81	0.776	0.832
31.75	0.806	0.867	0.823	0.796	0.714	0.745	0.786	0.819	0.88	0.805	0.774	0.827
32	0.809	0.861	0.823	0.801	0.71	0.749	0.781	0.821	0.876	0.797	0.77	0.828
32.25	0.817	0.855	0.825	0.791	0.709	0.752	0.787	0.823	0.873	0.8	0.769	0.821
32.5	0.823	0.852	0.83	0.784	0.711	0.756	0.765	0.823	0.858	0.803	0.772	0.834
32.75	0.824	0.853	0.846	0.776	0.699	0.763	0.785	0.822	0.861	0.804	0.768	0.838
33	0.818	0.848	0.854	0.78	0.706	0.764	0.79	0.821	0.867	0.808	0.767	0.829
33.25	0.814	0.847	0.856	0.782	0.702	0.763	0.792	0.816	0.871	0.828	0.77	0.823
33.5	0.808	0.839	0.844	0.785	0.724	0.758	0.796	0.818	0.862	0.837	0.772	0.818
33.75	0.817	0.839	0.84	0.78	0.732	0.749	0.795	0.829	0.848	0.823	0.763	0.804
34	0.829	0.838	0.841	0.784	0.73	0.743	0.802	0.829	0.842	0.809	0.764	0.807
34.25	0.835	0.835	0.825	0.785	0.713	0.742	0.795	0.821	0.839	0.808	0.778	0.804
34.5	0.827	0.835	0.822	0.779	0.735	0.735	0.789	0.819	0.831	0.793	0.77	0.794
34.75	0.828	0.832	0.818	0.774	0.744	0.73	0.789	0.819	0.829	0.785	0.765	0.79
35	0.831	0.829	0.815	0.767	0.753	0.725	0.782	0.822	0.825	0.777	0.764	0.784
35.25	0.823	0.827	0.822	0.77	0.735	0.729	0.764	0.83	0.817	0.77	0.766	0.779
35.5	0.824	0.829	0.811	0.772	0.727	0.729	0.763	0.828	0.807	0.762	0.763	0.768
35.75	0.829	0.821	0.813	0.772	0.731	0.734	0.762	0.824	0.809	0.76	0.771	0.759
36	0.821	0.822	0.808	0.778	0.733	0.724	0.777	0.825	0.815	0.78	0.771	0.753
36.25	0.82	0.818	0.804	0.772	0.746	0.716	0.773	0.82	0.809	0.794	0.765	0.756
36.5	0.815	0.823	0.805	0.769	0.748	0.706	0.773	0.822	0.802	0.785	0.76	0.779
36.75	0.814	0.811	0.803	0.774	0.746	0.705	0.79	0.825	0.8	0.778	0.744	0.781
37	0.806	0.802	0.803	0.771	0.744	0.708	0.788	0.823	0.798	0.77	0.74	0.777
37.25	0.816	0.795	0.807	0.769	0.749	0.7	0.773	0.819	0.794	0.772	0.739	0.763
37.5	0.816	0.799	0.813	0.776	0.742	0.698	0.774	0.825	0.791	0.786	0.744	0.756
37.75	0.812	0.801	0.809	0.774	0.721	0.716	0.775	0.845	0.789	0.789	0.745	0.758
38	0.819	0.8	0.808	0.773	0.716	0.711	0.783	0.849	0.788	0.78	0.743	0.763
38.25	0.812	0.798	0.81	0.762	0.72	0.717	0.793	0.843	0.782	0.789	0.738	0.754
38.5	0.81	0.801	0.81	0.765	0.722	0.718	0.774	0.823	0.782	0.79	0.746	0.76
38.75	0.799	0.793	0.806	0.776	0.72	0.716	0.774	0.812	0.779	0.784	0.741	0.763
39	0.789	0.798	0.807	0.772	0.729	0.713	0.766	0.803	0.768	0.786	0.738	0.768
39.25	0.791	0.804	0.805	0.764	0.748	0.708	0.769	0.798	0.77	0.788	0.734	0.779
39.5	0.794	0.805	0.806	0.756	0.746	0.717	0.801	0.787	0.777	0.802	0.737	0.776
39.75	0.798	0.806	0.811	0.751	0.741	0.728	0.78	0.785	0.786	0.807	0.729	0.777
40	0.795	0.809	0.812	0.752	0.745	0.738	0.772	0.787	0.784	0.809	0.739	0.776
40.25	0.797	0.803	0.805	0.748	0.737	0.736	0.806	0.791	0.781	0.816	0.738	0.767
40.5	0.8	0.798	0.806	0.75	0.736	0.718	0.8	0.789	0.778	0.807	0.732	0.77
40.75	0.797	0.805	0.804	0.752	0.729	0.727	0.774	0.789	0.781	0.784	0.727	0.775
41	0.788	0.808	0.808	0.755	0.719	0.722	0.765	0.794	0.783	0.776	0.724	0.774
41.25	0.798	0.81	0.817	0.745	0.723	0.718	0.777	0.788	0.776	0.767	0.731	0.772
41.5	0.801	0.8	0.815	0.752	0.725	0.708	0.792	0.785	0.778	0.77	0.73	0.786
41.75	0.792	0.794	0.811	0.757	0.718	0.716	0.784	0.778	0.779	0.775	0.729	0.786
42	0.791	0.796	0.808		0.716	0.715	0.787	0.776	0.783	0.761	0.721	0.789

## Sheet: Fig.2F
	Sedentary						Runners
Vehicle	4405.96	4057.29	3863.17	5040.88	4339.33	4407.75	4526.67	3976.67	4051.67	4912.67	5196.33	5246.67
2HB	4947	4475.75	4109.17	5046.88	4960.96	4551.79	5155.67	3740	4477	4588.33	4744.67	4095.67

## Sheet: Fig.2G
Vehicle	2-HB
323.597	490.069
173.272	710.708
411.776	383.003
408.039	660.856
82.3389	459.975
353.962	400.206

## Sheet: Fig.2H_Metabolite Data
PARENT_SAMPLE_NAME	30	35	49	50	55	62	71	92	93	98	111	112	132	136	171	179	180	181	182	189	192	194	197	203	209	212	213	215	218	219	229	231	232	234	240	241	244	249	250	252	254	266	267	272	275	279	282	291	297
UCAM-55652	3619595	6890397	2723932	12930176	7577359	5444270	878861	10359810	317669896	2760009	54480578	127521927	5793062	5495044	45169744	1609228	6766097281	63245902	1883479	103568430	894952	5694888		9969809	751555	11949899	81690			1613910	1509269931	310452116	511900	225226454	39100007	1125443	44264054	12468940	8072065	3129665853	63506352	199549759	79989728	4724000	363908768	1567303	895602	3283850	7411650
UCAM-55653	2467326	2827966	1429463	4860116	6551664	2589218	579172	3926297	104811875	1167213	25233099	62001276	11060666	1718571	43612340		4001731021	30805111	334158	84696346	413961	3950756	65865	2185482	691728	6575740			207497	695265	833566410	261477224	401870	188900654	14262439		27302968	16943304	5969058	2054773773	43094610	111601992	96687186	3912147	275511957	3029929	927318	6732249	11165317
UCAM-55654	2914810	5572387	2052699	9964024	8266300	4200520	482204	15574370	363263896	2933220	75079678	154145251	5905814	1620401	59544558	2701302	7823813763	88046913	3904214	116646375	1032384	5892958	127256	9159200	915570	15733871	76121	66320		1802852	1898417286	1464259609	2702319	117252157	46822327	578834	22311425	16390473	8929253	3442263159	203870295	133386655	56852935	11235364	467823535	1865219	773800	1960103	10023904
UCAM-55655	1819413	4601098	494823	1991757	4994629	3572351	363542	2822756	115231932	432874	17855095	36884172	3888973	458341	18612826	2271106	4842294575	56601630	587679	47629359	195846	1882161		1925901	412532	4385234				898063	806584404	70913574		116915251	9376455	277100	13536151	3947737	4533698	2017058521	68845664	77624724	44037848	5070216	193154101	437006	384824	3140799	5573050
UCAM-55656	3787628	5369917	3145406	24348529	4339173	7267819	665985	17182682	289731952	5125186	56441146	198272985	4160161	312881	90628241	4764928	8706023511	166119258	1651688	106160768	1311246	9910321	133752	11629479	1259459	24210043	127555			1986876	1805901423	1112882239	1833365	204847289	58140739	679481	48744492	24244409	9867019	3141311092	316356598	203457842	90604866	12633763	456673821	2130734	1144262	1610408	12568016
UCAM-55657	3990685	5264624	3036364	19142612	6659695	4255623	863341	10461608	207790705	2281637	46931936	126505479	13190503	1193357	99272331	2267813	4916118532	87893910	952371	129361340	1009948	5237195	122183	11152537	1316978	29194531	75680		394775	2657227	1161691651	563991554	1387884	334954358	33614286	910916	41889481	46192991	9881271	3234153831	95089386	163717948	138225515	7041722	518364382	2155064	2456855	4284000	20517465
UCAM-55658	4305991	9673275	2140920	14678221	7362773	2344268	632164	12481762	326482507	3994411	121531822	144757140	3403034	1110973	70040002	2844615	5439839719	83908806	3484748	88000489	1340807	7176806	343465	12317362	1259994	19077792	117455	47572	627182	6944584	1296079326	924777853	869269	243823012	28530099	602075	36162342	20096690	8104639	2712624538	339168992	154824911	79676603	8252223	427300984	2921531	1765610	1415282	6978042
UCAM-55659	2324502	6329746	2696655	12635324	9541480	7036252	379671	5832632	196705809	979910	42504156	94460452	1876348	393604	91588947	3734403	7107794836	130654535	721530	78765824	800147	6097427	2920534	8739563	1027171	14860925	74095		394054	7046598	1254981597	1395161080	1468548	133675141	50523730	385210	28431837	8595056	9457751	3460168806	97213909	217955036	66203241	7594160	299773863	1098569	1481569	2126543	8627678
UCAM-55660	4615276	5708672	4408712	22694679	6564245	6188220	493320	9399209	124482285	3900381	101537961	203425025	14772800	1754310	57832835	2919648	8075582906	111273154	1652598	124934641	833990	7094692	73875	11590830	1333681	28481763	74681		437242	4395492	1666857287	1001486483	2649050	185387539	54978179	468682	49139674	46197901	10631459	3358429194	229063921	197818247	134747161	10817265	569786145	3585060	3023910	2929459	14685519
UCAM-55661	4696666	4677517	3415635	23384196	8367878	11253404	463007	9687119	278225742	2408229	43454484	195915273	5524332	3953309	55864926	5361524	12577612428	159179518	972123	92919455	989679	7689836	68273	11261034	916698	26160436	74482	92085	483189	4502375	1636803637	1414046757	2020119	210897263	42230028	594698	55017492	33097039	8599288	3386661644	194483600	202075133	115635335	3530636	450709731	2933322	1924223	4032928	10046740
UCAM-55662	2131694	3635254	2966007	17282668	5755274	5049456	471187	16970863	300338898	5454432	63454686	182971432	1730440	1750190	84274965	3022203	6658140465	68055513	1803878	83793300	797141	7647717	4299735	12211167	1394434	14126194	117979			5516745	1176819749	1190970040	1471417	113643785	72632870	694743	35811549	13891207	8141962	3430797007	262760598	193212219	50425714	10897564	389499595	1537840	644241	2233756	4742270
UCAM-55663	1747238	6201450	2032700	12054092	9253328	4126355	412213	5352529	114170837	1443808	54548361	126025846	7781813	1702639	58227106	2185757	6919110462	75437057	799472	102220190	680696	4461106	385750	9159005	947065	23985545	59124	362243	504726	7348420	1526153093	1062412944	1831140	148305143	47025090	904059	26787815	34564271	8500095	3349189151	145921367	209380930	87462601	6529491	362090353	807394	1953774	2949687	9786463
UCAM-55664	3536200	5520146	2477703	15999576	5040925	3309569	486321	14075860	323594816	4532893	56836029	126523885	3984470	663549	83326017	1936895	5683790754	56181840	1462589	86143568	787376	6956094	2079054	9950391	1132679	21517579	96760		617025	5624918	1707437054	1584923015	1344788	215294533	54060185	647092	35583276	19287845	8396981	3129327251	82291460	207987840	86727848	9941760	430198699	3930503	1583961	2789111	9011131
UCAM-55665	2246562	4430529	2142793	9395559	8599629	3174878	485412	9364501	218218232	2449249	47954303	107258272	1955172	1260487	79867429	1680173	4765299418	83434457	682345	76999998	625629	5644702	2673830	6796680	930345	19178488	74498	156496	450679	6529612	1049123509	1363694858	2400024	184529534	45136135	703303	11873408	13469289	10229598	3527918564	69029080	241665111	83358266	6422878	341153048	1221242	1188557	3708010	9333944
UCAM-55666	4467591	5796634	2606911	13384759	10592443	3378265	404009	13357226	327168491	4590153	76817536	148682973	5660567	161753	76227146	1751220	3960171640	60202557	1470267	84811706	848590	7250530	1237916	8355814	1185183	26350228	76123		534377	9273016	904315523	1241382236	1757758	167274034	66266713	756238	39073044	34824768	8763773	3006539965	96095302	220805175	103365343	10669859	439104818	2184719	2434682	3365640	15931045
UCAM-55667	2520039	6871697	2223530	8753295	8112618	10901030	278254	5567218	152724952	1589333	28542065	113377941	3930463	4263445	67449636	1699563	6532050111	70850400	618934	80095390	680054	5819966	867932	7633882	1303735	16089443	74672	45081	459515	12927859	1173710262	853334553	868141	131195447	30106415	561654	30885022	16042436	9679044	2990330555	136374591	245548327	80776482	5146128	321436328		1784775	2774557	7222728
UCAM-55668	3471937	6324304	2818018	14981489	4538686	6150843	687440	13176994	238671385	5881963	61205536	162686281	5139451	592919	72922393	3171946	8587802909	106774582	2523532	95944736	1315912	9131791		10363407	1407217	23796762	131983	97727	605218	2751092	1533541368	478007827	913792	175413135	61873186	1113724	50954581	35534331	8391139	3157593925	242697623	176357495	102962975	9278452	440443326	4201999	1808692	2819247	9928389
UCAM-55669	2354851	2025982	2905011	11474576	6501722	4404417	520350	9457464	250846433	2303668	42828798	144201107	2229083	657370	103368471	2405293	7772799139	88106828	652788	81247102	832801	5215072	697210	7514883	1669548	17860483	42024	202742		3197711	1598842909	1070303742	1043707	157763078	47416895	710973	42227442	12129396	8184848	3761415525	103838897	216089979	73349911	7871130	331824810	2474933	1354937	2846155	6372849
UCAM-55670	3898200	8444351	2512139	10532327	5499159	8367004	648784	21264607	206592597	6860485	214605162	192977427	3169610	4697810	33670020	5107237	11155847530	188428073	8252798	92575393	1070443	8543002	92911	9883585	1886304	17445884	127028	283526	882335	9062291	2308898727	498916186	1316823	139098357	43201025	567850	33065855	15530528	7454108	2365192542	692229921	224744259	78199901	9541462	403104013	2521171	2384890	1554971	6123151
UCAM-55671	1685152	8131064	1130707	3898748	6300487	4330217	464641	4194194	102521598	1179754	28405986	53598388	2449064	246084	2053639	3296462	4516260225	47102783	458934	49987838	436861	5796819	29801	6940603	1064166	8590541		95451	382065	3854228	801204257	111295275	188036	76279608	17328790	616708	25281980	5400036	6174382	2103482587	77204104	152514117	49739697	2266947	208475105	1315493	600829	1634803	6524295
UCAM-55672	4542533	12721167	3509663	21746271	6359366	12769955	602305	29842992	182914149	9552303	236501014	285478741	6174963	461717	38099888	6365049	10163772477	169314771	6685499	110835514	1854756	13659130	275114	23685768	7160350	26937942	158898	628040	813858	12961834	1924216168	827224064	2122561	215954673	38712765	809670	42440103	33022466	5208713	2671516321	543885869	163527510	125007822	7717332	441359734	3217403	3381942	2965174	13498075
UCAM-55673	2794879	4357577	2478692	6031646	6194966	3010043	209403	4083586	129852260	1846368	35751835	91962397	3885499	421904	76874388	1297130	3259106291	31711097	519842	65219231	543843	5631287	414800	8524620	8013012	16937893			231570	11970874	735002468	420463640	1060034	90031465	31395115	621236	29587450	10472263	6670864	2873340045	51869095	147062413	86127664	2345400	296435542	993542	1761429	2774310	7783654
UCAM-55674	3943329	4121511	2258761	12133068	5353495	4655480	486312	12440189	281420180	4172701	73553559	139605589	2124736	2818266	2524707	3064634	8274043851	110472608	2293933	85790777	1029327	5972771	241753	6477641	1544724	13710594	124849		637645	8361104	1898420555	1533256418	1014097	136195807	27465767	305470	26310099	12732011	9446683	2561564485	396777301	255029570	36780854	12531342	397204974	4677453	836930	814526	4539405
UCAM-55675	3485196	4487439	2711206	9319193	5741445	3614938	462677	9598891	155949257	3497966	83947262	192922379	1987651	4023904	47830771	1515592	5090305433	52511291	480803	84892782	749024	7234603	1532726	9259838	3505986	13938020	53972	134473	583944	8620842	1494813072	1072379620	1288936	142678803	40631712	706872	33006345	9450791	7618068	3346739661	202732336	185425745	75916825	7472331	321679588	4067110	1290260	2168838	7701050
UCAM-55676	4697371	12280148	2686370	19219425	5548508	10653450	568545	7574915	143944445	3990988	52800266	240418051	4728250	1858863	41160347	4723336	8465970536	117422964	1160313	87736891	1438808	7853105	145592	14245574	2649167	20694912	129293	471889	617425	12768194	1722750423	213139350	401562	315809422	31519695	659959	54823635	21673481	5553027	2752565343	350572029	192526267	144931266	8218742	433688233	3515204	3777535	3438993	10164797
UCAM-55677	2687374	7779318	1165746	6375009	6085620	5310074	406306	4022923	88805498	1055280	66385953	114036533	2538427	381255	5190387	2585762	5824721500	63001808	1024321	55991226	421286	3005128	51977	6284966	1423810	11944638	51132	147824	325329	5526021	1295504091	142266556		161143355	18122889	588799	22872096	8284636	5971906	2607276324	334516721	154726815	65545784	3985560	265852185		1231143	2400413	5534926
UCAM-55678	3289182	4547000	3753742	13035601	1723226	4290823	492136	9345274	186596464	3813210	93071246	167196335	2168635	1581086	58452211	2025515	5755110842	66570812	1213083	77136412	1169591	9405063	4992548	13721422	5333488	16424154	123600	175140	883637	14958578	1701008307	1491154623	1488704	157357475	36591434	710813	32945738	11345906	4634635	3051461036	221124079	228733826	82025467	9650883	357188393	2000733	1356261	1216964	5106706
UCAM-55679	2060324	2917563	1245674	2428488	3699397	2294291	182329	5079572	143088824	1054215	16285595	67010816	1167833	180228	44685241	1193162	4181093740	42785618	509569	37186653	408304	2996477	1768446	4144722	1778589	6993032		64961	438723	8663083	781533484	647295012	374258	77795408	18532622		19301952	6866067	6360072	2296936433	156547179	116930998	38438849	3305608	219440180	2218797	526257	1647833	2126868
UCAM-55680	2838979	3006076	2152925	8123935	8152683	3987613	442266	11074292	331132099	4119146	39115959	192999968	2036172	4586373	106450834	1845080	6140546319	87525296	2948533	79820983	682643	5200270	2725743	8814622	1374761	16122345	103683	138851	758548	3775005	1307458686	1294000124	1826893	115444777	75012632	395717		12786558	8753013	3647840669	261334417	248373725	69074997	11144940	394954195	1591851	829841	2219274	4135441
UCAM-55681	2952017	3876026	2308557	10397810	5533557	2315887	389481	9360270	235863197	2394174	39379782	114268550	1569013		105646524	1376732	5785585975	73493822	772588	76757801	712636	5056441	1169303	7881825	4261774	15866223	65109	118238	317430	4608791	1752828371	1549056139	1449557	175546579	37702947	650450	36404844	9862676	8746381	3845366669	72301994	247336957	76985961	8596928	316718191	2124046	1189491	3202435	6294426
UCAM-55682	1747536	4286811	1223135	5823380	12098414	1519941	881923	13002400	166969012	11225118	53909811	170587819	2083157	380730	24907515	509522	1846347401	12159930	2067857	83416865	1216135	17555642	2270170	10963757	62801230	14617365	127522	59386	2436211	18623895	695163369	1232196128	2046594	125219632	62824376	1129351	31012805	7779793	1965574	2992232373	70000990	153884380	71599393	9917966	368436383	3637864	943386	1379601	4189053
UCAM-55683	2157419	5486333	1353524	5656067	6915359	3016126	355918	5347873	126248595	1488687	23194138	88820675	1897024	626970	37055092	1918887	4496826071	58715840	874246	51736557	432576	3921328	269488	4817293	1094978	12455198	46451	98876	376518	7372080	930085014	422663902	953595	138551280	25943493	421353	26295014	8433794	7266828	2808017847	145712864	182017786	63709711	4068381	265602711		937642	4812861	6012910
UCAM-55684	2990716	3798730	3249954	8386774	3996141	7752232	342661	12536397	415575793	3364121	60233586	155534338	927895	90420889	54438853	3612638	5720678174	93580838	286859	53792353	725552	5123983	4260810	7145311	20224030	8696000	104034	61635	663295	12646340	1175901201	1456711099	1197109	69038870	39435304	329620	24353258	9058111	10543533	2854502874	299821440	167736389	47970169	8585240	307382799	1032454	509500	1192846	4148555
UCAM-55685	3324674	9543266	2642592	7942848	3916634	14597318	584694	11792922	218629937	4689122	82507059	190686294	1316823	37065953	50432127	2631222	6612945748	70423398	1908817	74605701	1530636	10400682	4286544	11811558	2705080	15680194	139975	336482	987432	9378820	2773620705	1140144632	1616144	167228354	40584016	765180	29443622	13245656	3205981	2757456501	179146606	285790409	75580624	6620541	360172919	1856921	912082	950165	4934317
UCAM-55686	3019730	3386431	2675188	11715826	8407290	4893633	550665	7949596	187987688	4018208	53380799	225575936	2629010	17476808	107401949	2268109	4317816390	57850979	430997	98897067	729463	8044250	3060449	11243567	3234525	22196678	97664	157464	489104	6988670	1207422899	1515624340	1935618	209765745	38962237	749905	34941016	13875111	9196182	3306271840	159748972	233405562	111191180	7262202	328961355	1185326	1433417	2153248	8653338
UCAM-55687	2083388	6883292	1519859	6974028	10317219	10491750	300679	4238261	90016765	1347370	35056351	100018399	5542380	8879556		1168473	5626093624	76802089	542990	77137030	547772	4844218	1266626	4381477	1320461	17033654	36229		352564	11482273	1026824985	1467252449	1183204	157801025	31634877	347788	26159756	20105513	11735985	2962358799	128802038	311812706	80946362	3856384	314622394	2450014	2610207	3520166	8763421
[truncated: 1,022 more columns]

## Sheet: Fig.2H_Sample Data
PARENT_SAMPLE_NAME	CLIENT_IDENTIFIER	NEG	POLAR	POS EARLY	POS LATE	AGE	ANIMAL_ID	BOX_NUMBER	CLIENT_MATRIX	CLIENT_SAMPLE_ID	CLIENT_SAMPLE_NUMBER	DRUG	DRUG2	EXERCISE	EXERCISE2	GENDER	GROUP_NAME	GROUP_NUMBER	SAMPLE_AMOUNT	SAMPLE_AMOUNT_UNITS	SAMPLE_BOX_LOCATION	SAMPLE_DESCRIPTION	TREATMENT	VOL_EXTRACTED
UCAM-55656	77 / M40HR	277445	277461	277441	277454	97d	M40	2	SERUM	M40_HR_S	5	2HB	2HB	Running	Run	male	HR	5	186	uL	A5	SERUM	2-Hydroxybutyrate, treadmill Running	100
UCAM-55657	78 / M41HS	277445	277461	277441	277454	97d	M41	2	SERUM	M41_HS_S	6	2HB	2HB	Sedentary	Sed	male	HS	6	146	uL	A6	SERUM	2-Hydroxybutyrate, Sedentary control	100
UCAM-55662	83 / M52HR	277445	277461	277441	277454	97d	M52	2	SERUM	M52_HR_S	11	2HB	2HB	Running	Run	male	HR	5	198	uL	B2	SERUM	2-Hydroxybutyrate, treadmill Running	100
UCAM-55663	84 / M53HS	277445	277461	277441	277454	97d	M53	2	SERUM	M53_HS_S	12	2HB	2HB	Sedentary	Sed	male	HS	6	138	uL	B3	SERUM	2-Hydroxybutyrate, Sedentary control	100
UCAM-55668	89 / M70HR	277445	277461	277441	277454	77d	M70	2	SERUM	M70_HR_S	17	2HB	2HB	Running	Run	male	HR	5	144	uL	B8	SERUM	2-Hydroxybutyrate, treadmill Running	100
UCAM-55669	90 / M71HS	277445	277461	277441	277454	77d	M71	2	SERUM	M71_HS_S	18	2HB	2HB	Sedentary	Sed	male	HS	6	132	uL	B9	SERUM	2-Hydroxybutyrate, Sedentary control	100
UCAM-55674	95 / M81HR	277445	277461	277441	277454	77d	M81	2	SERUM	M81_HR_S	23	2HB	2HB	Running	Run	male	HR	5	119	uL	C5	SERUM	2-Hydroxybutyrate, treadmill Running	100
UCAM-55675	96 / M82HS	277445	277461	277441	277454	77d	M82	2	SERUM	M82_HS_S	24	2HB	2HB	Sedentary	Sed	male	HS	6	111	uL	C6	SERUM	2-Hydroxybutyrate, Sedentary control	100
UCAM-55680	101 / M92HR	277445	277461	277441	277454	77d	M92	2	SERUM	M92_HR_S	29	2HB	2HB	Running	Run	male	HR	5	132	uL	D2	SERUM	2-Hydroxybutyrate, treadmill Running	100
UCAM-55681	102 / M93HS	277445	277461	277441	277454	77d	M93	2	SERUM	M93_HS_S	30	2HB	2HB	Sedentary	Sed	male	HS	6	116	uL	D3	SERUM	2-Hydroxybutyrate, Sedentary control	100
UCAM-55685	106 / M102HR	277445	277461	277441	277454	77d	M102	2	SERUM	M102_HR_S	34	2HB	2HB	Running	Run	male	HR	5	187	uL	D7	SERUM	2-Hydroxybutyrate, treadmill Running	100
UCAM-55686	107 / M103HS	277445	277461	277441	277454	77d	M103	2	SERUM	M103_HS_S	35	2HB	2HB	Sedentary	Sed	male	HS	6	102	uL	D8	SERUM	2-Hydroxybutyrate, Sedentary control	100
UCAM-55652	73 / M11VR	277445	277461	277441	277454	97d	M11	2	SERUM	M11_VR_S	1	Vehicle	Veh	Running	Run	male	VR	1	148	uL	A1	SERUM	Vehicle, treadmill Running	100
UCAM-55653	74 / M23VS	277445	277461	277441	277454	97d	M23	2	SERUM	M23_VS_S	2	Vehicle	Veh	Sedentary	Sed	male	VS	2	68	uL	A2	SERUM	Vehicle, Sedentary control	50
UCAM-55658	79 / M42VR	277445	277461	277441	277454	97d	M42	2	SERUM	M42_VR_S	7	Vehicle	Veh	Running	Run	male	VR	1	214	uL	A7	SERUM	Vehicle, treadmill Running	100
UCAM-55659	80 / M43VS	277445	277461	277441	277454	97d	M43	2	SERUM	M43_VS_S	8	Vehicle	Veh	Sedentary	Sed	male	VS	2	171	uL	A8	SERUM	Vehicle, Sedentary control	100
UCAM-55664	85 / M60VR	277445	277461	277441	277454	97d	M60	2	SERUM	M60_VR_S	13	Vehicle	Veh	Running	Run	male	VR	1	192	uL	B4	SERUM	Vehicle, treadmill Running	100
UCAM-55665	86 / M61VS	277445	277461	277441	277454	97d	M61	2	SERUM	M61_VS_S	14	Vehicle	Veh	Sedentary	Sed	male	VS	2	142	uL	B5	SERUM	Vehicle, Sedentary control	100
UCAM-55670	91 / M72VR	277445	277461	277441	277454	77d	M72	2	SERUM	M72_VR_S	19	Vehicle	Veh	Running	Run	male	VR	1	129	uL	C1	SERUM	Vehicle, treadmill Running	100
UCAM-55671	92 / M73VS	277445	277461	277441	277454	77d	M73	2	SERUM	M73_VS_S	20	Vehicle	Veh	Sedentary	Sed	male	VS	2	99	uL	C2	SERUM	Vehicle, Sedentary control	75
UCAM-55676	97 / M83VR	277445	277461	277441	277454	77d	M83	2	SERUM	M83_VR_S	25	Vehicle	Veh	Running	Run	male	VR	1	143	uL	C7	SERUM	Vehicle, treadmill Running	100
UCAM-55677	98 / M84VS	277445	277461	277441	277454	77d	M84	2	SERUM	M84_VS_S	26	Vehicle	Veh	Sedentary	Sed	male	VS	2	96	uL	C8	SERUM	Vehicle, Sedentary control	75
UCAM-55682	103 / M94VR	277445	277461	277441	277454	77d	M94	2	SERUM	M94_VR_S	31	Vehicle	Veh	Running	Run	male	VR	1	230	uL	D4	SERUM	Vehicle, treadmill Running	100
UCAM-55683	104 / M100VS	277445	277461	277441	277454	77d	M100	2	SERUM	M100_VS_S	32	Vehicle	Veh	Sedentary	Sed	male	VS	2	99	uL	D5	SERUM	Vehicle, Sedentary control	75

## Sheet: Fig.2HIJ_Chemical Data
CHEM_ID	LIB_ID	COMP_ID	CHRO_LIB_ENTRY_ID	SUPER_PATHWAY	SUB_PATHWAY	PATHWAY_SORTORDER	TYPE	INCHIKEY	SMILES	CHEMICAL_NAME	PLOT_NAME	CAS	CHEMSPIDER	HMDB	KEGG	PUBCHEM	PLATFORM
30	305	39583	146992	Lipid	Mevalonate Metabolism	3198	NAMED	KJTLQQUUPVSXIM-UHFFFAOYSA-N	CC(CCO)(CC(O)=O)O	mevalonate	mevalonate	96949-03-0	388367	HMDB0000227	C02104	449	Polar
35	400	42370	166164	Amino Acid	Glutamate Metabolism	64	NAMED	DWAKNKKXGALPNW-UHFFFAOYSA-N	OC(C1CCC=N1)=O	S-1-pyrroline-5-carboxylate	S-1-pyrroline-5-carboxylate	2906-39-0	10140206	HMDB0001301	C04322	11966181	Pos Early
49	400	1408	155357	Amino Acid	Polyamine Metabolism	545	NAMED	KIDHWZJUCRJVML-UHFFFAOYSA-N	NCCCCN	putrescine	putrescine	110-60-1	13837702	HMDB0001414	C00134	1045	Pos Early
50	400	485	155305	Amino Acid	Polyamine Metabolism	553	NAMED	ATHGHQPFGPMSJY-UHFFFAOYSA-N	NCCCCNCCCN	spermidine	spermidine	124-20-9	1071	HMDB0001257	C00315	1102	Pos Early
55	400	27665	155829	Cofactors and Vitamins	Nicotinate and Nicotinamide Metabolism	4337	NAMED	LDHMAVIPBRSVRG-UHFFFAOYSA-N	C[N+]1=CC(C([NH-])=O)=CC=C1	1-methylnicotinamide	1-methylnicotinamide	1005-24-9	8305504	HMDB0000699	C02918	457	Pos Early
62	209	38395	143675	Lipid	Fatty Acid, Dihydroxy	2048	NAMED	CQSLTKIXAJTQGA-FLIBITNWSA-N	CCCCCC(C(C/C=C\CCCCCCCC(O)=O)O)O	12,13-DiHOME	12,13-DiHOME	263399-35-5	8412123	HMDB0004705	C14829	10236635	Neg
71	209	437	123157	Amino Acid	Tryptophan Metabolism	295	NAMED	DUUGKQCEGZLZNO-UHFFFAOYSA-N	OC1=CC=C(NC=C2CC(O)=O)C2=C1	5-hydroxyindoleacetate	5-hydroxyindoleacetate	54-16-0	1760	HMDB0000763	C05635	1826	Neg
92	305	38347	147843	Amino Acid	Lysine Metabolism	127	NAMED	FGSBNBBHOZHUBO-UHFFFAOYSA-N	OC(C(CCCC(O)=O)=O)=O	2-oxoadipate	2-oxoadipate	3184-35-8	70	HMDB0000225	C00322	71	Polar
93	305	528	146398	Energy	TCA Cycle	1463	NAMED	KPGXRSRHYNQIFN-UHFFFAOYSA-N	O=C(C(O)=O)CCC(O)=O	alpha-ketoglutarate	alpha-ketoglutarate	328-50-7,22202-68-2,305-72-6	50	HMDB0000208	C00026	51	Polar
98	209	1417	124553	Amino Acid	Tryptophan Metabolism	277	NAMED	HCZHHEIFKROPDY-UHFFFAOYSA-N	OC1=C(C=CC=C2)C2=NC(C(O)=O)=C1	kynurenate	kynurenate	492-27-3	3712	HMDB0000715	C01717	3845	Neg
111	305	1549	147711	Amino Acid	Leucine, Isoleucine and Valine Metabolism	433	NAMED	DBXBTMSZEOQQDU-UHFFFAOYSA-N	CC(C(O)=O)CO	3-hydroxyisobutyrate	3-hydroxyisobutyrate	2068-83-9	10140307	HMDB0000023,HMDB0000336	C01188,C06001	11966314	Polar
112	305	531	146400	Lipid	Mevalonate Metabolism	3196	NAMED	NPOAOTPXWNWTSH-UHFFFAOYSA-N	CC(CC(O)=O)(CC(O)=O)O	3-hydroxy-3-methylglutarate	3-hydroxy-3-methylglutarate	503-49-1	4573695	HMDB0000355	C03761	1662,5459993	Polar
132	400	1414	155361	Carbohydrate	Glycolysis, Gluconeogenesis, and Pyruvate Metabolism	1254	NAMED	OSJPPGNTCRNQQC-UHFFFAOYSA-N	OC(C(O)=O)COP(O)(O)=O	3-phosphoglycerate	3-phosphoglycerate	80731-10-8	10669764	HMDB0000807	C00597	724	Pos Early
136	209	22842	124689	Lipid	Primary Bile Acid Metabolism	3474	NAMED	BHQCQFFYRZLCQQ-OLRQUHAPSA-N	O[C@H]1[C@@]2([H])[C@]3([H])CC[C@H]([C@H](C)CCC(O)=O)[C@@]3(C)[C@@H](O)C[C@]2([H])[C@@]4(C)CC[C@@H](O)CC4C1	cholate	cholate	81-25-4		HMDB0000619	C00695	221493	Neg
171	209	3127	124615	Nucleotide	Purine Metabolism, (Hypo)Xanthine/Inosine containing	4141	NAMED	FDGQSTZJBFJUBT-UHFFFAOYSA-N	O=C1C(N=CN2)=C2N=CN1	hypoxanthine	hypoxanthine	68-94-0	768	HMDB0000157	C00262	790,135398638	Neg
179	209	38399	143740	Lipid	Fatty Acid, Dihydroxy	2049	NAMED	XEBKSQSGNGRGDW-YFHOEESVSA-N	CCCCC/C=C\CC(C(CCCCCCCC(O)=O)O)O	9,10-DiHOME	9,10-DiHOME	263399-34-4	8142232	HMDB0004704	C14828	9966640	Neg
180	209	1105	125969	Lipid	Long Chain Polyunsaturated Fatty Acid (n3 and n6)	1585	NAMED	OYHQOLUKZRVURQ-HZJYTTRNSA-N	OC(CCCCCCC/C=C\C/C=C\CCCCC)=O	linoleate (18:2n6)	linoleate (18:2n6)	60-33-3	4444105	HMDB0006270,HMDB0000673	C01595	5280450	Neg
181	209	1645	125740	Lipid	Medium Chain Fatty Acid	1520	NAMED	POULHZVOKOAJMA-UHFFFAOYSA-N	O=C(O)CCCCCCCCCCC	laurate (12:0)	laurate (12:0)	143-07-7	3756	HMDB0000638	C02679	3893	Neg
182	400	1899	155456	Cofactors and Vitamins	Nicotinate and Nicotinamide Metabolism	4321	NAMED	GJAWHXHKYYXBSV-UHFFFAOYSA-N	OC(C(C=CC=N1)=C1C(O)=O)=O	quinolinate	quinolinate	89-00-9	1037	HMDB0000232	C03722	1066	Pos Early
189	400	1498	155380	Amino Acid	Lysine Metabolism	118	NAMED	MXNRLFUSFKVQSK-UHFFFAOYSA-N	C[N+](C)(CCCCC(C([O-])=O)N)C	N6,N6,N6-trimethyllysine	N6,N6,N6-trimethyllysine	23284-33-5	140379	HMDB0001325	C03793	440120	Pos Early
192	400	37496	156406	Amino Acid	Polyamine Metabolism	546	NAMED	KLZGKIDSEJWEDW-UHFFFAOYSA-N	CC(NCCCCN)=O	N-acetylputrescine	N-acetylputrescine	18233-70-0	109095	HMDB0002064	C02714	122356	Pos Early
194	209	2829	124831	Amino Acid	Methionine, Cysteine, SAM and Taurine Metabolism	443	NAMED	PYUSHNKNPOHWEZ-UHFFFAOYSA-N	CSCCC(C(O)=O)NC=O	N-formylmethionine	N-formylmethionine	4289-98-9	388809	HMDB0001015	C03145	439750	Neg
197	209	42382	124939	Amino Acid	Methionine, Cysteine, SAM and Taurine Metabolism	452	NAMED	ZJUKTBDSGOFHSH-UHFFFAOYSA-N	OC1C(N2C=NC3=C2N=CN=C3N)OC(CSCCC(N)C(O)=O)C1O	S-adenosylhomocysteine (SAH)	S-adenosylhomocysteine (SAH)	979-92-0	16788012	HMDB0000939	C00021	439155	Neg
203	305	15737	147745	Xenobiotics	Chemical	6191	NAMED	AEMRFAOFKBGASW-UHFFFAOYSA-N	OCC(O)=O	glycolate (hydroxyacetate)	glycolate (hydroxyacetate)	79-14-1	737	HMDB0000115	C00160	757	Polar
209	400	32342	155907	Nucleotide	Purine Metabolism, Adenine containing	4160	NAMED	UDMBCSSLTHHNCD-UHFFFAOYSA-N	NC1=NC=NC2=C1N=CN2C3OC(C(C3O)O)COP(O)(O)=O	adenosine 5'-monophosphate (AMP)	AMP	149022-20-8	10239183	HMDB0000045	C00020	6083	Pos Early
212	400	1419	155365	Amino Acid	Polyamine Metabolism	564	NAMED	WUUGFSXJNOTRMR-IOSLPCCCSA-N	NC1=NC=NC2=C1N=CN2[C@H]3[C@H](O)[C@H](O)[C@@H](CSC)O3	5-methylthioadenosine (MTA)	5-methylthioadenosine (MTA)	2457-80-9	388321	HMDB0001173	C00170	439176	Pos Early
213	209	37114	127643	Nucleotide	Purine Metabolism, Adenine containing	4175	NAMED	VQAYFKKCNSOZKM-UHFFFAOYSA-N	OC(C1O)C(OC1CO)N(C=N2)C3=C2C(NC)=NC=N3	N6-methyladenosine	N6-methyladenosine	1867-73-8	92307	HMDB0004044		102175	Neg
215	400	558	155321	Cofactors and Vitamins	Nicotinate and Nicotinamide Metabolism	4347	NAMED	SDMADEZQMYCSNO-UHFFFAOYSA-N	NC1=NC=NC2=C1N=CN2C3OC(C(C3O)O)COP(O)(OP(O)(OC4OC(C(C4O)O)CO)=O)=O	adenosine 5'-diphosphoribose (ADP-ribose)	adenosine 5'-diphosphoribose (ADP-ribose)	68414-18-6	3674071	HMDB0001178	C00301	192	Pos Early
218	305	33434	146950	Nucleotide	Purine Metabolism, (Hypo)Xanthine/Inosine containing	4155	NAMED	NUCLJNSWZCHRKL-UHFFFAOYSA-N	OC(C(NC(N)=O)NC(N)=O)=O	allantoic acid	allantoic acid	99-16-1	198	HMDB0001209	C00499	203	Polar
219	305	1763	147132	Carbohydrate	Pentose Phosphate Pathway	1272	NAMED	YXJDFQJKERBOBM-TXICZTDVSA-N	O[C@@H]1[C@H](O)[C@@H](CO)O[C@@H]1OP(O)(O)=O	ribose 1-phosphate	ribose 1-phosphate	50-99-7,58459-37-3	388373	HMDB0001489	C00620	439236	Polar
229	209	1110	125971	Lipid	Long Chain Polyunsaturated Fatty Acid (n3 and n6)	1591	NAMED	YZXBAPSDXZZRGB-DOFZRALJSA-N	CCCCC/C=C\C/C=C\C/C=C\C/C=C\CCCC(O)=O	arachidonate (20:4n6)	arachidonate (20:4n6)	506-32-1	392692	HMDB0001043	C00219	444899	Neg
231	400	1638	155435	Amino Acid	Urea cycle; Arginine and Proline Metabolism	490	NAMED	ODKSFYDXXFIFQN-UHFFFAOYSA-N	N=C(N)NCCCC(N)C(O)=O	arginine	arginine	1119-34-2	227	HMDB0000517	C00062	6322	Pos Early
232	400	15497	155552	Amino Acid	Urea cycle; Arginine and Proline Metabolism	491	NAMED	KDZOASGQNOPSCU-UHFFFAOYSA-N	NC(C(O)=O)CCCNC(NC(C(O)=O)CC(O)=O)=N	argininosuccinate	argininosuccinate	156637-58-0	805	HMDB0000052	C03406	60150382	Pos Early
234	400	443	155304	Amino Acid	Alanine and Aspartate Metabolism	36	NAMED	CKLJMWTZIZZHCS-UHFFFAOYSA-N	NC(C(O)=O)CC(O)=O	aspartate	aspartate	56-84-8	5745	HMDB0000191	C00049	5960	Pos Early
240	209	32197	123321	Amino Acid	Tyrosine Metabolism	186	NAMED	JVGVDSSUAVXRDY-UHFFFAOYSA-N	OC(C(O)=O)CC1=CC=C(O)C=C1	3-(4-hydroxyphenyl)lactate	3-(4-hydroxyphenyl)lactate (HPLA)	6482-98-0	9010	HMDB0000755	C03672	9378	Neg
241	209	566	124529	Amino Acid	Phenylalanine Metabolism	155	NAMED	BTNMPGBKDVTSJY-UHFFFAOYSA-N	O=C(C(O)=O)CC1=CC=CC=C1	phenylpyruvate	phenylpyruvate	156-06-9	972	HMDB0000205	C00166	997	Neg
244	400	55	155295	Nucleotide	Pyrimidine Metabolism, Uracil containing	4260	NAMED	UCMIRNVEIXFBKS-UHFFFAOYSA-N	NCCC(O)=O	beta-alanine	beta-alanine	107-95-9,56-41-7	234	HMDB0000056	C00099	239	Pos Early
249	400	1768	155446	Amino Acid	Histidine Metabolism	86	NAMED	CQOVPNPJLQNMDC-ZETCQYMHSA-N	OC([C@H](CC1=CNC=N1)NC(CCN)=O)=O	carnosine	carnosine	305-84-0	388363	HMDB0000033	C00386	439224	Pos Early
250	402	2137	158009	Cofactors and Vitamins	Hemoglobin and Porphyrin Metabolism	4433	NAMED	QBUVFDKTZJNUPP-YBRAVLHJSA-N	CC1=C(/C=C(N2)/C(C=C)=C(C)C2=O)NC(/C=C3C(CCC(O)=O)=C(C)C(/C=C(N4)\C(C)=C(C=C)C4=O)=N\3)=C1CCC(O)=O	biliverdin	biliverdin	55482-27-4,55482-27-4	10628548	HMDB0001008	C00500	5280353	Pos Late
252	305	1437	147106	Energy	TCA Cycle	1466	NAMED	KDYFGRWQOYBRFD-UHFFFAOYSA-N	OC(CCC(O)=O)=O	succinate	succinate	110-15-6	1078	HMDB0000254	C00042	1110	Polar
254	305	542	145710	Lipid	Ketone Bodies	1956	NAMED	WHBMMWSBFZVSSR-UHFFFAOYSA-N	CC(O)CC(O)=O	3-hydroxybutyrate (BHBA)	3-hydroxybutyrate (BHBA)	625-72-9	428	HMDB0000442,HMDB0000357,HMDB0000011	C03197,C01089	94318,441,92135	Polar
266	402	63	164177	Lipid	Sterol	3213	NAMED	HVYWMOMLDIMFJA-LBHVWCRMSA-N	CC1(C2C(C)CCCC(C)C)C(CC2)C(CC=C3C4(CC[C@H](O)C3)C)C4CC1	cholesterol	cholesterol	57-88-5	4937803	HMDB0000067	C00187	5997,6432564,11025495	Pos Late
267	400	34396	156099	Lipid	Phospholipid Metabolism	2251	NAMED	YHHSONZFOIEMCP-UHFFFAOYSA-N	C[N+](C)(CCOP(O)([O-])=O)C	choline phosphate	phosphocholine	72556-74-2	119298	HMDB0001565	C00588	1014	Pos Early
272	209	5983	126005	Lipid	Corticosteroids	3318	NAMED	OMFXVFTZEKFJBZ-UHFFFAOYSA-N	CC(C(CC1)=CC2=O)(CC2)C3C1C(CCC4C(CO)=O)C4(C)CC3O	corticosterone	corticosterone	50-22-6	5550	HMDB0001547	C02140	5753	Neg
275	400	513	155307	Amino Acid	Creatine Metabolism	537	NAMED	DDRJAANPRJIHGJ-UHFFFAOYSA-N	CN(C(N1)=N)CC1=O	creatinine	creatinine	60-27-5	568	HMDB0000562	C00791	588	Pos Early
279	400	56	155296	Amino Acid	Methionine, Cysteine, SAM and Taurine Metabolism	468	NAMED	LEVWYRKDKASIDU-UHFFFAOYSA-N	NC(C(O)=O)CSSCC(N)C(O)=O	cystine	cystine	56-89-3	575	HMDB0000192	C00491	67678	Pos Early
282	400	2372	155469	Nucleotide	Pyrimidine Metabolism, Cytidine containing	4268	NAMED	IERHLVCPSMICTF-UHFFFAOYSA-N	NC1=NC(N(C2OC(C(C2O)O)COP(O)(O)=O)C=C1)=O	cytidine 5'-monophosphate (5'-CMP)	CMP	63-37-6	5414497	HMDB0000095	C00055	6131	Pos Early
291	305	31260	147190	Carbohydrate	Glycolysis, Gluconeogenesis, and Pyruvate Metabolism	1241	NAMED	NBSCHQHZLSJFNQ-UHFFFAOYSA-N	OC1OC(C(C(C1O)O)O)COP(O)(O)=O	glucose 6-phosphate	glucose 6-phosphate	103192-55-8	19952394	HMDB0001401	C00092	5958	Polar
297	402	17747	158164	Lipid	Sphingosines	3180	NAMED	WWUZIQQURGPMPG-CCEZHUSRSA-N	CCCCCCCCCCCCC/C=C/C(C(CO)N)O	sphingosine	sphingosine	123-78-4	4510275	HMDB0000252	C00319	5280335	Pos Late
302	209	1114	125714	Lipid	Secondary Bile Acid Metabolism	3500	NAMED	KXGVEGMKQFWNSR-OHAQSFBXSA-N	CC12[C@@]([C@]3([H])CC[C@]4([H])C[C@H](O)CC[C@]4(C)[C@@]3([H])C[C@@H]2O)([H])CC[C@]1([H])[C@]([H])(C)CCC(O)=O	deoxycholate	deoxycholate	83-44-3	389318	HMDB0000626	C04483	222528,440355	Neg
309	400	15522	155557	Carbohydrate	Glycolysis, Gluconeogenesis, and Pyruvate Metabolism	1249	NAMED	GNGACRATGGDKBX-UHFFFAOYSA-N	OCC(COP(O)(O)=O)=O	dihydroxyacetone phosphate (DHAP)	dihydroxyacetone phosphate (DHAP)	102783-56-2	3833110	HMDB0001473	C00111	668	Pos Early
313	402	17769	158166	Lipid	Sphingolipid Synthesis	3020	NAMED	OTKJDMGTUTTYMP-UHFFFAOYSA-N	CCCCCCCCCCCCCCCC(C(CO)N)O	sphinganine	sphinganine	3102-56-5	3014	HMDB0000269	C00836	3126	Pos Late
327	209	2134	124607	Cofactors and Vitamins	Riboflavin Metabolism	4354	NAMED	VWWQXMAJTJZDQX-KUIMXZBMSA-N	OC(C(O)C(O)COP(OP(OC[C@H]1O[C@@H](N(C=N2)C3=C2C(N)=NC=N3)[C@H](O)[C@@H]1O)(O)=O)(O)=O)CN(C(C=C(C)C(C)=C4)=C4N=C5C(N6)=O)C5=NC6=O	flavin adenine dinucleotide (FAD)	FAD	146-14-5,84366-81-4	559059	HMDB0001248	C00016	643975	Neg
330	305	1643	146876	Energy	TCA Cycle	1467	NAMED	VZCYOOQTPOCHFL-OWOJBTEDSA-N	OC(/C=C/C(O)=O)=O	fumarate	fumarate	100-17-8	10197150	HMDB0000134	C00122	444972	Polar
331	400	36738	156248	Peptide	Gamma-glutamyl Amino Acid	650	NAMED	OWQDWQKWSLFFFR-UHFFFAOYSA-N	O=C(O)C(N)CCC(NC(C(O)=O)CCC(O)=O)=O	gamma-glutamylglutamate	gamma-glutamylglutamate	1116-22-9	83831	HMDB0011737	C05282	92865	Pos Early
338	305	587	147098	Xenobiotics	Food Component/Plant	4828	NAMED	RGHNJXZEOKUKBD-SQOUGZDYSA-N	OC([C@H](O)[C@@H](O)[C@H](O)[C@H](O)CO)=O	gluconate	gluconate	527-07-1	10240	HMDB0000625	C00257	10690,3085666	Polar
339	305	396	146390	Lipid	Fatty Acid, Dicarboxylate	1677	NAMED	JFCQEDHGNNZCLN-UHFFFAOYSA-N	OC(CCCC(O)=O)=O	glutarate (C5-DC)	glutarate (C5-DC)	110-94-1	3618533	HMDB0000661	C00489	743,4418048	Polar
340	400	58	160611	Amino Acid	Glycine, Serine and Threonine Metabolism	1	NAMED	DHMQDGOQFOQNFH-UHFFFAOYSA-N	NCC(O)=O	glycine	glycine	56-40-6	730	HMDB0000123	C00037	750	Pos Early
342	209	18476	126842	Lipid	Primary Bile Acid Metabolism	3475	NAMED	RFDAIACWWDREDC-FRVQLJSFSA-N	O=C(CNC(CC[C@H]([C@@H]1[C@@]2(C)[C@@H](O)C[C@]3([H])[C@@]4(C)CC[C@@H](O)C[C@@]4([H])C[C@@H](O)[C@@]3([H])[C@]2([H])CC1)C)=O)O	glycocholate	glycocholate	475-31-0,863-57-0	9734	HMDB0000138	C01921	10140	Neg
344	305	43802	147630	Amino Acid	Creatine Metabolism	535	NAMED	BPMFZUMJYQTVII-UHFFFAOYSA-N	NC(NCC(O)=O)=N	guanidinoacetate	guanidinoacetate	352-97-6	743	HMDB0000128	C00581	763	Polar
347	400	2849	155481	Nucleotide	Purine Metabolism, Guanine containing	4198	NAMED	RQFCJASXJCIDSX-UHFFFAOYSA-N	NC1=NC2=C(C(N1)=O)N=CN2C3OC(C(C3O)O)COP(O)(O)=O	guanosine 5'-monophosphate (5'-GMP)	5'- GMP	5550-12-9	741	HMDB0001397	C00144	6804	Pos Early
354	400	1574	155412	Amino Acid	Histidine Metabolism	90	NAMED	NTYJJOPFIAHURM-UHFFFAOYSA-N	NCCC1=CNC=N1	histamine	histamine	51-45-6	753	HMDB0000870	C00388	774	Pos Early
355	209	59	123153	Amino Acid	Histidine Metabolism	72	NAMED	HNDVDQJCIGZPNO-UHFFFAOYSA-N	NC(C(O)=O)CC1=CN=CN1	histidine	histidine	5934-29-2	752	HMDB0000177	C00135	6274	Neg
358	400	590	155331	Amino Acid	Methionine, Cysteine, SAM and Taurine Metabolism	476	NAMED	VVIUBCNYACGLLV-UHFFFAOYSA-N	NCCS(O)=O	hypotaurine	hypotaurine	300-84-5	96959	HMDB0000965	C00519	107812	Pos Early
361	209	1123	123191	Nucleotide	Purine Metabolism, (Hypo)Xanthine/Inosine containing	4140	NAMED	UGQMRVRMYYASKQ-KQYNXXCUSA-N	O[C@H]1[C@H](N2C(N=CN=C3O)=C3N=C2)O[C@H](CO)[C@H]1O	inosine	inosine	58-63-9	21241953	HMDB0000195	C00294	6021	Neg
362	400	2133	155461	Nucleotide	Purine Metabolism, (Hypo)Xanthine/Inosine containing	4139	NAMED	GRSZFWQUAKGDAV-UHFFFAOYSA-N	OC1C(C(N2C=NC3=C2N=CNC3=O)OC1COP(O)(O)=O)O	inosine 5'-monophosphate (IMP)	inosine 5'-monophosphate (IMP)	4691-65-0	5482599	HMDB0000175	C00130	8582	Pos Early
363	305	1124	145716	Lipid	Inositol Metabolism	2219	NAMED	CDAISMWEOUEBRE-GPIVLXJGSA-N	O[C@@H]1[C@@H](O)[C@H](O)[C@H](O)[C@H](O)[C@H]1O	myo-inositol	myo-inositol	87-89-8	10239179	HMDB0000211	C00137	892	Polar
376	400	1125	155350	Amino Acid	Leucine, Isoleucine and Valine Metabolism	390	NAMED	AGPKZVBTJJNPAG-UHFFFAOYSA-N	NC(C(O)=O)C(C)CC	isoleucine	isoleucine	73-32-5	769	HMDB0000172	C06418,C00407,C16424	6306	Pos Early
381	305	6146	147948	Amino Acid	Lysine Metabolism	125	NAMED	OYIFNHCXNCRBQI-UHFFFAOYSA-N	OC(CCCC(N)C(O)=O)=O	2-aminoadipate	2-aminoadipate	1118-90-7,542-32-5	456	HMDB0000510	C00956	92136	Polar
391	400	2132	155460	Amino Acid	Urea cycle; Arginine and Proline Metabolism	499	NAMED	RHGKLRLOHDJJDR-UHFFFAOYSA-N	NC(C(O)=O)CCCNC(N)=O	citrulline	citrulline	372-75-8	810	HMDB0000904	C00327	9750	Pos Early
397	400	60	155300	Amino Acid	Leucine, Isoleucine and Valine Metabolism	337	NAMED	ROHFNLRQFUQHCH-YFKPBYRVSA-N	O=C([C@H](CC(C)C)N)O	leucine	leucine	61-90-5		HMDB0000687	C00123	6106	Pos Early
407	400	1301	155354	Amino Acid	Lysine Metabolism	107	NAMED	KDXKERNSBIXSRK-UHFFFAOYSA-N	NC(C(O)=O)CCCCN	lysine	lysine	56-87-1	5747	HMDB0003405	C00739,C00047	5962	Pos Early
409	209	1303	123199	Energy	TCA Cycle	1469	NAMED	BJEPYKJPYRNKOW-UHFFFAOYSA-N	OC(C(O)=O)CC(O)=O	malate	malate	6915-15-7	510	HMDB0031518,HMDB0000156,HMDB0000744	C00149,C00711,C00497	525	Neg
415	400	1302	155355	Amino Acid	Methionine, Cysteine, SAM and Taurine Metabolism	440	NAMED	FFEARJCKVFRZRR-UHFFFAOYSA-N	CSCCC(N)C(O)=O	methionine	methionine	63-68-3	5907	HMDB0000696	C00073	6137	Pos Early
418	305	1496	145730	Lipid	Fatty Acid Metabolism (also BCAA Metabolism)	1792	NAMED	ZIYVHBGGAOATLY-UHFFFAOYSA-N	O=C(C(C(O)=O)C)O	methylmalonate (MMA)	methylmalonate (MMA)	516-05-2	473	HMDB0000202	C02170	487	Polar
424	209	1336	125720	Lipid	Long Chain Saturated Fatty Acid	1528	NAMED	IPCSVZSSVZVIGE-UHFFFAOYSA-N	OC(CCCCCCCCCCCCCCC)=O	palmitate (16:0)	palmitate (16:0)	57-10-3	960	HMDB0000220	C00249	985	Neg
432	400	594	155332	Cofactors and Vitamins	Nicotinate and Nicotinamide Metabolism	4325	NAMED	DFPAKSUCGFBDDF-UHFFFAOYSA-N	NC(C1=CN=CC=C1)=O	nicotinamide	nicotinamide	98-92-0	911	HMDB0001406	C00153	936	Pos Early
437	209	12035	125748	Lipid	Medium Chain Fatty Acid	1510	NAMED	FBUKVWPVBMHYJY-UHFFFAOYSA-N	CCCCCCCCC(O)=O	pelargonate (9:0)	pelargonate (9:0)	112-05-0	4574394	HMDB0000847	C01601	8158	Neg
439	209	1358	125724	Lipid	Long Chain Saturated Fatty Acid	1532	NAMED	QIQXTHQIDYTFRH-UHFFFAOYSA-N	CCCCCCCCCCCCCCCCCC(O)=O	stearate (18:0)	stearate (18:0)	57-11-4	5091	HMDB0000827	C01530	5281	Neg
444	400	1493	155375	Amino Acid	Urea cycle; Arginine and Proline Metabolism	494	NAMED	AHLPHDHHMVZTML-BYPYZUCNSA-N	O=C(O)[C@@H](N)CCCN	ornithine	ornithine	3184-13-2	6026	HMDB0000214	C00077	6262	Pos Early
445	305	1505	146440	Nucleotide	Pyrimidine Metabolism, Orotate containing	4228	NAMED	PXQPEWDEAKTCGB-UHFFFAOYSA-N	O=C(C1=CC(O)=NC(O)=N1)O	orotate	orotate	50887-69-9	942	HMDB0000226	C00295	967	Polar
448	400	27727	155840	Amino Acid	Glutathione Metabolism	575	NAMED	YPZRWBKMTBYPTK-BJDJZHNGSA-N	O=C([C@@H](NC(CC[C@@H](C(O)=O)N)=O)CSSC[C@@H](C(NCC(O)=O)=O)NC(CC[C@@H](C(O)=O)N)=O)NCC(O)=O	glutathione, oxidized (GSSG)	glutathione, oxidized (GSSG)	103239-24-3	58835	HMDB0003337	D00031,C00127	65359	Pos Early
452	209	33447	126083	Lipid	Long Chain Monounsaturated Fatty Acid	1547	NAMED	SECPZKHBENQXJG-FPLPWBNLSA-N	CCCCCC\C=C/CCCCCCCC(O)=O	palmitoleate (16:1n7)	palmitoleate (16:1n7)	373-49-9	393216	HMDB0003229	C08362	445638	Neg
460	400	64	155301	Amino Acid	Phenylalanine Metabolism	142	NAMED	COLNVLDHVKWLRT-UHFFFAOYSA-N	NC(C(O)=O)CC1=CC=CC=C1	phenylalanine	phenylalanine	63-91-2	5910	HMDB0000159	C00079	6140	Pos Early
461	400	42109	156915	Energy	Oxidative Phosphorylation	1486	NAMED	NBIIXXVUZAFLBC-UHFFFAOYSA-N	O=P(O)(O)O	phosphate	phosphate	7664-38-2	1032	HMDB0001429	C00009	1061	Pos Early
463	209	597	124535	Carbohydrate	Glycolysis, Gluconeogenesis, and Pyruvate Metabolism	1255	NAMED	DTBNBXWJWCWCIK-UHFFFAOYSA-N	O=P(O)(OC(C(O)=O)=C)O	phosphoenolpyruvate (PEP)	phosphoenolpyruvate (PEP)	10526-80-4	980	HMDB0000263	C00074	1005	Neg
480	400	1898	155455	Amino Acid	Urea cycle; Arginine and Proline Metabolism	502	NAMED	ONIBWKKTOPOVIA-UHFFFAOYSA-N	OC(C1CCCN1)=O	proline	proline	147-85-3	128566	HMDB0000162,HMDB0003411	C00148,C000763	8988,145742,614	Pos Early
482	305	527	146396	Carbohydrate	Glycolysis, Gluconeogenesis, and Pyruvate Metabolism	1257	NAMED	JVTAAEKCZFNVCJ-UHFFFAOYSA-N	CC(O)C(O)=O	lactate	lactate	79-33-4	592	HMDB0000190	C00186	612	Polar
491	400	1651	155439	Cofactors and Vitamins	Vitamin B6 Metabolism	4472	NAMED	RADKZDMFGJYCBB-UHFFFAOYSA-N	OC1=C(C)N=CC(CO)=C1C=O	pyridoxal	pyridoxal	65-22-5	1021	HMDB0001545	C00250	1050	Pos Early
498	402	1806	165222	Cofactors and Vitamins	Vitamin A Metabolism	4451	NAMED	FPIPGXGPPPQFEQ-OVSJKPMPSA-N	C/C(/C=C/C(C(C)(CCC1)C)=C1C)=C\C=C\C(C)=C\CO	retinol (vitamin A)	retinol (vitamin A)	68-26-8	393012	HMDB0000305	C00473	445354	Pos Late
500	209	1827	123225	Cofactors and Vitamins	Riboflavin Metabolism	4353	NAMED	AUNGANRZJHBGPY-UHFFFAOYSA-N	OC(C(O)C(O)CO)CN1C(C=C2C)=C(C=C2C)N=C(C(N3)=O)C1=NC3=O	riboflavin (vitamin B2)	riboflavin (vitamin B2)	83-88-5	431981	HMDB0000244	C00255	493570	Neg
501	305	1515	164364	Xenobiotics	Drug - Topical Agents	5990	NAMED	YGSDEFSMJLZEOE-UHFFFAOYSA-N	OC1=C(C(O)=O)C=CC=C1	salicylate	salicylate	69-72-7	331	HMDB0001895	C00805	338	Polar
503	400	1648	155437	Amino Acid	Glycine, Serine and Threonine Metabolism	10	NAMED	MTCFGRXMJLQNBG-REOHCLBHSA-N	OC([C@@H](N)CO)=O	serine	serine	56-45-1	5736	HMDB0000187	C00065	5951	Pos Early
504	400	2342	155468	Amino Acid	Tryptophan Metabolism	292	NAMED	QZAYGJVTTNCVMB-UHFFFAOYSA-N	NCCC1=CNC(C=C2)=C1C=C2O	serotonin	serotonin	153-98-0	5013	HMDB0000259	C00780	5202	Pos Early
507	400	603	155336	Amino Acid	Polyamine Metabolism	560	NAMED	PFNFFQXMRSDOHW-UHFFFAOYSA-N	NCCCNCCCCNCCCN	spermine	spermine	71-44-3	1072	HMDB0001256	C00750	1103	Pos Early
512	400	2125	155458	Amino Acid	Methionine, Cysteine, SAM and Taurine Metabolism	477	NAMED	XOAAWQZATWQOTB-UHFFFAOYSA-N	NCCS(=O)(O)=O	taurine	taurine	107-35-7	1091	HMDB0000251	C00245	1123	Pos Early
519	209	1365	125728	Lipid	Long Chain Saturated Fatty Acid	1525	NAMED	TUNFSRHWOTWDNC-UHFFFAOYSA-N	OC(CCCCCCCCCCCCC)=O	myristate (14:0)	myristate (14:0)	544-63-8	10539	HMDB0000806	C06424	11005	Neg
533	400	1670	155443	Amino Acid	Urea cycle; Arginine and Proline Metabolism	492	NAMED	XSQUKJJJFZCRTK-UHFFFAOYSA-N	O=C(N)N	urea	urea	57-13-6	1143	HMDB0000294	C00086	1176	Pos Early
535	209	606	123185	Nucleotide	Pyrimidine Metabolism, Uracil containing	4240	NAMED	DRTQHJPVMGBUCF-UHFFFAOYSA-N	OC1C(N(C=CC2=O)C(N2)=O)OC(CO)C1O	uridine	uridine	58-96-8	5807	HMDB0000296	C00299	6029	Neg
536	209	1412	123201	Nucleotide	Pyrimidine Metabolism, Uracil containing	4256	NAMED	MXHRCPNRJAMMIM-UHFFFAOYSA-N	O=C(NC1=O)N(C=C1)C(CC2O)OC2CO	2'-deoxyuridine	2'-deoxyuridine	951-78-0	13118	HMDB0000012	C00526	13712	Neg
537	400	607	155340	Amino Acid	Histidine Metabolism	80	NAMED	LOIYMIARKYCTBW-OWOJBTEDSA-N	O=C(O)/C=C/C1=CNC=N1	trans-urocanate	trans-urocanate	104-98-3	643824	HMDB0000301	C00785	736715	Pos Early
561	400	57	155297	Amino Acid	Glutamate Metabolism	46	NAMED	WHUUTDBJXJRKMK-VKHMYHEASA-N	O=C(O)[C@@H](N)CCC(O)=O	glutamate	glutamate	56-86-0	591	HMDB0000148	C00025,C00217	33032	Pos Early
563	400	53	155293	Amino Acid	Glutamate Metabolism	47	NAMED	ZDXPYRJPNDTMRX-VKHMYHEASA-N	OC([C@@H](N)CCC(N)=O)=O	glutamine	glutamine	56-85-9	5746	HMDB0000641	C00064	5961	Pos Early
564	400	1284	155352	Amino Acid	Glycine, Serine and Threonine Metabolism	17	NAMED	AYFVYJQAPQTCCC-GBXIJSLDSA-N	N[C@H](C(O)=O)[C@H](O)C	threonine	threonine	72-19-5	6051	HMDB0000167	C00188	6288	Pos Early
565	400	54	155294	Amino Acid	Tryptophan Metabolism	259	NAMED	QIVBCDIJIAJPQS-VIFPVBQESA-N	O=C(O)[C@@H](N)CC1=CNC2=C1C=CC=C2	tryptophan	tryptophan	73-22-3	6066	HMDB0000929	C00078	6305	Pos Early
566	400	1649	155438	Amino Acid	Leucine, Isoleucine and Valine Metabolism	421	NAMED	KZSNJWFQEVHDMF-BYPYZUCNSA-N	N[C@H](C(O)=O)C(C)C	valine	valine	72-18-4	6050	HMDB0000883	C00183	6287	Pos Early
568	400	2150	155464	Cofactors and Vitamins	Vitamin B6 Metabolism	4469	NAMED	NHZMQXZHNVQTQA-UHFFFAOYSA-N	NCC(C(O)=C(C)N=C1)=C1CO	pyridoxamine	pyridoxamine	58052-48-5	1023	HMDB0001431	C00534	1052	Pos Early
572	305	48152	151982	Carbohydrate	Glycolysis, Gluconeogenesis, and Pyruvate Metabolism	1240	NAMED	WQZGKKKJIJFFOK-DVKNGEFBSA-N	O[C@H]1O[C@H](CO)[C@@H](O)[C@H](O)[C@H]1O	glucose	glucose	50-99-7	71358	HMDB0000122	C00031	5793	Polar
798	400	555	155320	Nucleotide	Purine Metabolism, Adenine containing	4167	NAMED	OIRDTQYFTABQOQ-KQYNXXCUSA-N	NC1=NC=NC2=C1N=CN2[C@@]3([H])[C@@](O)([H])[C@@](O)([H])[C@](CO)([H])O3	adenosine	adenosine	58-61-7	54923	HMDB0000050	C00212	60961	Pos Early
799	400	3141	155487	Amino Acid	Glycine, Serine and Threonine Metabolism	7	NAMED	KWIUHFFTVRNATP-UHFFFAOYSA-N	O=C(C[N+](C)(C)C)[O-]	betaine	betaine	107-43-7	19951173,242	HMDB0000043	C00719	247	Pos Early
800	400	1868	155454	Amino Acid	Methionine, Cysteine, SAM and Taurine Metabolism	461	NAMED	XUJNEKJLAYXESH-REOHCLBHSA-N	SC[C@H](N)C(O)=O	cysteine	cysteine	56-89-3,52-90-4	5653	HMDB0000574	C00097	5862	Pos Early
803	305	584	146414	Carbohydrate	Fructose, Mannose and Galactose Metabolism	1370	NAMED	WQZGKKKJIJFFOK-DXQLJALPSA-N	O[C@@H]1C(CO)O[C@@H](O)[C@@H](O)[C@H]1O	mannose	mannose	3458-28-4	141983	HMDB0000169	C00159,C02209,C00936	82308,439680,185698,18950	Polar
806	400	5086	155492	Amino Acid	Glycine, Serine and Threonine Metabolism	6	NAMED	FFDGPVCHZBVARC-UHFFFAOYSA-N	CN(C)CC(O)=O	dimethylglycine	dimethylglycine	1118-68-9	653	HMDB0000092	C03626	673	Pos Early
811	400	1126	155351	Amino Acid	Alanine and Aspartate Metabolism	29	NAMED	QNAYBMKLOCPYGJ-REOHCLBHSA-N	O=C(O)[C@@H](N)C	alanine	alanine	56-41-7	5735	HMDB0000161	C00041	5950	Pos Early
815	400	1299	155353	Amino Acid	Tyrosine Metabolism	167	NAMED	OUYCCCASQSFEME-QMMMGPOBSA-N	N[C@@H](CC1=CC=C(O)C=C1)C(O)=O	tyrosine	tyrosine	60-18-4	5833	HMDB0000158	C00082	6057	Pos Early
818	305	15872	147518	Lipid	Fatty Acid Synthesis	1490	NAMED	OFOBLEOULBTSOW-UHFFFAOYSA-N	O=C(O)CC(O)=O	malonate	malonate	26522-22-85-0,141-82-2	844	HMDB0000691	C00383	867	Polar
821	209	33442	125870	Nucleotide	Pyrimidine Metabolism, Uracil containing	4242	NAMED	PTJWIQPHWPFNBW-GBNDHIKLSA-N	O[C@]1([H])[C@@](O)([H])[C@](CO)([H])O[C@]1(C2=CNC(NC2=O)=O)[H]	pseudouridine	pseudouridine	1445-07-4	21403010	HMDB0000767	C02067	15047	Neg
823	305	48990	160586	Carbohydrate	Glycolysis, Gluconeogenesis, and Pyruvate Metabolism	1256	NAMED	LCTONWCANYUPML-UHFFFAOYSA-N	CC(C(O)=O)=O	pyruvate	pyruvate	127-17-3	96901	HMDB0000243	C00022	1060	Polar
825	400	605	155338	Nucleotide	Pyrimidine Metabolism, Uracil containing	4241	NAMED	ISAKRJDGNUQOIC-UHFFFAOYSA-N	O=C(NC=C1)NC1=O	uracil	uracil	66-22-8	1141	HMDB0000300	C00106	1174	Pos Early
826	305	15581	146484	Carbohydrate	Pentose Metabolism	1284	NAMED	PYMYPHUHKUWMLA-VPENINKCSA-N	O=C[C@@H]([C@H]([C@@H](CO)O)O)O	xylose	xylose	609-06-3	85957	HMDB0000098	C00181	135191	Polar
827	400	514	155308	Nucleotide	Pyrimidine Metabolism, Cytidine containing	4272	NAMED	UHDGCWIWMRVCDJ-XVFCMESISA-N	OC[C@@H]1[C@H]([C@H]([C@H](N2C(N=C(C=C2)N)=O)O1)O)O	cytidine	cytidine	65-46-3	5940	HMDB0000089	C00475	6175	Pos Early
828	305	575	146408	Carbohydrate	Pentose Metabolism	1286	NAMED	SRBFZHDQGSBBOR-SQOUGZDYSA-N	O[C@@H]1CO[C@@H](O)[C@@H](O)[C@@H]1O	arabinose	arabinose	28697-53-2	59687	HMDB0029942	C00216	66308	Polar
869	400	2856	155482	Nucleotide	Pyrimidine Metabolism, Uracil containing	4235	NAMED	DJJCXFVJDGTHFX-XVFCMESISA-N	O[C@]1([H])[C@@](O)([H])[C@](COP(O)(O)=O)([H])O[C@]1(N(C=C2)C(NC2=O)=O)[H]	uridine 5'-monophosphate (UMP)	UMP	3387-36-8	1399139	HMDB0000288	C00105	6030	Pos Early
872	209	2183	124827	Nucleotide	Pyrimidine Metabolism, Thymine containing	4295	NAMED	IQFYYKKMVGJFEH-XLPZGREQSA-N	O=C(NC(C(C)=C1)=O)N1[C@]2([C@@]([C@@]([C@@](CO)(O2)[H])(O)[H])([H])[H])[H]	thymidine	thymidine	50-89-5	5585	HMDB0000273	C00214	5789	Neg
873	400	5341	155495	Cofactors and Vitamins	Thiamine Metabolism	4442	NAMED	OHQKBYLHTFYNQF-UHFFFAOYSA-N	NC1=C(C[N+]2=CSC(CC[O-])=C2C)C=NC(C)=N1	thiamin (vitamin B1)	thiamin (vitamin B1)	59-43-8		HMDB0000235	DG00125,C00378,D08580	1130	Pos Early
878	305	577	146410	Carbohydrate	Fructose, Mannose and Galactose Metabolism	1364	NAMED	RFSUNEUAIZKAJO-ARQDHWQXSA-N	OC[C@@]1(O)O[C@H](CO)[C@@H](O)[C@@H]1O	fructose	fructose	57-48-7	5764	HMDB0000660	C00095	2723872	Polar
880	400	554	155319	Nucleotide	Purine Metabolism, Adenine containing	4168	NAMED	GFFGJBXGBJISGV-UHFFFAOYSA-N	NC1=NC=NC2=C1N=CN2	adenine	adenine	73-24-5	185	HMDB0000034	C00147	190	Pos Early
881	400	573	155326	Nucleotide	Pyrimidine Metabolism, Cytidine containing	4273	NAMED	OPTASPLRGRRNAP-UHFFFAOYSA-N	NC1=NC(NC=C1)=O	cytosine	cytosine	71-30-7	577	HMDB0000630	C00380	597	Pos Early
882	209	604	126810	Nucleotide	Pyrimidine Metabolism, Thymine containing	4298	NAMED	RWQNBRDOKXIBIV-UHFFFAOYSA-N	O=C1C(C)=CNC(N1)=O	thymine	thymine	65-71-4	1103	HMDB0000262	C00178	1135	Neg
888	209	1642	125736	Lipid	Medium Chain Fatty Acid	1512	NAMED	GHVNFZFCNZKVNT-UHFFFAOYSA-N	CCCCCCCCCC(O)=O	caprate (10:0)	caprate (10:0)	334-48-5	2863	HMDB0000511	C01571	2969	Neg
891	209	1121	125718	Lipid	Long Chain Saturated Fatty Acid	1530	NAMED	KEMQGTRYUADPNZ-UHFFFAOYSA-N	O=C(O)CCCCCCCCCCCCCCCC	margarate (17:0)	margarate (17:0)	506-12-7	10033	HMDB0002259		10465	Neg
892	209	1356	125722	Lipid	Long Chain Saturated Fatty Acid	1534	NAMED	ISYWECDDZWTKFF-UHFFFAOYSA-N	CCCCCCCCCCCCCCCCCCC(O)=O	nonadecanoate (19:0)	nonadecanoate (19:0)	646-30-0	12071	HMDB0000772	C16535	12591	Neg
893	209	1118	125716	Lipid	Long Chain Saturated Fatty Acid	1535	NAMED	VKOBVWXKNCXXDE-UHFFFAOYSA-N	CCCCCCCCCCCCCCCCCCCC(O)=O	arachidate (20:0)	arachidate (20:0)	506-30-9	10035	HMDB0002212	C06425	10467	Neg
913	305	15586	146486	Carbohydrate	Glycogen Metabolism	1317	NAMED	GUBGYTABKSRVRQ-ASMJPISFSA-N	O[C@@H]1[C@H]([C@H](O[C@@H]([C@H]1O)CO)O[C@H]2[C@@H]([C@H]([C@H](O[C@@H]2CO)O)O)O)O	maltose	maltose	6363-53-7	388469	HMDB0000163	C00208	10991489	Polar
914	305	1471	147709	Carbohydrate	Pentose Metabolism	1278	NAMED	PYMYPHUHKUWMLA-LMVFSUKVSA-N	O=C[C@@H]([C@@H]([C@@H](CO)O)O)O	ribose	ribose	50-69-1	4470639	HMDB0000283	C00121	5779	Polar
917	400	512	155306	Amino Acid	Alanine and Aspartate Metabolism	40	NAMED	DCXYFEDJOCDNAF-REOHCLBHSA-N	NC(C[C@H](N)C(O)=O)=O	asparagine	asparagine	70-47-3	6031	HMDB0000168	C00152	6267	Pos Early
923	305	601	145712	Nucleotide	Pyrimidine Metabolism, Orotate containing	4227	NAMED	UFIVEPVSAGBUSI-UHFFFAOYSA-N	O=C(C(NC1=O)CC(N1)=O)O	dihydroorotate	dihydroorotate	155-54-4	628	HMDB03349	C00337	648	Polar
925	209	1644	125738	Lipid	Medium Chain Fatty Acid	1508	NAMED	MNWFXJYAOYHMED-UHFFFAOYSA-N	CCCCCCC(O)=O	heptanoate (7:0)	heptanoate (7:0)	111-14-8	7803	HMDB0000666	C17714	8094	Neg
926	209	32489	125850	Lipid	Medium Chain Fatty Acid	1507	NAMED	FUZZWVXGSFPDMH-UHFFFAOYSA-N	CCCCCC(O)=O	caproate (6:0)	caproate (6:0)	142-62-1	8552	HMDB0000535	C01585	8892	Neg
932	209	32492	125852	Lipid	Medium Chain Fatty Acid	1509	NAMED	WWZKQHOCKIZLMA-UHFFFAOYSA-N	CCCCCCCC(O)=O	caprylate (8:0)	caprylate (8:0)	124-07-2	370	HMDB0000482	C06423	379	Neg
935	305	1519	147116	Carbohydrate	Disaccharides and Oligosaccharides	1343	NAMED	CZMRCDWAGMRECN-UGDNZRGBSA-N	OC[C@]1(O[C@@H]2[C@@H]([C@H]([C@@H]([C@H](O2)CO)O)O)O)[C@H]([C@@H]([C@@H](CO)O1)O)O	sucrose	sucrose	57-50-1	5768	HMDB0000258	C00089	5988	Polar
980	209	1361	125726	Lipid	Long Chain Saturated Fatty Acid	1527	NAMED	WQEPLUUGTLDZJY-UHFFFAOYSA-N	O=C(O)CCCCCCCCCCCCCC	pentadecanoate (15:0)	pentadecanoate (15:0)	10002-84-2,1002-84-2	13249	HMDB0000826	C16537	13849	Neg
1001	400	32306	155905	Amino Acid	Urea cycle; Arginine and Proline Metabolism	520	NAMED	PMMYEEVYMWASQN-DMTCNVIQSA-N	O[C@@H]1C[C@@H](C(O)=O)NC1	trans-4-hydroxyproline	hydroxyproline	51-35-4	5605	HMDB0000725	C01157	5810	Pos Early
1002	305	1107	146424	Nucleotide	Purine Metabolism, (Hypo)Xanthine/Inosine containing	4154	NAMED	POJWUDADGALRAB-UHFFFAOYSA-N	O=C(N1)C(NC(N)=O)NC1=O	allantoin	allantoin	97-59-6	199	HMDB0000462	C02348,C01551,C02350	439714,204,439713	Polar
1004	209	3147	123237	Nucleotide	Purine Metabolism, (Hypo)Xanthine/Inosine containing	4142	NAMED	LRFVTYWOQMYALW-UHFFFAOYSA-N	O=C(N1)C(N=CN2)=C2NC1=O	xanthine	xanthine	69-89-6	1151	HMDB0000292	C00385	1188	Neg
1021	209	1494	123209	Amino Acid	Glutathione Metabolism	587	NAMED	ODHCTXKNWHHXJC-VKHMYHEASA-N	O=C1CC[C@@H]([C@@](O)=O)N1	5-oxoproline	5-oxoproline	98-79-3	7127	HMDB0000267	C02237,C01879	439685,7405	Neg
1022	400	1512	155387	Amino Acid	Tryptophan Metabolism	287	NAMED	SIOXPEMLGUPBBT-UHFFFAOYSA-N	O=C(O)C1=NC=CC=C1	picolinate	picolinate	98-98-6	993	HMDB0002243	C10164	1018	Pos Early
1023	400	1516	155390	Amino Acid	Glycine, Serine and Threonine Metabolism	5	NAMED	FSYKKLYZXJSNPZ-UHFFFAOYSA-N	CNCC(O)=O	sarcosine	sarcosine	107-97-1	1057	HMDB0000271	C00213	1088	Pos Early
1024	209	1508	124797	Cofactors and Vitamins	Pantothenate and CoA Metabolism	4358	NAMED	GHOKWGTUZJEAQD-ZETCQYMHSA-N	O=C(NCCC(O)=O)[C@H](O)C(C)(C)CO	pantothenate	pantothenate (Vitamin B5)	137-08-6	6361	HMDB0000210	C00864	6613	Neg
1025	400	1444	155369	Amino Acid	Lysine Metabolism	133	NAMED	HXEACLLIILLPRG-UHFFFAOYSA-N	OC(C1NCCCC1)=O	pipecolate	pipecolate	4043-87-2		HMDB0000070			Pos Early
1026	400	1600	155428	Lipid	Phospholipid Metabolism	2256	NAMED	SUHOOTKUPISOBE-UHFFFAOYSA-N	NCCOP(O)(O)=O	phosphoethanolamine	phosphoethanolamine (PE)	1071-23-4	990	HMDB0000224	C00346	1015	Pos Early
1052	305	1572	146444	Carbohydrate	Glycolysis, Gluconeogenesis, and Pyruvate Metabolism	1260	NAMED	RBNPOMFGQQGHHO-UHFFFAOYSA-N	O=C(O)C(O)CO	glycerate	glycerate	600-19-1	732	HMDB0000139,HMDB0006372	C00258	439194,752	Polar
1053	400	3155	155489	Nucleotide	Pyrimidine Metabolism, Uracil containing	4259	NAMED	JSJWCHRYRHKBBW-UHFFFAOYSA-N	OC(CCNC(N)=O)=O	3-ureidopropionate	3-ureidopropionate	462-88-4	109	HMDB0000026	C02642	111	Pos Early
1082	209	1587	126818	Amino Acid	Leucine, Isoleucine and Valine Metabolism	341	NAMED	WXNXCEHXYPACJF-ZETCQYMHSA-N	O=C(O)[C@H](CC(C)C)NC(C)=O	N-acetylleucine	N-acetylleucine	1188-21-2	64075	HMDB0011756	C02710	70912	Neg
1083	209	1589	124587	Amino Acid	Methionine, Cysteine, SAM and Taurine Metabolism	441	NAMED	XUYPXLNMDZIRQH-LURJTMIESA-N	O=C(O)[C@H](CCSC)NC(C)=O	N-acetylmethionine	N-acetylmethionine	65-82-7	395338	HMDB0011745	C02712	448580	Neg
1084	209	1591	124807	Amino Acid	Leucine, Isoleucine and Valine Metabolism	422	NAMED	IHYJTAOFMMMOPX-LURJTMIESA-N	O=C(O)[C@@H](NC(C)=O)C(C)C	N-acetylvaline	N-acetylvaline	96-81-1	60154	HMDB0011757		66789	Neg
1087	209	1552	125983	Lipid	Long Chain Monounsaturated Fatty Acid	1565	NAMED	DPUOLQHDNGRHBS-KTKRTIGZSA-N	OC(CCCCCCCCCCC\C=C/CCCCCCCC)=O	erucate (22:1n9)	erucate (22:1n9)	112-86-7	7924	HMDB0002068	C08316	8216,5281116	Neg
1090	402	43807	159596	Cofactors and Vitamins	Hemoglobin and Porphyrin Metabolism	4430	NAMED	BPYKTIZUTYGOLE-KDUUSRDASA-N	CC(C(N\1)=O)=C(C=C)C1=C/C2=C(C)C(CCC(O)=O)=C(CC3=C(CCC(O)=O)C(C)=C(/C=C4NC(C(C=C)=C/4C)=O)N3)N2	bilirubin (Z,Z)	bilirubin	635-65-4	4444055	HMDB0000054	C00486	5280352	Pos Late
1094	209	2761	161549	Amino Acid	Tyrosine Metabolism	250	NAMED	XUIIKFGFIJCVMT-LBPRGKRZSA-N	OC1=C(I)C=C(OC2=C(I)C=C(C[C@H](N)C(O)=O)C=C2I)C=C1I	thyroxine	thyroxine	51-48-9	5614	HMDB0000248	C01829	5819	Neg
1099	209	1573	124583	Nucleotide	Purine Metabolism, Guanine containing	4203	NAMED	NYHBQMYGNKIUIF-UUOKFMHZSA-N	O=C1C(N=CN2[C@@]3([H])[C@@](O)([H])[C@@](O)([H])[C@](CO)([H])O3)=C2N=C(N)N1	guanosine	guanosine	118-00-3	6544	HMDB0000133	C00387	6802	Neg
1102	209	2734	123231	Peptide	Gamma-glutamyl Amino Acid	662	NAMED	VVLXCWVSSLFQDS-QWRGUYRKSA-N	OC(C=C1)=CC=C1C[C@@H](C(O)=O)NC(CC[C@@H](C(O)=O)N)=O	gamma-glutamyltyrosine	gamma-glutamyltyrosine	7432-23-7	85142	HMDB0011741		94340	Neg
1104	400	1584	155418	Xenobiotics	Food Component/Plant	4987	NAMED	KTHADMDGDNYQRX-UHFFFAOYSA-N	O=C(OC)CC1=CNC2=C1C=CC=C2	methyl indole-3-acetate	methyl indole-3-acetate	1912-33-0	67279	HMDB0029738		74706	Pos Early
1105	402	1561	164189	Cofactors and Vitamins	Tocopherol Metabolism	4382	NAMED	GVJHHUAWPYXKBD-IEOSBIPESA-N	CC1=C2C(O[C@@](CCC[C@H](C)CCC[C@H](C)CCC[C@H](C)C)(C)CC2)=C(C)C(C)=C1O	alpha-tocopherol	alpha-tocopherol	10191-41-0,59-02-9	14265	HMDB0001893	C02477	86472	Pos Late
1110	305	1585	147717	Amino Acid	Alanine and Aspartate Metabolism	31	NAMED	KTHDTJVBEPMMGL-VKHMYHEASA-N	O=C(O)[C@@H](NC(C)=O)C	N-acetylalanine	N-acetylalanine	97-69-8	79449	HMDB0000766	C02847	88064	Polar
1113	400	1558	155399	Amino Acid	Polyamine Metabolism	568	NAMED	UZTFMUBKZQVKLK-UHFFFAOYSA-N	CC(NCCCC(O)=O)=O	4-acetamidobutanoate	4-acetamidobutanoate	3025-96-5	17180	HMDB0003681	C02946	18189	Pos Early
1114	400	1566	155405	Nucleotide	Pyrimidine Metabolism, Thymine containing	4304	NAMED	QCHPKSFMDHPSNR-UHFFFAOYSA-N	O=C(O)C(C)CN	3-aminoisobutyrate	3-aminoisobutyrate	214139-20-5,10569-72-9	58481	HMDB0002166	C05145	64956	Pos Early
1124	209	1564	124575	Energy	TCA Cycle	1457	NAMED	KRKNYBCHXYNGOX-UHFFFAOYSA-N	OC(CC(CC(O)=O)(O)C(O)=O)=O	citrate	citrate	77-92-9	305	HMDB0000094	C00158	311	Neg
1125	209	1559	124573	Nucleotide	Pyrimidine Metabolism, Uracil containing	4252	NAMED	OIVLITBTBDPEFK-UHFFFAOYSA-N	O=C(CCN1)NC1=O	5,6-dihydrouracil	5,6-dihydrouracil	504-07-4	629	HMDB0000076	C00429	649	Neg
1128	400	42374	156916	Amino Acid	Glutathione Metabolism	588	NAMED	QWCKQJZIFLGMSD-GSVOUGTGSA-N	N[C@H](CC)C(O)=O	2-aminobutyrate	2-aminobutyrate	1492-24-6	388757	HMDB0000452	C02356	80283	Pos Early
1134	209	1604	124593	Nucleotide	Purine Metabolism, (Hypo)Xanthine/Inosine containing	4152	NAMED	LEHOTFFKMJEONL-UHFFFAOYSA-N	O=C1NC(NC(NC2=O)=O)=C2N1	urate	urate	120K5305,69-93-2		HMDB0000289	C00366	1175	Neg
1135	209	1605	125991	Lipid	Secondary Bile Acid Metabolism	3525	NAMED	RUDATBOHQWOJDD-UZVSRGJWSA-N	O[C@@H]1[C@@]2([H])[C@]3([H])CC[C@@]([C@@H](CCC(O)=O)C)([H])[C@@]3(C)CC[C@]2([H])[C@@]4(C)CC[C@@H](O)C[C@@]4([H])C1	ursodeoxycholate	ursodeoxycholate	128-13-2	29131	HMDB0000946	C07880	31401	Neg
1137	209	38102	127707	Lipid	Endocannabinoid	2177	NAMED	BOWVQLFMWHZBEF-KTKRTIGZSA-N	O=C(NCCO)CCCCCCC/C=C\CCCCCCCC	oleoyl ethanolamide	oleoyl ethanolamide	111-58-0,11-58-0	4446574	HMDB0002088		5283454	Neg
1140	400	2730	155470	Peptide	Gamma-glutamyl Amino Acid	651	NAMED	JBFYFLXEJFQWMU-WDSKDSINSA-N	O=C(N)CC[C@@H](C(O)=O)NC(CC[C@@H](C(O)=O)N)=O	gamma-glutamylglutamine	gamma-glutamylglutamine	10148-81-9	133013	HMDB0011738	C05283	150914	Pos Early
1141	209	1669	124595	Amino Acid	Tyrosine Metabolism	180	NAMED	KKADPXVIOXHVKN-UHFFFAOYSA-N	OC1=CC=C(CC(C(O)=O)=O)C=C1	4-hydroxyphenylpyruvate	4-hydroxyphenylpyruvate	156-39-8	954	HMDB0000707	C01179	979	Neg
1143	209	40605	223227	Lipid	Short Chain Fatty Acid	1505	NAMED	FERIUCNNQQJTOY-UHFFFAOYSA-N	OC(CCC)=O	butyrate/isobutyrate (4:0)	butyrate/isobutyrate (4:0)	109-92-6	259	HMDB0000039	C00246	264	Neg
1161	400	1598	155427	Amino Acid	Leucine, Isoleucine and Valine Metabolism	407	NAMED	WRUSVQOKJIDBLP-HWKANZROSA-N	O=C(O)CNC(/C(C)=C/C)=O	tigloylglycine	tigloylglycine	35842-45-6	4945715	HMDB0000959		6441567	Pos Early
1162	305	32377	147564	Carbohydrate	Aminosugar Metabolism	1436	NAMED	SQVRNKJHWKZAKO-UHFFFAOYSA-N	OC1(C(O)=O)CC(O)C(NC(C)=O)C(C(O)C(O)CO)O1	N-acetylneuraminate	N-acetylneuraminate	131-48-6	10292217	HMDB0000230	C00270	439197	Polar
1206	400	12110	155516	Energy	TCA Cycle	1461	NAMED	ODBLHEXUDAPZAU-OKKQSCSOSA-N	OC(C[C@@H]([C@H](O)C(O)=O)[C@@](O)=O)=O	isocitrate	isocitrate	20226-99-7	1161	HMDB0001874	C00451	5318532	Pos Early
1212	305	15741	147960	Carbohydrate	Aminosugar Metabolism	1430	NAMED	FZLJPEPAYPUMMR-FMDGEEDCSA-N	O[C@H]1[C@H](O)[C@@H](CO)O[C@H](OP(O)(O)=O)[C@@H]1NC(C)=O	N-acetyl-glucosamine 1-phosphate	N-acetyl-glucosamine 1-phosphate	31281-59-1	389323	HMDB0001367	C04256	440364	Polar
1213	305	15107	147950	Carbohydrate	Aminosugar Metabolism	1429	NAMED	BRGMHAYQAZFZDJ-FMDGEEDCSA-N	O[C@@H]1O[C@H](COP(O)(O)=O)[C@@H](O)[C@H](O)[C@H]1NC(C)=O	N-acetylglucosamine 6-phosphate	N-acetylglucosamine 6-phosphate	102029-88-9	8216065	HMDB0002817	C00357	439219	Polar
1215	400	48149	157725	Carbohydrate	Aminosugar Metabolism	1448	NAMED	YTTRPBWEMMPYSW-VFFCQLMOSA-N	O[C@H]1[C@H](O)[C@@H](CO)O[C@@H](NC(CC(N)C(O)=O)=O)[C@@H]1NC(C)=O	N-acetylglucosaminylasparagine	N-acetylglucosaminylasparagine	2776-93-4	21403014	HMDB0000489	C04540	123826	Pos Early
1221	400	27718	155838	Amino Acid	Creatine Metabolism	536	NAMED	CVSVTCORWBXHQV-UHFFFAOYSA-N	CN(C(N)=N)CC(O)=O	creatine	creatine	57-00-1	566	HMDB0000064	C00300	586	Pos Early
1231	209	17805	126039	Lipid	Long Chain Polyunsaturated Fatty Acid (n3 and n6)	1588	NAMED	XSXIVVZCUAHUJO-HZJYTTRNSA-N	O=C(O)CCCCCCCCC/C=C\C/C=C\CCCCC	dihomo-linoleate (20:2n6)	dihomolinoleate (20:2n6)	2091-39-6	4944228	HMDB0005060	C16525	6439848	Neg
1235	400	18245	155638	Peptide	Gamma-glutamyl Amino Acid	653	NAMED	PXVCMZCJAUJLJP-YUMQZZPRSA-N	O=C(O)[C@@H](N)CCC(N[C@@H](CC1=CNC=N1)C(O)=O)=O	gamma-glutamylhistidine	gamma-glutamylhistidine	37460-15-4	5380197	HMDB0029151		7017195	Pos Early
1242	400	15650	155564	Nucleotide	Purine Metabolism, Adenine containing	4174	NAMED	GFYLSDSUCHVORB-IOSLPCCCSA-N	N=C1C2=C(N([C@@]3([H])[C@@](O)([H])[C@@](O)([H])[C@](CO)([H])O3)C=N2)N=CN1C	N1-methyladenosine	1-methyladenosine	15763-06-1	4573813	HMDB0003331	C02494	27476	Pos Early
1254	209	15122	126021	Lipid	Glycerolipid Metabolism	2861	NAMED	PEDCQBHIVMGVHV-UHFFFAOYSA-N	OC(CO)CO	glycerol	glycerol	56-81-5	733	HMDB0000131	C00116	753	Neg
1256	400	15506	155556	Lipid	Phospholipid Metabolism	2250	NAMED	CRBHXDCYXIISFC-UHFFFAOYSA-N	[O-]CC[N+](C)(C)C	choline	choline	67-48-1	149278	HMDB0000097	C00114	305	Pos Early
1258	400	4970	155491	Amino Acid	Tryptophan Metabolism	280	NAMED	RWZYAGGXGHYGMB-UHFFFAOYSA-N	OC(C1=CC=CC=C1N)=O	anthranilate	anthranilate	118-92-3	222	HMDB0001123	C00108	227	Pos Early
1259	209	12115	152424	Xenobiotics	Food Component/Plant	4875	NAMED	WBYWAXJHAXSJNI-VOTSOKGWSA-N	OC(/C=C/C1=CC=CC=C1)=O	cinnamate	cinnamate	140-10-3	392447	HMDB0000930	C00423	444539	Neg
1261	209	57393	210941	Lipid	Eicosanoid	2166	NAMED	KUKJHGXXZWHSBG-WBGSEQOASA-N	O[C@@H](CCCCC)/C=C/C=C/C/C=C\CCCC(O)=O	12-HHTrE	12-HHTrE	54397-84-1	4446265	HMDB0012535	C20388	5283141	Neg
1268	400	18369	155662	Peptide	Gamma-glutamyl Amino Acid	655	NAMED	MYFMARDICOWMQP-YUMQZZPRSA-N	CC(C)C[C@@H](C(O)=O)NC(CC[C@@H](C(O)=O)N)=O	gamma-glutamylleucine	gamma-glutamylleucine	2566-39-4	133115	HMDB0011171		151023	Pos Early
1308	209	17807	144966	Lipid	Eicosanoid	2098	NAMED	XNRNNGPBEPRNAR-JQBLCGNGSA-N	OC(O1)C[C@H](O)[C@H](C/C=C\CCCC(O)=O)[C@H]1/C=C/[C@@H](O)CCCCC	thromboxane B2	thromboxane B2	54397-85-2	4446261	HMDB0003252	C05963	5283137	Neg
1312	400	22152	155794	Cofactors and Vitamins	Nicotinate and Nicotinamide Metabolism	4327	NAMED	DAYLJWODMCOQEW-TURQNECASA-N	O[C@@H]1[C@@H](COP([O-])(O)=O)O[C@@H]([N@@+]2=CC=CC(C(N)=O)=C2)[C@@H]1O	nicotinamide ribonucleotide (NMN)	nicotinamide ribonucleotide (NMN)	1094-61-7	13553	HMDB0000229	C00455	14180	Pos Early
1342	400	12017	155509	Amino Acid	Tyrosine Metabolism	209	NAMED	PFDUUKDQEHURQC-ZETCQYMHSA-N	COC1=C(O)C=CC(C[C@@H](C(O)=O)N)=C1	3-methoxytyrosine	3-methoxytyrosine	300-48-1	8948	HMDB0001434		9307	Pos Early
1488	402	32463	158509	Lipid	Endocannabinoid	2185	NAMED	LGEQQWMQCRIYKG-DOFZRALJSA-N	O=C(NCCO)CCC/C=C\C/C=C\C/C=C\C/C=C\CCCCC	arachidonoyl ethanolamide	arachidonoyl ethanolamide	94421-68-8	4445241	HMDB0004080	C11695	5281969	Pos Late
1489	209	38165	127721	Lipid	Endocannabinoid	2180	NAMED	HXYVTAGFYLMHSO-UHFFFAOYSA-N	CCCCCCCCCCCCCCCC(NCCO)=O	palmitoyl ethanolamide	palmitoyl ethanolamide	544-31-0	4509	HMDB0002100	C16512	4671	Neg
1518	402	44877	164219	Lipid	Ceramides	3041	NAMED	YDNKGFDKKRUKPY-TURZORIXSA-N	OC[C@@H]([C@H](O)/C=C/CCCCCCCCCCCCC)NC(CCCCCCCCCCCCCCC)=O	N-palmitoyl-sphingosine (d18:1/16:0)	N-palmitoyl-sphingosine (d18:1/16:0)	24696-26-2	4446677	HMDB0004949		5283564	Pos Late
1526	402	19263	164198	Lipid	Phosphatidylethanolamine (PE)	2426	NAMED	FHQVHHIBKUMWTI-OTMQOFQLSA-N	CCCCCCCC\C=C/CCCCCCCC(O[C@](COC(CCCCCCCCCCCCCCC)=O)(COP([O-])(OCC[N+]([H])([H])[H])=O)[H])=O	1-palmitoyl-2-oleoyl-GPE (16:0/18:1)	1-palmitoyl-2-oleoyl-GPE (16:0/18:1)	26662-94-2	4446615	HMDB0005320		5283496	Pos Late
1528	402	52450	210818	Lipid	Phosphatidylinositol (PI)	2554	NAMED	BSNJSZUDOMPYIR-DMDPBSJXSA-N	O=C(CCCCCCC/C=C\C/C=C\CCCCC)O[C@@H](COP(OC1C(O)C(O)C(O)C(O)C1O)(O)=O)COC(CCCCCCCCCCCCCCC)=O	1-palmitoyl-2-linoleoyl-GPI (16:0/18:2)	1-palmitoyl-2-linoleoyl-GPI (16:0/18:2)		21403024	HMDB0009784		46891795	Pos Late
1537	402	42446	165129	Lipid	Phosphatidylcholine (PC)	2304	NAMED	JLPULHDHAOZNQI-ZTIMHPMXSA-N	O=P([O-])(OC[C@@H](COC(CCCCCCCCCCCCCCC)=O)OC(CCCCCCC/C=C\C/C=C\CCCCC)=O)OCC[N+](C)(C)C	1-palmitoyl-2-linoleoyl-GPC (16:0/18:2)	1-palmitoyl-2-linoleoyl-GPC (16:0/18:2)	40811-94-7	4450224	HMDB0007973		5287971	Pos Late
1538	402	19503	164530	Lipid	Sphingomyelins	3126	NAMED	LKQLRGMMMAHREN-YJFXYUILSA-N	CCCCCCCCCCCCCCCCCC(N[C@@](COP([O-])(OCC[N+](C)(C)C)=O)([C@](O)(/C=C/CCCCCCCCCCCCC)[H])[H])=O	stearoyl sphingomyelin (d18:1/18:0)	stearoyl sphingomyelin (d18:1/18:0)	85187-10-6,85187-10-6	4956085	HMDB0001348	C00550	6453725	Pos Late
1539	402	52461	165127	Lipid	Phosphatidylcholine (PC)	2301	NAMED	WTJKGGKOPKCXLL-PFDVCBLKSA-N	O=C(CCCCCCC/C=C\CCCCCCCC)O[C@@H](COC(CCCCCCCCCCCCCCC)=O)COP(OCC[N+](C)(C)C)([O-])=O	1-palmitoyl-2-oleoyl-GPC (16:0/18:1)	1-palmitoyl-2-oleoyl-GPC (16:0/18:1)	26853-31-6,26853-31-6	4940699	HMDB0007972	C13875	6436017	Pos Late
1547	402	54979	208064	Lipid	Ceramides	3045	NAMED	VODZWWMEJITOND-NXCSZAMKSA-N	OC[C@H](NC(CCCCCCCCCCCCCCCCC)=O)[C@H](O)/C=C/CCCCCCCCCCCCC	N-stearoyl-sphingosine (d18:1/18:0)*	N-stearoyl-sphingosine (d18:1/18:0)*	104404-17-3	4446678	HMDB0004950		5283565	Pos Late
1548	209	12358	124841	Cofactors and Vitamins	Tetrahydrobiopterin Metabolism	4412	NAMED	LHQIJBMDNUYRAM-AWFVSMACSA-N	O=C1C2=NC([C@H](O)[C@H](O)C)=CNC2=NC(N)=N1	biopterin	biopterin	22150-76-1	392795	HMDB0000468	C06313	445040	Neg
1629	209	18494	124667	Lipid	Primary Bile Acid Metabolism	3483	NAMED	BHTRKEVKTKCXOH-BJLOMENOSA-N	C[C@@]12[C@@]([H])(CC[C@@]2([C@@H](CCC(NCCS(O)(=O)=O)=O)C)[H])[C@@]([C@@H](C[C@]3([H])C[C@H](O)CC4)O)([H])[C@]([C@]34C)([H])CC1	taurochenodeoxycholate	taurochenodeoxycholate	6009-98-9	343282	HMDB0000951	C05465	387316	Neg
1648	209	18497	125762	Lipid	Primary Bile Acid Metabolism	3476	NAMED	WBWWGRHZICKQGZ-HGVCTONRSA-N	C[C@@]12[C@@]([H])(CC[C@]2([H])[C@@H](CCC(NCCS(O)(=O)=O)=O)C)[C@@]([C@H](O)C[C@@]3([H])[C@@]4(CC[C@@H](O)C3)C)([H])[C@@]4([H])C[C@@H]1O	taurocholate	taurocholate	145-42-6		HMDB0000036	C05122	6675,46783527	Neg
1668	209	12261	124839	Lipid	Secondary Bile Acid Metabolism	3510	NAMED	AWDRATDZQPNJFN-RZGBOAIJSA-N	C[C@@]12[C@@]([H])(CC[C@]2([H])[C@@H](CCC(NCCS(O)(=O)=O)=O)C)[C@@](CC[C@@]3([H])[C@@]4(CC[C@@H](O)C3)C)([H])[C@@]4([H])C[C@@H]1O	taurodeoxycholate	taurodeoxycholate	207737-97-1	2015539	HMDB0000896	C05463	2733768	Neg
1869	305	18281	145774	Xenobiotics	Benzoate Metabolism	4488	NAMED	ONJSZLXSECQROL-UHFFFAOYSA-N	O=C(C1=CC=CC=C1O)NCC(O)=O	2-hydroxyhippurate (salicylurate)	2-hydroxyhippurate (salicylurate)	487-54-7	9835	HMDB0000840	C07588	10253	Polar
2029	209	18362	124661	Lipid	Fatty Acid, Dicarboxylate	1697	NAMED	BDJRBEYXGGNYIS-UHFFFAOYSA-N	O=C(O)CCCCCCCC(O)=O	azelate (C9-DC)	azelate (C9-DC)	123-99-9	2179	HMDB0000784	C08261	2266	Neg
2050	209	18467	126840	Lipid	Long Chain Polyunsaturated Fatty Acid (n3 and n6)	1578	NAMED	JAZBEHYOTPTENJ-JLNKQSITSA-N	O=C(O)CCC\C=C/C/C=C\C/C=C\C/C=C\C/C=C\CC	eicosapentaenoate (EPA; 20:5n3)	eicosapentaenoate (EPA; 20:5n3)	10-2005-9,10417-94-4	393682	HMDB0001999	C06428	446284	Neg
2051	305	15745	146490	Amino Acid	Leucine, Isoleucine and Valine Metabolism	415	NAMED	WXUAQHNMJWJLTG-UHFFFAOYSA-N	CC(C(O)=O)CC(O)=O	methylsuccinate	methylsuccinate	498-21-5	9922	HMDB0001844		10349	Polar
2053	305	15729	147741	Energy	TCA Cycle	1474	NAMED	KQTIIICEAUMSDG-UHFFFAOYSA-N	OC(CC(C(O)=O)CC(O)=O)=O	tricarballylate	tricarballylate	99-14-9	14220	HMDB0031193	C19806	14925	Polar
2054	305	15765	147158	Amino Acid	Leucine, Isoleucine and Valine Metabolism	412	NAMED	UKFXDFUAPNAMPJ-UHFFFAOYSA-N	CCC(C(O)=O)C(O)=O	ethylmalonate	ethylmalonate	601-75-2	11263	HMDB0000622		11756	Polar
100000007	400	15500	155554	Lipid	Carnitine Metabolism	1950	NAMED	PHIQHXFUZVPYII-ZCFIWIBFSA-N	[O-]C(C[C@@H](O)C[N+](C)(C)C)=O	carnitine	carnitine	461-05-2	10455	HMDB0000062	C00487,C00308	288	Pos Early
100000008	209	15778	124867	Xenobiotics	Benzoate Metabolism	4499	NAMED	WPYMKLBDIGXBTP-UHFFFAOYSA-N	OC(C1=CC=CC=C1)=O	benzoate	benzoate	65-85-0	238	HMDB0001870	C00180	243	Neg
100000010	209	15749	126035	Xenobiotics	Benzoate Metabolism	4597	NAMED	XMIIGOLPHOKFCH-UHFFFAOYSA-N	OC(CCC1=CC=CC=C1)=O	3-phenylpropionate (hydrocinnamate)	3-phenylpropionate (hydrocinnamate)	501-52-0	10181339	HMDB0000764	C05629	107	Neg
100000014	209	15753	124647	Xenobiotics	Benzoate Metabolism	4484	NAMED	QIAFMBKCNZACKA-UHFFFAOYSA-N	O=C(C1=CC=CC=C1)NCC(O)=O	hippurate	hippurate	495-69-2	451	HMDB0000714	C01586	464	Neg
100000015	400	15679	155571	Amino Acid	Tryptophan Metabolism	283	NAMED	FBZONXHGGPHHIY-UHFFFAOYSA-N	OC1=C2C(C(O)=CC(C(O)=O)=N2)=CC=C1	xanthurenate	xanthurenate	59-007	5497	HMDB0000881	C02470	5699	Pos Early
100000016	209	15730	123269	Lipid	Fatty Acid, Dicarboxylate	1694	NAMED	TYFQFVWCELRYAO-UHFFFAOYSA-N	OC(CCCCCCC(O)=O)=O	suberate (C8-DC)	suberate (C8-DC)	505-48-6	10025	HMDB0000893	C08278	10457	Neg
100000036	209	15676	123263	Amino Acid	Leucine, Isoleucine and Valine Metabolism	399	NAMED	JVQYSWDUAOAHFM-UHFFFAOYSA-N	CCC(C)C(C(O)=O)=O	3-methyl-2-oxovalerate	3-methyl-2-oxovalerate	51829-07-3,1460-34-0	46	HMDB0000491	C03465,C06008,C00671	439286,440877	Neg
100000039	400	18374	155665	Amino Acid	Methionine, Cysteine, SAM and Taurine Metabolism	446	NAMED	QEFRNWWLZKMPFJ-YGVKFDHGSA-N	O=C(O)[C@@H](N)CCS(C)=O	methionine sulfoxide	methionine sulfoxide	3226-65-1	139840	HMDB0002005	C02989	158980	Pos Early
100000042	209	15677	123265	Amino Acid	Histidine Metabolism	74	NAMED	JDHILDINMRGULE-LURJTMIESA-N	N[C@H](C(O)=O)CC1=CN=CN1C	3-methylhistidine	3-methylhistidine	368-16-1	58494	HMDB0000479	C01152	64969	Neg
100000044	400	15747	155593	Amino Acid	Histidine Metabolism	89	NAMED	MYYIAHXIVFADCU-QMMMGPOBSA-N	CN1C=NC=C1C[C@@H]([C@@](O)=O)NC(CCN)=O	anserine	anserine	10030-52-1	100482	HMDB0000194	C01262	112072	Pos Early
100000054	400	15685	155573	Amino Acid	Lysine Metabolism	121	NAMED	YSMODUONRAFBET-AKGZTFGVSA-N	N[C@@H](CCC(O)CN)C(O)=O	5-hydroxylysine	5-hydroxylysine	13204-98-3	1002	HMDB0000450	C16741	3032849	Pos Early
100000092	305	15306	145760	Carbohydrate	Fructose, Mannose and Galactose Metabolism	1386	NAMED	VBUYCZFBVCCYFD-NUNKFHFFSA-N	OC[C@H](O)[C@@H](O)[C@H](O)C(C(O)=O)=O	2-ketogulonate	2-ketogulonate	342385-52-8	92502	HMDB0011732	C15673	102424	Polar
100000096	400	15681	155572	Amino Acid	Guanidino and Acetamido Metabolism	571	NAMED	TUHVEAJXIMEOSA-UHFFFAOYSA-N	N=C(N)NCCCC(O)=O	4-guanidinobutanoate	4-guanidinobutanoate	463-003,463-00-3	486	HMDB0003464	C01035	500	Pos Early
100000101	305	15704	147156	Lipid	Fatty Acid, Dicarboxylate	1691	NAMED	WLJVNTCWHIRURA-UHFFFAOYSA-N	OC(CCCCCC(O)=O)=O	pimelate (C7-DC)	pimelate (C7-DC)	111-16-0	376	HMDB0000857	C02656	385	Polar
100000112	305	33951	147990	Amino Acid	Creatine Metabolism	538	NAMED	DRBBFCLWYRJSJZ-UHFFFAOYSA-N	N=C(N(C)CC(O)=O)NP(O)(O)=O	creatine phosphate	creatine phosphate	922-32-7,67-07-2	567	HMDB0001511	C02305	9548602,587	Polar
100000125	400	15949	155608	Nucleotide	Pyrimidine Metabolism, Cytidine containing	4283	NAMED	CKTSBUTUHBMZGZ-SHYZEUOFSA-N	[H][C@]1([H])[C@@](O)([H])[C@](CO)([H])O[C@]1(N2C(N=C(N)C=C2)=O)[H]	2'-deoxycytidine	2'-deoxycytidine	951-77-9	13117	HMDB0000014	C00881	13711	Pos Early
100000251	209	15797	127541	Cofactors and Vitamins	Riboflavin Metabolism	4355	NAMED	FVTCRASFADXXNN-UHFFFAOYSA-N	CC1=C(C)C=C(N(CC(O)C(C(COP(O)(O)=O)O)O)C(C2=N3)=NC(NC2=O)=O)C3=C1	flavin mononucleotide (FMN)	FMN	130-40-5	690	HMDB0001520	C00061	643976	Neg
100000257	305	15443	146478	Carbohydrate	Aminosugar Metabolism	1424	NAMED	AEMOLEFTQBMNLQ-QIUUJYRFSA-N	O[C@@H]1O[C@H]([C@](O)=O)[C@@H](O)[C@H](O)[C@H]1O	glucuronate	glucuronate	207300-70-7	58552	HMDB0000127	C16245	441478,23677976,94715,65041,444791	Polar
100000258	400	43847	157058	Lipid	Glycerolipid Metabolism	2862	NAMED	AWUCVROLDVIAJX-UHFFFAOYSA-N	O=P(O)(OCC(CO)O)O	glycerol 3-phosphate	glycerol 3-phosphate	29849-82-9	734	HMDB0000126	C0093	754	Pos Early
100000263	400	15716	155583	Amino Acid	Histidine Metabolism	85	NAMED	ACZFBYCNAVEFLC-UHFFFAOYSA-N	OC(C(O)=O)CC1=CN=CN1	imidazole lactate	imidazole lactate	14403-45-3	389128	HMDB0002320	C05568	793	Pos Early
100000265	400	15140	155539	Amino Acid	Tryptophan Metabolism	272	NAMED	YGPSJZOEDVAXAB-QMMMGPOBSA-N	N[C@H](C(O)=O)CC(C1=CC=CC=C1N)=O	kynurenine	kynurenine	2922-83-0	141580	HMDB0000684	C00328	161166	Pos Early
100000269	400	15990	155613	Lipid	Phospholipid Metabolism	2254	NAMED	SUHOQUVVVLNYQR-MRVPVSSYSA-N	O=P(OCC[N+](C)(C)C)([O-])OC[C@H](O)CO	glycerophosphorylcholine (GPC)	glycerophosphorylcholine (GPC)	28319-77-9	571409	HMDB0000086	C00670	71920	Pos Early
100000272	305	15142	145758	Amino Acid	Glycine, Serine and Threonine Metabolism	19	NAMED	AYFVYJQAPQTCCC-HRFVKAFMSA-N	O=C(O)[C@@H](N)[C@H](C)O	allo-threonine	allo-threonine	28954-12-3	89699	HMDB0004041	C05519	99289	Polar
100000282	305	15720	164302	Amino Acid	Glutamate Metabolism	49	NAMED	RFMMMVDNIPUKGG-YFKPBYRVSA-N	O=C(O)CC[C@@H](C(O)=O)NC(C)=O	N-acetylglutamate	N-acetylglutamate	5817-08-3	1266066	HMDB0001138	C00624	70914	Polar
100000285	400	32984	155994	Amino Acid	Urea cycle; Arginine and Proline Metabolism	516	NAMED	JRLGPAXAGHMNOL-LURJTMIESA-N	NCCC[C@@H](C(O)=O)NC(C)=O	N-alpha-acetylornithine	N-alpha-acetylornithine	6205-08-9	388369	HMDB0003357	C00437	439232	Pos Early
100000299	209	15136	124851	Nucleotide	Purine Metabolism, (Hypo)Xanthine/Inosine containing	4144	NAMED	UBORTCNDUKBEOP-UUOKFMHZSA-N	OC1=C(N=CN2[C@@]3([H])[C@@](O)([H])[C@@](O)([H])[C@](CO)([H])O3)C2=NC(O)=N1	xanthosine	xanthosine	146-80-5	58484	HMDB0000299	C01762	64959	Neg
100000406	305	15772	146492	Carbohydrate	Pentose Metabolism	1279	NAMED	HEBKCHPVOIAQTA-ZXFHETKHSA-N	OC[C@@H](O)[C@@H](O)[C@@H](O)CO	ribitol	ribitol	488-81-3	10254628	HMDB0002917,HMDB0001851,HMDB0000568,HMDB0000508	C00379,C01904,C00474,C00532	6912	Polar
100000409	305	15667	152132	Xenobiotics	Food Component/Plant	4803	NAMED	BITYXLXUCSKTJS-UHFFFAOYSA-N	OC(CC(O)=O)(C(C)C)C(O)=O	2-isopropylmalate	2-isopropylmalate	3237-44-3	76	HMDB0000402	C02504	77	Polar
100000442	305	18335	146498	Xenobiotics	Food Component/Plant	4928	NAMED	AAWZDTNXLSGCEK-WYWMIBKRSA-N	O[C@@]1([C@](O)(C[C@@](C(O)=O)(C[C@]1(O)[H])O)[H])[H]	quinate	quinate	77-95-2	10246715	HMDB0003072	C00296	6508	Polar
100000446	305	18493	147528	Energy	TCA Cycle	1479	NAMED	HNEGQIOMVPPMNR-NSCUHMNNSA-N	C/C(C(O)=O)=C\C(O)=O	mesaconate (methylfumarate)	mesaconate (methylfumarate)	498-24-8	10289044	HMDB0000749	C01732	638129	Polar
100000454	400	18319	155648	Amino Acid	Lysine Metabolism	138	NAMED	JJMDCOVWQOJGCB-UHFFFAOYSA-N	OC(CCCCN)=O	5-aminovalerate	5-aminovalerate	660-88-8	135	HMDB0003355	C00431	138	Pos Early
100000455	305	18373	147757	Energy	TCA Cycle	1473	NAMED	LVHBHZANLOWSRM-UHFFFAOYSA-N	C=C(C(O)=O)CC(O)=O	itaconate	itaconate	97-65-4	789	HMDB0002092	C00490	811	Polar
100000463	209	18349	124659	Amino Acid	Tryptophan Metabolism	303	NAMED	XGILAAMKEQUXLS-UHFFFAOYSA-N	OC(C(O)=O)CC1=CNC2=C1C=CC=C2	indolelactate	indolelactate	832-97-3	83867	HMDB0000671	C02043	92904	Neg
100000467	209	27672	123315	Amino Acid	Tryptophan Metabolism	327	NAMED	BXFFHSIDQOFMLE-UHFFFAOYSA-N	O=S(OC2=CNC1=CC=CC=C12)(O)=O	3-indoxyl sulfate	3-indoxyl sulfate	2642-37-7	9840	HMDB0000682		10258	Neg
100000487	400	18357	155655	Peptide	Dipeptide	845	NAMED	STKYPAFSDFAEPH-LURJTMIESA-N	CC(C)[C@@H](C(O)=O)NC(CN)=O	glycylvaline	glycylvaline	1963-21-9	2006926	HMDB0028854		2724807	Pos Early
100000491	400	33422	156014	Peptide	Gamma-glutamyl Amino Acid	659	NAMED	XHHOHZPNYFQJKL-QWRGUYRKSA-N	O=C(O)[C@H](CC1=CC=CC=C1)NC(CC[C@@H](C(O)=O)N)=O	gamma-glutamylphenylalanine	gamma-glutamylphenylalanine	7432-24-8	99868	HMDB0000594		111299	Pos Early
100000551	209	22116	124905	Amino Acid	Leucine, Isoleucine and Valine Metabolism	348	NAMED	BKAJNAXTPSGJCU-UHFFFAOYSA-N	CC(C)CC(C(O)=O)=O	4-methyl-2-oxopentanoate	4-methyl-2-oxopentanoate	816-66-0	69	HMDB0000695	C00233	70	Neg
100000580	209	20675	123293	Carbohydrate	Glycolysis, Gluconeogenesis, and Pyruvate Metabolism	1237	NAMED	MPCAJMNYNOGXPB-SLPGGIOYSA-N	O[C@@H]1[C@@H](CO)OC[C@H](O)[C@H]1O	1,5-anhydroglucitol (1,5-AG)	1,5-anhydroglucitol (1,5-AG)	154-58-5		HMDB0002712	C07326	64960	Neg
100000584	209	19266	125764	Lipid	Monoacylglycerol	2893	NAMED	RCRCTBLIHCHWDZ-DOFZRALJSA-N	CCCCC\C=C/C\C=C/C\C=C/C/C=C\CCCC(OC(CO)CO)=O	2-arachidonoylglycerol (20:4)	2-arachidonoylglycerol (20:4)	53847-30-6	4445451	HMDB0004666	C13856	5282280	Neg
100000611	402	20458	164193	Lipid	Lysoplasmalogen	2849	NAMED	VLBPIWYTPAXCFJ-XMMPIXPASA-N	CCCCCCCCCCCCCCCCOC[C@]([H])(COP([O-])(OCC[N+](C)(C)C)=O)O	1-palmityl-GPC (O-16:0)	1-palmityl-GPC (O-16:0)	52691-62-0	3845			3983	Pos Late
100000616	402	52449	208070	Lipid	Phosphatidylinositol (PI)	2574	NAMED	KRTOMQDUKGRFDJ-YKOKTLGVSA-N	CCCCCCCCCCCCCCCCCC(OC[C@]([H])(COP(O)(O[C@](C(O)(C(O)(C(O)([C@](O)1[H])[H])[H])[H])([C@]1(O)[H])[H])=O)OC(CCC/C=C\C/C=C\C/C=C\C/C=C\CCCCC)=O)=O	1-stearoyl-2-arachidonoyl-GPI (18:0/20:4)	1-stearoyl-2-arachidonoyl-GPI (18:0/20:4)	383907-33-3	21403055	HMDB0009815			Pos Late
100000626	305	34445	152172	Lipid	Sphingosines	3182	NAMED	DUYSYHSSBDVJSM-KRWOKUGFSA-N	OP([O-])(OC[C@@]([H])([C@](O)(/C=C/CCCCCCCCCCCCC)[H])[NH3+])=O	sphingosine 1-phosphate	sphingosine 1-phosphate	26993-30-6	4446673	HMDB0000277	C06124	5283560	Polar
100000656	209	19324	128173	Lipid	Lysophospholipid	2739	NAMED	MXAFDFDAIFZFET-CLBYPKMISA-N	[H]C(C(O)(C(O)([C@](O)1[H])[H])[H])([C@@](OP(O)(OC[C@@]([H])(COC(CCCCCCCCCCCCCCCCC)=O)O)=O)([C@]1(O)[H])[H])O	1-stearoyl-GPI (18:0)	1-stearoyl-GPI (18:0)	796963-93-4	21403067	HMDB0240261		71581135,42607495	Neg
100000657	402	19130	164201	Lipid	Phosphatidylcholine (PC)	2296	NAMED	KILNVBDSWZSGLL-KXQOOQHDSA-N	CCCCCCCCCCCCCCCC(OC[C@]([H])(COP([O-])(OCC[N+](C)(C)C)=O)OC(CCCCCCCCCCCCCCC)=O)=O	1,2-dipalmitoyl-GPC (16:0/16:0)	1,2-dipalmitoyl-GPC (16:0/16:0)	63-89-8	398235	HMDB0000564	D03585	452110	Pos Late
100000660	402	19132	164204	Lipid	Phosphatidylcholine (PC)	2339	NAMED	NRJAVPSFFCBXDT-HUESYALOSA-N	CCCCCCCCCCCCCCCCCC(OC[C@]([H])(COP([O-])(OCC[N+](C)(C)C)=O)OC(CCCCCCCCCCCCCCCCC)=O)=O	1,2-distearoyl-GPC (18:0/18:0)	1,2-distearoyl-GPC (18:0/18:0)	816-94-4	85004	HMDB0008036		94190	Pos Late
100000665	209	44675	126139	Lipid	Long Chain Polyunsaturated Fatty Acid (n3 and n6)	1581	NAMED	MBMBGCFOFBJSGT-KUBAVDMBSA-N	CC\C=C/C\C=C/C\C=C/C/C=C\C/C=C\C/C=C\CCC(O)=O	docosahexaenoate (DHA; 22:6n3)	docosahexaenoate (DHA; 22:6n3)	6217-54-5	393183	HMDB0002183	C06429	445580	Neg
100000672	402	19258	164196	Lipid	Phosphatidylcholine (PC)	2280	NAMED	RFVFQQWKPSOBED-PSXMRANNSA-N	CCCCCCCCCCCCCCCC(O[C@](COC(CCCCCCCCCCCCC)=O)(COP([O-])(OCC[N+](C)(C)C)=O)[H])=O	1-myristoyl-2-palmitoyl-GPC (14:0/16:0)	1-myristoyl-2-palmitoyl-GPC (14:0/16:0)	69525-80-0	114798	HMDB0007869		129657	Pos Late
100000706	209	22132	124683	Amino Acid	Leucine, Isoleucine and Valine Metabolism	352	NAMED	LVRFTAZAXQPQHI-UHFFFAOYSA-N	OC(C(CC(C)C)O)=O	alpha-hydroxyisocaproate	alpha-hydroxyisocaproate	10303-64-7	75520	HMDB0000665,HMDB00746,HMDB0000624	C03264	83697,92779,439960	Neg
100000707	305	20676	147767	Lipid	Fatty Acid, Dicarboxylate	1689	NAMED	VZCYOOQTPOCHFL-UHFFFAOYSA-N	O=C(C=CC(O)=O)O	maleate	maleate	110-16-7	392248	HMDB0000176	C01384	444266	Polar
100000708	209	44656	126996	Amino Acid	Leucine, Isoleucine and Valine Metabolism	356	NAMED	GWYFCOCPABKNJV-UHFFFAOYSA-N	CC(C)CC(O)=O	isovalerate (i5:0)	isovalerate (C5)	503-74-2	10001	HMDB0000718	C08262	10430	Neg
100000711	209	44620	126992	Xenobiotics	Benzoate Metabolism	4540	NAMED	HOFGLAYWQRGTKC-UHFFFAOYSA-N	O=S(OC1=CC=C(C(C)=O)C=C1)(O)=O	4-acetylphenol sulfate	4-acetylphenyl sulfate		3872009			4684006	Neg
100000743	209	22036	126061	Lipid	Fatty Acid, Monohydroxy	1978	NAMED	JKRDADVRIYVCCY-UHFFFAOYSA-N	O=C(C(CCCCCC)O)O	2-hydroxyoctanoate	2-hydroxyoctanoate	617-73-2	84994	HMDB0002264		94180,6995013,5312860	Neg
100000763	400	22119	155786	Nucleotide	Pyrimidine Metabolism, Cytidine containing	4276	NAMED	ZAYHVCMSTBRABG-JXOAFFINSA-N	O[C@H]1[C@@H](O)[C@H](N2C(N=C(N)C(C)=C2)=O)O[C@@H]1CO	5-methylcytidine	5-methylcytidine	2140-61-6	83877	HMDB0000982		92918	Pos Early
100000772	400	48118	157706	Lipid	Mevalonate Metabolism	3199	NAMED	JYVXNLLUYHCIIH-UHFFFAOYSA-N	OC(CCO1)(C)CC1=O	mevalonolactone	mevalonolactone	674-26-0	9999	HMDB0006024		10428	Pos Early
100000773	209	22001	126860	Lipid	Fatty Acid, Monohydroxy	1998	NAMED	NDPLAKGOSZHTPH-UHFFFAOYSA-N	OC(CC(O)=O)CCCCC	3-hydroxyoctanoate	3-hydroxyoctanoate	88930-08-9	24791	HMDB0001954	C20793	26613	Neg
100000774	209	22130	124681	Amino Acid	Phenylalanine Metabolism	156	NAMED	VOXXWSYKYCBWHO-UHFFFAOYSA-N	OC(C(O)=O)CC1=CC=CC=C1	phenyllactate (PLA)	phenyllactate (PLA)	828-01-3	3715	HMDB0000779,HMDB0000563	C05607	3848	Neg
100000776	402	44681	159624	Lipid	Fatty Acid Metabolism (Acyl Carnitine, Long Chain Saturated)	1882	NAMED	XOMRRQXKHMYMOC-UHFFFAOYSA-N	[O-]C(CC(OC(CCCCCCCCCCCCCCC)=O)C[N+](C)(C)C)=O	palmitoylcarnitine (C16)	palmitoylcarnitine (C16)	6865-14-1	448	HMDB0000222	C02990	461	Pos Late
100000781	400	32328	155906	Lipid	Fatty Acid Metabolism (Acyl Carnitine, Medium Chain)	1862	NAMED	VVPRQWTYSNDTEA-UHFFFAOYSA-N	O=C(CCCCC)OC(CC([O-])=O)C[N+](C)(C)C	hexanoylcarnitine (C6)	hexanoylcarnitine (C6)	6920-35-0	4932273	HMDB0000756		6426853	Pos Early
100000787	305	22185	147184	Amino Acid	Alanine and Aspartate Metabolism	37	NAMED	OTCCIMWXFLJLIA-BYPYZUCNSA-N	OC([C@@H](NC(C)=O)CC(O)=O)=O	N-acetylaspartate (NAA)	N-acetylaspartate (NAA)	997-55-7,997-55-7	58576	HMDB0000812	C01042	65065	Polar
100000800	209	22114	126063	Amino Acid	Tryptophan Metabolism	309	NAMED	PLVPPLCLBIEYEA-AATRIKPKSA-N	O=C(O)/C=C/C1=CNC2=C1C=CC=C2	indoleacrylate	indoleacrylate	1204-06-4	4524636	HMDB0000734		5375048	Neg
100000802	400	32198	155890	Lipid	Fatty Acid Metabolism (Acyl Carnitine, Short Chain)	1858	NAMED	RDHQFKQIGNGIED-MRVPVSSYSA-N	C[N+](C)(C)C[C@H](OC(C)=O)CC([O-])=O	acetylcarnitine (C2)	acetylcarnitine (C2)	5080-50-2	5406074	HMDB0000201	C02571	7045767	Pos Early
100000808	209	22176	143847	Amino Acid	Methionine, Cysteine, SAM and Taurine Metabolism	467	NAMED	NOKPBJYHPHHWAN-REOHCLBHSA-N	N[C@H](C(O)=O)CSS(O)(=O)=O	cysteine s-sulfate	cysteine s-sulfate	1637-71-4	102939	HMDB0000731	C05824	115015	Neg
100000827	209	21127	126053	Lipid	Monoacylglycerol	2871	NAMED	QHZLMUACJMDIAE-UHFFFAOYSA-N	O=C(CCCCCCCCCCCCCCC)OCC(O)CO	1-palmitoylglycerol (16:0)	1-palmitoylglycerol (16:0)	542-44-9	14201	HMDB0011564		14900	Neg
100000840	209	20693	143841	Xenobiotics	Food Component/Plant	5230	NAMED	ROBFUDYVXSDBQM-UHFFFAOYSA-N	O=C(C(O)C(O)=O)O	tartronate (hydroxymalonate)	tartronate (hydroxymalonate)	80-69-3	44	HMDB0035227	C02287	45	Neg
100000841	209	20694	143843	Cofactors and Vitamins	Ascorbate and Aldarate Metabolism	4378	NAMED	MUBZPKHOEPUJKR-UHFFFAOYSA-N	O=C(O)C(O)=O	oxalate (ethanedioate)	oxalate (ethanedioate)	144-62-7	946	HMDB0002329	C00209	971	Neg
100000846	305	20699	146508	Xenobiotics	Food Component/Plant	4918	NAMED	UNXHWFMMPAWVPI-UHFFFAOYSA-N	OCC(O)C(CO)O	erythritol	erythritol	149-32-6	13835932	HMDB0002994	C00503	222285	Polar
100000863	305	21134	147544	Lipid	Fatty Acid, Dicarboxylate	1683	NAMED	WNLRTRBMVRJNCN-UHFFFAOYSA-N	OC(CCCCC(O)=O)=O	adipate (C6-DC)	adipate	124-04-9	191	HMDB0000448	C06104	196	Polar
100000882	209	21158	152464	Lipid	Fatty Acid, Monohydroxy	2004	NAMED	ATRNZOYKSNPPBF-UHFFFAOYSA-N	CCCCCCCCCCCC(O)CC(O)=O	3-hydroxymyristate	3-hydroxymyristate	3422-31-9	15252	HMDB0061656		16064	Neg
100000924	209	21184	126057	Lipid	Monoacylglycerol	2875	NAMED	RZRNAYUHWVFMIP-KTKRTIGZSA-N	O=C(OCC(O)CO)CCCCCCC/C=C\CCCCCCCC	1-oleoylglycerol (18:1)	1-oleoylglycerol (18:1)	111-03-5	4446588	HMDB0011567		5283468	Neg
100000936	305	44526	147248	Amino Acid	Leucine, Isoleucine and Valine Metabolism	428	NAMED	QHKABHOOEWYVLI-UHFFFAOYSA-N	OC(C(C(C)C)=O)=O	3-methyl-2-oxobutyrate	3-methyl-2-oxobutyrate	3715-29-5	48	HMDB0000019	C00141	49	Polar
100000943	209	21232	126858	Lipid	Monoacylglycerol	2891	NAMED	UPWGQKDVAURUGE-KTKRTIGZSA-N	O=C(OC(CO)CO)CCCCCCC/C=C\CCCCCCCC	2-oleoylglycerol (18:1)	2-oleoylglycerol (18:1)	3443-84-3	4478086	HMDB0011537		5319879	Neg
100000961	400	22137	155792	Amino Acid	Urea cycle; Arginine and Proline Metabolism	500	NAMED	QUOGESRFPZDMMT-YFKPBYRVSA-N	N[C@H](C(O)=O)CCCCNC(N)=N	homoarginine	homoarginine	156-86-5	8732	HMDB0000670	C01924	9085	Pos Early
100000963	305	22138	147550	Amino Acid	Urea cycle; Arginine and Proline Metabolism	501	NAMED	XIGSAGMEBXLVJJ-YFKPBYRVSA-N	N[C@H](C(O)=O)CCCCNC(N)=O	homocitrulline	homocitrulline	1190-49-4	58582	HMDB0000679	C02427	65072	Polar
100000983	209	27503	127569	Lipid	Fatty Acid, Monohydroxy	2005	NAMED	CBWALJHXHCJYTE-UHFFFAOYSA-N	OC(CC(O)=O)CCCCCCCCCCCCC	3-hydroxypalmitate	3-hydroxypalmitate	928-17-6	266538	HMDB0010734		15569776	Neg
100000987	209	32506	125864	Lipid	Monoacylglycerol	2892	NAMED	IEPGNWMPIFDNSD-HZJYTTRNSA-N	O=C(OC(CO)CO)CCCCCCC/C=C\C/C=C\CCCCC	2-linoleoylglycerol (18:2)	2-linoleoylglycerol (18:2)	3443-82-1	4517636	HMDB0011538		5365676	Neg
100000997	209	22053	123301	Lipid	Fatty Acid, Monohydroxy	2000	NAMED	FYSSBMZUBSBFJL-UHFFFAOYSA-N	OC(CC(O)=O)CCCCCCC	3-hydroxydecanoate	3-hydroxydecanoate	5561-87-5	24790	HMDB0002203		26612	Neg
100001006	400	27710	155837	Amino Acid	Glycine, Serine and Threonine Metabolism	2	NAMED	OKJIRPAQVSHGFK-UHFFFAOYSA-N	O=C(O)C(NC(C)=O)[H]	N-acetylglycine	N-acetylglycine	543-24-8	10507	HMDB0000532		10972	Pos Early
100001007	305	27731	147186	Carbohydrate	Pentose Metabolism	1280	NAMED	QXKAIJAYHKCRRA-BXXZVTAOSA-N	OC([C@H](O)[C@H](O)[C@H](O)CO)=O	ribonate	ribonate	5336-08-3	4574162	HMDB0000867	C01685	5460677	Polar
100001022	305	27738	146524	Cofactors and Vitamins	Ascorbate and Aldarate Metabolism	4375	NAMED	JPIJQSOTBSSVTP-UHFFFAOYSA-N	O=C(O)C(O)([H])C([H])(O)CO	threonate	threonate	70753-61-6	133224	HMDB0062620,HMDB0000943	C01620	151152,5460407	Polar
100001026	305	27719	152158	Carbohydrate	Fructose, Mannose and Galactose Metabolism	1390	NAMED	RGHNJXZEOKUKBD-MGCNEYSASA-N	O[C@H]([C@H]([C@H]([C@@H](CO)O)O)O)C(O)=O	galactonate	galactonate	299-28-5	114198	HMDB0000565	C00880,C15930	12310779,128869	Polar
100001033	402	27414	164190	Lipid	Sterol	3242	NAMED	KZJWDPNRJALLNS-XGEQACPASA-N	C[C@@]1([C@]([C@@H](CC[C@@H]([C@H](C)C)CC)C)([H])CC2)[C@@]2([H])[C@@](CC=C3[C@@]4(CC[C@H](O)C3)C)([H])[C@@]4([H])CC1	beta-sitosterol	beta-sitosterol	83-46-5	192962	HMDB0000852	C01753	222284	Pos Late
100001034	209	27513	126866	Amino Acid	Tryptophan Metabolism	304	NAMED	SEOVTRFCIGRIMH-UHFFFAOYSA-N	OC(CC1=CNC2=C1C=CC=C2)=O	indoleacetate	indoleacetate	87-51-4,6505-45-9	780	HMDB0000197	C00954	802	Neg
100001040	209	27447	126071	Lipid	Monoacylglycerol	2876	NAMED	WECGLUPZRHILCT-HZJYTTRNSA-N	CCCCC/C=C\C/C=C\CCCCCCCC(OCC(O)CO)=O	1-linoleoylglycerol (18:2)	1-linoleoylglycerol (18:2)	2277-28-3	4446589	HMDB0011568		5283469	Neg
100001048	209	33419	125868	Lipid	Monoacylglycerol	2888	NAMED	BBNYCLAREVXOSG-UHFFFAOYSA-N	OCC(CO)OC(CCCCCCCCCCCCCCC)=O	2-palmitoylglycerol (16:0)	2-palmitoylglycerol (16:0)	23470-00-0	110006	HMDB0011533		123409	Neg
100001051	400	30460	155848	Amino Acid	Histidine Metabolism	73	NAMED	BRMWTNUJHUMWMS-LURJTMIESA-N	N[C@H](C(O)=O)CC1=CN(C)C=N1	1-methylhistidine	1-methylhistidine	332-80-9	83153	HMDB0000001	C01152	92105	Pos Early
100001054	400	32412	155935	Lipid	Fatty Acid Metabolism (also BCAA Metabolism)	1786	NAMED	QWYFHHGCZUCMBN-SECBINFHSA-N	CCCC(O[C@H](CC([O-])=O)C[N+](C)(C)C)=O	butyrylcarnitine (C4)	butyrylcarnitine (C4)	25576-40-3	184820	HMDB0002013	C02862	439829	Pos Early
100001055	400	33441	156017	Amino Acid	Leucine, Isoleucine and Valine Metabolism	431	NAMED	LRCNOZRCYBNMEP-VIFPVBQESA-N	CC(C)C(O[C@@H](CC([O-])=O)C[N+](C)(C)C)=O	isobutyrylcarnitine (C4)	isobutyrylcarnitine (C4)	25518-49-4		HMDB0000736		168379	Pos Early
100001063	209	31904	125786	Lipid	Secondary Bile Acid Metabolism	3558	NAMED	RHCPKKNRWFXMAT-RRWYKFPJSA-N	[H][C@]1([C@]2(C)[C@](CC1)([H])[C@]3([H])C(C[C@]4([H])C[C@H](O)CC[C@]4(C)[C@@]3([H])C[C@@H]2O)=O)[C@H](C)CCC(O)=O	7-ketodeoxycholate	7-ketodeoxycholate	911-40-0	163659	HMDB0000391		188292	Neg
100001066	209	31885	126874	Lipid	Primary Bile Acid Metabolism	3484	NAMED	DKPMWHFRUGMUKF-CWNVCPLQSA-N	CC(C1CCC2C3[C@H]([C@H]([C@@]4(C[C@@H](CC[C@@]4(C3CC[C@]12C)C)O)[H])O)O)CCC(O)=O	beta-muricholate	beta-muricholate	2393-59-1	2340919	HMDB0000415	C17726	5283853	Neg
100001081	400	31675	155868	Amino Acid	Glutamate Metabolism	62	NAMED	HNJBEVLQSNELDL-UHFFFAOYSA-N	O=C1CCCN1	2-pyrrolidinone	2-pyrrolidinone	616-45-5	11530	HMDB0002039		12025	Pos Early
100001083	400	32405	155932	Amino Acid	Tryptophan Metabolism	310	NAMED	GOLXRNDWAUTYKT-UHFFFAOYSA-N	OC(CCC1=CNC2=C1C=CC=C2)=O	indolepropionate	indolepropionate	830-96-6	3613	HMDB0002302		3744	Pos Early
100001092	400	32401	155930	Cofactors and Vitamins	Nicotinate and Nicotinamide Metabolism	4343	NAMED	WWNNZCOKKKDOPX-UHFFFAOYSA-N	C[N+]1=CC(C([O-])=O)=CC=C1	trigonelline (N'-methylnicotinate)	trigonelline (N'-methylnicotinate)	535-83-1	5369	HMDB0000875	C01004	5570	Pos Early
100001102	209	32388	125800	Lipid	Fatty Acid, Dicarboxylate	1704	NAMED	TVIDDXQYHWJXFK-UHFFFAOYSA-N	OC(CCCCCCCCCCC(O)=O)=O	dodecanedioate (C12-DC)	dodecanedioate (C12)	693-23-2	12213	HMDB0000623	C02678	12736	Neg
100001104	209	32390	125802	Amino Acid	Tyrosine Metabolism	168	NAMED	CAHKINHBCWCHCF-JTQLQIEISA-N	OC1=CC=C(C[C@@H](C(O)=O)NC(C)=O)C=C1	N-acetyltyrosine	N-acetyltyrosine	537-55-3	61606	HMDB0000866		68310	Neg
100001112	209	32457	151499	Lipid	Fatty Acid, Monohydroxy	2003	NAMED	MUCMKTPAZLSKTL-UHFFFAOYSA-N	OC(CC(CCCCCCCCC)O)=O	3-hydroxylaurate	3-hydroxylaurate	53941-38-1	85026	HMDB0000387		94216	Neg
100001121	209	31555	124697	Cofactors and Vitamins	Vitamin B6 Metabolism	4473	NAMED	HXACOUQIXZGNBF-UHFFFAOYSA-N	OC1=C(C(O)=O)C(CO)=CN=C1C	pyridoxate	pyridoxate	82-82-6	6467	HMDB0000017	C00847	6723	Neg
100001126	400	43829	157051	Peptide	Gamma-glutamyl Amino Acid	663	NAMED	AQAKHZVPOOGUCK-XPUUQOCRSA-N	O=C(N[C@H]([C@@](O)=O)C(C)C)CC[C@@H]([C@](O)=O)N	gamma-glutamylvaline	gamma-glutamylvaline	2746-34-1		HMDB0011172		7015683	Pos Early
100001143	305	31936	213875	Lipid	Fatty Acid, Monohydroxy	1999	NAMED	ARJZZFJXSNJKGR-UHFFFAOYSA-N	O=C(O)CCCCC(O)CC(O)=O	3-hydroxysuberate	3-hydroxysuberate	73141-47-6	13498677	HMDB0000325		22328017	Polar
100001145	209	31943	125798	Lipid	Fatty Acid, Monohydroxy	2002	NAMED	OQYZCCKCJQWHIE-UHFFFAOYSA-N	OC(CC(O)CCCCCCC(O)=O)=O	3-hydroxysebacate	3-hydroxysebacate	73141-46-5	2285525	HMDB0000350		3017884	Neg
100001148	209	31938	125792	Lipid	Fatty Acid, Monohydroxy	2013	NAMED	YDCRNMJQROAWFT-UHFFFAOYSA-N	CC(O)CCCC(O)=O	5-hydroxyhexanoate	5-hydroxyhexanoate	44843-89-2	149280	HMDB0000409,HMDB0000525		170748	Neg
100001149	400	31940	155885	Amino Acid	Leucine, Isoleucine and Valine Metabolism	366	NAMED	PFWQSHXPNKRLIV-UHFFFAOYSA-N	O=C(O)CNC(/C=C(C)/C)=O	3-methylcrotonylglycine	3-methylcrotonylglycine	33008-07-0	148224	HMDB0000459	C20828	169485	Pos Early
100001150	209	31932	143851	Lipid	Fatty Acid Metabolism (also BCAA Metabolism)	1790	NAMED	WOMAZEJKVZLLFE-UHFFFAOYSA-N	O=C(CC)NCC(O)=O	propionylglycine	propionylglycine (C3)	21709-90-0	89122	HMDB0000783		98681	Neg
100001151	209	31850	125782	Lipid	Fatty Acid Metabolism (also BCAA Metabolism)	1787	NAMED	WPSSBBPLVMTKRN-UHFFFAOYSA-N	O=C(CNC(CCC)=O)O	butyrylglycine	butyrylglycine (C4)	20208-73-5	79766	HMDB0000808		88412	Neg
100001153	305	31934	145806	Lipid	Fatty Acid, Dicarboxylate	1685	NAMED	OTTXIFWBPRRYOG-UHFFFAOYSA-N	O=C(O)C(O)CCCC(O)=O	2-hydroxyadipate	2-hydroxyadipate	18294-85-4	167943	HMDB0000321	C02360	193530	Polar
100001155	209	31928	125790	Amino Acid	Leucine, Isoleucine and Valine Metabolism	404	NAMED	HOACIBQKYRHBOW-UHFFFAOYSA-N	O=C(O)CNC(C(C)CC)=O	2-methylbutyrylglycine	2-methylbutyrylglycine (C5)	52320-67-9	168243	HMDB0000339		193872	Neg
100001162	400	32452	155955	Lipid	Fatty Acid Metabolism (also BCAA Metabolism)	1789	NAMED	UFAHZIUFPNSHSL-UHFFFAOYSA-N	[O-]C(CC(OC(CC)=O)C[N+](C)(C)C)=O	propionylcarnitine (C3)	propionylcarnitine (C3)	17298-37-2	96904	HMDB0000824	C03017	107738	Pos Early
100001167	400	35127	156146	Amino Acid	Urea cycle; Arginine and Proline Metabolism	522	NAMED	ONPXCLZMBSJLSP-ALKRTJFJSA-N	OC([C@H]1N(C([C@H]2NCCC2)=O)CC(O)C1)=O	pro-hydroxy-pro	prolylhydroxyproline	18684-24-7	9847785	HMDB0006695		11902893	Pos Early
100001170	209	32397	125810	Amino Acid	Leucine, Isoleucine and Valine Metabolism	410	NAMED	ZMZQVAUJTDKQGE-UHFFFAOYSA-N	O=C(O)C(CC)CO	3-hydroxy-2-ethylpropionate	3-hydroxy-2-ethylpropionate	4374-62-3	164207	HMDB0000396		188979	Neg
100001181	209	32504	125862	Lipid	Long Chain Polyunsaturated Fatty Acid (n3 and n6)	1580	NAMED	YUFFSWGQGVEMMI-JLNKQSITSA-N	O=C(O)CCCCC/C=C\C/C=C\C/C=C\C/C=C\C/C=C\CC	docosapentaenoate (n3 DPA; 22:5n3)	docosapentaenoate (DPA; 22:5n3)	2234-74-4		HMDB0006528,HMDB0001976	C16513	6441454	Neg
100001182	209	32415	125824	Lipid	Long Chain Polyunsaturated Fatty Acid (n3 and n6)	1595	NAMED	HVGRZDASOHMCSK-AVQMFFATSA-N	CCCCC/C=C/C/C=C/CCCCCCCCCCCC(O)=O	docosadienoate (22:2n6)	docosadienoate (22:2n6)	7370-49-2	4445934	HMDB0061714	C16533	5282807	Neg
100001193	209	32980	125866	Lipid	Long Chain Polyunsaturated Fatty Acid (n3 and n6)	1593	NAMED	TWSWSIQAPQLDBP-CGRWFSSPSA-N	O=C(CCCCC/C=C/C/C=C/C/C=C/C/C=C/CCCCC)O	adrenate (22:4n6)	adrenate (22:4n6)	2091-25-0	4445971	HMDB0002226	C16527	5282844,5497181	Neg
100001197	209	32497	125854	Lipid	Medium Chain Fatty Acid	1518	NAMED	FRPZMMHWLSIFAZ-UHFFFAOYSA-N	O=C(CCCCCCCCC=C)O[H]	10-undecenoate (11:1n1)	10-undecenoate (11:1n1)	1333-28-4	10771160	HMDB0033724	C13910	14891	Neg
100001198	209	32418	125828	Lipid	Long Chain Monounsaturated Fatty Acid	1544	NAMED	YWWVWXASSLXJHU-WAYWQWQTSA-N	O=C(CCCCCCC/C=C\CCCC)O	myristoleate (14:1n5)	myristoleate (14:1n5)	544-64-9	4444564	HMDB0002000	C08322	5281119	Neg
100001204	400	43831	157053	Amino Acid	Histidine Metabolism	92	NAMED	FHQDWPCFSJMNCT-UHFFFAOYSA-N	CN1C=C(CCN)N=C1	1-methylhistamine	1-methylhistamine	501-75-7	3488	HMDB0000898	C05127	3614	Pos Early
100001207	400	32349	155910	Amino Acid	Histidine Metabolism	99	NAMED	PRJKNHOMHKJCEJ-UHFFFAOYSA-N	O=C(O)CC1=CNC=N1	4-imidazoleacetate	4-imidazoleacetate	645-65-8	86856	HMDB0002024	C02835	96215	Pos Early
100001208	400	32350	155911	Amino Acid	Histidine Metabolism	93	NAMED	ZHCKPJGJQOPTLB-UHFFFAOYSA-N	O=C(O)CC1=CN(C)C=N1	1-methyl-4-imidazoleacetate	1-methyl-4-imidazoleacetate	2625-49-2	68319	HMDB0002820	C05828	75810	Pos Early
100001211	209	32398	125812	Lipid	Fatty Acid, Dicarboxylate	1699	NAMED	CXMXRPHRNRROMY-UHFFFAOYSA-N	OC(CCCCCCCCC(O)=O)=O	sebacate (C10-DC)	sebacate (C10-DC)	111-20-6	5004	HMDB0000792	C08277	5192	Neg
100001212	305	32446	152164	Amino Acid	Guanidino and Acetamido Metabolism	572	NAMED	VVHOUVWJCQOYGG-UHFFFAOYSA-N	N=C(N)NC(C(O)=O)CC(O)=O	guanidinosuccinate	guanidinosuccinate	6133-30-8	88329	HMDB0003157	C03139	439918	Polar
100001219	209	32453	125842	Xenobiotics	Food Component/Plant	4894	NAMED	ZQSIJRDFPHDXIC-UHFFFAOYSA-N	OC1=CC2=C(C(C(C3=CC=C(O)C=C3)=CO2)=O)C=C1	daidzein	daidzein	486-66-8	4445025	HMDB0003312	C10208	5281708	Neg
100001221	209	32448	125838	Xenobiotics	Food Component/Plant	4713	NAMED	TZBJGXHYKVUXJN-UHFFFAOYSA-N	O=C1C(C(O)=C2)=C(C=C2O)OC=C1C(C=C3)=CC=C3O	genistein	genistein	446-72-0	4444448	HMDB0003217	C06563	5280961	Neg
100001229	209	33969	126890	Lipid	Long Chain Polyunsaturated Fatty Acid (n3 and n6)	1575	NAMED	JIWBIWFOSCKQMA-LTKCOYKYSA-N	CC\C=C/C\C=C/C\C=C/C\C=C/CCCCC(O)=O	stearidonate (18:4n3)	stearidonate (18:4n3)	111174-40-4	4471933	HMDB0006547	C16300	5312508	Neg
100001232	209	33968	126127	Lipid	Medium Chain Fatty Acid	1522	NAMED	IJBFSOLHRKELLR-FPLPWBNLSA-N	CCCCCC\C=C/CCCC(O)=O	5-dodecenoate (12:1n7)	5-dodecenoate (12:1n7)	2430-94-6	4471803	HMDB0000529		5312378	Neg
100001247	402	33936	158581	Lipid	Fatty Acid Metabolism (Acyl Carnitine, Medium Chain)	1870	NAMED	CXTATJFJDMJMIY-UHFFFAOYSA-N	[O-]C(CC(C[N+](C)(C)C)OC(CCCCCCC)=O)=O	octanoylcarnitine (C8)	octanoylcarnitine (C8)	3671-77-0	110274	HMDB0000791	C02838	123701,11953814	Pos Late
100001251	402	33941	158585	Lipid	Fatty Acid Metabolism (Acyl Carnitine, Medium Chain)	1878	NAMED	LZOSYCMHQXPBFU-UHFFFAOYSA-N	[O-]C(CC(C[N+](C)(C)C)OC(CCCCCCCCC)=O)=O	decanoylcarnitine (C10)	decanoylcarnitine (C10)	1492-27-9	8420677	HMDB0000651		10245190	Pos Late
100001253	400	33943	156041	Amino Acid	Glutamate Metabolism	50	NAMED	KSMRODHGGIIXDV-YFKPBYRVSA-N	OC([C@H](CCC(N)=O)NC(C)=O)=O	N-acetylglutamine	N-acetylglutamine	2490-97-3	158492	HMDB0006029	C02716	182230	Pos Early
100001254	209	33959	126119	Amino Acid	Tryptophan Metabolism	260	NAMED	DZTHIGRZJZPRDV-LBPRGKRZSA-N	O=C(O)[C@@H](NC(C)=O)CC1=CNC2=C1C=CC=C2	N-acetyltryptophan	N-acetyltryptophan	1218-34-4	610602	HMDB0013713	C03137	439917,700653	Neg
100001256	209	33950	126109	Amino Acid	Phenylalanine Metabolism	144	NAMED	CBQJSKKFNMDLON-JTQLQIEISA-N	O=C(O)[C@@H](NC(C)=O)CC1=CC=CC=C1	N-acetylphenylalanine	N-acetylphenylalanine	2018-61-3	67404	HMDB0000512	C03519	74839	Neg
100001257	400	33942	156040	Amino Acid	Alanine and Aspartate Metabolism	42	NAMED	HXFOXFJUNFFYMO-BYPYZUCNSA-N	OC([C@@H](NC(C)=O)CC(N)=O)=O	N-acetylasparagine	N-acetylasparagine	4033-40-3	90090	HMDB0006028		99715	Pos Early
100001258	400	34398	156101	Peptide	Dipeptide	835	NAMED	DKEXFJVMVGETOO-LURJTMIESA-N	OC([C@@H](NC(CN)=O)CC(C)C)=O	glycylleucine	glycylleucine	869-19-2	83812	HMDB0000759	C02155	92843	Pos Early
100001259	209	33944	126880	Amino Acid	Glutathione Metabolism	582	NAMED	QTQDDTSVRVWHMO-UHFFFAOYSA-N	O=C(NCC(O)=O)C(CSC)NC(CCC(N)C(O)=O)=O	S-methylglutathione	S-methylglutathione	2922-56-7	2841309		C11347	115260	Neg
100001263	402	33955	158599	Lipid	Lysophospholipid	2618	NAMED	ASWBNKHCZGQVJV-UHFFFAOYSA-N	O=P(OCC[N+](C)(C)C)([O-])OCC(O)COC(CCCCCCCCCCCCCCC)=O	1-palmitoyl-GPC (16:0)	1-palmitoyl-GPC (16:0)	17364-16-8	78064	HMDB0010382	C04102	86554	Pos Late
100001266	400	33953	156051	Amino Acid	Urea cycle; Arginine and Proline Metabolism	506	NAMED	SNEIUMQYRCDYCH-LURJTMIESA-N	O=C(O)[C@@H](NC(C)=O)CCCNC(N)=N	N-acetylarginine	N-acetylarginine	155-84-0	60752	HMDB0004620	C02562	67427	Pos Early
100001269	402	33997	164179	Lipid	Sterol	3245	NAMED	SGNBVLSWZMBQTH-PODYLUTMSA-N	C[C@H](CC[C@@H](C)C(C)C)[C@@]1([H])CC[C@@]2([H])[C@]3([H])CC=C4C[C@@H](O)CC[C@]4(C)[C@@]3([H])CC[C@@]21C	campesterol	campesterol	474-62-4	151215	HMDB0002869	C01789	173183	Pos Late
100001270	402	33952	158596	Lipid	Fatty Acid Metabolism (Acyl Carnitine, Long Chain Saturated)	1880	NAMED	PSHXNVGSVNEJBD-UHFFFAOYSA-N	O=C(CCCCCCCCCCCCC)OC(CC([O-])=O)C[N+](C)(C)C	myristoylcarnitine (C14)	myristoylcarnitine (C14)	18822-89-4	4932274	HMDB0005066		6426854	Pos Late
100001271	402	33961	158603	Lipid	Lysophospholipid	2629	NAMED	IHNKQIMGVNPMTC-RUZDIDTESA-N	O[C@H](COC(CCCCCCCCCCCCCCCCC)=O)COP(OCC[N+](C)(C)C)([O-])=O	1-stearoyl-GPC (18:0)	1-stearoyl-GPC (18:0)	19420-57-6	435389	HMDB0010384		497300	Pos Late
100001272	402	48258	160285	Lipid	Lysophospholipid	2631	NAMED	YAMUFBLWGFFICM-PTGWMXDISA-N	O[C@H](COC(CCCCCCC/C=C\CCCCCCCC)=O)COP(OCC[N+](C)(C)C)([O-])=O	1-oleoyl-GPC (18:1)	1-oleoyl-GPC (18:1)	19420-56-5	17240641	HMDB0002815	C03916	16081932	Pos Late
100001274	209	33939	126095	Amino Acid	Glycine, Serine and Threonine Metabolism	18	NAMED	PEDXUVCGOLSNLQ-UHFFFAOYSA-N	CC(O)C(C(O)=O)NC(C)=O	N-acetylthreonine	N-acetylthreonine	17093-74-2	3841173	HMDB0062557		152204	Neg
100001275	400	33945	156043	Peptide	Acetylated Peptides	1207	NAMED	UTYVDVLMYQPLQB-UHFFFAOYSA-N	OC(CNC(CC1=CC=CC=C1)=O)=O	phenylacetylglycine	phenylacetylglycine	500-98-1	61452	HMDB0000821	C05598	68144	Pos Early
100001276	209	33967	126125	Amino Acid	Leucine, Isoleucine and Valine Metabolism	392	NAMED	JDTWZSUNGHMMJM-MSZQBOFLSA-N	CC(N[C@H](C(O)=O)C(C)CC)=O	N-acetylisoleucine	N-acetylisoleucine	3077-46-1	2081100	HMDB0061684		306109	Neg
100001277	209	33972	126131	Lipid	Long Chain Monounsaturated Fatty Acid	1558	NAMED	BBOWBNGUEWHNQZ-KTKRTIGZSA-N	O=C(O)CCCCCCCC/C=C\CCCCCCCC	10-nonadecenoate (19:1n9)	10-nonadecenoate (19:1n9)	73033-09-7	4471938	HMDB0013622		5312513	Neg
100001278	209	33971	126129	Lipid	Long Chain Monounsaturated Fatty Acid	1549	NAMED	GDTXICBNEOEPAZ-FPLPWBNLSA-N	O=C(O)CCCCCCCC/C=C\CCCCCC	10-heptadecenoate (17:1n7)	10-heptadecenoate (17:1n7)	29743-97-3	4471860	HMDB0060038		5312435	Neg
100001293	400	33946	156044	Amino Acid	Histidine Metabolism	75	NAMED	KBOJOGQFRVVWBH-ZETCQYMHSA-N	OC([C@@H](NC(C)=O)CC1=CNC=N1)=O	N-acetylhistidine	N-acetylhistidine	39145-52-3	68142	HMDB0032055	C02997	75619	Pos Early
100001294	400	33949	156047	Peptide	Gamma-glutamyl Amino Acid	652	NAMED	ACIJGUBIMXQCMF-BYPYZUCNSA-N	O=C(O)[C@@H](N)CCC(NCC(O)=O)=O	gamma-glutamylglycine	gamma-glutamylglycine	1948-29-4	145071	HMDB0011667		100099	Pos Early
100001295	400	33947	156045	Peptide	Gamma-glutamyl Amino Acid	661	NAMED	CATMPQFFVNKDEY-AAEUAGOBSA-N	O=C(O)[C@@H](N)CCC(N[C@@H](CC1=CNC2=C1C=CC=C2)C(O)=O)=O	gamma-glutamyltryptophan	gamma-glutamyltryptophan	66471-20-3	2302065	HMDB0029160		3989307	Pos Early
100001296	400	34384	156088	Xenobiotics	Food Component/Plant	5087	NAMED	CMUNUTVVOOHQPW-LURJTMIESA-N	C[N+]1(C)[C@H]([C@@]([O-])=O)CCC1	stachydrine	stachydrine	4136-37-2	103115	HMDB0004827	C10172	115244	Pos Early
100001300	305	46537	146562	Amino Acid	Leucine, Isoleucine and Valine Metabolism	429	NAMED	NGEWQZIDQIYUNV-UHFFFAOYSA-N	OC(C(O)=O)C(C)C	alpha-hydroxyisovalerate	alpha-hydroxyisovalerate	600-37-3	90190	HMDB0000407		99823	Polar
100001310	400	33013	155997	Cofactors and Vitamins	Nicotinate and Nicotinamide Metabolism	4328	NAMED	BUCXGWMZJBKEMD-UHFFFAOYSA-N	NC(C1=C[N+](C2C(C(C(C[O-])O2)O)O)=CC=C1)=O	nicotinamide riboside	nicotinamide riboside	1341-23-7		HMDB0000855	C03150	439924	Pos Early
100001311	400	34592	156127	Amino Acid	Glutathione Metabolism	592	NAMED	JCMUOFQHZLPHQP-UHFFFAOYSA-N	O=C(NC(CC)C(NCC(O)=O)=O)CCC(C(O)=O)N	ophthalmate	ophthalmate	495-27-2	7993181	HMDB0005765		7018721	Pos Early
100001313	400	44872	157084	Peptide	Gamma-glutamyl Amino Acid	658	NAMED	RQNSKRXMANOPQY-BQBZGAKWSA-N	O=C(O)[C@H](CCSC)NC(CC[C@@H](C(O)=O)N)=O	gamma-glutamylmethionine	gamma-glutamylmethionine	17663-87-5	5373147	HMDB0029155		7009567	Pos Early
100001314	400	33364	156009	Peptide	Gamma-glutamyl Amino Acid	660	NAMED	GWNXFCYUJXASDX-JUZNGCLZSA-N	CC(O)[C@@H](C(O)=O)NC(CC[C@@H](C(O)=O)N)=O	gamma-glutamylthreonine	gamma-glutamylthreonine	5652-48-2	21403107	HMDB0029159		76078708	Pos Early
100001315	209	36103	143727	Xenobiotics	Benzoate Metabolism	4575	NAMED	WGNAKZGUSRVWRH-UHFFFAOYSA-N	O=S(OC1=CC=C(C)C=C1)(O)=O	p-cresol sulfate	p-cresol sulfate	3233-57-7	3806480	HMDB0011635		4615423	Neg
100001316	400	33471	156023	Cofactors and Vitamins	Nicotinate and Nicotinamide Metabolism	4323	NAMED	PUEDDPCUCPRQNY-ZYUZMQFOSA-N	O[C@H]([C@@H]1O)[C@@H](O[C@@H]1CO)[N@+]2=CC(C([O-])=O)=CC=C2	nicotinate ribonucleoside	nicotinate ribonucleoside	2625-49-2	141635	HMDB0006809	C05841	161233	Pos Early
100001320	305	42420	148204	Carbohydrate	Aminosugar Metabolism	1449	NAMED	JPIJQSOTBSSVTP-PWNYCUMCSA-N	OC[C@@H](O)[C@@H](O)C(O)=O	erythronate*	erythronate*	88759-55-1	2061231	HMDB0000613		2781043	Polar
100001334	400	34387	156090	Amino Acid	Urea cycle; Arginine and Proline Metabolism	512	NAMED	GNMSLDIYJOSUSW-UHFFFAOYSA-N	O=C(O)C(CCC1)N1C(C)=O	N-acetylproline	N-acetylproline	1074-79-9	285677	HMDB0094701		322640	Pos Early
100001335	209	33587	143715	Lipid	Long Chain Monounsaturated Fatty Acid	1561	NAMED	BITHHVVYSMSWAG-KTKRTIGZSA-N	O=C(O)CCCCCCCCC/C=C\CCCCCCCC	eicosenoate (20:1)	eicosenoate (20:1n9 or 1n11)		4445895	HMDB0002231,HMDB0062436	C16526	5282768,5282769,94159	Neg
100001337	209	34035	143703	Lipid	Long Chain Polyunsaturated Fatty Acid (n3 and n6)	1587	NAMED	DTOSIQBPPRVQHS-PDBXOOCHSA-N	O=C(O)CCCCCCC/C=C\C/C=C\C/C=C\CC	linolenate [alpha or gamma; (18:3n3 or 6)]	linolenate (18:3n3 or 3n6)		4444437	HMDB0003073,HMDB0001388	C06426,C06427	5280933,5280934	Neg
100001359	209	46173	144239	Energy	TCA Cycle	1459	NAMED			aconitate [cis or trans]	aconitate [cis or trans]			HMDB0000958,HMDB000072	C004174,C02341	444212,643757	Neg
100001383	402	45453	159645	Lipid	Lysophospholipid	2613	NAMED	VXUOFDJKYGDUJI-OAQYLSRUSA-N	CCCCCCCCCCCCCC(OC[C@](O)([H])COP(OCC[N+](C)(C)C)([O-])=O)=O	1-myristoyl-GPC (14:0)	1-myristoyl-GPC (14:0)	20559-16-4	405289	HMDB0010379	C04230	460604	Pos Late
100001384	402	45456	159647	Lipid	Lysophospholipid	2642	NAMED	UATOAILWGVYRQS-HHHXNRCGSA-N	CCCCCCCCCCCCCCCCCCCC(OC[C@](O)([H])COP(OCC[N+](C)(C)C)([O-])=O)=O	1-arachidoyl-GPC (20:0)	1-arachidoyl-GPC (20:0)	108341-80-6	21403128	HMDB0010390	C04230	24779473	Pos Late
100001386	402	41754	159409	Cofactors and Vitamins	Hemoglobin and Porphyrin Metabolism	4429	NAMED	GGIDWJQWCUJYRY-UHFFFAOYSA-K	CC1=C(CCC(O)=O)C(/C=C(C(CCC([O-])=O)=C/2C)\[N-]C2=C/C3=N/C(C(C=C)=C3C)=C\4)=N/C1=C\C(N([Fe+2])C4=C5C)=C5C=C	heme	heme	14875-96-8		HMDB0003178	C00032	26945	Pos Late
100001391	402	34409	158657	Lipid	Fatty Acid Metabolism (Acyl Carnitine, Long Chain Saturated)	1884	NAMED	FNPHNLNTJNMAEE-HSZRJFAPSA-N	[O-]C(C[C@@H](OC(CCCCCCCCCCCCCCCCC)=O)C[N+](C)(C)C)=O	stearoylcarnitine (C18)	stearoylcarnitine (C18)	18822-91-8	21233653	HMDB0000848		3006797	Pos Late
100001392	402	34534	158670	Lipid	Fatty Acid Metabolism (Acyl Carnitine, Medium Chain)	1879	NAMED	FUJLYHJROOYKRA-UHFFFAOYSA-N	[O-]C(CC(C[N+](C)(C)C)OC(CCCCCCCCCCC)=O)=O	laurylcarnitine (C12)	laurylcarnitine (C12)	25518-54-1	8602997	HMDB000225		168381	Pos Late
100001393	400	34407	156109	Amino Acid	Leucine, Isoleucine and Valine Metabolism	359	NAMED	IGQBPDJNUXPEMT-UHFFFAOYSA-N	[O-]C(CC(C[N+](C)(C)C)OC(CC(C)C)=O)=O	isovalerylcarnitine (C5)	isovalerylcarnitine (C5)	31023-24-2	4932271	HMDB0000688	C20826	169235	Pos Early
100001394	400	34406	156108	Lipid	Fatty Acid Metabolism (Acyl Carnitine, Short Chain)	1859	NAMED	VSNFQQXVMPSASB-UHFFFAOYSA-N	[O-]C(CC(C[N+](C)(C)C)OC(CCCC)=O)=O	valerylcarnitine (C5)	valerylcarnitine (C5)	40225-14-7	4932322	HMDB0013128		6426903	Pos Early
100001395	402	34419	158662	Lipid	Lysophospholipid	2634	NAMED	SPJFYYJXNPEZDW-UTJQPWESSA-N	O=P(OCC(O)COC(CCCCCCC/C=C\C/C=C\CCCCC)=O)([O-])OCC[N+](C)(C)C	1-linoleoyl-GPC (18:2)	1-linoleoyl-GPC (18:2)		10160888	HMDB0010386	C04100	11988421	Pos Late
100001409	400	48351	179271	Nucleotide	Purine Metabolism, (Hypo)Xanthine/Inosine containing	4147	NAMED	WJNGQIYEQLPJMN-UHFFFAOYSA-N	OC(C1O)C(OC1CO)N(C=N2)C(N=CN3C)=C2C3=O	N1-methylinosine	N1-methylinosine	20245-33-4	513976	HMDB0002721		650095	Pos Early
100001412	400	35137	156155	Nucleotide	Purine Metabolism, Guanine containing	4213	NAMED	RSPURTUNRHNVGF-IOSLPCCCSA-N	O=C1C(N=CN2[C@@]3([H])[C@@](O)([H])[C@@](O)([H])[C@](CO)([H])O3)=C2N=C(N(C)C)N1	N2,N2-dimethylguanosine	N2,N2-dimethylguanosine	2140-67-2	83878	HMDB0004824		135501639	Pos Early
100001413	400	35130	156149	Nucleotide	Pyrimidine Metabolism, Cytidine containing	4277	NAMED	NIDVTARKFBZMOT-PEBGCTIMSA-N	O[C@]1([H])[C@@](O)([H])[C@](CO)([H])O[C@]1(N2C(N=C(NC(C)=O)C=C2)=O)[H]	N4-acetylcytidine	N4-acetylcytidine	3768-18-1	96702	HMDB0005923		107461	Pos Early
100001415	209	35157	126974	Nucleotide	Purine Metabolism, Adenine containing	4185	NAMED	UNUYMBPXEFMLNW-HZPYULPISA-N	OC(C)C(C(O)=O)NC(NC1=NC=NC2=C1N=CN2[C@@H]3O[C@H](CO)[C@@H](O)[C@H]3O)=O	N6-carbamoylthreonyladenosine	N6-carbamoylthreonyladenosine	24719-82-2	141829	HMDB0041623		161466	Neg
100001416	305	35172	147813	Nucleotide	Pyrimidine Metabolism, Orotate containing	4230	NAMED	FKCRAVPPBFWEJD-XVFCMESISA-N	O=C(C=C(C(O)=O)N1[C@H]2[C@H](O)[C@H](O)[C@@H](CO)O2)NC1=O	orotidine	orotidine	314-50-1	83729	HMDB0000788		92751	Polar
100001418	400	35117	156141	Amino Acid	Methionine, Cysteine, SAM and Taurine Metabolism	485	NAMED	JKLRIMRKZBSSED-UHFFFAOYSA-N	N=C(NCCS(O)(=O)=O)N	taurocyamine	taurocyamine	543-18-0	61635	HMDB0003584	C01959	68340	Pos Early
100001423	209	35527	127577	Xenobiotics	Benzoate Metabolism	4492	NAMED	ZMHLUFWWWPBTIU-UHFFFAOYSA-N	O=C(NCC(O)=O)C1=CC=C(O)C=C1	4-hydroxyhippurate	4-hydroxyhippurate	2482-25-9	133104	HMDB0013678		151012	Neg
100001425	209	61833	218435	Nucleotide	Pyrimidine Metabolism, Uracil containing	4243	NAMED	ZPTBLXKRQACLCR-XVFCMESISA-N	OC[C@H]1O[C@@H](N2CCC(NC2=O)=O)[C@@H]([C@@H]1O)O	5,6-dihydrouridine	5,6-dihydrouridine	5627-05-4	85115	HMDB0000497		94312	Neg
100001431	209	47898	151551	Lipid	Monoacylglycerol	2870	NAMED	QSKPZDMBULYMDQ-UHFFFAOYSA-N	O=C(CCCCCCCCCCCCCC)OCC(O)CO	1-pentadecanoylglycerol (15:0)	1-pentadecanoylglycerol (15:0)	104140-07-0	165667			190750	Neg
100001433	209	34397	126918	Lipid	Monoacylglycerol	2882	NAMED	DCPCOKIYJYGMDN-DOFZRALJSA-N	O=C(CCC/C=C\C/C=C\C/C=C\C/C=C\CCCCC)OCC(O)CO	1-arachidonylglycerol (20:4)	1-arachidonylglycerol (20:4)	35474-99-8	4445452	HMDB11578	C13857	16019980,5282281	Neg
100001435	209	34393	126910	Lipid	Monoacylglycerol	2877	NAMED	XQBHBEXBUZDCRY-QNEBEIHSSA-N	O=C(OCC(O)CO)CCCC\C=C/C\C=C/C\C=C/CCCCC	1-linolenoylglycerol (18:3)	1-linolenoylglycerol (18:3)	124151-74-2	21403134	HMDB0011569		53480978	Neg
100001437	400	35159	161190	Amino Acid	Glutathione Metabolism	581	NAMED	BNRXZEPOHPEEAS-UHFFFAOYSA-N	NC(C(O)=O)CCC(NC(CSSCC(N)C(O)=O)C(NCC(O)=O)=O)=O	cysteine-glutathione disulfide	cysteine-glutathione disulfide	13081-14-6	3455404	HMDB0000656	R00900	3080690	Pos Early
100001446	209	35136	128207	Nucleotide	Pyrimidine Metabolism, Uracil containing	4245	NAMED	DWRXFEITVBNRMK-JXOAFFINSA-N	O[C@@H]1[C@H](O)[C@@H](CO)O[C@H]1N(C=C2C)C(NC2=O)=O	5-methyluridine (ribothymidine)	5-methyluridine (ribothymidine)	1463-10-1	393058	HMDB0000884		445408	Neg
100001451	209	36768	128295	Lipid	Fatty Acid Metabolism (Acyl Glycine)	1821	NAMED	NYZBWOSRZJKQAI-UHFFFAOYSA-N	OC(CNC(CCCC)=O)=O	valerylglycine	valerylglycine (C5)	24003-66-5	3924818	HMDB0000927		4737557	Neg
100001452	209	35107	126956	Amino Acid	Leucine, Isoleucine and Valine Metabolism	358	NAMED	ZRQXMKMBBMNNQC-UHFFFAOYSA-N	O=C(O)CNC(CC(C)C)=O	isovalerylglycine	isovalerylglycine	16284-60-9	475516	HMDB00678		546304	Neg
100001454	209	62915	220767	Lipid	Fatty Acid, Dicarboxylate	1705	NAMED	FYVQCLGZFXHEGL-UHFFFAOYSA-N	O=C(O)CC(O)CCCCCCCCC(O)=O	3-hydroxydodecanedioate*	3-hydroxydodecanedioate*	34574-69-1	13628081	HMDB0000413		16663321	Neg
100001456	400	35114	156140	Nucleotide	Purine Metabolism, Guanine containing	4207	NAMED	FZWGECJQACGGTI-UHFFFAOYSA-N	O=C1C(N2C)=C(N=C2)N=C(N)N1	7-methylguanine	7-methylguanine	578-76-7	10883	HMDB0000897	C02242	135398679	Pos Early
100001461	402	42398	159466	Lipid	Lysophospholipid	2687	NAMED	BBYWOYAFBUOUFP-JOCHJYFZSA-N	O=P(OCC[NH3+])([O-])OC[C@H](O)COC(CCCCCCCCCCCCCCCCC)=O	1-stearoyl-GPE (18:0)	1-stearoyl-GPE (18:0)	69747-55-3	7826018	HMDB0011130		9547068	Pos Late
100001462	209	34437	126952	Lipid	Lysophospholipid	2729	NAMED	HFJVKBVEKQHVTO-OZAIVSQSSA-N	O=P(OCC(O)CO)(O)OC[C@H](O)COC(CCCCCCCCCCCCCCCCC)=O	1-stearoyl-GPG (18:0)	1-stearoyl-GPG (18:0)		21403138				Neg
100001468	209	40469	143005	Cofactors and Vitamins	Nicotinate and Nicotinamide Metabolism	4345	NAMED	JLQSXXWTCJPCBC-UHFFFAOYSA-N	O=C(C1=C([H])N(C(C([H])=C1[H])=O)C([H])([H])[H])N([H])[H]	N1-methyl-2-pyridone-5-carboxamide	N1-methyl-2-pyridone-5-carboxamide	701-44-0	62899	HMDB0004193	C05842	69698	Neg
100001469	400	57584	211562	Cofactors and Vitamins	Nicotinate and Nicotinamide Metabolism	4346	NAMED	KTLRWTOPTKGYQY-UHFFFAOYSA-N	O=C(C(C1=O)=CN(C=C1)C)N	N1-methyl-4-pyridone-3-carboxamide	N1-methyl-4-pyridone-3-carboxamide	769-49-3	389671	HMDB0004194	C05843	440810	Pos Early
100001481	209	35153	128209	Lipid	Monoacylglycerol	2886	NAMED	JWPHORDRFVRZPP-KUBAVDMBSA-N	O=C(OCC(O)CO)CC/C=C\C/C=C\C/C=C\C/C=C\C/C=C\C/C=C\CC	1-docosahexaenoylglycerol (22:6)	1-docosahexaenoylglycerol (22:6)		10477810	HMDB0011587		53480995	Neg
100001483	209	35103	151003	Lipid	Monoacylglycerol	2904	NAMED	QRBGFYBOCBYOSN-HZJYTTRNSA-N	O=C(OCC(O)CO)CCCCCCCCC\C=C/C/C=C\CCCCC	1-dihomo-linoleoylglycerol (20:2)	1-dihomo-linoleoylglycerol (20:2)		21403143				Neg
100001485	400	34456	156123	Peptide	Gamma-glutamyl Amino Acid	654	NAMED	SNCKGJWJABDZHI-SIPWABPFSA-N	CCC(C)[C@@H](C(O)=O)NC(CC[C@@H](C(O)=O)N)=O	gamma-glutamylisoleucine*	gamma-glutamylisoleucine*		21403145	HMDB0011170		22885096	Pos Early
100001491	400	37123	156335	Carbohydrate	Aminosugar Metabolism	1452	NAMED	FDJKUWYYUZCUJX-UHFFFAOYSA-N	OC(C1(O)OC(C(NC(CO)=O)C(C1)O)C(C(CO)O)O)=O	N-glycolylneuraminate	N-glycolylneuraminate	1113-83-3	3794850	HMDB0000833	C03410	123802	Pos Early
100001501	402	35160	158710	Lipid	Fatty Acid Metabolism (Acyl Carnitine, Monounsaturated)	1904	NAMED	IPOLTUVFXFHAHI-WHIOSMTNSA-N	[O-]C(C[C@@H](OC(CCCCCCC/C=C\CCCCCCCC)=O)C[N+](C)(C)C)=O	oleoylcarnitine (C18:1)	oleoylcarnitine (C18:1)	38677-66-6	21403150	HMDB0005065		6441392	Pos Late
100001502	400	37092	156314	Peptide	Gamma-glutamyl Amino Acid	666	NAMED	FUZOZPRKGAXGOB-UHFFFAOYSA-N	O=C(O)C(CCC(NC(CC)C(O)=O)=O)N	gamma-glutamyl-2-aminobutyrate	gamma-glutamyl-2-aminobutyrate	16869-42-4	21403151				Pos Early
100001506	209	35129	128203	Cofactors and Vitamins	Tetrahydrobiopterin Metabolism	4413	NAMED	ZHQJVZLJDXWFFX-UHFFFAOYSA-N	O=C1C(C(NC2)=NC(N)=N1)=NC2C(O)C(O)C	dihydrobiopterin	dihydrobiopterin	6779-87-9	1808	HMDB0000038	C00268	135402011	Neg
100001507	400	34585	156126	Lipid	Fatty Acid, Monohydroxy	1975	NAMED	SJZRECIVHVDYJC-UHFFFAOYSA-N	OC(CCCO)=O	4-hydroxybutyrate (GHB)	4-hydroxybutyrate (GHB)	502-85-2	9984	HMDB0000710	C00989	10413	Pos Early
100001509	400	45095	157090	Amino Acid	Leucine, Isoleucine and Valine Metabolism	402	NAMED	IHCPDBBYTYJYIL-UHFFFAOYSA-N	CCC(C)C(OC(CC([O-])=O)C[N+](C)(C)C)=O	2-methylbutyrylcarnitine (C5)	2-methylbutyrylcarnitine (C5)	31023-25-3	4932320	HMDB0000378		6426901	Pos Early
100001510	209	32553	143728	Amino Acid	Tyrosine Metabolism	195	NAMED	CTYRPMDGLDAWRQ-UHFFFAOYSA-N	OS(OC1=CC=CC=C1)(=O)=O	phenol sulfate	phenol sulfate	937-34-8	67018	HMDB0060015	C02180	74426	Neg
100001511	402	33230	158553	Lipid	Lysophospholipid	2620	NAMED	LFUDDCMNKWEORN-KHPPLWFESA-N	O=P(OCC[N+](C)(C)C)([O-])OCC(O)COC(CCCCCCC/C=C\CCCCCC)=O	1-palmitoleoyl-GPC (16:1)*	1-palmitoleoyl-GPC (16:1)*		21403152	HMDB0010383		24779461	Pos Late
100001526	400	37059	156288	Lipid	Fatty Acid Synthesis	1489	NAMED	ZGNBLKBZJBJFDG-UHFFFAOYSA-N	O=C(CC(O)=O)OC(CC([O-])=O)C[N+](C)(C)C	malonylcarnitine	malonylcarnitine	853728-01-5	21403153	HMDB0002095		22833583	Pos Early
100001527	209	35436	128227	Lipid	Fatty Acid Metabolism (Acyl Glycine)	1823	NAMED	UPCKIPHSXMXJOX-UHFFFAOYSA-N	O=C(O)CNC(CCCCC)=O	hexanoylglycine	hexanoylglycine (C6)	24003-67-6	89859	HMDB0000701		99463	Neg
100001531	305	57549	211438	Nucleotide	Pyrimidine Metabolism, Uracil containing	4258	NAMED	PHENTZNALBMCQD-UHFFFAOYSA-N	CC(CNC(N)=O)C(O)=O	3-ureidoisobutyrate	3-ureidoisobutyrate	2905-86-4	141172	HMDB0002031	C05100	160663	Polar
100001540	400	46225	157124	Partially Characterized Molecules	Partially Characterized Molecules	6484	NAMED	NPWMTBZSRRLQNJ-UHFFFAOYSA-N	O=C(CCC1N)NC1=O	glutamine_degradant*	glutamine_degradant*	2353-44-8					Pos Early
100001541	209	36746	128281	Amino Acid	Leucine, Isoleucine and Valine Metabolism	400	NAMED	RILPIWOPNGRASR-UHFFFAOYSA-N	O=C(C(C(CC)C)O)O	2-hydroxy-3-methylvalerate	2-hydroxy-3-methylvalerate	488-15-3	144317	HMDB0000317		164623	Neg
100001550	400	33009	155996	Xenobiotics	Food Component/Plant	4956	NAMED	XULZWQRXYTVUTE-ZETCQYMHSA-N	C[N+]1(C)[C@@H](CCCC1)[C@]([O-])=O	homostachydrine*	homostachydrine*	1195-94-4	390180	HMDB0033433	C08283	441447	Pos Early
100001551	402	33228	158552	Lipid	Lysophospholipid	2653	NAMED	LAXQYRRMGGEGOH-JXRLJXCWSA-N	C[N+](C)(C)CCOP(OC[C@@](O)([H])COC(CCC\C=C/C\C=C/C/C=C\C/C=C\CCCCC)=O)([O-])=O	1-arachidonoyl-GPC (20:4n6)*	1-arachidonoyl-GPC (20:4n6)*		21403155	HMDB0010395	C05208	24779476	Pos Late
100001552	209	46205	144322	Lipid	Lysophospholipid	2648	NAMED	BBNHCUBQEQJHIG-FZZJNMCHSA-N	C[N+](C)(C)CCOP(OC[C@@](O)([H])COC(CCCCCC\C=C/C/C=C\C/C=C\CCCCC)=O)([O-])=O	1-dihomo-linolenoyl-GPC (20:3n3 or 6)*	1-dihomo-linolenoyl-GPC (20:3n3 or 6)*		21403156	HMDB0010394		52924055	Neg
100001553	402	33871	158577	Lipid	Lysophospholipid	2647	NAMED	YYQVCMMXPIJVHY-ZOIJLGJPSA-N	C[N+](C)(C)CCOP(OC[C@@](O)([H])COC(CCCCCCCCC/C=C\C/C=C\CCCCC)=O)([O-])=O	1-dihomo-linoleoyl-GPC (20:2)*	1-eicosadienoyl-GPC* (20:2)*		21403157	HMDB0010392			Pos Late
100001555	209	35255	213240	Lipid	Lysophospholipid	2630	NAMED	IQGPMZRCLCCXAG-VWLOTQADSA-N	OC[C@H](OC(CCCCCCCCCCCCCCCCC)=O)COP(OCC[N+](C)(C)C)([O-])=O	2-stearoyl-GPC (18:0)*	2-stearoyl-GPC* (18:0)*		8383879			24779491	Neg
100001556	209	48259	154240	Lipid	Lysophospholipid	2632	NAMED	SULIDBRAXVDKBU-AYZYJWAHSA-N	OC[C@H](OC(CCCCCCC/C=C\CCCCCCCC)=O)COP(OCC[N+](C)(C)C)([O-])=O	2-oleoyl-GPC (18:1)*	2-oleoyl-GPC (18:1)*		21403159	HMDB0061701		24779494	Neg
100001557	209	35257	126982	Lipid	Lysophospholipid	2635	NAMED	LSUXCWJOIAWGOU-YMVLYFQPSA-N	OC[C@H](OC(CCCCCCC/C=C\C/C=C\CCCCC)=O)COP(OCC[N+](C)(C)C)([O-])=O	2-linoleoyl-GPC (18:2)*	2-linoleoyl-GPC (18:2)*		21403160	HMDB0061700		71768169	Neg
100001561	209	47118	148450	Lipid	Lysophospholipid	2621	NAMED	GKXPPJQBVCKAGD-DJYGDJEFSA-N	OC[C@](OC(CCCCCCCC/C=C\CCCCC)=O)([H])COP(OCC[N+](C)(C)C)([O-])=O	2-palmitoleoyl-GPC (16:1)*	2-palmitoleoyl-GPC (16:1)*		21403164	HMDB10383		122164832	Neg
100001562	209	35253	126137	Lipid	Lysophospholipid	2619	NAMED	NEGQHKSYEYVFTD-HSZRJFAPSA-N	OC[C@](OC(CCCCCCCCCCCCCCC)=O)([H])COP(OCC[N+](C)(C)C)([O-])=O	2-palmitoyl-GPC (16:0)*	2-palmitoyl-GPC (16:0)*		21403165	HMDB0061702		15061532	Neg
100001565	209	46203	144319	Lipid	Lysophospholipid	2664	NAMED	FTLVGMFFHDRYDI-APPDJCNMSA-N	OC[C@](OC(CC\C=C/C/C=C\C/C=C\C/C=C\C/C=C\C/C=C\CC)=O)([H])COP(OCC[N+](C)(C)C)([O-])=O	2-docosahexaenoyl-GPC (22:6)*	2-docosahexaenoyl-GPC (22:6)*		21403168	HMDB0010404			Neg
100001566	402	33822	158576	Lipid	Lysophospholipid	2663	NAMED	LSOWKZULVQWMLY-FQPBCZPISA-N	C[N+](C)(C)CCOP(OC[C@](O)([H])COC(CC\C=C/C/C=C\C/C=C\C/C=C\C/C=C\C/C=C\CC)=O)([O-])=O	1-docosahexaenoyl-GPC (22:6)*	1-docosahexaenoyl-GPC (22:6)*		21403169	HMDB0010404		10415542	Pos Late
100001567	402	35631	158748	Lipid	Lysophospholipid	2680	NAMED	YVYMBNSKXOXSKW-HXUWFJFHSA-N	O=P(OCC[NH3+])([O-])OC[C@H](O)COC(CCCCCCCCCCCCCCC)=O	1-palmitoyl-GPE (16:0)	1-palmitoyl-GPE (16:0)	53862-35-4	7826019	HMDB0011503		9547069	Pos Late
100001569	402	35628	158745	Lipid	Lysophospholipid	2689	NAMED	PYVRVRFVLRNJLY-MZMPXXGTSA-N	O=P(OCC[NH3+])([O-])OC[C@H](O)COC(CCCCCCC\C=C/CCCCCCCC)=O	1-oleoyl-GPE (18:1)	1-oleoyl-GPE (18:1)	89576-29-4	7826021	HMDB0011506		9547071	Pos Late
100001570	402	36600	158788	Lipid	Lysophospholipid	2691	NAMED	DBHKHNGBVGWQJE-HZJYTTRNSA-N	O=P(OCC(O)COC(CCCCCCC/C=C\C/C=C\CCCCC)=O)(O)OCCN	1-linoleoyl-GPE (18:2)*	1-linoleoyl-GPE (18:2)*		21403170	HMDB0011507		52925130	Pos Late
100001571	402	35186	158719	Lipid	Lysophospholipid	2704	NAMED	ROPRRXYVXLDXQO-XSQXPFHXSA-N	NCCOP(OC[C@@](O)([H])COC(CCC\C=C/C\C=C/C/C=C\C/C=C\CCCCC)=O)(O)=O	1-arachidonoyl-GPE (20:4n6)*	1-arachidonoyl-GPE (20:4n6)*		21403171	HMDB0011517		42607465	Pos Late
100001577	209	48434	155079	Amino Acid	Urea cycle; Arginine and Proline Metabolism	511	NAMED	WMQMIOYQXNRROC-LURJTMIESA-N	OC([C@@H](NC(C)=O)CCCNC(N)=O)=O	N-acetylcitrulline	N-acetylcitrulline	33965-42-3	571213	HMDB0000856	C15532,C02851	656979	Neg
100001579	209	35675	128275	Lipid	Fatty Acid, Monohydroxy	1986	NAMED	JGHSBPIZNUXPLA-UHFFFAOYSA-N	O=C(O)C(O)CCCCCCCCCCCCCC	2-hydroxypalmitate	2-hydroxypalmitate	764-67-0	83805	HMDB0031057		12575964,92836,11065598	Neg
100001580	209	37478	127695	Lipid	Long Chain Polyunsaturated Fatty Acid (n3 and n6)	1594	NAMED	AVKOENOBFIYBSA-WMPRHZDHSA-N	OC(CC/C=C\C/C=C\C/C=C\C/C=C\C/C=C\CCCCC)=O	docosapentaenoate (n6 DPA; 22:5n6)	docosapentaenoate (n6 DPA; 22:5n6)	25182-74-5	4945614	HMDB0001976	C16513	6441454	Neg
100001586	305	46957	148205	Cofactors and Vitamins	Ascorbate and Aldarate Metabolism	4379	NAMED	RGHNJXZEOKUKBD-NRXMZTRTSA-N	OC([C@H](O)[C@H](O)[C@H](O)[C@@H](O)CO)=O	gulonate*	gulonate*	20246-53-1	7969943	HMDB0003290	C00800	152304	Polar
100001591	209	35434	128225	Xenobiotics	Benzoate Metabolism	4583	NAMED	YEIQSAXUPKPPBN-UHFFFAOYSA-N	O=C(O)CNC(CCC1=CC=CC=C1)=O	phenylpropionylglycine	phenylpropionylglycine	56613-60-6	134261	HMDB0000860		152323	Neg
100001593	400	44664	157075	Amino Acid	Lysine Metabolism	129	NAMED	NXJAXUYOQLTISD-UHFFFAOYSA-N	[O-]C(CC(C[N+](C)(C)C)OC(CCCC(O)=O)=O)=O	glutarylcarnitine (C5-DC)	glutarylcarnitine (C5-DC)	102636-82-8	21403175	HMDB0013130		71317118	Pos Early
100001594	400	35433	156184	Amino Acid	Leucine, Isoleucine and Valine Metabolism	369	NAMED	IGLHHSKNBDXCEY-UHFFFAOYSA-N	[O-]C(CC(C[N+](C)(C)C)OC(CC(O)(C)C)=O)=O	beta-hydroxyisovaleroylcarnitine	beta-hydroxyisovaleroylcarnitine	99159-87-2	21403176				Pos Early
100001597	400	35428	156182	Amino Acid	Leucine, Isoleucine and Valine Metabolism	405	NAMED	WURBQCVBQNMUQT-RMKNXTFCSA-N	[O-]C(CC(C[N+](C)(C)C)OC(/C(C)=C/C)=O)=O	tiglylcarnitine (C5:1-DC)	tiglyl carnitine (C5)	64191-86-2	17216200	HMDB0002366		22833596	Pos Early
100001604	209	35322	144222	Xenobiotics	Drug - Topical Agents	5996	NAMED	FPXPQMOQWJZYBL-UHFFFAOYSA-N	OC1=CC=C(C=C1)OS(=O)(O)=O	hydroquinone sulfate	hydroquinone sulfate	123-31-9	141624	HMDB0240263	C00530	161220	Neg
100001605	209	35320	143730	Xenobiotics	Benzoate Metabolism	4521	NAMED	MZPWKJZDOCIALD-UHFFFAOYSA-N	O=S(OC1=C(O)C=CC=C1)(O)=O	catechol sulfate	catechol sulfate	4918-96-1	2341024	HMDB0059724		3083879	Neg
100001606	305	35324	238705	Lipid	Sterol	3214	NAMED	BHYOQNUELFTYRT-UHFFFAOYSA-N	CC1(C2C(C)CCCC(C)C)C(CC2)C(CC=C3C4(CCC(OS(=O)(O)=O)C3)C)C4CC1	cholesterol sulfate	cholesterol sulfate	2864-50-8	4371550	HMDB00653,HMDB0000653	C18043	65076	Polar
100001609	209	36776	128301	Lipid	Sterol	3227	NAMED	SATGKQGFUDXGAX-MYWFJNCASA-N	O=C(C(CCC[C@H]([C@H]1CC[C@H]2[C@H]3[C@@H]([C@]4(C)C(C[C@H]3O)=CC(CC4)=O)CC[C@@]21C)C)C)O	7alpha-hydroxy-3-oxo-4-cholestenoate (7-Hoca)	7-HOCA	115538-85-7	2338765	HMDB0012458	C17337	3081085	Neg
100001612	400	35665	156223	Amino Acid	Glutamate Metabolism	57	NAMED	OPVPGKGADVGKTG-UHFFFAOYSA-N	CC(NC(C(NC(CCC(O)=O)C(O)=O)=O)CC(O)=O)=O	N-acetyl-aspartyl-glutamate (NAAG)	N-acetyl-aspartyl-glutamate (NAAG)	3106-85-2	5065	HMDB0001067	C12270	188803	Pos Early
100001613	209	35669	128271	Lipid	Fatty Acid, Dicarboxylate	1709	NAMED	HQHCYKULIHKCEB-UHFFFAOYSA-N	O=C(O)CCCCCCCCCCCCC(O)=O	tetradecanedioate (C14-DC)	tetradecanedioate (C14)	821-38-5	12630	HMDB0000872		13185	Neg
100001614	209	35678	128277	Lipid	Fatty Acid, Dicarboxylate	1713	NAMED	QQHJDPROMQRDLA-UHFFFAOYSA-N	O=C(O)CCCCCCCCCCCCCCC(O)=O	hexadecanedioate (C16-DC)	hexadecanedioate (C16)	505-54-4	10027	HMDB0000672	C19615	10459	Neg
100001615	209	36754	128289	Lipid	Fatty Acid, Dicarboxylate	1716	NAMED	BNJOQKFENDDGSC-UHFFFAOYSA-N	O=C(O)CCCCCCCCCCCCCCCCC(O)=O	octadecanedioate (C18-DC)	octadecanedioate (C18)	871-70-5	63283	HMDB0000782		70095	Neg
100001617	209	42395	128311	Lipid	Fatty Acid, Dicarboxylate	1701	NAMED	LWBHHRRTOZQPDM-UHFFFAOYSA-N	O=C(O)CCCCCCCCCC(O)=O	undecanedioate (C11-DC)	undecanedioate (C11-DC)	1852-04-6	15037	HMDB0000888		15816	Neg
100001618	209	35625	128233	Lipid	Monoacylglycerol	2868	NAMED	DCBSHORRWZKAKO-UHFFFAOYSA-N	O=C(CCCCCCCCCCCCC)OCC(O)CO	1-myristoylglycerol (14:0)	1-myristoylglycerol (14:0)	75685-84-6	71382	HMDB0011561	C01885	10957631	Neg
100001619	305	48857	160476	Lipid	Glycerolipid Metabolism	2867	NAMED	LLCSXHMJULHSJN-UHFFFAOYSA-N	OC(CO)COP(O)(OCC(CO)O)=O	glycerophosphoglycerol	glycerophosphoglycerol		388990	HMDB0240316	C03274	54575349	Polar
100001620	305	37455	146982	Lipid	Phospholipid Metabolism	2258	NAMED	JZNWSCPGTDBMEW-UHFFFAOYSA-N	O=P(OCCN)(O)OCC(CO)O	glycerophosphoethanolamine	glycerophosphoethanolamine	33049-08-0	110410	HMDB0000114	C01233	123874	Polar
100001621	305	47155	148603	Lipid	Phospholipid Metabolism	2260	NAMED	BMVUIWJCUQSHLZ-GFSNQTMESA-N	[H]C(C(O)(C(O)([C@](O)1[H])[H])[H])([C@@](OP(O)(OC[C@@]([H])(CO)O)=O)([C@]1(O)[H])[H])O	glycerophosphoinositol*	glycerophosphoinositol*	16824-65-0				167572	Polar
100001622	209	35632	128247	Xenobiotics	Benzoate Metabolism	4593	NAMED	ZHMMPVANGNPCBW-UHFFFAOYSA-N	CC(C1=CC=C(O)C=C1)C(O)=O	2-(4-hydroxyphenyl)propionate	2-(4-hydroxyphenyl)propionate	938-96-5	92601	HMDB0041683	C03080	102526	Neg
100001625	209	36807	127591	Lipid	Secondary Bile Acid Metabolism	3514	NAMED	DGABKXLVXPYZII-RRPBLVJSSA-N	C[C@]1(CC2)[C@](CC[C@@H]1[C@H](C)CCC(O)=O)([H])[C@@](C[C@H]3O)([H])[C@]2([H])[C@](CC4)(C)[C@]3([H])C[C@@H]4O	6beta-hydroxylithocholate	6beta-hydroxylithocholate	668-49-5	4446909	HMDB0000811	C15515	5283821	Neg
100001628	209	35649	128257	Carbohydrate	Pentose Phosphate Pathway	1274	NAMED	JDTUMPKOJBQPKX-UHFFFAOYSA-N	OP(OCC(C(C(C(C(CO)=O)O)O)O)O)(O)=O	sedoheptulose-7-phosphate	sedoheptulose-7-phosphate	2646-35-7	596	HMDB0001068	C05382	616	Neg
100001635	400	35651	156211	Xenobiotics	Chemical	6186	NAMED	WQXNXVUDBPYKBA-YFKPBYRVSA-N	O=[C@](O)[C@H]1N=C(C)NCC1	ectoine	ectoine	96702-03-3	112069	HMDB0240650	C06231	126041	Pos Early
100001654	209	34214	142524	Lipid	Lysophospholipid	2749	NAMED	LXUGKKVCSTYZFK-OSKOXSHBSA-N	[H]C(C(O)(C(O)([C@](O)1[H])[H])[H])([C@@](OP(O)(OC[C@@]([H])(COC(CCC/C=C\C/C=C\C/C=C\C/C=C\CCCCC)=O)O)=O)([C@]1(O)[H])[H])O	1-arachidonoyl-GPI (20:4)*	1-arachidonoyl-GPI (20:4)*			HMDB0061690		121596217	Neg
100001655	209	35305	146820	Lipid	Lysophospholipid	2735	NAMED	UOXRPRZMAROFPH-AQFLIPHUSA-N	[H]C(C(O)(C(O)([C@](O)1[H])[H])[H])([C@@](OP(O)(OC[C@@]([H])(COC(CCCCCCCCCCCCCCC)=O)O)=O)([C@]1(O)[H])[H])O	1-palmitoyl-GPI (16:0)	1-palmitoyl-GPI (16:0)			HMDB0061695		71296207	Neg
100001662	400	36747	156251	Lipid	Carnitine Metabolism	1949	NAMED	JHPNVNIEXXLNTR-UHFFFAOYSA-N	C[N+](C)(C)CCCC([O-])=O	deoxycarnitine	deoxycarnitine	6249-56-5	705	HMDB0001161	C01181	22620	Pos Early
100001664	209	48130	151119	Nucleotide	Purine Metabolism, Adenine containing	4195	NAMED	VKGZCEJTCKHMRL-UHFFFAOYSA-N	OCC(O1)C(O)C(O)C1N2C=NC3=C(NC(CC(O)=O)C(O)=O)N=CN=C32	N6-succinyladenosine	N6-succinyladenosine	4542-23-8		HMDB0000912		165243	Neg
100001668	400	61868	218616	Amino Acid	Histidine Metabolism	98	NAMED	AHPWEWASPTZMEK-UHFFFAOYSA-N	OCC(O1)C(O)C(O)C1N2C=NC(CC(O)=O)=C2	1-ribosyl-imidazoleacetate*	1-ribosyl-imidazoleacetate*	29605-99-0	4292299	HMDB0002331	C05131	440569	Pos Early
100001674	209	32815	142522	Lipid	Lysophospholipid	2705	NAMED	YWOCITMXHHTBAW-XSQXPFHXSA-N	OC[C@](OC(CCC\C=C/C\C=C/C/C=C\C/C=C\CCCCC)=O)([H])COP(OCCN)(O)=O	2-arachidonoyl-GPE (20:4)*	2-arachidonoyl-GPE (20:4)*			HMDB0011487		53480936	Neg
100001721	305	36751	145848	Amino Acid	Lysine Metabolism	108	NAMED	VEYYWZRYIYDQJM-ZETCQYMHSA-N	OC([C@H](CCCCN)NC(C)=O)=O	N2-acetyllysine	N2-acetyllysine	1946-82-3	83869	HMDB0000446	C12989	92907	Polar
100001730	305	62952	220827	Lipid	Fatty Acid, Dihydroxy	2055	NAMED	DZAIOXUZHHTJKN-UHFFFAOYSA-N	O=C(CC(CO)O)O	3,4-dihydroxybutyrate	3,4-dihydroxybutyrate	51267-44-8		HMDB0000337		150929	Polar
100001734	209	36752	128287	Amino Acid	Lysine Metabolism	109	NAMED	DTERQYGMUDWYAZ-ZETCQYMHSA-N	N[C@@H](CCCCNC(C)=O)C(O)=O	N6-acetyllysine	N6-acetyllysine	692-04-6	83801	HMDB0000206	C02727	92832	Neg
100001739	209	35718	143707	Lipid	Long Chain Polyunsaturated Fatty Acid (n3 and n6)	1590	NAMED	AHANXAKGNAKFSK-PDBXOOCHSA-N	CC\C=C/C\C=C/C\C=C/CCCCCCCCCC(O)=O	dihomo-linolenate (20:3n3 or n6)	dihomolinolenate (20:3n3 or 3n6)	17046-59-2	4471954	HMDB0002925	C03242	5280581	Neg
100001740	305	46142	146560	Carbohydrate	Fructose, Mannose and Galactose Metabolism	1369	NAMED	FBPFZTCFMRRESA-UHFFFAOYSA-N	OCC(O)C(O)C(O)C(O)CO	mannitol/sorbitol	mannitol/sorbitol		440	HMDB0000247,HMDB0000765	C00392,C00794	5780,6251	Polar
100001755	209	36098	144223	Xenobiotics	Benzoate Metabolism	4548	NAMED	IETVQHUKTKKBFF-UHFFFAOYSA-N	O=S(OC1=CC=C(C=C)C=C1)(O)=O	4-vinylphenol sulfate	4-vinylphenol sulfate	2628-17-3	4932200	HMDB0062775	C05627	6426766	Neg
100001756	209	36099	144224	Xenobiotics	Benzoate Metabolism	4546	NAMED	DWZGLEPNCRFCEP-UHFFFAOYSA-N	O=S(OC1=CC=C(CC)C=C1)(O)=O	4-ethylphenylsulfate	4-ethylphenyl sulfate	123-07-9		HMDB0062551	C13637	20822574	Neg
100001765	305	36749	146966	Lipid	Fatty Acid, Dicarboxylate	1687	NAMED	SYEOWUNSTUDKGM-UHFFFAOYSA-N	O=C(O)CC(C)CCC(O)=O	3-methyladipate	3-methyladipate	3058-01-3	11789	HMDB0000555		12292	Polar
100001767	209	48428	155071	Xenobiotics	Food Component/Plant	5141	NAMED	VTYFITADLSVOAS-UHFFFAOYSA-N	NC(C(O)=O)CCCCN1C(C=O)=CC=C1CO	pyrraline	pyrraline	74509-14-1	19980286	HMDB0033143	C21013	14274616	Neg
100001768	400	36713	156246	Carbohydrate	Advanced Glycation End-product	1453	NAMED	NUXSIDPKKIEIMI-UHFFFAOYSA-N	OC(CNCCCCC(C(O)=O)N)=O	N6-carboxymethyllysine	N6-carboxymethyllysine	5746-04-3	11217184	HMDB0240347		123800	Pos Early
100001777	209	36602	146821	Lipid	Lysophospholipid	2741	NAMED	UGDOFRYHDCDVHD-JCASDCETSA-N	[H]C(C(O)(C(O)([C@](O)1[H])[H])[H])([C@@](OP(O)(OC[C@@]([H])(COC(CCCCCCC/C=C\CCCCCCCC)=O)O)=O)([C@]1(O)[H])[H])O	1-oleoyl-GPI (18:1)	1-oleoyl-GPI (18:1)			HMDB0061693		86289645	Neg
100001778	209	36594	146822	Lipid	Lysophospholipid	2743	NAMED	SAHCQBPGXQFTRA-WNOZMNFTSA-N	[H]C(C(O)(C(O)([C@](O)1[H])[H])[H])([C@@](OP(O)(OC[C@@]([H])(COC(CCCCCCC/C=C\C/C=C\CCCCC)=O)O)=O)([C@]1(O)[H])[H])O	1-linoleoyl-GPI (18:2)*	1-linoleoyl-GPI* (18:2)*			HMDB0240597		11124828	Neg
100001801	209	37180	143731	Xenobiotics	Benzoate Metabolism	4577	NAMED	URAJEEIDMHNVKE-UHFFFAOYSA-N	CC1=CC(N)=C(OS(=O)(O)=O)C=C1	2-amino-p-cresol sulfate	2-amino-p-cresol sulfate						Neg
100001805	400	37070	156293	Nucleotide	Purine and Pyrimidine Metabolism	4305	NAMED	CAAULPUQFIIOTL-UHFFFAOYSA-N	O=P(O)(O)OC	methylphosphate	methylphosphate	7023-27-0	12578	HMDB61711		13130	Pos Early
100001806	209	36845	143732	Xenobiotics	Benzoate Metabolism	4582	NAMED	CYGSXDXRHXMAOV-UHFFFAOYSA-N	O=S(OC1=CC=CC=C1C)(O)=O	o-cresol sulfate	o-cresol sulfate		9790277	HMDB0011635		11615528	Neg
100001810	400	36808	156271	Amino Acid	Urea cycle; Arginine and Proline Metabolism	505	NAMED	YDGMGEXADBMOMJ-LURJTMIESA-N	N[C@@H](CCCNC(N(C)C)=N)C(O)=O	dimethylarginine (SDMA + ADMA)	dimethylarginine (ADMA + SDMA)	102783-24-4	110375	HMDB0003334,HMDB0001539	C21189,C03626	123831,169148	Pos Early
100001843	305	37063	211037	Peptide	Gamma-glutamyl Amino Acid	648	NAMED	WQXXXVRAFAKQJM-WHFBIAKZSA-N	C[C@H](NC(CC[C@H](N)C(O)=O)=O)C(O)=O	gamma-glutamylalanine	gamma-glutamylalanine	5875-41-2	389104	HMDB0029142	C03738	440103	Polar
100001851	305	37076	147598	Amino Acid	Glycine, Serine and Threonine Metabolism	11	NAMED	JJIHLJJYMXLCOY-BYPYZUCNSA-N	OC[C@@H](C(O)=O)NC(C)=O	N-acetylserine	N-acetylserine	97-14-3	58744	HMDB0002931		65249	Polar
100001856	402	42448	164202	Lipid	Phosphatidylethanolamine (PE)	2443	NAMED	JQKOHRZNEOQNJE-AYBNWLFXSA-N	O=C(CCCCCCC/C=C/CCCCCCCC)O[C@@H](COP(OCCN)(O)=O)COC(CCCCCCCCCCCCCCCCC)=O	1-stearoyl-2-oleoyl-GPE (18:0/18:1)	1-stearoyl-2-oleoyl-GPE (18:0/18:1)			HMDB0008993		9546742	Pos Late
100001859	305	37112	145854	Lipid	Inositol Metabolism	2220	NAMED	CDAISMWEOUEBRE-LKPKBOIGSA-N	O[C@@H]1[C@@H](O)[C@H](O)[C@@H](O)[C@@H](O)[C@@H]1O	chiro-inositol	chiro-inositol	643-12-9	10254647	HMDB0240209	C19891		Polar
100001868	209	37181	144354	Xenobiotics	Food Component/Plant	5112	NAMED	KFDHKOFCRYUXLA-UHFFFAOYSA-N	C=CCC1=CC=C(OS(=O)(O)=O)C=C1	4-allylphenol sulfate	4-allylphenol sulfate					66633409	Neg
100001869	402	42450	164205	Lipid	Phosphatidylcholine (PC)	2351	NAMED	PSVRFUPOQYJOOZ-QNPWAGBNSA-N	C[N+](C)(CCOP([O-])(OC[C@@]([H])(COC(CCCCCCCCCCCCCCCCC)=O)OC(CCC/C=C\C/C=C\C/C=C\C/C=C\CCCCC)=O)=O)C	1-stearoyl-2-arachidonoyl-GPC (18:0/20:4)	1-stearoyl-2-arachidonoyl-GPC (18:0/20:4)	35418-59-8	17347139	HMDB0008048		16219824	Pos Late
100001870	402	42449	164197	Lipid	Phosphatidylethanolamine (PE)	2428	NAMED	HBZNVZIRJWODIB-NHCUFCNUSA-N	O=C(CCCCCCC/C=C\C/C=C\CCCCC)O[C@@H](COP(OCCN)(O)=O)COC(CCCCCCCCCCCCCCC)=O	1-palmitoyl-2-linoleoyl-GPE (16:0/18:2)	1-palmitoyl-2-linoleoyl-GPE (16:0/18:2)		7825697	HMDB0005322		9546747	Pos Late
100001872	402	52235	164206	Lipid	Phosphatidylserine (PS)	2526	NAMED	SVOUGFFDROZBJI-DNALCEECSA-N	O=C(CCCCCCCCCCCCCCCCC)OC[C@]([H])(COP(O)(OC[C@]([NH3+])(C([O-])=O)[H])=O)OC(CCC/C=C\C/C=C\C/C=C\C/C=C\CCCCC)=O	1-stearoyl-2-arachidonoyl-GPS (18:0/20:4)	1-stearoyl-2-arachidonoyl-GPS (18:0/20:4)			HMDB0012383		24779545	Pos Late
100001876	402	52605	165336	Lipid	Sphingolipid Synthesis	3021	NAMED	YHEDRJPUIRMZMP-UHFFFAOYSA-N	OP(O)(OCC(C(CCCCCCCCCCCCCCC)O)N)=O	sphinganine-1-phosphate	sphinganine-1-phosphate	19794-97-9	505	HMDB0001383		520	Pos Late
100001878	402	57369	210896	Lipid	Hexosylceramides (HCER)	3084	NAMED	WBOZIXHPUPAOIA-YEWIENRVSA-N	OC(C([C@H]([C@H]1CO)O)O)[C@@H](O1)OC[C@@]([H])([C@](O)(/C=C/CCCCCCCCCCCCC)[H])NC(CCCCCCCCCCCCC/C=C\CCCCCCCC)=O	glycosyl-N-nervonoyl-sphingosine (d18:1/24:1)*	glycosyl-N-nervonoyl-sphingosine (d18:1/24:1)*			HMDB0004975,HMDB0010712		20057357,53480656	Pos Late
100001882	402	52234	164199	Lipid	Hexosylceramides (HCER)	3079	NAMED	YMYQEDCYNANIPI-OQRGLTFYSA-N	OC1C(CO)OC(OC[C@H](NC(CCCCCCCCCCCCCCCCC)=O)[C@H](O)/C=C/CCCCCCCCCCCCC)C(O)C1O	glycosyl-N-stearoyl-sphingosine (d18:1/18:0)	glycosyl-N-stearoyl-sphingosine (d18:1/18:0)						Pos Late
100001948	400	37058	156287	Energy	TCA Cycle	1465	NAMED	HAEVNYBCYZZDFL-UHFFFAOYSA-N	[O-]C(CC(C[N+](C)(C)C)OC(CCC(O)=O)=O)=O	succinylcarnitine (C4-DC)	succinylcarnitine (C4-DC)	256928-74-2	28639166	HMDB0061717		71464481	Pos Early
100001950	402	32586	158528	Cofactors and Vitamins	Hemoglobin and Porphyrin Metabolism	4431	NAMED	BPYKTIZUTYGOLE-VVCLLGATSA-N	CC(C(N/1)=O)=C(C=C)C1=C/C2=C(C)C(CCC(O)=O)=C(CC3=C(CCC(O)=O)C(C)=C(/C=C4NC(C(C=C)=C\4C)=O)N3)N2	bilirubin (E,E)*	bilirubin (E,E)*		4474753	HMDB0240584		129320511	Pos Late
100001956	400	37431	156358	Amino Acid	Urea cycle; Arginine and Proline Metabolism	525	NAMED	CWLQUGTUXBXTLF-UHFFFAOYSA-N	O=C(O)C1N(C)CCC1	N-methylproline	N-methylproline	475-11-6	541	HMDB0094696		643474	Pos Early
100002060	209	44633	142529	Lipid	Lysophospholipid	2715	NAMED	XEVRBOQZSXWGQO-FJXNLOIUSA-N	NCCOP(OC[C@](O)([H])COC(CC\C=C/C/C=C\C/C=C\C/C=C\C/C=C\C/C=C\CC)=O)(O)=O	1-docosahexaenoyl-GPE (22:6)*	1-docosahexaenoyl-GPE (22:6)*						Neg
100002070	400	37253	156347	Lipid	Fatty Acid, Dicarboxylate	1681	NAMED	HWXBTNAVRSUOJR-UHFFFAOYSA-N	O=C(O)CCC(O)C(O)=O	2-hydroxyglutarate	2-hydroxyglutarate	40951-21-1	42	HMDB0059655	C02630	43	Pos Early
100002102	209	37432	127667	Nucleotide	Pyrimidine Metabolism, Uracil containing	4262	NAMED	LJLLAWRMBZNPMO-UHFFFAOYSA-N	CC(NCCC(O)=O)=O	N-acetyl-beta-alanine	N-acetyl-beta-alanine	3025-95-4	68881	HMDB0061880	C01073	76406	Neg
100002103	400	62100	218945	Amino Acid	Methionine, Cysteine, SAM and Taurine Metabolism	453	NAMED	OLVVOVIFTBSBBH-UHFFFAOYSA-N	OC1C(O)C(O)C(CSC)O1	5-methylthioribose**	5-methylthioribose**	23656-67-9	480	HMDB0001087		6419710	Pos Early
100002106	402	37529	164200	Lipid	Sphingomyelins	3140	NAMED	NBEADXWAAWCCDG-QDDWGVBQSA-N	O=C(CCCCCCC/C=C\CCCCCCCC)N[C@@](COP([O-])(OCC[N+](C)(C)C)=O)([C@](O)(/C=C/CCCCCCCCCCCCC)[H])[H]	sphingomyelin (d18:1/18:1, d18:2/18:0)	sphingomyelin (d18:1/18:1, d18:2/18:0)	108392-10-5	4947837	HMDB0012101		6443882	Pos Late
100002107	402	37506	164195	Lipid	Sphingomyelins	3124	NAMED	RWKUXQNLWDTSLO-GWQJGLRPSA-N	CCCCCCCCCCCCCCCC(N[C@@](COP([O-])(OCC[N+](C)(C)C)=O)([C@](O)(/C=C/CCCCCCCCCCCCC)[H])[H])=O	palmitoyl sphingomyelin (d18:1/16:0)	palmitoyl sphingomyelin (d18:1/16:0)	6254-89-3	8115562	HMDB0010169		9939941	Pos Late
100002113	400	37443	156369	Amino Acid	Methionine, Cysteine, SAM and Taurine Metabolism	474	NAMED	ADVPTQAUNPRNPO-UHFFFAOYSA-N	O=C(C(CS(O)=O)N)O	cysteine sulfinic acid	cysteine sulfinic acid	207121-48-0	107	HMDB0000996	C00606	109	Pos Early
100002137	209	37372	143751	Lipid	Eicosanoid	2153	NAMED	KGIJOOYOSFUGPC-XTDASVJISA-N	OC(CCCC(O)/C=C/C=C\C/C=C\C/C=C\CCCCC)=O	5-HETE	5-HETE	73307-52-5	8038582	HMDB0011134	C04805	5280733	Neg
100002153	400	38100	156425	Xenobiotics	Food Component/Plant	4822	NAMED	MUNWAHDYFVYIKH-RITPCOANSA-N	O[C@H]1C[N+](C)(C)[C@H]([C@@]([O-])=O)C1	betonicine	betonicine	515-25-3	144333	HMDB0029412	C08269	164642	Pos Early
100002154	400	37459	156384	Xenobiotics	Food Component/Plant	4916	NAMED	SSISHJJTAXXQAX-UHFFFAOYSA-N	S=C1NC(CC(C([O-])=O)[N+](C)(C)C)=CN1	ergothioneine	ergothioneine	58511-63-0	2297320	HMDB0003045	C05570	5351619	Pos Early
100002165	209	46293	144526	Lipid	Eicosanoid	2150	NAMED	MCRJLMXYVFDXLS-QGQBRVLBSA-N	OC(CCC/C=C\C\C=C/C=C/C(C/C=C\C/C=C\CC)O)=O	12-HEPE	12-HEPE	81187-21-5	8217157	HMDB0010202		10041593	Neg
100002167	209	37536	143754	Lipid	Eicosanoid	2159	NAMED	ZNHVWPKMFKADKW-VXBMJZGYSA-N	OC(CCC/C=C\C\C=C/C=C/C(C/C=C\CCCCC)O)=O	12-HETE	12-HETE	73837-14-6,71030-37-0	21509475	HMDB0006111	C14777	5283155	Neg
100002173	402	37418	158898	Lipid	Lysophospholipid	2617	NAMED	RJZVWDTYEWCUAR-QFIPXVFZSA-N	O=P(OCC[N+](C)(C)C)([O-])OC[C@@H](O)COC(CCCCCCCCCCCCCC)=O	1-pentadecanoyl-GPC (15:0)*	1-pentadecanoyl-GPC (15:0)*			HMDB0010381		24779458	Pos Late
100002183	400	38127	156445	Amino Acid	Methionine, Cysteine, SAM and Taurine Metabolism	444	NAMED	YDBYJHTYSHBBAU-UHFFFAOYSA-N	NC(CC[S+](C)C)C([O-])=O	S-methylmethionine	S-methylmethionine	3493-12-7	8351775	HMDB0038670	C05319	458	Pos Early
100002185	209	38116	127709	Amino Acid	Tryptophan Metabolism	321	NAMED	KMAKOBLIOCQGJP-UHFFFAOYSA-N	O=C(C1=CNC2=C1C=CC=C2)O	indole-3-carboxylate	indole-3-carboxylate	771-50-6		HMDB0003320	C19837	69867	Neg
100002196	209	37752	145686	Lipid	Fatty Acid, Monohydroxy	2032	NAMED	HNICUWMFWZBIFP-IRQZEAMPSA-N	OC(CCCCCCC/C=C\C=C\[C@H](CCCCC)O)=O	13-HODE + 9-HODE	13-HODE + 9-HODE			HMDB0004670,HMDB0004667	C14767,C14762	5312830,5282945,1424,5282947,5282944	Neg
100002204	400	43256	156988	Amino Acid	Histidine Metabolism	77	NAMED	FKTXRTPBUWLETL-UHFFFAOYSA-N	O=C(O)C(NC(C)=O)CC1=CN=CN1C	N-acetyl-3-methylhistidine*	N-acetyl-3-methylhistidine*	37841-04-6	19993498	HMDB0240341		193270	Pos Early
100002227	402	38125	164218	Lipid	Sterol	3240	NAMED	NYOXRYYXRWJDKP-UHFFFAOYSA-N	CC12C(CCC3C2CCC4(C)C3CCC4C(CCCC(C)C)C)=CC(CC1)=O	4-cholesten-3-one	4-cholesten-3-one	601-57-0	427	HMDB0000921	C00599	91477	Pos Late
100002250	209	38349	141866	Amino Acid	Tyrosine Metabolism	226	NAMED	IACOAKYXFIWAQN-UHFFFAOYSA-N	COC1=CC(CC(O)=O)=CC=C1OS(=O)(O)=O	homovanillate sulfate	homovanillate sulfate	38339-06-9	21896746	HMDB11719		29981063	Neg
100002253	209	38637	141886	Xenobiotics	Food Component/Plant	4876	NAMED	YAADMLWHGMUGQL-VOTSOKGWSA-N	O=C(NCC(O)=O)/C=C/C1=CC=CC=C1	cinnamoylglycine	cinnamoylglycine	16534-24-0	618829	HMDB0011621		709625	Neg
100002254	402	38625	159084	Lipid	Endocannabinoid	2181	NAMED	OTGQIQQTPXJQRG-UHFFFAOYSA-N	OCCNC(CCCCCCCCCCCCCCCCC)=O	stearoyl ethanolamide	stearoyl ethanolamide	111-57-9	25958	HMDB0013078		27902	Pos Late
100002259	402	38178	159020	Lipid	Fatty Acid Metabolism (Acyl Carnitine, Monounsaturated)	1898	NAMED	OQWOHRPOYAVIOK-KTKRTIGZSA-N	O=C([O-])CC(OC(CC/C=C\CCCCC)=O)C[N+](C)(C)C	cis-4-decenoylcarnitine (C10:1)	cis-4-decenoylcarnitine (C10:1)	98930-66-6	28639171	HMDB0013205		57357170	Pos Late
100002284	305	62950	220825	Lipid	Fatty Acid, Dihydroxy	2051	NAMED	LOUGYXZSURQALL-GBXIJSLDSA-N	C[C@@H](O)[C@H](O)C(O)=O	2S,3R-dihydroxybutyrate	2S,3R-dihydroxybutyrate	5057-93-2	9139682	HMDB0002453		10964471	Polar
100002300	209	38159	127719	Nucleotide	Pyrimidine Metabolism, Cytidine containing	4286	NAMED	LUCHPKXVUGJYGU-XLPZGREQSA-N	O[C@H]1C[C@H](N2C=C(C)C(N)=NC2=O)O[C@@H]1CO	5-methyl-2'-deoxycytidine	5-methyl-2'-deoxycytidine	838-07-3	389065	HMDB0002224	C03592	440055	Neg
100002324	400	47897	157694	Xenobiotics	Drug - Other	6019	NAMED	GBFLZEXEOZUWRN-UHFFFAOYSA-N	OC(CSCC(N)C(O)=O)=O	S-carboxymethyl-cysteine	S-carboxymethyl-cysteine	638-23-3	1050	HMDB0029415	C03727	193653	Pos Early
100002356	209	38296	141846	Lipid	Fatty Acid, Branched	1666	NAMED	YETXGSGCWODRAA-UHFFFAOYSA-N	OC(CCCCCCCCCCCCCCCC(C)C)=O	(16 or 17)-methylstearate (a19:0 or i19:0)	(16 or 17)-methylstearate (a19:0 or i19:0)	2724-59-6	2340933	HMDB0037397		3083779	Neg
100002367	305	63109	221751	Lipid	Fatty Acid, Dihydroxy	2052	NAMED	LOUGYXZSURQALL-PWNYCUMCSA-N	OC([C@H](O)[C@H](O)C)=O	2R,3R-dihydroxybutyrate	2R,3R-dihydroxybutyrate	759-06-8	17215960	HMDB0000498		13120901	Polar
100002397	305	62101	218946	Amino Acid	Glutamate Metabolism	48	NAMED	COJBGNAUUSNXHX-UHFFFAOYSA-N	NC(CCC(C(O)=O)=O)=O	alpha-ketoglutaramate*	alpha-ketoglutaramate*	18465-19-5		HMDB0001552	C00940	48	Polar
100002417	305	38276	152194	Xenobiotics	Food Component/Plant	4795	NAMED	JTEYKUFKXGDTEU-UHFFFAOYSA-N	OC(C(O)C(C)(O)C)=O	2,3-dihydroxyisovalerate	2,3-dihydroxyisovalerate	1756-18-9	657	HMDB0012141	C04039	677	Polar
100002458	305	57747	213342	Amino Acid	Leucine, Isoleucine and Valine Metabolism	372	NAMED	WKRBKYFIJPGYQC-DUXPYHPUSA-N	OC(C/C(C)=C/C(O)=O)=O	3-methylglutaconate	3-methylglutaconate	5746-90-7	1267861	HMDB0000522		1551553	Polar
100002462	400	43582	208402	Amino Acid	Lysine Metabolism	122	NAMED	OWGKYELXGFKIHH-MYLOADSESA-N	O[C@@H]1[C@@H](O)[C@@H](O)[C@@H](CO)OC1OC(CCC(N)C(O)=O)CN	5-(galactosylhydroxy)-lysine	5-(galactosylhydroxy)-lysine	32448-36-5				66995551	Pos Early
100002466	400	62103	218949	Amino Acid	Glutathione Metabolism	585	NAMED	ZHRLECIZINSPKL-AKGZTFGVSA-N	OC(CNC(C(N)CSSC[C@@H](C(O)=O)N)=O)=O	cysteinylglycine disulfide*	cysteinylglycine disulfide*	70555-24-7	17215992	HMDB0000709		22833544	Pos Early
100002500	400	43493	157017	Amino Acid	Histidine Metabolism	83	NAMED	NRXIKWMTVXPVEF-BYPYZUCNSA-N	OC([C@@H](NC=N)CCC(O)=O)=O	formiminoglutamate	formiminoglutamate	816-90-0	388370	HMDB0000854	C00439	439233	Pos Early
100002514	305	40473	152212	Amino Acid	Histidine Metabolism	79	NAMED	VWFWNXQAMGDPGG-UHFFFAOYSA-N	O=C1NC(C(CCC(O)=O)N1)=O	hydantoin-5-propionate	hydantoin-5-propionate	5624-26-0	761	HMDB0001212	C05565	782	Polar
100002528	209	46960	148213	Xenobiotics	Chemical	6118	NAMED	QAOWNCQODCNURD-UHFFFAOYSA-N	OS(O)(=O)=O	sulfate*	sulfate*	14808-79-8	1086	HMDB01448	C00059	5152822	Neg
100002544	400	40499	156749	Amino Acid	Glutamate Metabolism	53	NAMED	HBDWQSHEVMSFGY-SCQFTWEKSA-N	OC(C(O)=O)C[C@@H](C(O)=O)N	4-hydroxyglutamate	4-hydroxyglutamate	2485-33-8	388936	HMDB0001344	C03079	439902	Pos Early
100002619	305	53237	179411	Carbohydrate	Pentose Metabolism	1305	NAMED	HSNZZMHEPUFJNZ-SHUUEZRQSA-N	OCC([C@@H](O)[C@H](O)[C@H](O)[C@H](O)CO)=O	sedoheptulose	sedoheptulose	3019-74-7	4573620	HMDB0003219	C02076	5459879	Polar
100002749	305	39592	147616	Amino Acid	Methionine, Cysteine, SAM and Taurine Metabolism	463	NAMED	IDIDJDIHTAOVLG-VKHMYHEASA-N	OC([C@H](CSC)N)=O	S-methylcysteine	S-methylcysteine	1187-84-4	22826	HMDB0002108		24417,7058174,88180	Polar
100002763	400	39582	156587	Cofactors and Vitamins	Nicotinate and Nicotinamide Metabolism	4336	NAMED	USSFUVKEHXDAPM-UHFFFAOYSA-N	O=C(C1=C[N+]([O-])=CC=C1)N	nicotinamide N-oxide	nicotinamide N-oxide	1986-81-8	65522	HMDB0002730		72661	Pos Early
100002769	400	57461	211115	Amino Acid	Urea cycle; Arginine and Proline Metabolism	529	NAMED	BMFMQGXDDJALKQ-BYPYZUCNSA-N	N=C(N)NCCC[C@H](O)C(O)=O	argininate*	argininate*	157-07-3	140984	HMDB0003148		160437	Pos Early
100002773	402	39788	159190	Xenobiotics	Food Component/Plant	5079	NAMED	JVKYZPBMZPJNAJ-OQFNDJACSA-N	O[C@H](C1)CC[C@@]2(C)C1=CC[C@]3([H])[C@]2([H])CC[C@@]4(C)[C@@]3([H])C[C@@]5([H])[C@]4([H])[C@H](C)[C@]6([H])N5C[C@@H](C)CC6	solanidine	solanidine	80-78-4	59150	HMDB0003236	C06543	65727	Pos Late
100002784	400	55072	208196	Amino Acid	Urea cycle; Arginine and Proline Metabolism	498	NAMED	ARBHXJXXVVHMET-UHFFFAOYSA-N	OC(C(CCC/N=C(N)/N)=O)=O	2-oxoarginine*	2-oxoarginine*	3715-10-4	542	HMDB0004225	C03771	558	Pos Early
100002796	209	62873	220667	Lipid	Medium Chain Fatty Acid	1513	NAMED	XKZKQTCECFWKBN-SREVYHEPSA-N	OC(CC\C=C/CCCCC)=O	cis-4-decenoate (10:1n6)*	cis-4-decenoate (10:1n6)*	505-90-8	4471776	HMDB0004980		5282726	Neg
100002849	209	39603	141920	Xenobiotics	Chemical	6125	NAMED	IWJBVMJWSPZNJH-XWBUKDKVSA-N	O[C@H]([C@H]1O)[C@@H]([C@@H]([C@](O)=O)OC1OCC)O	ethyl glucuronide	ethyl glucuronide	17685-04-0	134174	HMDB0010325		18392195	Neg
100002868	402	39792	159193	Lipid	Lysophospholipid	2656	NAMED	UIINDYGXBHJQHX-GDLZYMKVSA-N	CCCCCCCCCCCCCCCCCCCCCC(OC[C@H](COP([O-])(OCC[N+](C)(C)C)=O)O)=O	1-behenoyl-GPC (22:0)	1-behenoyl-GPC (22:0)	125146-65-8		HMDB0010398		24779479	Pos Late
100002873	402	49617	161405	Lipid	Lysophospholipid	2667	NAMED	SKJMUADLQLZAGH-WJOKGBTCSA-N	CCCCCCCCCCCCCCCCCCCCCCCC(OC[C@H](COP([O-])(OCC[N+](C)(C)C)=O)O)=O	1-lignoceroyl-GPC (24:0)	1-lignoceroyl-GPC (24:0)	325171-59-3	24766539	HMDB0010405		24779481	Pos Late
100002875	402	52474	165152	Lipid	Lysoplasmalogen	2852	NAMED	HTZINLFNXLXRBC-CQLBIITFSA-N	CCCCCCCCCCCCCC/C=C\OC[C@H](COP([O-])(OCC[N+](C)(C)C)=O)O	1-(1-enyl-palmitoyl)-GPC (P-16:0)*	1-(1-enyl-palmitoyl)-GPC (P-16:0)*		9093054	HMDB0010407		10917802	Pos Late
100002910	400	62946	220814	Amino Acid	Histidine Metabolism	94	NAMED	UJCGYTCAMOHYCG-UHFFFAOYSA-N	O=C(O)CC1=CN=CN1C	1-methyl-5-imidazoleacetate	1-methyl-5-imidazoleacetate	4200-48-0	4954265	HMDB04988		6451814	Pos Early
100002912	209	39378	143716	Lipid	Secondary Bile Acid Metabolism	3539	NAMED	BHTRKEVKTKCXOH-BWIGJTJCSA-N	O=C(NCCS(=O)(O)=O)CC[C@@H](C)C1CC[C@@]2([H])[C@]3([H])[C@@H](O)CC4C[C@H](O)CC[C@]4(C)[C@@]3([H])CC[C@@]21C	tauroursodeoxycholate	tauroursodeoxycholate	14605-22-2	24539842	HMDB0000874		9848818	Neg
100002913	209	57573	212122	Lipid	Secondary Bile Acid Metabolism	3567	NAMED	BHQCQFFYRZLCQQ-QQODLWJBSA-N	C[C@@]12[C@](CCC2[C@H](C)CCC(O)=O)([H])[C@]3([H])[C@@H](O)C[C@]4([H])C[C@H](O)CC[C@]4(C)[C@@]3([H])C[C@@H]1O	ursocholate	ursocholate	2955-27-3		HMDB0000917	C17644	122340	Neg
100002927	400	43378	211502	Amino Acid	Methionine, Cysteine, SAM and Taurine Metabolism	464	NAMED	ZZLHPCSGGOGHFW-UHFFFAOYSA-N	NC(CS(C)=O)C(O)=O	S-methylcysteine sulfoxide	S-methylcysteine sulfoxide	6853-87-8	74136	HMDB0029432		82142	Pos Early
100002945	209	38768	143701	Lipid	Fatty Acid, Branched	1660	NAMED	IIUXHTGBZYEGHI-UHFFFAOYSA-N	CC(CCCCCCCCCCCCCC(O)=O)C	(14 or 15)-methylpalmitate (a17:0 or i17:0)	(14 or 15)-methylpalmitate (a17:0 or i17:0)			HMDB0061859	C16995	8181,17903417	Neg
100002951	209	39831	141952	Lipid	Fatty Acid, Dicarboxylate	1720	NAMED	JJOJFIHJIRWASH-UHFFFAOYSA-N	O=C(O)CCCCCCCCCCCCCCCCCCC(O)=O	eicosanedioate (C20-DC)	eicosanedioate (C20-DC)	2424-92-2	68030			75502	Neg
100002952	209	39837	141956	Lipid	Fatty Acid, Dicarboxylate	1722	NAMED	DGXRZJSPDXZJFG-UHFFFAOYSA-N	O=C(O)CCCCCCCCCCCCCCCCCCCCC(O)=O	docosadioate (C22-DC)	docosadioate (C22-DC)	505-56-6	214170		C14240	7641	Neg
100002953	209	39609	141922	Lipid	Fatty Acid, Monohydroxy	2028	NAMED	UGAGPNKCDRTDHP-UHFFFAOYSA-N	OC(CCCCCCCCCCCCCCCO)=O	16-hydroxypalmitate	16-hydroxypalmitate	506-13-8	10034	HMDB0006294	C18218	10466	Neg
100002989	402	46798	165353	Lipid	Diacylglycerol	2946	NAMED	BLZVZPYMHLXLHG-RQOIEFAZSA-N	CCCCCCCC/C=C\CCCCCCCC(OCC(CO)OC(CCCCCCC/C=C\C/C=C\CCCCC)=O)=O	oleoyl-linoleoyl-glycerol (18:1/18:2) [1]	oleoyl-linoleoyl-glycerol (18:1/18:2) [1]	106292-55-1	23975985	HMDB0007219		14275396	Pos Late
100002990	402	46799	165354	Lipid	Diacylglycerol	2947	NAMED	GREDRAMJRDQWEJ-LTEAFHAISA-N	CCCCCCCC/C=C\CCCCCCCC(OCC(COC(CCCCCCC/C=C\C/C=C\CCCCC)=O)O)=O	oleoyl-linoleoyl-glycerol (18:1/18:2) [2]	oleoyl-linoleoyl-glycerol (18:1/18:2) [2]	104346-53-4	29788004	HMDB0007219		71433693	Pos Late
100003000	402	39270	163991	Lipid	Lysoplasmalogen	2853	NAMED	QYTPGOPLNFESQC-RLHAVTDZSA-N	O=P(OCC[NH3+])([O-])OC[C@H](O)CO/C=C/CCCCCCCCCCCCCC	1-(1-enyl-palmitoyl)-GPE (P-16:0)*	1-(1-enyl-palmitoyl)-GPE (P-16:0)*		10471193	HMDB0011152			Pos Late
100003001	402	39271	180976	Lipid	Lysoplasmalogen	2857	NAMED	KACDZDULGKPXHT-BIHRDVDLSA-N	O=P(OCC[NH3+])([O-])OC[C@H](O)CO/C=C/CCCCCCCCCCCCCCCC	1-(1-enyl-stearoyl)-GPE (P-18:0)*	1-(1-enyl-stearoyl)-GPE (P-18:0)*			HMDB0240598			Pos Late
100003008	209	39223	149867	Lipid	Lysophospholipid	2740	NAMED	GRWOGFDNIAYTPK-DTNGDMSLSA-N	[H]C(C(O)(C(O)([C@](O)1[H])[H])[H])([C@@](OP(O)(O[C@](COC(CCCCCCCCCCCCCCCCC)=O)(CO)[H])=O)([C@]1(O)[H])[H])O	2-stearoyl-GPI (18:0)*	2-stearoyl-GPI (18:0)*			HMDB0061704		131770413	Neg
100003109	209	40479	143013	Xenobiotics	Food Component/Plant	4804	NAMED	ILGMGHZPXRDCCS-UHFFFAOYSA-N	O=C(NC1=C2C=CC=C1)C2CC(O)=O	2-oxindole-3-acetate	2-oxindole-3-acetate	2971-31-5	2338343	HMDB0035514		3080590	Neg
100003119	209	39732	143757	Lipid	Endocannabinoid	2190	NAMED	KOGRJTUIKPMZEJ-KTKRTIGZSA-N	O=C(CCCCCCC/C=C\CCCCCCCC)NCCS(O)(=O)=O	N-oleoyltaurine	N-oleoyltaurine	52514-04-2	4941625			6437033	Neg
100003151	402	46223	159669	Lipid	Fatty Acid Metabolism (Acyl Carnitine, Polyunsaturated)	1909	NAMED	MJLXQSQYKZWZCB-DQFWFXSYSA-N	[O-]C(C[C@H](C[N+](C)(C)C)OC(CCCCCCC/C=C\C/C=C\CCCCC)=O)=O	linoleoylcarnitine (C18:2)*	linoleoylcarnitine (C18:2)*	36816-10-1	4952667	HMDB0006469		6450015	Pos Late
100003152	400	39577	156583	Amino Acid	Glutamate Metabolism	61	NAMED	AOKCDAVWJLOAHG-UHFFFAOYSA-N	CNCCCC(O)=O	N-methyl-GABA	N-methyl-GABA	1119-48-8	63869		C15987	70703	Pos Early
100003210	400	39994	156660	Peptide	Dipeptide	1053	NAMED	XCTHZFGSVQBHBW-UHFFFAOYSA-N	O=C(C(C(C)C)N)NC(CC(C)C)C(O)=O	valylleucine	valylleucine	22906-55-4	312586	HMDB0029131		352039	Pos Early
100003239	209	39835	141954	Lipid	Endocannabinoid	2192	NAMED	LPDJCYFKKSLKRO-UHFFFAOYSA-N	O=C(NCCS(=O)(O)=O)CCCCCCCCCCCCCCC	N-palmitoyltaurine	N-palmitoyltaurine	83982-06-3	14435932			14504290	Neg
100003240	209	39730	143759	Lipid	Endocannabinoid	2191	NAMED	LMIJIHJZVURGQK-UHFFFAOYSA-N	O=C(CCCCCCCCCCCCCCCCC)NCCS(=O)(O)=O	N-stearoyltaurine	N-stearoyltaurine	63155-80-6	147194			168274	Neg
100003258	305	63990	232912	Cofactors and Vitamins	Ascorbate and Aldarate Metabolism	4374	NAMED	RMHBODZVODTFAH-UHFFFAOYSA-N	OC1=C(OC)C(C(C(CO)O)O1)=O	2-O-methylascorbic acid	2-O-methylascorbic acid	17860-87-6	90149	HMDB0240294		54726398	Polar
100003260	400	40007	161438	Amino Acid	Glutamate Metabolism	60	NAMED	SRGQUICKDUQCKO-UHFFFAOYSA-N	O=C(CCCNCCC(O)=O)O	carboxyethyl-GABA	carboxyethyl-GABA	4386-03-2	2474	HMDB0002201		2572	Pos Early
100003365	400	57565	211540	Cofactors and Vitamins	Thiamine Metabolism	4446	NAMED	VUTBELPREDJDDH-UHFFFAOYSA-N	OCC1=CN=C(C)N=C1N	hydroxymethylpyrimidine	hydroxymethylpyrimidine	73-67-6	756		C01279	777	Pos Early
100003397	400	40406	156717	Lipid	Phospholipid Metabolism	2261	NAMED	UYPYRKYUKCHHIB-UHFFFAOYSA-N	C[N+](C)([O-])C	trimethylamine N-oxide	trimethylamine N-oxide	1184-78-7	1113	HMDB0000925	C01104	1145	Pos Early
100003415	400	62860	220638	Amino Acid	Lysine Metabolism	116	NAMED	PQNASZJZHFPQLE-LURJTMIESA-N	O=C([C@H](CCCCNC)N)O	N6-methyllysine	N6-methyllysine	1188-07-4	144469	HMDB0002038	C02728	164795	Pos Early
100003429	209	40478	143877	Xenobiotics	Food Component/Plant	4915	NAMED	UXOJWGSGKUYMIA-UHFFFAOYSA-N	OC1=CC(OC2)=C(C=C1)CC2C3=CC=C(OS(=O)(O)=O)C=C3	equol sulfate	equol sulfate		23936050				Neg
100003434	400	40730	156802	Amino Acid	Histidine Metabolism	82	NAMED	ZCKYOWGFRHAZIQ-UHFFFAOYSA-N	OC(CCC1=CN=CN1)=O	imidazole propionate	imidazole propionate	1074-59-5	63798	HMDB0002271		70630	Pos Early
100003674	400	40703	156791	Peptide	Dipeptide	963	NAMED	RNKSNIBMTUYWSH-YFKPBYRVSA-N	O=[C@]([C@H]1NCCC1)NCC(O)=O	prolylglycine	prolylglycine	2578-57-6	4932143	HMDB0011178		6426709	Pos Early
100003686	209	42092	143937	Lipid	Fatty Acid Metabolism (Acyl Glycine)	1841	NAMED	KVTFEOAKFFQCCX-UHFFFAOYSA-N	O=C(CCCCCCCCCCCCCCC)NCC(O)=O	N-palmitoylglycine	N-palmitoylglycine	2441-41-0	133100	HMDB0013034		151008	Neg
100003695	305	62864	220652	Xenobiotics	Food Component/Plant	4982	NAMED	RGHNJXZEOKUKBD-MBMOQRBOSA-N	O=C([C@H]([C@H]([C@@H]([C@@H](CO)O)O)O)O)O	mannonate*	mannonate*	642-99-9	2496757			3246006	Polar
100003869	209	43588	145259	Lipid	Secondary Bile Acid Metabolism	3550	NAMED	HMXPOCDLAFAFNT-BHYUGXBJSA-N	C[C@@H]([C@H]1CC[C@H]2[C@@H]3C[C@@H]([C@@H]4C[C@@H](CC[C@@]4([C@H]3CC[C@]12C)C)O)O)CCC(NCCS(=O)(O)=O)=O	taurohyodeoxycholic acid	taurohyodeoxycholic acid	38411-85-7	106373	HMDB0000874		12443252	Neg
100003892	400	42002	156875	Amino Acid	Methionine, Cysteine, SAM and Taurine Metabolism	472	NAMED	DWPCPZJAHOETAG-IMJSIDKUSA-N	O=C([C@H](CSC[C@@H](C(O)=O)N)N)O	lanthionine	lanthionine	3183-08-2	88959			98504	Pos Early
100003895	209	41948	151109	Xenobiotics	Food Component/Plant	4914	NAMED	XDPLKWRSVXUQBN-WKXGUSGUSA-N	OC1=CC=C(C2CC3=C(C=C(C=C3)O[C@H]4[C@@H](O)[C@@H](O)[C@H](O)C(C(O)=O)O4)OC2)C=C1	equol glucuronide	equol glucuronide					46781484	Neg
100003901	209	41220	142786	Lipid	Lysophospholipid	2688	NAMED	KIHAGWUUUHJRMS-JOCHJYFZSA-N	OC[C@@H](OC(CCCCCCCCCCCCCCCCC)=O)COP(OCC[NH3+])([O-])=O	2-stearoyl-GPE (18:0)*	2-stearoyl-GPE (18:0)*		24769218	HMDB0011129		90658453,53480667	Neg
100003926	400	43264	156990	Lipid	Fatty Acid Metabolism (Acyl Carnitine, Hydroxy)	1937	NAMED	UEFRDQSMQXDWTO-UHFFFAOYSA-N	CC(CC(OC(C[N+](C)(C)C)CC([O-])=O)=O)O	(R)-3-hydroxybutyrylcarnitine	(R)-3-hydroxybutyrylcarnitine			HMDB0013127		53481617	Pos Early
100003940	209	43502	144003	Lipid	Fatty Acid Metabolism (Acyl Glycine)	1835	NAMED	SAVLIIGUQOSOEP-UHFFFAOYSA-N	O=C(CCCCCCC)NCC(O)=O	N-octanoylglycine	N-octanoylglycine	14246-53-8	76040	HMDB0000832		84290	Neg
100004046	209	43488	144001	Amino Acid	Histidine Metabolism	88	NAMED	BKAYIFDRRZZKNF-VIFPVBQESA-N	OC([C@H](CC1=CN=CN1)NC(CCNC(C)=O)=O)=O	N-acetylcarnosine	N-acetylcarnosine	56353-15-2	8079136	HMDB0012881		9903482	Neg
100004054	402	57512	211213	Lipid	Fatty Acid Metabolism (Acyl Carnitine, Long Chain Saturated)	1883	NAMED	DWSFAVOTORHAAL-UHFFFAOYSA-N	[O-]C(CC(C[N+](C)(C)C)OC(CCCCCCCCCCCCCCCC)=O)=O	margaroylcarnitine (C17)*	margaroylcarnitine (C17)*	106182-29-0	35015987	HMDB0006210		53477803	Pos Late
100004059	400	62278	219251	Xenobiotics	Food Component/Plant	4954	NAMED	GPPYTCRVKHULJH-UHFFFAOYSA-N	C[N+](C)(C(C([O-])=O)CC1=CN=CN1)C	histidine betaine (hercynine)*	histidine betaine (hercynine)*	534-30-5	2340795	HMDB0029422		3083620	Pos Early
100004064	209	42605	143957	Lipid	Primary Bile Acid Metabolism	3486	NAMED	XSOLDPYUICCHJX-PTKAHPSKSA-N	O[C@H]1C(C2[C@](CC[C@H]3O)(C)C(C3)[C@@H]1O)C4[C@@](CC2)(C)C(C(C)CCC(NCCS(O)(=O)=O)=O)CC4	tauro-alpha-muricholate	tauro-alpha-muricholate			HMDB0000932		101657566	Neg
100004088	402	40807	159350	Cofactors and Vitamins	Vitamin A Metabolism	4459	NAMED	NCYCYZXNIZJOKI-OVSJKPMPSA-N	O=C([H])/C=C(C)/C=C/C=C(C)/C=C/C1=C(C)CCCC1(C)C	retinal	retinal		553582	HMDB0001358	C00376	638015	Pos Late
100004089	209	42489	144357	Lipid	Fatty Acid, Monohydroxy	1980	NAMED	GHPVDCPCKSNJDR-UHFFFAOYSA-N	OC(C(O)=O)CCCCCCCC	2-hydroxydecanoate	2-hydroxydecanoate	5393-81-7	20195	HMDB0094656		21488	Neg
100004111	209	46146	144253	Xenobiotics	Benzoate Metabolism	4528	NAMED	NCOMUGOPQPRVSE-UHFFFAOYSA-N	OC1=CC(C)=CC=C1OS(O)(=O)=O	4-methylcatechol sulfate	4-methylcatechol sulfate			HMDB0240459		54104170	Neg
100004112	209	46165	144278	Xenobiotics	Benzoate Metabolism	4525	NAMED	HFDKYCXWNHNKAF-UHFFFAOYSA-N	OC1=C(C)C=CC=C1OS(O)(=O)=O	3-methyl catechol sulfate (1)	3-methyl catechol sulfate (1)					118431379	Neg
100004195	209	42629	154216	Lipid	Fatty Acid Metabolism (Acyl Glycine)	1830	NAMED	RNFCYFVPNIXAHP-UHFFFAOYSA-N	O=C(O)CNC(CCCCCC)=O	heptanoyl glycine	heptanoyl glycine	23783-23-5	9107408	HMDB0013010		10932172	Neg
100004208	209	46111	143736	Xenobiotics	Benzoate Metabolism	4524	NAMED	AQTYXAPIHMXAAV-UHFFFAOYSA-N	COC1=C(OS(O)(=O)=O)C=CC=C1	guaiacol sulfate	guaiacol sulfate		21078	HMDB0060013		22473	Neg
100004227	402	43343	159548	Lipid	Fatty Acid, Amino	1773	NAMED	AKVBCGQVQXPRLD-UHFFFAOYSA-N	CCCCCCC(C(O)=O)N	2-aminooctanoate	2-aminooctanoate	644-90-6	62727	HMDB0000991		69522	Pos Late
100004262	209	43027	143977	Lipid	Fatty Acid, Dicarboxylate	1703	NAMED	DXNCZXXFRKPEPY-UHFFFAOYSA-N	OC(CCCCCCCCCCCC(O)=O)=O	tridecanedioate (C13-DC)	tridecanedioate (C13-DC)	505-52-2	10026	HMDB0002327		10458	Neg
100004284	400	43424	157011	Xenobiotics	Chemical	6184	NAMED	HHVIBTZHLRERCL-UHFFFAOYSA-N	CS(C)(=O)=O	dimethyl sulfone	dimethyl sulfone	67-71-0	5978	HMDB0004983	C11142	6213	Pos Early
100004299	400	43255	156987	Amino Acid	Histidine Metabolism	78	NAMED	GVRCKHXHWSYDEF-UHFFFAOYSA-N	OC(C(CC1=CN(C)C=N1)NC(C)=O)=O	N-acetyl-1-methylhistidine*	N-acetyl-1-methylhistidine*			HMDB0240340		53859791	Pos Early
100004318	400	43374	157003	Xenobiotics	Food Component/Plant	4961	NAMED	JYGFTBXVXVMTGB-UHFFFAOYSA-N	O=C1CC2=C(N1)C=CC=C2	indolin-2-one	indolin-2-one	59-48-3	284794		C12312	321710	Pos Early
100004322	209	43266	143737	Xenobiotics	Food Component/Plant	5274	NAMED	VSTZVCJQGSLNLL-UHFFFAOYSA-N	NC1=CC=CC=C1OS(O)(=O)=O	2-aminophenol sulfate	2-aminophenol sulfate		158022	HMDB0061116		181670	Neg
100004326	209	48693	207571	Xenobiotics	Chemical	6139	NAMED	CGFRVKXGZRODPA-UHFFFAOYSA-N	CC(C1=CC=CC(OS(=O)(O)=O)=C1)=O	3-acetylphenol sulfate	3-acetylphenol sulfate		16230535				Neg
100004328	402	42463	164531	Lipid	Sphingomyelins	3134	NAMED	KYICBZWZQPCUMO-PSALXKTOSA-N	CCCCCCCCCCCCCC(N[C@@](COP([O-])(OCC[N+](C)(C)C)=O)([C@](O)(/C=C/CCCCCCCCCCCCC)[H])[H])=O	sphingomyelin (d18:1/14:0, d16:1/16:0)*	sphingomyelin (d18:1/14:0, d16:1/16:0)*		9608732	HMDB0012097		11433862	Pos Late
100004329	402	42459	161023	Lipid	Sphingomyelins	3138	NAMED	IWHLTJGDYLJQSH-FLPFCPAFSA-N	CCCCC/C=C/CCCCCCCCC(N[C@@](COP([O-])(OCC[N+](C)(C)C)=O)([C@](O)(/C=C/CCCCCCCCCCCCC)[H])[H])=O	sphingomyelin (d18:2/16:0, d18:1/16:1)*	sphingomyelin (d18:2/16:0, d18:1/16:1)*			HMDB0240638,HMDB0240613			Pos Late
100004396	305	62069	218878	Lipid	Fatty Acid, Dicarboxylate	1686	NAMED	YVOMYDHIQVMMTA-UHFFFAOYSA-N	OC(CC(O)=O)CCC(O)=O	3-hydroxyadipate	3-hydroxyadipate		133894	HMDB0000345		151913	Polar
100004442	305	46325	165176	Lipid	Lysophospholipid	2610	NAMED	XBFQFMCUPHZKTI-DOFZRALJSA-N	CCCCC\C=C/C/C=C\C/C=C\C/C=C\CCCC(OCC(O)COP(O)(O)=O)=O	1-arachidonoyl-GPA (20:4)	1-arachidonoyl-GPA (20:4)	799268-65-8		HMDB0062312		42607498	Polar
100004488	400	43586	157041	Amino Acid	Urea cycle; Arginine and Proline Metabolism	528	NAMED	NTNWOCRCBQPEKQ-YFKPBYRVSA-N	OC([C@H](CCCN([H])/C(N([H])[H])=N/C)N([H])[H])=O	N-monomethylarginine	N-monomethylarginine	53308-83-1	117259	HMDB0029416	C03884	132862	Pos Early
100004499	209	43231	143979	Amino Acid	Lysine Metabolism	135	NAMED	FZXCPFJMYOQZCA-UHFFFAOYSA-N	OC(C1CCCC(N1)=O)=O	6-oxopiperidine-2-carboxylate	6-oxopiperidine-2-carboxylate	34622-39-4	2282737	HMDB0061705		3014237	Neg
100004523	209	43249	124707	Amino Acid	Urea cycle; Arginine and Proline Metabolism	515	NAMED	SRXKAYJJGAAOBP-UHFFFAOYSA-N	CC(NCCCC(N)C(O)=O)=O	N-delta-acetylornithine	N-delta-acetylornithine		8096135	HMDB0003357	C00437	9920500	Neg
100004542	400	43761	157045	Lipid	Fatty Acid, Amino	1768	NAMED	RDFMDVXONNIGBC-UHFFFAOYSA-N	OC(C(CCCCC)N([H])[H])=O	2-aminoheptanoate	2-aminoheptanoate	1115-90-8	198338	HMDB0094649		227939	Pos Early
100004555	400	43265	156991	Xenobiotics	Chemical	6221	NAMED	AWUHAZDZHNWQAG-UHFFFAOYSA-N	O=C(C1=CC=CC=C1)OC(C[N+](C)(C)C)CC([O-])=O	benzoylcarnitine*	benzoylcarnitine*	105450-08-6	28689447				Pos Early
100004561	305	43549	211420	Amino Acid	Tryptophan Metabolism	279	NAMED	LLLPDUXGHXIXIW-UHFFFAOYSA-N	OC(C1=CC=CC=C1N([H])C=O)=O	N-formylanthranilic acid	N-formylanthranilic acid	3342-77-6	91624	HMDB0004089	C05653	101399	Polar
100004568	209	44552	144009	Xenobiotics	Chemical	6170	NAMED	FMWPQZPFBAHHMB-UHFFFAOYSA-N	OC(C(CSCCCO)NC(C)=O)=O	S-(3-hydroxypropyl)mercapturic acid (HPMA)	S-(3-hydroxypropyl)mercapturic acid (HPMA)	23127-40-4	2616726			119083	Neg
100004575	209	43591	153118	Amino Acid	Urea cycle; Arginine and Proline Metabolism	517	NAMED	XUYANFPPYJSBPU-UHFFFAOYSA-N	OC(C(CCCNC(C)=O)N([H])C(C)=O)=O	N2,N5-diacetylornithine	N2,N5-diacetylornithine	39825-23-5	8573834	HMDB0240345		65977	Neg
100004601	209	57783	213695	Xenobiotics	Bacterial/Fungal	5352	NAMED	KNSAWRXCIVESQC-UHFFFAOYSA-N	O=C(O)CC1=C2C(C=CN2)=CC=C1	1H-indole-7-acetic acid	1H-indole-7-acetic acid	39689-63-9	13535457			18356439	Neg
100004635	400	44878	157087	Amino Acid	Methionine, Cysteine, SAM and Taurine Metabolism	445	NAMED	UCUNFLYVYCGDHP-UHFFFAOYSA-N	O=S(C)(CCC(N)C(O)=O)=O	methionine sulfone	methionine sulfone	820-10-0	63154	HMDB0062174		69961	Pos Early
100005350	402	45951	159653	Lipid	Lysophospholipid	2636	NAMED	WKQNRCYKYCKESD-YHTMAJSVSA-N	C[N+](CCOP(OCC(O)COC(CCCCCCC/C=C/C/C=C/C/C=C/CC)=O)([O-])=O)(C)C	1-linolenoyl-GPC (18:3)*	1-linolenoyl-GPC (18:3)*			HMDB0010388	C04100		Pos Late
100005351	402	44563	159609	Lipid	Lysophospholipid	2654	NAMED	PDIGSOAOQOXRDU-GUTOPQIJSA-N	C[N+](CCOP(OCC(O)COC(CCC/C=C/C/C=C/C/C=C/C/C=C/C/C=C/CC)=O)([O-])=O)(C)C	1-eicosapentaenoyl-GPC (20:5)*	1-eicosapentaenoyl-GPC (20:5)*			HMDB0010397			Pos Late
100005352	402	44560	159608	Lipid	Lysophospholipid	2645	NAMED	YYSFWGQAKJTHRE-OUKQBFOZSA-N	C[N+](CCOP(OCC(O)COC(CCCCCCCCC/C=C/CCCCCCCC)=O)([O-])=O)(C)C	1-eicosenoyl-GPC (20:1)*	1-eicosenoyl-GPC (20:1)*			HMDB0010391		52924051	Pos Late
100005372	402	44621	163990	Lipid	Lysoplasmalogen	2855	NAMED	URGVIWXYPWWBQO-ZCJATDNESA-N	O=P(OCC[NH3+])([O-])OC[C@H](O)CO/C=C/CCCCCC/C=C/CCCCCCCC	1-(1-enyl-oleoyl)-GPE (P-18:1)*	1-(1-enyl-oleoyl)-GPE (P-18:1)*						Pos Late
100005373	400	46227	221883	Amino Acid	Lysine Metabolism	123	NAMED	BFSYFTQDGRDJNV-QCNRFFRDSA-N	OC[C@@H](O)[C@@H](O)[C@H](O)C(CNCCCC[C@@H](N)C(O)=O)=O	fructosyllysine	fructosyllysine	21291-40-7	110281	HMDB0034879		9839580	Pos Early
100005383	400	47101	157354	Xenobiotics	Bacterial/Fungal	5353	NAMED	BPSLZWSRHTULGU-ZCFIWIBFSA-N	CN1[C@@H](C(O)=O)CCCC1	N-methylpipecolate	N-methylpipecolate	41447-17-0	9461516			11286529	Pos Early
100005384	209	45413	143779	Xenobiotics	Chemical	6121	NAMED	CIQHWLTYGMYQQR-QMMMGPOBSA-N	OS(OC1=CC=C(C[C@H](N)C(O)=O)C=C1)(=O)=O	O-sulfo-tyrosine	O-sulfo-tyrosine		448617	HMDB0155722		514186	Neg
100005389	209	47114	149387	Xenobiotics	Food Component/Plant	4924	NAMED	PZPATWACAAOHTJ-HWKANZROSA-N	COC1=C(OS(O)(=O)=O)C=CC(/C=C/C(O)=O)=C1	ferulic acid 4-sulfate	ferulic acid 4-sulfate	86321-29-1	4878542	HMDB0029200		6305574	Neg
100005391	209	45415	153117	Xenobiotics	Benzoate Metabolism	4591	NAMED	IQWLPDPKVFZEOK-UHFFFAOYSA-N	OS(OC1=CC=CC(CCC(O)=O)=C1)(=O)=O	3-(3-hydroxyphenyl)propionate sulfate	3-(3-hydroxyphenyl)propionate sulfate	86321-32-6	162993	HMDB0094710		187488	Neg
100005463	400	45428	157095	Amino Acid	Methionine, Cysteine, SAM and Taurine Metabolism	447	NAMED	NPIMMZJBURSMON-UHFFFAOYSA-N	OC(C(CCS(C)=O)NC(C)=O)=O	N-acetylmethionine sulfoxide	N-acetylmethionine sulfoxide	108646-71-5	167798			11902949	Pos Early
100005466	209	48187	153116	Amino Acid	Methionine, Cysteine, SAM and Taurine Metabolism	479	NAMED	CXJAAWRLVGAKDV-UHFFFAOYSA-N	O=S(CCNC(C)=O)(O)=O	N-acetyltaurine	N-acetyltaurine		140553	HMDB0240253		159864	Neg
100005716	209	45968	144192	Lipid	Lysophospholipid	2731	NAMED	FQQQKGAFQIIGLQ-VYFUBJQISA-N	O[C@H](COC(CCCCCCC/C=C\CCCCCCCC)=O)COP(OCC(O)CO)(O)=O	1-oleoyl-GPG (18:1)*	1-oleoyl-GPG (18:1)*		34999689	HMDB0240602			Neg
100005717	209	45970	144193	Lipid	Lysophospholipid	2726	NAMED	BVJSKAUUFXBDOB-UHFFFAOYSA-N	O=P(OCC(O)CO)(O)OCC(O)COC(CCCCCCCCCCCCCCC)=O	1-palmitoyl-GPG (16:0)*	1-palmitoyl-GPG (16:0)*		2548639	HMDB0240601		3300276	Neg
100005814	209	61826	218246	Lipid	Endocannabinoid	2195	NAMED	YIWODQVLEDDQSF-HZJYTTRNSA-N	CCCCC/C=C\C/C=C\CCCCCCCC(NCCS(=O)(O)=O)=O	N-linoleoyltaurine*	N-linoleoyltaurine*					52922081	Neg
100005829	209	61825	218245	Lipid	Endocannabinoid	2188	NAMED	XPZFMHCHEWYIGE-UHFFFAOYSA-N	CCCCCCCCCCCCCC(NCCS(=O)(O)=O)=O	N-myristoyltaurine*	N-myristoyltaurine*		3037686			3810823	Neg
100005831	209	61824	218244	Lipid	Endocannabinoid	2194	NAMED	QNBGIJHCIVKQEX-FPLPWBNLSA-N	O=C(NCCS(=O)(O)=O)CCCCCCC/C=C\CCCCCC	N-palmitoleoyltaurine*	N-palmitoleoyltaurine*						Neg
100005864	400	46144	157118	Xenobiotics	Food Component/Plant	5114	NAMED	HOVAGTYPODGVJG-ZFYZTMLRSA-N	O[C@H]1[C@@H]([C@H]([C@H](O[C@@H]1CO)OC)O)O	methyl glucopyranoside (alpha + beta)	methyl glucopyranoside (alpha + beta)			HMDB0029965		445238,3036743,2108	Pos Early
100005946	305	48141	160468	Xenobiotics	Food Component/Plant	5153	NAMED	WPAMZTWLKIDIOP-WVZVXSGGSA-N	OC[C@@H](O)[C@@H](O)CC(C(O)=O)=O	2-keto-3-deoxy-gluconate	2-keto-3-deoxy-gluconate	17510-99-5	141630	HMDB0001353	C00204	161227	Polar
100005985	402	47154	164532	Lipid	Sphingomyelins	3135	NAMED	SOWIKWJDPCEPOJ-IOBWIPHESA-N	CCCC/C=C/CCCCCCCC(N[C@@](COP([O-])(OCC[N+](C)(C)C)=O)([C@](O)(/C=C/CCCCCCCCCCCCC)[H])[H])=O	sphingomyelin (d18:2/14:0, d18:1/14:1)*	sphingomyelin (d18:2/14:0, d18:1/14:1)*			HMDB0240637,HMDB0240612			Pos Late
100005986	402	47153	164529	Lipid	Sphingomyelins	3150	NAMED	WKZHECFHXLTOLJ-QYKFWSDSSA-N	O[C@H](/C=C/CCCCCCCCCCCCC)[C@H](CO[P](OCC[N+](C)(C)C)([O-])=O)NC(CCCCCCCCCCCCC/C=C\CCCCCCCC)=O	sphingomyelin (d18:1/24:1, d18:2/24:0)*	sphingomyelin (d18:1/24:1, d18:2/24:0)*	94359-13-4	24846874	HMDB0012107		44260126	Pos Late
100005996	402	61865	218582	Lipid	Fatty Acid Metabolism (Acyl Carnitine, Dicarboxylate)	1936	NAMED	CYPBWZKNUDFJJE-PLNGDYQASA-N	O=C(CCCCCCC/C=C\CCCCCCCC(O)=O)OC(CC([O-])=O)C[N+](C)(C)C	octadecenedioylcarnitine (C18:1-DC)*	octadecenedioylcarnitine (C18:1-DC)*	251981-06-3	28639201				Pos Late
100005998	402	61867	218585	Lipid	Fatty Acid Metabolism (Acyl Carnitine, Dicarboxylate)	1935	NAMED	ULCCGBCYWCYNIC-UHFFFAOYSA-N	O=C(CCCCCCCCCCCCCCCCC(O)=O)OC(CC([O-])=O)C[N+](C)(C)C	octadecanedioylcarnitine (C18-DC)*	octadecanedioylcarnitine (C18-DC)*	123233-50-1	28639203				Pos Late
100005999	402	47890	160235	Lipid	Sterol	3262	NAMED	OYXZMSRRJOYLLO-ADVCKMRSSA-N	C[C@]12C(C[C@@H](O)CC2)=CC(O)C3C1CC[C@@]4(C)C3CC[C@@H]4[C@@H](CCCC(C)C)C	7-hydroxycholesterol (alpha or beta)	7-hydroxycholesterol (alpha or beta)			HMDB0006119	C15610	15571093	Pos Late
100006051	402	48182	160274	Lipid	Fatty Acid Metabolism (Acyl Carnitine, Monounsaturated)	1902	NAMED	ABVVZYXTZLEOHP-OLHLWXQYSA-N	O=C(CCCCCCC/C=C\CCCC)O[C@H](CC([O-])=O)C[N+](C)(C)C	myristoleoylcarnitine (C14:1)*	myristoleoylcarnitine (C14:1)*	889848-55-9	34999520	HMDB0240588		129691961	Pos Late
100006056	209	48433	155077	Amino Acid	Tyrosine Metabolism	232	NAMED	NSTPXGARCQOSAU-VIFPVBQESA-N	OC([C@@H](NC=O)CC1=CC=CC=C1)=O	N-formylphenylalanine	N-formylphenylalanine	13200-85-6	663938	HMDB0240317		759256,7064571	Neg
100006098	209	48448	155087	Xenobiotics	Chemical	6253	NAMED	BDERIBJTVYFANV-UHFFFAOYSA-N	O=S(OC1=CC=CN=C1)(O)=O	3-hydroxypyridine sulfate	3-hydroxypyridine sulfate	1955-23-3	16232314				Neg
100006106	209	48696	222424	Xenobiotics	Food Component/Plant	4652	NAMED	PVWYGTJERKKPRW-UHFFFAOYSA-N	O=C1C=COC(C)=C1OS(=O)(O)=O	maltol sulfate	maltol sulfate						Neg
100006115	305	48255	153226	Carbohydrate	Pentose Metabolism	1300	NAMED	QXKAIJAYHKCRRA-JJYYJPOSSA-N	OC([C@H]([C@@H]([C@@H](CO)O)O)O)=O	arabonate/xylonate	arabonate/xylonate			HMDB0000539	C00502,C05411	122045,6602431	Polar
100006120	209	48438	165701	Xenobiotics	Food Component/Plant	5151	NAMED	KHSGXBFYCSMNPA-UHFFFAOYSA-N	O=C(O)C(NC(C)=O)CCCCN1C(C=O)=CC=C1CO	N-acetylpyrraline	N-acetylpyrraline				C01227		Neg
100006121	209	48341	153390	Lipid	Monoacylglycerol	2881	NAMED	LERKRWCYZNDWFH-QNEBEIHSSA-N	OCC(O)COC(CCCCCC/C=C\C/C=C\C/C=C\CCCCC)=O	1-dihomo-linolenylglycerol (20:3)	1-dihomo-linolenylglycerol (20:3)			HMDB0011577			Neg
100006122	305	48340	153389	Carbohydrate	Pentose Metabolism	1281	NAMED	LQXVFWRQNMEDEE-UHFFFAOYSA-N	OC1(CO)OCC(O)C1O	ribulose/xylulose	ribulose/xylulose			HMDB0000621,HMDB0000751,HMDB0001644,HMDB0003371		5289590,151261	Polar
100006124	209	48455	155093	Amino Acid	Lysine Metabolism	113	NAMED	ZHZUEHHBTYJTKY-UHFFFAOYSA-N	CC(NCCCCC(NC(C)=O)C(O)=O)=O	N2,N6-diacetyllysine	N2,N6-diacetyllysine	499-86-5	82921			91827	Neg
100006129	209	54910	208290	Amino Acid	Tyrosine Metabolism	206	NAMED	SVYIZYRTOYHQRE-UHFFFAOYSA-N	OC1=C(OC)C=C(CC(C(O)=O)O)C=C1	vanillactate	vanillactate	2475-56-1	141152	HMDB0000913		160637	Neg
100006190	209	48580	155103	Xenobiotics	Food Component/Plant	5273	NAMED	JCVGTUVGDOWZJE-UHFFFAOYSA-N	CC(NC(C=CC=C1)=C1OS(=O)(O)=O)=O	2-acetamidophenol sulfate	2-acetamidophenol sulfate	40712-60-5	158023			181671	Neg
100006191	209	48841	155015	Amino Acid	Tyrosine Metabolism	230	NAMED	JPAUCQAJHLSMQW-XPORZQOISA-N	O[C@H]([C@@H](O)[C@@H]1O)[C@@H](O[C@@H]1C(O)=O)OC2=CC=C(C)C=C2	p-cresol glucuronide*	p-cresol glucuronide*	17680-99-8	135751	HMDB0011686		154035	Neg
100006260	209	48698	166006	Xenobiotics	Chemical	6267	NAMED	QRHHXPIYYXPEMG-UHFFFAOYSA-N	O=S(OC1=CC=C2C=CNC2=C1)(O)=O	6-hydroxyindole sulfate	6-hydroxyindole sulfate			HMDB0000682		122198196	Neg
100006262	209	48457	219302	Amino Acid	Tyrosine Metabolism	198	NAMED	IGTMFIJOUADBDC-UHFFFAOYSA-N	COC1=CC=C(OS(=O)(O)=O)C=C1	4-methoxyphenol sulfate	4-methoxyphenol sulfate	3233-60-1					Neg
100006290	402	48490	164042	Lipid	Sphingomyelins	3142	NAMED	AADLTHQNYQJHQV-SVLGDMRNSA-N	CCCCCCCCCCCCC/C=C/[C@@H](O)[C@@H](NC(CCCCCCCCCCCCCCCCCCC)=O)COP([O-])(OCC[N+](C)(C)C)=O	sphingomyelin (d18:1/20:0, d16:1/22:0)*	sphingomyelin (d18:1/20:0, d16:1/22:0)*		23113477	HMDB0012102		44260124	Pos Late
100006292	402	48491	164534	Lipid	Sphingomyelins	3143	NAMED	MDRFMTLYKHBJTF-YECRPIIFSA-N	CCCCCCCCCCCCC/C=C/[C@@H](O)[C@@H](NC(CCCCCCCCC/C=C/CCCCCCCC)=O)COP([O-])(OCC[N+](C)(C)C)=O	sphingomyelin (d18:1/20:1, d18:2/20:0)*	sphingomyelin (d18:1/20:1, d18:2/20:0)*	222403-67-0		HMDB0240610,HMDB0240632			Pos Late
100006294	402	48492	164533	Lipid	Sphingomyelins	3127	NAMED	FJJANLYCZUNFSE-TWKUQIQBSA-N	CCCCCCCCCCCCC/C=C/[C@@H](O)[C@@H](NC(CCCCCCCCCCCCCCCCCCCCC)=O)COP([O-])(OCC[N+](C)(C)C)=O	behenoyl sphingomyelin (d18:1/22:0)*	behenoyl sphingomyelin (d18:1/22:0)*		24846873	HMDB0012103		44260125	Pos Late
100006295	402	48493	164535	Lipid	Sphingomyelins	3147	NAMED	VBFKEZGCUWHGSK-ADSSWVSQSA-N	CCCCCCCCCCCCC/C=C/[C@@H](O)[C@@H](NC(CCCCCCCCCCC/C=C\CCCCCCCC)=O)COP([O-])(OCC[N+](C)(C)C)=O	sphingomyelin (d18:1/22:1, d18:2/22:0, d16:1/24:1)*	sphingomyelin (d18:1/22:1, d18:2/22:0, d16:1/24:1)*		29368329	HMDB0012104			Pos Late
100006296	402	57477	211140	Lipid	Sphingomyelins	3148	NAMED	BBJBWENPFZYXKM-CUYAXJSGSA-N	CCCCCCCCCCCCC/C=C/[C@@H](O)[C@@H](NC(CCCCCCCCCCC/C=C/C/C=C/CCCCC)=O)COP([O-])(OCC[N+](C)(C)C)=O	sphingomyelin (d18:1/22:2, d18:2/22:1, d16:1/24:2)*	sphingomyelin (d18:1/22:2, d18:2/22:1, d16:1/24:2)*			HMDB0240670,HMDB0240672,HMDB0240669			Pos Late
100006298	402	57330	210828	Lipid	Sphingomyelins	3129	NAMED	QEDPUVGSSDPBMD-XTAIVQBESA-N	CCCCCCCCCCCCC/C=C/[C@@H](O)[C@@H](NC(CCCCCCCCCCCCCCCCCCCCCCC)=O)COP([O-])(OCC[N+](C)(C)C)=O	lignoceroyl sphingomyelin (d18:1/24:0)	lignoceroyl sphingomyelin (d18:1/24:0)	60037-60-7	24846875	HMDB0011697			Pos Late
100006314	402	52433	164557	Lipid	Sphingomyelins	3136	NAMED	LQINJRUGTUOHGS-YPDYIYJKSA-N	CCCCCCCCCCCCC/C=C/[C@@H](O)[C@@H](NC(CCCCCCCCCCCCCC)=O)COP([O-])(OCC[N+](C)(C)C)=O	sphingomyelin (d17:1/16:0, d18:1/15:0, d16:1/17:0)*	sphingomyelin (d17:1/16:0, d18:1/15:0, d16:1/17:0)*	121999-58-4	28532779	HMDB0240617,HMDB0240608			Pos Late
100006362	209	48727	155109	Xenobiotics	Food Component/Plant	5152	NAMED	CQRHJEVIKOKQMO-UHFFFAOYSA-N	OC1=CC2=C(C=C1)C(C(C3=CC=C(C=C3)OS(=O)(O)=O)=CO2)=O	daidzein sulfate (1)	daidzein sulfate (1)					12114465	Neg
100006363	209	48728	155111	Xenobiotics	Food Component/Plant	5144	NAMED	CQRHJEVIKOKQMO-UHFFFAOYSA-N	OC1=CC2=C(C(C(C3=CC=C(OS(=O)(O)=O)C=C3)=CO2)=O)C=C1	daidzein sulfate (2)	daidzein sulfate (2)					12114465	Neg
100006367	209	53230	179135	Lipid	Fatty Acid, Monohydroxy	1997	NAMED	HPMGFDVTYHWBAG-UHFFFAOYSA-N	CCCC(O)CC(O)=O	3-hydroxyhexanoate	3-hydroxyhexanoate	10191-24-9	133518	HMDB0061652,HMDB0010718		151492	Neg
100006370	209	54805	207701	Lipid	Sterol	3230	NAMED	WVXOMPRLWLXFAP-AMQKJUDNSA-N	C[C@@H]([C@H]1CC[C@@H]2[C@]1(C)CC[C@H]3[C@H]2CC=C4[C@]3(C)CC[C@H](O)C4)CCCC(C(O)=O)C	3beta-hydroxy-5-cholestenoate	3beta-hydroxy-5-cholestenoate	6561-58-6		HMDB0012453	C17333	165511	Neg
100006374	209	48762	155125	Xenobiotics	Chemical	6250	NAMED	NGVLEQPKHLWZLN-UHFFFAOYSA-N	OC1=C(O)C(OS(=O)(O)=O)=CC=C1	1,2,3-benzenetriol sulfate (2)	1,2,3-benzenetriol sulfate (2)			HMDB0060018,HMDB0060016		92013662,54110629	Neg
100006375	209	48763	155127	Xenobiotics	Benzoate Metabolism	4564	NAMED	NTXOJWKIHIOUQN-UHFFFAOYSA-N	OC1=C(C=CC=C1OS(=O)(O)=O)OC	3-methoxycatechol sulfate (1)	3-methoxycatechol sulfate (1)					129892430	Neg
100006376	209	48752	155119	Xenobiotics	Benzoate Metabolism	4565	NAMED	NTXOJWKIHIOUQN-UHFFFAOYSA-N	OC1=C(OC)C=CC=C1OS(=O)(O)=O	3-methoxycatechol sulfate (2)	3-methoxycatechol sulfate (2)						Neg
100006378	209	48757	155121	Amino Acid	Tryptophan Metabolism	275	NAMED	PPIMFXHQDQRWGJ-JTQLQIEISA-N	OC([C@@H](NC(C)=O)CC(C1=CC=CC=C1N)=O)=O	N-acetylkynurenine (2)	N-acetylkynurenine (2)			HMDB0240342		73817779	Neg
100006379	209	48782	155139	Amino Acid	Tryptophan Metabolism	266	NAMED	CPXSBHKDEPPWIX-RAYCSJGISA-N	N[C@H](C(O)=O)CC1=C([C@H]([C@H]([C@@H](O)[C@@H]2O)O)O[C@@H]2CO)NC3=CC=CC=C13	C-glycosyltryptophan	C-glycosyltryptophan	180509-18-6	9157171	HMDB0240296		10981970	Neg
100006430	305	48885	160479	Carbohydrate	Pentose Metabolism	1294	NAMED	HEBKCHPVOIAQTA-IMJSIDKUSA-N	OC[C@@H](C([C@H](CO)O)O)O	arabitol/xylitol	arabitol/xylitol			HMDB0001851,HMDB0000568,HMDB0002917	C00379,C00542,C01904	94154,6912	Polar
100006435	400	46539	166536	Carbohydrate	Aminosugar Metabolism	1451	NAMED	OVRNDRQMDRJTHS-FMDGEEDCSA-N	O[C@@H]1[C@H]([C@@H](O[C@@H]([C@H]1O)CO)O)NC(C)=O	N-acetylglucosamine/N-acetylgalactosamine	N-acetylglucosamine/N-acetylgalactosamine			HMDB0000212,HMDB0000215	C01074	439174,84265	Pos Early
100006438	305	47076	148336	Energy	TCA Cycle	1480	NAMED	HNEGQIOMVPPMNR-IHWYPQMZSA-N	C/C(C(O)=O)=C/C(O)=O	citraconate/glutaconate	citraconate/glutaconate			HMDB0000634,HMDB0000620	C02226,C02214	5280498,643798	Polar
100006614	400	52988	166228	Lipid	Fatty Acid Metabolism (Acyl Carnitine, Dicarboxylate)	1925	NAMED	BSVHAXJKBCWVDA-UHFFFAOYSA-N	[O-]C(CC(OC(CCCCC(O)=O)=O)C[N+](C)(C)C)=O	adipoylcarnitine (C6-DC)	adipoylcarnitine (C6-DC)		28540385	HMDB0061677		71296139	Pos Early
100006620	402	61775	218145	Lipid	Fatty Acid Metabolism (Acyl Carnitine, Medium Chain)	1875	NAMED	MPSPNFAQQQMFLK-UHFFFAOYSA-N	[O-]C(CC(OC(CCCCCCCC)=O)C[N+](C)(C)C)=O	nonanoylcarnitine (C9)	nonanoylcarnitine (C9)		28533402	HMDB0013288		91825642	Pos Late
100006627	400	52990	166232	Lipid	Fatty Acid Metabolism (Acyl Carnitine, Dicarboxylate)	1933	NAMED	YVWVEIPYMGBQPE-UHFFFAOYSA-N	[O-]C(CC(OC(CCCCCCC(O)=O)=O)C[N+](C)(C)C)=O	suberoylcarnitine (C8-DC)	suberoylcarnitine (C8-DC)						Pos Early
100006633	209	53027	166150	Amino Acid	Tyrosine Metabolism	237	NAMED	IIODELUADFSHIZ-UHFFFAOYSA-N	OS(OC(C=C1)=CC=C1CC(O)=O)(=O)=O	4-hydroxyphenylacetate sulfate	4-hydroxyphenylacetate sulfate						Neg
100006679	209	52747	166417	Amino Acid	Tyrosine Metabolism	196	NAMED	WVHAUDNUGBNUDZ-GOVZDWNOSA-N	O[C@H]1[C@H](OC2=CC=CC=C2)O[C@H](C(O)=O)[C@@H](O)[C@@H]1O	phenol glucuronide	phenol glucuronide	17685-05-1	78692	HMDB0060014		87235	Neg
100006726	209	52608	166573	Lipid	Endocannabinoid	2200	NAMED	KQXDGUVSAAQARU-HZJYTTRNSA-N	CCCCC/C=C\C/C=C\CCCCCCCC(NCCO)=O	linoleoyl ethanolamide	linoleoyl ethanolamide	68171-52-8	4446566	HMDB0012252		5283446	Neg
100006730	209	54730	207583	Amino Acid	Tryptophan Metabolism	323	NAMED	YDXXLJMIHMIOIF-UHFFFAOYSA-N	O=C(NCC(O)=O)CC1=CNC2=CC=CC=C21	indoleacetylglycine	indoleacetylglycine	13113-08-1	393944			446640	Neg
100008903	402	52603	165331	Lipid	Phosphatidylcholine (PC)	2377	NAMED	FVXDQWZBHIXIEJ-LNDKUQBDSA-N	CCCCC/C=C\C/C=C\CCCCCCCC(OC[C@@H](OC(CCCCCCC/C=C\C/C=C\CCCCC)=O)COP([O-])(OCC[N+](C)(C)C)=O)=O	1,2-dilinoleoyl-GPC (18:2/18:2)	1,2-dilinoleoyl-GPC (18:2/18:2)	998-06-1	4450312	HMDB0008138		5288075	Pos Late
100008904	402	52438	164562	Lipid	Phosphatidylcholine (PC)	2340	NAMED	ATHVAWFAEPLPPQ-VRDBWYNSSA-N	O=C(CCCCCCCCCCCCCCCCC)OC[C@]([H])(COP(OCC[N+](C)(C)C)([O-])=O)OC(CCCCCCC/C=C\CCCCCCCC)=O	1-stearoyl-2-oleoyl-GPC (18:0/18:1)	1-stearoyl-2-oleoyl-GPC (18:0/18:1)	56421-10-4	24766704	HMDB0008038		24778825	Pos Late
100008905	402	52457	165141	Lipid	Phosphatidylcholine (PC)	2362	NAMED	SNKAWJBJQDLSFF-NVKMUCNASA-N	O=C(CCCCCCC/C=C\CCCCCCCC)OC[C@@]([H])(OC(CCCCCCC/C=C\CCCCCCCC)=O)COP([O-])(OCC[N+](C)(C)C)=O	1,2-dioleoyl-GPC (18:1/18:1)	1,2-dioleoyl-GPC (18:1/18:1)	4235-95-4	8525772	HMDB0000593		10350317	Pos Late
100008914	402	52462	165128	Lipid	Phosphatidylcholine (PC)	2315	NAMED	IIZPXYDJLKNOIY-JXPKJXOSSA-N	CCCCCCCCCCCCCCCC(OC[C@@]([H])(OC(CCC/C=C\C/C=C\C/C=C\C/C=C\CCCCC)=O)COP([O-])(OCC[N+](C)(C)C)=O)=O	1-palmitoyl-2-arachidonoyl-GPC (16:0/20:4n6)	1-palmitoyl-2-arachidonoyl-GPC (16:0/20:4n6)	35418-58-7	8923140	HMDB0007982	C05208	10747814	Pos Late
100008915	402	52610	165342	Lipid	Phosphatidylcholine (PC)	2321	NAMED	IESVDEZGAHUQJU-ZLBXKVHBSA-N	CCCCCCCCCCCCCCCC(OC[C@](OC(CC/C=C\C/C=C\C/C=C\C/C=C\C/C=C\C/C=C\CC)=O)([H])COP([O-])(OCC[N+](C)(C)C)=O)=O	1-palmitoyl-2-docosahexaenoyl-GPC (16:0/22:6)	1-palmitoyl-2-docosahexaenoyl-GPC (16:0/22:6)	59403-54-2	4946007	HMDB0007991		6441886	Pos Late
100008916	402	52611	165343	Lipid	Phosphatidylcholine (PC)	2357	NAMED	FAUYAENFVCNTAL-PFFNLMTBSA-N	O=C(CC/C=C\C/C=C\C/C=C\C/C=C\C/C=C\C/C=C\CC)O[C@H](COC(CCCCCCCCCCCCCCCCC)=O)CO[P](OCC[N+](C)(C)C)([O-])=O	1-stearoyl-2-docosahexaenoyl-GPC (18:0/22:6)	1-stearoyl-2-docosahexaenoyl-GPC (18:0/22:6)	59403-52-0		HMDB0008057		24778876	Pos Late
100008917	402	52612	165344	Lipid	Plasmalogen	2843	NAMED	DSWOVBIRJNAJAF-NVJOKYTBSA-N	[H][C@@](COP([O-])(OCC[N+](C)(C)C)=O)(OC(CCCCCCC/C=C\CCCCCCCC)=O)CO/C=C\CCCCCCCCCCCCCCCC	1-(1-enyl-stearoyl)-2-oleoyl-GPC (P-18:0/18:1)	1-(1-enyl-stearoyl)-2-oleoyl-GPC (P-18:0/18:1)	799268-63-6	24767518	HMDB0011243		42607428	Pos Late
100008918	402	52613	165345	Lipid	Plasmalogen	2834	NAMED	FHHVIBPVBBRLOR-IYACIECVSA-N	O=C(O[C@](COP([O-])(OCC[N+](C)(C)C)=O)([H])CO/C=C\CCCCCCCCCCCCCCCC)CCC/C=C\C/C=C\C/C=C\C/C=C\CCCCC	1-(1-enyl-stearoyl)-2-arachidonoyl-GPC (P-18:0/20:4)	1-(1-enyl-stearoyl)-2-arachidonoyl-GPC (P-18:0/20:4)	97802-56-7	24767528	HMDB0011253		24779390	Pos Late
100008919	402	52614	165346	Lipid	Plasmalogen	2827	NAMED	XVYPOHCSLJZFED-QZEVRULJSA-N	[H][C@@](COP([O-])(OCC[NH3+])=O)(OC(CCCCCCC/C=C\CCCCCCCC)=O)CO/C=C\CCCCCCCCCCCCCCCC	1-(1-enyl-stearoyl)-2-oleoyl-GPE (P-18:0/18:1)	1-(1-enyl-stearoyl)-2-oleoyl-GPE (P-18:0/18:1)	144371-68-6	24769260	HMDB0011375		42607457	Pos Late
100008920	402	52615	165347	Lipid	Sphingomyelins	3139	NAMED	YMQZQHIESOAPQH-JXGHDCMNSA-N	O=C(N[C@@]([C@]([H])(O)/C=C/CCCCCCCCCCCCC)([H])COP([O-])(OCC[N+](C)(C)C)=O)CCCCCCCCCCCCCCCC	sphingomyelin (d18:1/17:0, d17:1/18:0, d19:1/16:0)	sphingomyelin (d18:1/17:0, d17:1/18:0, d19:1/16:0)	121999-64-2		HMDB0240620,HMDB0240609,HMDB0240622		46891763	Pos Late
100008921	402	52616	165348	Lipid	Phosphatidylcholine (PC)	2299	NAMED	PZNPLUBHRSSFHT-RRHRGVEJSA-N	O=C(CCCCCCCCCCCCCCC)OC[C@]([H])(COP(OCC[N+](C)(C)C)([O-])=O)OC(CCCCCCCCCCCCCCCCC)=O	1-palmitoyl-2-stearoyl-GPC (16:0/18:0)	1-palmitoyl-2-stearoyl-GPC (16:0/18:0)	59403-51-9	24766643	HMDB0007970	C03889	24778686	Pos Late
100008928	305	52281	164309	Amino Acid	Glutathione Metabolism	590	NAMED	AFENDNXGAFYKQO-UHFFFAOYSA-N	CCC(O)C(O)=O	2-hydroxybutyrate/2-hydroxyisobutyrate	2-hydroxybutyrate/2-hydroxyisobutyrate			HMDB0000729,HMDB00008	C21297,C05984	440864,4277439	Polar
100008929	209	52282	164310	Energy	TCA Cycle	1478	NAMED	YNOXCRMFGMSKIJ-UHFFFAOYSA-N	CC(C(O)=O)C(C(O)=O)(O)CC(O)=O	2-methylcitrate/homocitrate	2-methylcitrate/homocitrate			HMDB0003518,HMDB0000379	C01251	439459,515	Neg
100008930	209	52285	164313	Lipid	Long Chain Monounsaturated Fatty Acid	1551	NAMED	ZQPPMHVWECSIRJ-KTKRTIGZSA-N	OC(CCCCCCC/C=C\CCCCCCCC)=O	oleate/vaccenate (18:1)	oleate/vaccenate (18:1)			HMDB0003231,HMDB0000573,HMDB0240219,HMDB0000207	C21944,C08367,C01712,C00712	5282761,637517,5281127,445639	Neg
100008931	209	52749	166419	Amino Acid	Tryptophan Metabolism	328	NAMED	KUYNOZVWCFXSNE-BYNIDDHOSA-N	O[C@H]([C@@H](O)[C@@H]1O)[C@@H](O[C@@H]1C(O)=O)OC2=CNC3=C2C=CC=C3	indoxyl glucuronide	indoxyl glucuronide	35804-66-1	2015556	HMDB0010319		2733785	Neg
100008932	209	63154	221893	Peptide	Acetylated Peptides	1214	NAMED	QUWZFULUMBECLL-UHFFFAOYSA-N	O=C(NCCS(=O)(O)=O)CC1=CC=CC=C1	phenylacetyltaurine	phenylacetyltaurine	33953-90-1	1627903			2179693	Neg
100008933	209	52938	166054	Lipid	Fatty Acid, Monohydroxy	2007	NAMED	POMQYTSPMKEQNB-UHFFFAOYSA-N	OC(CC(O)CCCCCCCCCCCCCCC)=O	3-hydroxystearate	3-hydroxystearate	45261-96-9	4446034	HMDB10737		5282907	Neg
100008934	209	52916	166016	Lipid	Fatty Acid, Monohydroxy	1984	NAMED	YDZIJQXINJLRLL-UHFFFAOYSA-N	OC(C(O)CCCCCCCCCC)=O	2-hydroxylaurate	2-hydroxylaurate	2984-55-6	88259			97783	Neg
100008952	209	52431	164555	Lipid	Monoacylglycerol	2872	NAMED	KVYUBFKSKZWZSV-BQYQJAHWSA-N	CCCCCC/C=C/CCCCCCCC(OCC(O)CO)=O	1-palmitoleoylglycerol (16:1)*	1-palmitoleoylglycerol (16:1)*			HMDB0011565			Neg
100008953	209	52432	164556	Lipid	Monoacylglycerol	2889	NAMED	CXUXMSACCLYMBI-BQYQJAHWSA-N	CCCCCC/C=C/CCCCCCCC(OC(CO)CO)=O	2-palmitoleoylglycerol (16:1)*	2-palmitoleoylglycerol (16:1)*			HMDB0011534		53480960	Neg
100008954	402	52434	164558	Lipid	Dihydrosphingomyelins	3120	NAMED	QHZIGNLCLJPLCU-QPPIDDCLSA-N	[H][C@](NC(CCCCCCCCCCCCCCC)=O)(COP(OCC[N+](C)(C)C)([O-])=O)[C@@](O)([H])CCCCCCCCCCCCCCC	palmitoyl dihydrosphingomyelin (d18:0/16:0)*	palmitoyl dihydrosphingomyelin (d18:0/16:0)*		8115586	HMDB0010168		9939965	Pos Late
100008955	402	52436	164560	Lipid	Sphingomyelins	3128	NAMED	SXZWBNWTCVLZJN-NMIJJABPSA-N	[H][C@](NC(CCCCCCCCCCCCCCCCCCCCCC)=O)(COP(OCC[N+](C)(C)C)([O-])=O)[C@@](O)([H])/C=C/CCCCCCCCCCCCC	tricosanoyl sphingomyelin (d18:1/23:0)*	tricosanoyl sphingomyelin (d18:1/23:0)*			HMDB0012105			Pos Late
100008956	402	52435	164559	Lipid	Sphingomyelins	3149	NAMED	JBDGKEXQKCCQFK-JWQIMADESA-N	[H][C@](NC(CCCCCCCCCCCCCCCCCCCCCC)=O)(COP(OCC[N+](C)(C)C)([O-])=O)[C@@](O)([H])/C=C/CCCCCCCC/C=C\CCC	sphingomyelin (d18:2/23:0, d18:1/23:1, d17:1/24:1)*	sphingomyelin (d18:2/23:0, d18:1/23:1, d17:1/24:1)*			HMDB0240634,HMDB0011696,HMDB0240614		134757653	Pos Late
100008957	402	52437	164561	Lipid	Sphingomyelins	3151	NAMED	TXFLWJQVQCDUDZ-BRUGZULGSA-N	[H][C@](NC(CCCCCCCCCCCCC/C=C\CCCCCCCC)=O)(COP(OCC[N+](C)(C)C)([O-])=O)[C@@](O)([H])/C=C/CCCCCCCC/C=C\CCC	sphingomyelin (d18:2/24:1, d18:1/24:2)*	sphingomyelin (d18:2/24:1, d18:1/24:2)*			HMDB0240636,HMDB0240615		85336023	Pos Late
100008976	402	52446	165108	Lipid	Phosphatidylethanolamine (PE)	2447	NAMED	YDTWOEYVDRKKCR-KNERPIHHSA-N	O=C(CCCCCCCCCCCCCCCCC)OC[C@]([H])(COP(OCCN)(O)=O)OC(CCCCCCC/C=C\C/C=C\CCCCC)=O	1-stearoyl-2-linoleoyl-GPE (18:0/18:2)*	1-stearoyl-2-linoleoyl-GPE (18:0/18:2)*		7825699	HMDB0008994		9546749	Pos Late
100008977	402	52447	165110	Lipid	Phosphatidylethanolamine (PE)	2456	NAMED	ANRKEHNWXKCXDB-BHFWLYLHSA-N	O=C(CCCCCCCCCCCCCCCCC)OC[C@]([H])(COP(OCCN)(O)=O)OC(CCC/C=C\C/C=C\C/C=C\C/C=C\CCCCC)=O	1-stearoyl-2-arachidonoyl-GPE (18:0/20:4)	1-stearoyl-2-arachidonoyl-GPE (18:0/20:4)		4451158	HMDB0009003	C05210	5289133	Pos Late
100008980	402	52452	165115	Lipid	Phosphatidylcholine (PC)	2343	NAMED	FORFDCPQKJHEBF-JEFUZMEDSA-N	CCCCCCCCCCCCCCCCCC(OCC(OC(CCCCCCC/C=C/C/C=C/CCCCC)=O)COP([O-])(OCC[N+](C)(C)C)=O)=O	1-stearoyl-2-linoleoyl-GPC (18:0/18:2)*	1-stearoyl-2-linoleoyl-GPC (18:0/18:2)*			HMDB0008039		6441487	Pos Late
100008981	402	52453	165118	Lipid	Phosphatidylcholine (PC)	2366	NAMED	GDWULUGDXGHJIJ-FUBJOMBKSA-N	CCCCCCCC/C=C/CCCCCCCC(OCC(OC(CCCCCCC/C=C/C/C=C/CCCCC)=O)COP([O-])(OCC[N+](C)(C)C)=O)=O	1-oleoyl-2-linoleoyl-GPC (18:1/18:2)*	1-oleoyl-2-linoleoyl-GPC (18:1/18:2)*			HMDB0008105		24778939	Pos Late
100008984	402	52470	165143	Lipid	Phosphatidylcholine (PC)	2297	NAMED	QIBZFHLFHCIUOT-HTXNQAPBSA-N	CCCCCCCCCCCCCCCC(OCC(OC(CCCCCCC/C=C/CCCCCC)=O)COP([O-])(OCC[N+](C)(C)C)=O)=O	1-palmitoyl-2-palmitoleoyl-GPC (16:0/16:1)*	1-palmitoyl-2-palmitoleoyl-GPC (16:0/16:1)*			HMDB0007969		6443788	Pos Late
100008985	402	52454	165119	Lipid	Phosphatidylcholine (PC)	2311	NAMED	SRIGHEHXEGELQJ-YYQUKWHJSA-N	CCCCCCCCCCCCCCCC(OC[C@@H](OC(CCCCCC/C=C\C/C=C\C/C=C\CCCCC)=O)COP([O-])(OCC[N+](C)(C)C)=O)=O	1-palmitoyl-2-dihomo-linolenoyl-GPC (16:0/20:3n3 or 6)*	1-palmitoyl-2-dihomo-linolenoyl-GPC (16:0/20:3n3 or 6)*						Pos Late
100008990	402	52464	165131	Lipid	Phosphatidylethanolamine (PE)	2434	NAMED	DRIVXEVMDWCWLI-CAQMIEAISA-N	O=C(CCCCCCCCCCCCCCC)OC[C@]([H])(COP(OCCN)(O)=O)OC(CCC/C=C\C/C=C\C/C=C\C/C=C\CCCCC)=O	1-palmitoyl-2-arachidonoyl-GPE (16:0/20:4)*	1-palmitoyl-2-arachidonoyl-GPE (16:0/20:4)*		7825750	HMDB0005323	C05210	9546800	Pos Late
100008991	402	52465	165133	Lipid	Phosphatidylethanolamine (PE)	2436	NAMED	MPWUZHVZZKSTPV-MADBQMNMSA-N	O=C(CCCCCCCCCCCCCCC)OC[C@]([H])(COP(OCCN)(O)=O)OC(CC/C=C\C/C=C\C/C=C\C/C=C\C/C=C\C/C=C\CC)=O	1-palmitoyl-2-docosahexaenoyl-GPE (16:0/22:6)*	1-palmitoyl-2-docosahexaenoyl-GPE (16:0/22:6)*		7825749	HMDB0008946		9546799	Pos Late
100008992	402	52466	165134	Lipid	Phosphatidylethanolamine (PE)	2460	NAMED	XYYHNDVKALDFHQ-OXHZBIAZSA-N	O=C(CCCCCCCCCCCCCCCCC)OC[C@]([H])(COP(OCCN)(O)=O)OC(CC/C=C\C/C=C\C/C=C\C/C=C\C/C=C\C/C=C\CC)=O	1-stearoyl-2-docosahexaenoyl-GPE (18:0/22:6)*	1-stearoyl-2-docosahexaenoyl-GPE (18:0/22:6)*		7825748	HMDB0009012		9546798	Pos Late
100008993	402	52467	208085	Lipid	Phosphatidylinositol (PI)	2557	NAMED	KIQYUSYSJTUGFZ-LSLODQAYSA-N	O=C(CCCCCCCCCCCCCCC)OC[C@@]([H])(OC(CCC/C=C\C/C=C\C/C=C\C/C=C\CCCCC)=O)COP(O[C@H]1[C@H](O)[C@@H](O)[C@H](O)[C@@H](O)[C@H]1O)(O)=O	1-palmitoyl-2-arachidonoyl-GPI (16:0/20:4)*	1-palmitoyl-2-arachidonoyl-GPI (16:0/20:4)*		24767674	HMDB0009789			Pos Late
100008994	402	52468	208084	Lipid	Phosphatidylinositol (PI)	2561	NAMED	KZVRAFHIKMDULK-HAVSRZFESA-N	O=C(CCCCCCCCCCCCCCCCC)OC[C@@]([H])(OC(CCCCCCC/C=C\C/C=C\CCCCC)=O)COP(O[C@H]1[C@H](O)[C@@H](O)[C@H](O)[C@@H](O)[C@H]1O)(O)=O	1-stearoyl-2-linoleoyl-GPI (18:0/18:2)	1-stearoyl-2-linoleoyl-GPI (18:0/18:2)		24767694	HMDB0009809			Pos Late
100008998	402	52473	165151	Cofactors and Vitamins	Tocopherol Metabolism	4404	NAMED	QUEDXNHFTDJVIY-DQCZWYHMSA-N	CC1=C(C(CC2)=CC(O)=C1C)O[C@@]2(CCC[C@@H](CCC[C@@H](CCCC(C)C)C)C)C	gamma-tocopherol/beta-tocopherol	gamma-tocopherol/beta-tocopherol			HMDB0006335,HMDB0001492	C14152,C02483		Pos Late
100008999	402	52475	165154	Lipid	Plasmalogen	2836	NAMED	URPXXNCTXCOATD-FXMFQVEGSA-N	[H][C@](OC(CCC/C=C\C/C=C\C/C=C\C/C=C\CCCCC)=O)(COP(OCCN)(O)=O)CO/C=C\CCCCCCCCCCCCCCCC	1-(1-enyl-stearoyl)-2-arachidonoyl-GPE (P-18:0/20:4)*	1-(1-enyl-stearoyl)-2-arachidonoyl-GPE (P-18:0/20:4)*		7826008	HMDB0005779		9547058	Pos Late
100009002	402	52673	165435	Lipid	Plasmalogen	2822	NAMED	UUYSKERSKRMYME-MAIXUNBTSA-N	[H][C@](OC(CCC/C=C\C/C=C\C/C=C\C/C=C\CCCCC)=O)(COP(OCCN)(O)=O)CO/C=C\CCCCCCCCCCCCCC	1-(1-enyl-palmitoyl)-2-arachidonoyl-GPE (P-16:0/20:4)*	1-(1-enyl-palmitoyl)-2-arachidonoyl-GPE (P-16:0/20:4)*		24769238	HMDB0011352		52925126	Pos Late
100009005	402	52477	165158	Lipid	Plasmalogen	2818	NAMED	ZVVYJAAMWXATNY-PRWZWGSOSA-N	[H][C@](OC(CCCCCCC/C=C\CCCCCCCC)=O)(COP(OCCN)(O)=O)CO/C=C\CCCCCCCCCCCCCC	1-(1-enyl-palmitoyl)-2-oleoyl-GPE (P-16:0/18:1)*	1-(1-enyl-palmitoyl)-2-oleoyl-GPE (P-16:0/18:1)*		24769228	HMDB0011342		52925128	Pos Late
100009007	402	52478	165160	Lipid	Plasmalogen	2824	NAMED	CRBBMHQTIAELIS-KQBBALDBSA-N	[H][C@](OC(CCCCCCC/C=C\CCCCCCCC)=O)(CO[P-](OCC[N+](C)(C)C)([O])=O)CO/C=C\CCCCCCCCCCCCCC	1-(1-enyl-palmitoyl)-2-oleoyl-GPC (P-16:0/18:1)*	1-(1-enyl-palmitoyl)-2-oleoyl-GPC (P-16:0/18:1)*			HMDB0007996		34779384	Pos Late
100009009	402	52682	165449	Lipid	Plasmalogen	2832	NAMED	QLEHHUPUHJPURI-PWYDUFMYSA-N	[H][C@](OC(CCCCCCC/C=C\C/C=C\CCCCC)=O)(COP(OCC[N+](C)(C)C)([O-])=O)CO/C=C\CCCCCCCCCCCCCC	1-(1-enyl-palmitoyl)-2-linoleoyl-GPC (P-16:0/18:2)*	1-(1-enyl-palmitoyl)-2-linoleoyl-GPC (P-16:0/18:2)*		24767486	HMDB0011211		24779386	Pos Late
100009014	402	52689	165459	Lipid	Plasmalogen	2831	NAMED	IOYKZPNDXIIXLN-LOQSCQKMSA-N	[H][C@](OC(CCC/C=C\C/C=C\C/C=C\C/C=C\CCCCC)=O)(COP(OCC[N+](C)(C)C)([O-])=O)CO/C=C\CCCCCCCCCCCCCC	1-(1-enyl-palmitoyl)-2-arachidonoyl-GPC (P-16:0/20:4)*	1-(1-enyl-palmitoyl)-2-arachidonoyl-GPC (P-16:0/20:4)*		24767495	HMDB0011220			Pos Late
100009019	402	57333	210831	Lipid	Plasmalogen	2813	NAMED	GBNPCIWXLWZJGA-ADTCAWDJSA-N	CCCCCCCCCCCCCCCCCCOCC(OC(CCC/C=C/C/C=C/C/C=C/C/C=C/CCCCC)=O)COP([O-])(OCC[N+](C)(C)C)=O	1-stearyl-2-arachidonoyl-GPC (O-18:0/20:4)*	1-stearyl-2-arachidonoyl-GPC (O-18:0/20:4)*						Pos Late
100009025	402	52495	165187	Lipid	Sphingomyelins	3145	NAMED	YXSZOBWVQJIWNE-QVDCKBILSA-N	[H][C@](NC(CCCCCCCCCCCCCCCCCCCC)=O)(COP(OCC[N+](C)(C)C)([O-])=O)[C@@](O)([H])/C=C/CCCCCCCCCCCCC	sphingomyelin (d18:1/21:0, d17:1/22:0, d16:1/23:0)*	sphingomyelin (d18:1/21:0, d17:1/22:0, d16:1/23:0)*			HMDB0240619,HMDB0240611,HMDB0240621			Pos Late
100009026	402	57331	210829	Lipid	Dihydrosphingomyelins	3121	NAMED	FONAXCRWZQFJHY-JCGOJSMZSA-N	[H][C@](NC(CCCCCCCCCCCCCCCCCCCCC)=O)(COP(OCC[N+](C)(C)C)([O-])=O)[C@@](O)([H])CCCCCCCCCCCCCCC	behenoyl dihydrosphingomyelin (d18:0/22:0)*	behenoyl dihydrosphingomyelin (d18:0/22:0)*		24846880	HMDB0012091		44260132	Pos Late
100009027	402	57473	211136	Lipid	Dihydrosphingomyelins	3122	NAMED	JCELSEVNSMXGKA-IOLBBIBUSA-N	[H][C@](NC(CCCCCCCCCCCCCCCCC)=O)(COP(OCC[N+](C)(C)C)([O-])=O)[C@@](O)([H])CCCCCCCCCCCCCCC	sphingomyelin (d18:0/18:0, d19:0/17:0)*	sphingomyelin (d18:0/18:0, d19:0/17:0)*		24846878	HMDB0012087		44260130	Pos Late
100009028	402	52604	165334	Lipid	Dihydroceramides	3029	NAMED	GCGTXOVNNFGTPQ-JHOUSYSJSA-N	[H][C@](NC(CCCCCCCCCCCCCCC)=O)(CO)[C@@](O)([H])CCCCCCCCCCCCCCC	N-palmitoyl-sphinganine (d18:0/16:0)	N-palmitoyl-sphinganine (d18:0/16:0)	5966-29-0	4446685	HMDB11760		5283572	Pos Late
100009035	402	52497	165189	Lipid	Phosphatidylcholine (PC)	2289	NAMED	DGBYUHHIADYUMU-UESLNCBNSA-N	O=C(CCCCCCCCCCCCCC)OC[C@]([H])(COP(OCC[N+](C)(C)C)([O-])=O)OC(CCCCCCC/C=C\C/C=C\CCCCC)=O	1-pentadecanoyl-2-linoleoyl-GPC (15:0/18:2)*	1-pentadecanoyl-2-linoleoyl-GPC (15:0/18:2)*		24766615	HMDB0007940		24778664	Pos Late
100009036	402	52499	165191	Lipid	Phosphatidylcholine (PC)	2334	NAMED	SXNXGNVZTLZDHE-IYEJTHTFSA-N	O=C(CCCCCCCCCCCCCCCC)OC[C@]([H])(COP(OCC[N+](C)(C)C)([O-])=O)OC(CCCCCCC/C=C\CCCCCCCC)=O	1-margaroyl-2-oleoyl-GPC (17:0/18:1)*	1-margaroyl-2-oleoyl-GPC (17:0/18:1)*		24822423				Pos Late
100009051	402	52629	165382	Lipid	Phosphatidylcholine (PC)	2347	NAMED	VGSUMLIRUGDCTF-NSMRCOLJSA-N	O=C(CCCCCCCCCCCCCCCCC)OC[C@]([H])(COP(OCC[N+](C)(C)C)([O-])=O)OC(CCCCCC/C=C\C/C=C\C/C=C\CCCCC)=O	1-stearoyl-2-dihomo-linolenoyl-GPC (18:0/20:3n3 or 6)*	1-stearoyl-2-dihomo-linolenoyl-GPC (18:0/20:3n3 or 6)*		24766712	HMDB0008047			Pos Late
100009052	402	52633	165386	Lipid	Diacylglycerol	2926	NAMED	SVXWJFFKLMLOHO-YAIZGCQRSA-N	OC[C@]([H])(OC(CCCCCCC/C=C\C/C=C\CCCCC)=O)COC(CCCCCCCCCCCCCCC)=O	palmitoyl-linoleoyl-glycerol (16:0/18:2) [1]*	palmitoyl-linoleoyl-glycerol (16:0/18:2) [1]*		7822645	HMDB0007103		9543695	Pos Late
100009055	402	52634	165387	Lipid	Diacylglycerol	2927	NAMED	ZKYDYRLDJZZKEU-BCTRXSSUSA-N	CCCCCCCCCCCCCCCC(OCC(O)COC(CCCCCCC/C=C\C/C=C\CCCCC)=O)=O	palmitoyl-linoleoyl-glycerol (16:0/18:2) [2]*	palmitoyl-linoleoyl-glycerol (16:0/18:2) [2]*			HMDB0007103		131801744	Pos Late
100009066	402	52669	208075	Lipid	Phosphatidylinositol (PI)	2552	NAMED	PDLAMJKMOKWLAJ-KTBSNPQYSA-N	O=C(CCCCCCCCCCCCCCC)OC[C@@]([H])(OC(CCCCCCC/C=C\CCCCCCCC)=O)COP(O[C@H]1[C@H](O)[C@@H](O)[C@H](O)[C@@H](O)[C@H]1O)(O)=O	1-palmitoyl-2-oleoyl-GPI (16:0/18:1)*	1-palmitoyl-2-oleoyl-GPI (16:0/18:1)*		24767668	HMDB0009783		71296232	Pos Late
100009069	402	52677	165443	Lipid	Plasmalogen	2819	NAMED	LJVXDBWIBQQKFU-CCJYEBHUSA-N	[H][C@](OC(CCCCCCC/C=C\C/C=C\CCCCC)=O)(COP(OCCN)(O)=O)CO/C=C\CCCCCCCCCCCCCC	1-(1-enyl-palmitoyl)-2-linoleoyl-GPE (P-16:0/18:2)*	1-(1-enyl-palmitoyl)-2-linoleoyl-GPE (P-16:0/18:2)*		24769229	HMDB0011343		52925127	Pos Late
100009075	402	52683	165450	Lipid	Phosphatidylcholine (PC)	2327	NAMED	QJWDAOSZZYVBJZ-KXESGEQTSA-N	O=C(CCCCCCC/C=C\CCCCCC)OC[C@]([H])(COP(OCC[N+](C)(C)C)([O-])=O)OC(CCCCCCC/C=C\C/C=C\CCCCC)=O	1-palmitoleoyl-2-linoleoyl-GPC (16:1/18:2)*	1-palmitoleoyl-2-linoleoyl-GPC (16:1/18:2)*		24766675	HMDB0008006		24778768	Pos Late
100009078	402	52687	165457	Lipid	Phosphatidylethanolamine (PE)	2462	NAMED	GKAFCSRKMWFPSJ-RJXNKANHSA-N	O=C(CCCCCCC/C=C\CCCCCCCC)OC[C@]([H])(COP(OCCN)(O)=O)OC(CCCCCCC/C=C\C/C=C\CCCCC)=O	1-oleoyl-2-linoleoyl-GPE (18:1/18:2)*	1-oleoyl-2-linoleoyl-GPE (18:1/18:2)*		7825703	HMDB0005349		9546753	Pos Late
100009082	305	52690	165463	Lipid	Lysophospholipid	2605	NAMED	ZQTAMPRZFOOEEP-KKFOGOCZSA-N	O=C(CCCCCCC/C=C\C/C=C\CCCCC)OC[C@]([H])(COP(O)(O)=O)O	1-linoleoyl-GPA (18:2)*	1-linoleoyl-GPA (18:2)*		24766514	HMDB0007856			Polar
100009123	402	53197	166627	Lipid	Phosphatidylcholine (PC)	2291	NAMED	GEINPYKZLFHHIL-HEXXMCQTSA-N	O=C(CCCCCCCCCCCCCC)OC[C@]([H])(COP(OCC[N+](C)(C)C)([O-])=O)OC(CC/C=C\C/C=C\C/C=C\C/C=C\C/C=C\C/C=C\CC)=O	1-pentadecanoyl-2-docosahexaenoyl-GPC (15:0/22:6)*	1-pentadecanoyl-2-docosahexaenoyl-GPC (15:0/22:6)*		24766633	HMDB0007958		52922342	Pos Late
100009124	402	53193	166623	Lipid	Phosphatidylcholine (PC)	2336	NAMED	MHUZXLUKTLNHIX-GUNPMBPGSA-N	O=C(CCCCCCCCCCCCCCCC)OC[C@]([H])(COP(OCC[N+](C)(C)C)([O-])=O)OC(CCC/C=C\C/C=C\C/C=C\C/C=C\CCCCC)=O	1-margaroyl-2-arachidonoyl-GPC (17:0/20:4)*	1-margaroyl-2-arachidonoyl-GPC (17:0/20:4)*		24822197				Pos Late
100009126	402	55062	208176	Lipid	Phosphatidylcholine (PC)	2392	NAMED	UAVRPIXHIHJERN-CBTSKTMBSA-N	O=C(CCCCCCCCCCCCCCCCCCC)OC[C@]([H])(COP(OCC[N+](C)(C)C)([O-])=O)OC(CCC/C=C\C/C=C\C/C=C\C/C=C\CCCCC)=O	1-arachidoyl-2-arachidonoyl-GPC (20:0/20:4)*	1-arachidoyl-2-arachidonoyl-GPC (20:0/20:4)*		24766940	HMDB0008279		24779048	Pos Late
100009130	402	52697	165470	Lipid	Phosphatidylcholine (PC)	2376	NAMED	FPEVDFOXMCHLKL-KFDYCXSYSA-N	O=C(CCCCCCC/C=C\CCCCCCCC)OC[C@]([H])(COP(OCC[N+](C)(C)C)([O-])=O)OC(CC/C=C\C/C=C\C/C=C\C/C=C\C/C=C\C/C=C\CC)=O	1-oleoyl-2-docosahexaenoyl-GPC (18:1/22:6)*	1-oleoyl-2-docosahexaenoyl-GPC (18:1/22:6)*		24766785	HMDB0008123		24778955	Pos Late
100009131	402	52710	165488	Lipid	Phosphatidylcholine (PC)	2383	NAMED	ZZSZQATYGVHNLZ-PUMLCSCDSA-N	O=C(CCCCCCC/C=C\C/C=C\CCCCC)OC[C@]([H])(COP(OCC[N+](C)(C)C)([O-])=O)OC(CCC/C=C\C/C=C\C/C=C\C/C=C\CCCCC)=O	1-linoleoyl-2-arachidonoyl-GPC (18:2/20:4n6)*	1-linoleoyl-2-arachidonoyl-GPC (18:2/20:4n6)*		24766809	HMDB0008147	C05208	24778979	Pos Late
100009132	402	53199	166629	Lipid	Phosphatidylcholine (PC)	2387	NAMED	FCTKCFNDGVBOBD-YZXVGOFNSA-N	O=C(CCCCCCC/C=C\C/C=C\CCCCC)OC[C@]([H])(COP(OCC[N+](C)(C)C)([O-])=O)OC(CC/C=C\C/C=C\C/C=C\C/C=C\C/C=C\C/C=C\CC)=O	1-linoleoyl-2-docosahexaenoyl-GPC (18:2/22:6)*	1-linoleoyl-2-docosahexaenoyl-GPC (18:2/22:6)*		24766818	HMDB0008156		24778983	Pos Late
100009134	402	53175	166600	Lipid	Plasmalogen	2810	NAMED	IQACMFWAGALEAQ-WESJWMGVSA-N	[H][C@](OC(CCCCCCC/C=C\C/C=C\CCCCC)=O)(COP(OCC[N+](C)(C)C)([O-])=O)COCCCCCCCCCCCCCCCC	1-palmityl-2-linoleoyl-GPC (O-16:0/18:2)*	1-palmityl-2-linoleoyl-GPC (O-16:0/18:2)*		4947190	HMDB0011151		6443157	Pos Late
100009139	402	53195	166625	Lipid	Phosphatidylcholine (PC)	2284	NAMED	SRQSAJRUMDQMMS-NLDJLLEISA-N	O=C(CCCCCCCCCCCCC)OC[C@]([H])(COP(OCC[N+](C)(C)C)([O-])=O)OC(CCC/C=C\C/C=C\C/C=C\C/C=C\CCCCC)=O	1-myristoyl-2-arachidonoyl-GPC (14:0/20:4)*	1-myristoyl-2-arachidonoyl-GPC (14:0/20:4)*		24766559	HMDB0007883		24778634	Pos Late
100009146	402	55061	208175	Lipid	Phosphatidylcholine (PC)	2354	NAMED	AXZGUCXCTZMPTR-UVGACIQRSA-N	O=C(CCCCCCCCCCCCCCCCC)OC[C@]([H])(COP(OCC[N+](C)(C)C)([O-])=O)OC(CCCCC/C=C\C/C=C\C/C=C\C/C=C\CCCCC)=O	1-stearoyl-2-adrenoyl-GPC (18:0/22:4)*	1-stearoyl-2-adrenoyl-GPC (18:0/22:4)*		24766718	HMDB0008054		24778868	Pos Late
100009147	402	52703	165476	Lipid	Lysoplasmalogen	2850	NAMED	XKBJVQHMEXMFDZ-AREMUKBSSA-N	[H][C@](O)(COP(OCC[N+](C)(C)C)([O-])=O)COCCCCCCCCCCCCCCCCCC	1-stearyl-GPC (O-18:0)*	1-stearyl-GPC (O-18:0)*		2015318	HMDB0011149	C04317	2733532	Pos Late
100009154	402	54812	183735	Lipid	Phosphatidylcholine (PC)	2307	NAMED	CNNSEHUKQJCGTE-UPPWDXJYSA-N	O=C(CCCCCCCCCCCCCCC)OC[C@]([H])(COP(OCC[N+](C)(C)C)([O-])=O)OC(CCCC/C=C\C/C=C\C/C=C\CCCCC)=O	1-palmitoyl-2-gamma-linolenoyl-GPC (16:0/18:3n6)*	1-palmitoyl-2-gamma-linolenoyl-GPC (16:0/18:3n6)*		24766645	HMDB0007974		24778699	Pos Late
100009160	402	52713	165492	Lipid	Plasmalogen	2821	NAMED	FZMYLOBGNYZPQO-QLSONYGBSA-N	[H][C@](OC(CCCCCCC/C=C\CCCCCC)=O)(COP(OCC[N+](C)(C)C)([O-])=O)CO/C=C\CCCCCCCCCCCCCC	1-(1-enyl-palmitoyl)-2-palmitoleoyl-GPC (P-16:0/16:1)*	1-(1-enyl-palmitoyl)-2-palmitoleoyl-GPC (P-16:0/16:1)*		24767482	HMDB0011207		52923882	Pos Late
100009162	402	52716	165495	Lipid	Plasmalogen	2820	NAMED	PEWXKAOBUSBJLD-MCBGMKGZSA-N	[H][C@](OC(CCCCCCCCCCCCCCC)=O)(COP(OCC[N+](C)(C)C)([O-])=O)CO/C=C\CCCCCCCCCCCCCC	1-(1-enyl-palmitoyl)-2-palmitoyl-GPC (P-16:0/16:0)*	1-(1-enyl-palmitoyl)-2-palmitoyl-GPC (P-16:0/16:0)*		9322076	HMDB0011206		11146967	Pos Late
100009184	402	54984	208073	Lipid	Phosphatidylinositol (PI)	2576	NAMED	ZUGLBBVIAIBIKG-KXPCXWIZSA-N	O=C(CCCCCCCCCCCCCCCCC)OC[C@@]([H])(OC(CCCCCC/C=C\C/C=C\C/C=C\CCCCC)=O)COP(O[C@H]1[C@H](O)[C@@H](O)[C@H](O)[C@@H](O)[C@H]1O)(O)=O	1-stearoyl-2-dihomo-linolenoyl-GPI (18:0/20:3n3 or 6)*	1-stearoyl-2-dihomo-linolenoyl-GPI (18:0/20:3n3 or 6)*		24767699	HMDB0009814			Pos Late
100009204	402	57341	210842	Lipid	Phosphatidylethanolamine (PE)	2422	NAMED	SLKDGVPOSSLUAI-PGUFJCEWSA-N	O=C(CCCCCCCCCCCCCCC)OC[C@]([H])(COP(OCCN)(O)=O)OC(CCCCCCCCCCCCCCC)=O	1,2-dipalmitoyl-GPE (16:0/16:0)*	1,2-dipalmitoyl-GPE (16:0/16:0)*		393103	HMDB0008923		445468	Pos Late
100009217	402	53174	166599	Lipid	Phosphatidylethanolamine (PE)	2470	NAMED	SSCDRSKJTAQNNB-DWEQTYCFSA-N	O=C(CCCCCCC/C=C\C/C=C\CCCCC)OC[C@]([H])(COP(OCCN)(O)=O)OC(CCCCCCC/C=C\C/C=C\CCCCC)=O	1,2-dilinoleoyl-GPE (18:2/18:2)*	1,2-dilinoleoyl-GPE (18:2/18:2)*		7825762	HMDB0009093		9546812	Pos Late
100009219	402	55041	210837	Lipid	Phosphatidylethanolamine (PE)	2465	NAMED	PECSWFQRRFRZPW-BHPGJWMBSA-N	O=C(CCCCCCC/C=C\CCCCCCCC)OC[C@]([H])(COP(OCCN)(O)=O)OC(CCC/C=C\C/C=C\C/C=C\C/C=C\CCCCC)=O	1-oleoyl-2-arachidonoyl-GPE (18:1/20:4)*	1-oleoyl-2-arachidonoyl-GPE (18:1/20:4)*		24768534	HMDB0009069		348281223	Pos Late
100009220	402	53209	166647	Lipid	Phosphatidylethanolamine (PE)	2469	NAMED	JZSZAGWWWKKXLO-RMEBTJIYSA-N	O=C(CCCCCCC/C=C\CCCCCCCC)OC[C@]([H])(COP(OCCN)(O)=O)OC(CC/C=C\C/C=C\C/C=C\C/C=C\C/C=C\C/C=C\CC)=O	1-oleoyl-2-docosahexaenoyl-GPE (18:1/22:6)*	1-oleoyl-2-docosahexaenoyl-GPE (18:1/22:6)*		24768542	HMDB0009078		52922113	Pos Late
100009222	402	53189	166619	Lipid	Phosphatidylethanolamine (PE)	2472	NAMED	LFGBKOUQHCWBQI-BZGLIJSBSA-N	O=C(CCCCCCC/C=C\C/C=C\CCCCC)OC[C@]([H])(COP(OCCN)(O)=O)OC(CCC/C=C\C/C=C\C/C=C\C/C=C\CCCCC)=O	1-linoleoyl-2-arachidonoyl-GPE (18:2/20:4)*	1-linoleoyl-2-arachidonoyl-GPE (18:2/20:4)*		24768565	HMDB0009102		348279332	Pos Late
100009225	402	52748	165539	Lipid	Plasmalogen	2828	NAMED	XVXISDREVDGQPX-PISDLAQISA-N	[H][C@](OC(CCCCCCC/C=C\C/C=C\CCCCC)=O)(COP(OCCN)(O)=O)CO/C=C\CCCCCCCCCCCCCCCC	1-(1-enyl-stearoyl)-2-linoleoyl-GPE (P-18:0/18:2)*	1-(1-enyl-stearoyl)-2-linoleoyl-GPE (P-18:0/18:2)*		24769261	HMDB0011376			Pos Late
100009227	209	54885	207774	Lipid	Lysophospholipid	2733	NAMED	VEEHTGYBVMTAAF-RFFZIGDUSA-N	[H][C@@](CO)(O)COP(OC[C@]([H])(O)COC(CCCCCCC/C=C\C/C=C\CCCCC)=O)(O)=O	1-linoleoyl-GPG (18:2)*	1-linoleoyl-GPG (18:2)*			HMDB0240600			Neg
100009231	400	54914	208424	Peptide	Gamma-glutamyl Amino Acid	664	NAMED	SQBNIUOYNOKDTI-WHFBIAKZSA-N	OC([C@H](CO)NC(CC[C@H](N)C(O)=O)=O)=O	gamma-glutamylserine	gamma-glutamylserine	5875-35-4	18691889	HMDB0029158		22844748	Pos Early
100009232	400	53231	179281	Xenobiotics	Chemical	6271	NAMED	DZLNHFMRPBPULJ-VKHMYHEASA-N	O=C(O)[C@]1(NCSC1)[H]	thioproline	thioproline	34592-47-4	84120	HMDB0062164		93176	Pos Early
100009233	402	52944	166270	Lipid	Fatty Acid Metabolism (Acyl Choline)	1961	NAMED	UFQZDKMTMXCDBP-UHFFFAOYSA-N	C[N+](C)(C)CCOC(CCCCCCCCCCCCCC[CH2-])=O	palmitoylcholine	palmitoylcholine		133731	HMDB0240592		151731	Pos Late
100009239	305	54724	207379	Energy	TCA Cycle	1462	NAMED	UKZDIMBDWHZXOK-UHFFFAOYSA-N	OC(C(C1)C(C(O)=O)OC1=O)=O	isocitric lactone	isocitric lactone	4702-32-3	88729			98259	Polar
100009271	400	52984	166220	Lipid	Fatty Acid Metabolism (Acyl Carnitine, Hydroxy)	1938	NAMED	UEFRDQSMQXDWTO-UHFFFAOYSA-N	CC(O)CC(OC(C[N+](C)(C)C)CC([O-])=O)=O	(S)-3-hydroxybutyrylcarnitine	(S)-3-hydroxybutyrylcarnitine			HMDB0013127		71464477	Pos Early
100009272	402	53013	166346	Lipid	Hexosylceramides (HCER)	3078	NAMED	VJLLLMIZEJJZTE-NNTBDIJYSA-N	[H][C@](O)([C@@](NC(CCCCCCCCCCCCCCC)=O)(CO[C@@H]1O[C@H](CO)[C@@H](O)[C@H](O)[C@H]1O)[H])/C=C/CCCCCCCCCCCCC	glycosyl-N-palmitoyl-sphingosine (d18:1/16:0)	glycosyl-N-palmitoyl-sphingosine (d18:1/16:0)						Pos Late
100009278	209	53034	166162	Lipid	Docosanoid	2084	NAMED	ZNEBXONKCYFJAF-BGKMTWLOSA-N	OC(CC/C=C\C/C=C\C/C=C\C=C\C(C/C=C\C/C=C\CC)O)=O	14-HDoHE/17-HDoHE	14-HDoHE/17-HDoHE			HMDB0060044,HMDB0010213		6439179,11566378	Neg
100009326	209	53243	179153	Amino Acid	Tyrosine Metabolism	242	NAMED	ICPYZFZFSLTYID-GOVZDWNOSA-N	O[C@H]([C@@H](O)[C@@H]1O)[C@@H](O[C@@H]1C(O)=O)OC(C=CC=C2)=C2O	catechol glucuronide	catechol glucuronide			HMDB0240490		75124209	Neg
100009329	305	63590	222872	Cofactors and Vitamins	Ascorbate and Aldarate Metabolism	4370	NAMED	SKKZOYBAANIUOV-ZAFYKAAXSA-N	O[C@@H](CO)[C@@](C1=O)([H])OC(O)=C1OS(O)(=O)=O	ascorbic acid 2-sulfate	ascorbic acid 2-sulfate	52174-99-9	77998	HMDB0060649		54676864	Polar
100009331	402	53260	179345	Lipid	Fatty Acid Metabolism (Acyl Choline)	1962	NAMED	GFSSJDJAEKYAGX-UHFFFAOYSA-N	O=C(CCCCCCC/[C-]=C/CCCCCCCC)OCC[N+](C)(C)C	oleoylcholine	oleoylcholine			HMDB0240596		59040790	Pos Late
100009332	402	53261	179347	Lipid	Fatty Acid Metabolism (Acyl Choline)	1970	NAMED	XUWOVXDQNYUPNL-WYTUUNCASA-N	O=C(CCC/[C-]=C/C/C=C/C/C=C/C/C=C/CCCCC)OCC[N+](C)(C)C	arachidonoylcholine	arachidonoylcholine			HMDB0240583		122198216	Pos Late
100009333	402	53263	179351	Lipid	Fatty Acid Metabolism (Acyl Choline)	1969	NAMED	OKLWSURGMYZXCS-GUTOPQIJSA-N	O=C(CC/C=[C-]/C/C=C/C/C=C/C/C=C/C/C=C/C/C=C/CC)OCC[N+](C)(C)C	docosahexaenoylcholine	docosahexaenoylcholine			HMDB0240647			Pos Late
100009335	402	53262	179349	Lipid	Fatty Acid Metabolism (Acyl Choline)	1965	NAMED	FRBBZHFNTVMXIH-OKLKQMLOSA-N	O=C(CCCCCC/C=[C-]/C/C=C/C/C=C/CCCCC)OCC[N+](C)(C)C	dihomo-linolenoyl-choline	dihomo-linolenoyl-choline			HMDB0240646			Pos Late
100009337	305	53254	179431	Xenobiotics	Food Component/Plant	5227	NAMED	SNVAIAITQIIEMQ-DUXPYHPUSA-N	OS(OC1=CC=C(C=C1O)/C=C/C(O)=O)(=O)=O	caffeic acid sulfate	caffeic acid sulfate		30777608	HMDB0041708		21668705	Polar
100009343	402	53176	166602	Lipid	Phosphatidylcholine (PC)	2378	NAMED	HZGAVPNEGHQJID-UNBCHYIMSA-N	O=C(CCCCCCC/C=C\C/C=C\CCCCC)OC[C@]([H])(COP(OCC[N+](C)(C)C)([O-])=O)OC(CCCCCCC/C=C\C/C=C\C/C=C\CC)=O	1-linoleoyl-2-linolenoyl-GPC (18:2/18:3)*	1-linoleoyl-2-linolenoyl-GPC (18:2/18:3)*		24766802	HMDB0008141		52922731	Pos Late
100009345	402	53180	166609	Lipid	Phosphatidylcholine (PC)	2328	NAMED	MMUCLZZSNHBNFL-KBTBXKTRSA-N	O=C(CCCCCCC/C=C\CCCCCC)OC[C@]([H])(COP(OCC[N+](C)(C)C)([O-])=O)OC(CCCCCCC/C=C\C/C=C\C/C=C\CC)=O	1-palmitoleoyl-2-linolenoyl-GPC (16:1/18:3)*	1-palmitoleoyl-2-linolenoyl-GPC (16:1/18:3)*		24766677	HMDB0008008		52922452	Pos Late
100009360	402	53202	166632	Lipid	Phosphatidylcholine (PC)	2374	NAMED	LQILTFYUCKNMSR-AZWNZLRBSA-N	CCCCCCCC/C=C/CCCCCCCC(OCC(OC(CCCCC/C=C/C/C=C/C/C=C/C/C=C/C/C=C/CC)=O)COP([O-])(OCC[N+](C)(C)C)=O)=O	1-oleoyl-2-docosapentaenoyl-GPC (18:1/22:5n3)*	1-oleoyl-2-docosapentaenoyl-GPC (18:1/22:5n3)*			HMDB0008122		53478773	Pos Late
100009364	402	53192	166622	Lipid	Phosphatidylcholine (PC)	2346	NAMED	QLAPQVPZKNRKSF-FYBVJDQOSA-N	CCCCCCCCCCCCCCCCCC(OCC(OC(CC/C=C/C/C=C/CCCCCCCCCCCC)=O)COP([O-])(OCC[N+](C)(C)C)=O)=O	phosphatidylcholine (18:0/20:2, 20:0/18:2)*	phosphatidylcholine (18:0/20:2, 20:0/18:2)*			HMDB0008143,HMDB0008045			Pos Late
100009393	209	57651	212701	Lipid	Long Chain Polyunsaturated Fatty Acid (n3 and n6)	1569	NAMED	KBGYPXOSNDMZRV-PDBXOOCHSA-N	CC/C=C\C/C=C\C/C=C\CCCCCC(O)=O	hexadecatrienoate (16:3n3)	hexadecatrienoate (16:3n3)	7561-64-0	4471853			91820460	Neg
100009394	209	57652	212703	Lipid	Long Chain Polyunsaturated Fatty Acid (n3 and n6)	1584	NAMED	WPJGPAAPSBVXNU-HZJYTTRNSA-N	CCCCC/C=C\C/C=C\CCCCCC(O)=O	hexadecadienoate (16:2n6)	hexadecadienoate (16:2n6)	28290-73-5	13628094	HMDB0000477		13932172	Neg
100009406	402	53223	178791	Lipid	Fatty Acid Metabolism (Acyl Carnitine, Monounsaturated)	1903	NAMED	JFAGPSOZZSTLRF-KHPPLWFESA-N	O=C(OC(CC([O-])=O)C[N+](C)(C)C)CCCCCCC/C=C\CCCCCC	palmitoleoylcarnitine (C16:1)*	palmitoleoylcarnitine (C16:1)*		28639183	HMDB0013207		71464547	Pos Late
100009407	400	53224	178792	Lipid	Fatty Acid Metabolism (Acyl Carnitine, Dicarboxylate)	1932	NAMED	NTBUXPPQHCFLOM-UHFFFAOYSA-N	[O-]C(CC(C[N+](C)(C)C)OC(CCCCCC(O)=O)=O)=O	pimeloylcarnitine/3-methyladipoylcarnitine (C7-DC)	pimeloylcarnitine/3-methyladipoylcarnitine (C7-DC)						Pos Early
100009413	209	57585	212142	Xenobiotics	Chemical	6270	NAMED	QCXJEYYXVJIFCE-UHFFFAOYSA-N	CC(NC1=CC=C(C(O)=O)C=C1)=O	4-acetamidobenzoate	4-acetamidobenzoate	556-08-1	18177		D03836	6918889	Neg
100010834	305	54676	180875	Lipid	Fatty Acid, Dicarboxylate	1680	NAMED	XJMMNTGIMDZPMU-UHFFFAOYSA-N	OC(CC(CC(O)=O)C)=O	3-methylglutarate/2-methylglutarate	3-methylglutarate/2-methylglutarate			HMDB0000422,HMDB0000752		12284,12046	Polar
100010863	209	54917	208304	Amino Acid	Tryptophan Metabolism	311	NAMED	WPZHLFMFBBIAFZ-UHFFFAOYSA-N	O=C(NCC(O)=O)CCC1=CNC2=C1C=CC=C2	indolepropionylglycine	indolepropionylglycine		5990843			129691959	Neg
100010869	209	57547	212076	Amino Acid	Leucine, Isoleucine and Valine Metabolism	434	NAMED	AOWPAWLEXIYETE-UHFFFAOYSA-N	OC(C)(C(O)=O)C(C)O	2,3-dihydroxy-2-methylbutyrate	2,3-dihydroxy-2-methylbutyrate	14868-24-7	266858	HMDB0029576		301941	Neg
100010895	400	57554	211532	Nucleotide	Pyrimidine Metabolism, Cytidine containing	4285	NAMED	RFCQJGFZUQFYRF-ZOQUXTDFSA-N	O=C1N(C=CC(N)=N1)[C@@H]([C@H](OC)[C@@H]2O)O[C@@H]2CO	2'-O-methylcytidine	2'-O-methylcytidine	2140-72-9	133067			150971	Pos Early
100010896	209	57655	212709	Nucleotide	Pyrimidine Metabolism, Uracil containing	4244	NAMED	SXUXMRMBWZCMEN-ZOQUXTDFSA-N	CO[C@@H]1[C@@H]([C@H](O[C@H]1N2C=CC(NC2=O)=O)CO)O	2'-O-methyluridine	2'-O-methyluridine	2140-76-3	92343	HMDB0240328		102212	Neg
100010901	400	55015	208464	Peptide	Gamma-glutamyl Amino Acid	656	NAMED	LNLLNTMHVMIMOG-YUMQZZPRSA-N	O=C(N[C@@H](CCCCN)C(O)=O)CC[C@H](N)C(O)=O	gamma-glutamyl-alpha-lysine	gamma-glutamyl-alpha-lysine		58747			65254	Pos Early
100010916	402	54943	208028	Lipid	Diacylglycerol	2924	NAMED	YEJYLHKQOBOSCP-OZKTZCCCSA-N	CCCCCCCC/C=C\CCCCCCCC(O[C@@H](CO)COC(CCCCCCCCCCCCCCC)=O)=O	palmitoyl-oleoyl-glycerol (16:0/18:1) [1]*	palmitoyl-oleoyl-glycerol (16:0/18:1) [1]*			HMDB0007102	C13861	5282283	Pos Late
100010917	402	54942	208027	Lipid	Diacylglycerol	2925	NAMED	YEJYLHKQOBOSCP-OZKTZCCCSA-N	CCCCCCCC/C=C\CCCCCCCC(O[C@@H](CO)COC(CCCCCCCCCCCCCCC)=O)=O	palmitoyl-oleoyl-glycerol (16:0/18:1) [2]*	palmitoyl-oleoyl-glycerol (16:0/18:1) [2]*			HMDB0007102	C13861	5282283	Pos Late
100010918	402	54945	208030	Lipid	Diacylglycerol	2943	NAMED	AFSHUZFNMVJNKX-CLFAGFIQSA-N	OCC(OC(CCCCCCC/C=C\CCCCCCCC)=O)COC(CCCCCCC/C=C\CCCCCCCC)=O	oleoyl-oleoyl-glycerol (18:1/18:1) [1]*	oleoyl-oleoyl-glycerol (18:1/18:1) [1]*			HMDB0007218		9543716	Pos Late
100010919	402	54946	208031	Lipid	Diacylglycerol	2944	NAMED	AFSHUZFNMVJNKX-CLFAGFIQSA-N	OCC(OC(CCCCCCC/C=C\CCCCCCCC)=O)COC(CCCCCCC/C=C\CCCCCCCC)=O	oleoyl-oleoyl-glycerol (18:1/18:1) [2]*	oleoyl-oleoyl-glycerol (18:1/18:1) [2]*			HMDB0007218		9543716	Pos Late
100010922	402	54955	208040	Lipid	Diacylglycerol	2961	NAMED	KRECEGQUDDMNAQ-MYBRWWDOSA-N	OC[C@](OC(CCC/C=C\C/C=C\C/C=C\C/C=C\CCCCC)=O)(COC(CCCCCCC/C=C\C/C=C\CCCCC)=O)[H]	linoleoyl-arachidonoyl-glycerol (18:2/20:4) [1]*	linoleoyl-arachidonoyl-glycerol (18:2/20:4) [1]*			HMDB0007257		9543796	Pos Late
100010923	402	54956	208041	Lipid	Diacylglycerol	2962	NAMED	KRECEGQUDDMNAQ-MYBRWWDOSA-N	OC[C@](COC(CCCCCCC/C=C\C/C=C\CCCCC)=O)([H])OC(CCC/C=C\C/C=C\C/C=C\C/C=C\CCCCC)=O	linoleoyl-arachidonoyl-glycerol (18:2/20:4) [2]*	linoleoyl-arachidonoyl-glycerol (18:2/20:4) [2]*			HMDB0007257		9543796	Pos Late
100010924	402	54957	208042	Lipid	Diacylglycerol	2933	NAMED	YJEMDFYSDGNQNM-KUKVZOPTSA-N	CCCCCCCCCCCCCCCC(OCC(OC(CCC/C=C/C/C=C/C/C=C/C/C=C/CCCCC)=O)CO)=O	palmitoyl-arachidonoyl-glycerol (16:0/20:4) [1]*	palmitoyl-arachidonoyl-glycerol (16:0/20:4) [1]*			HMDB0007112		9543736	Pos Late
100010925	402	54958	208043	Lipid	Diacylglycerol	2934	NAMED	YJEMDFYSDGNQNM-KUKVZOPTSA-N	CCCCCCCCCCCCCCCC(OCC(CO)OC(CCC/C=C/C/C=C/C/C=C/C/C=C/CCCCC)=O)=O	palmitoyl-arachidonoyl-glycerol (16:0/20:4) [2]*	palmitoyl-arachidonoyl-glycerol (16:0/20:4) [2]*			HMDB0007112		9543736	Pos Late
100010926	402	54963	208048	Lipid	Diacylglycerol	2953	NAMED	ZDBLXLQFRZTIIU-ZPNZQGKLSA-N	OC[C@](OC(CCCC/C=C/C/C=C\C/C=C\CCCCC)=O)(COC(CCCCCCC/C=C\C/C=C\CCCCC)=O)[H]	linoleoyl-linolenoyl-glycerol (18:2/18:3) [1]*	linoleoyl-linolenoyl-glycerol (18:2/18:3) [1]*			HMDB0007249		14275409	Pos Late
100010927	402	54964	208049	Lipid	Diacylglycerol	2954	NAMED	ZDBLXLQFRZTIIU-ZPNZQGKLSA-N	OC[C@](COC(CCCCCCC/C=C\C/C=C\CCCCC)=O)([H])OC(CCCC/C=C/C/C=C\C/C=C\CCCCC)=O	linoleoyl-linolenoyl-glycerol (18:2/18:3) [2]*	linoleoyl-linolenoyl-glycerol (18:2/18:3) [2]*			HMDB0007250		9543737	Pos Late
100010928	402	54949	208034	Lipid	Diacylglycerol	2965	NAMED	GPMAAGRGFWBOSO-KLJRXRINSA-N	CCCCC/C=C/C/C=C/CCCCCCCC(OCC(OC(CC/C=C/C/C=C/C/C=C/C/C=C/C/C=C/C/C=C/CC)=O)CO)=O	linoleoyl-docosahexaenoyl-glycerol (18:2/22:6) [1]*	linoleoyl-docosahexaenoyl-glycerol (18:2/22:6) [1]*			HMDB0007266		9543899	Pos Late
100010929	402	54950	208035	Lipid	Diacylglycerol	2966	NAMED	GPMAAGRGFWBOSO-KLJRXRINSA-N	CCCCC/C=C/C/C=C/CCCCCCCC(OCC(CO)OC(CC/C=C/C/C=C/C/C=C/C/C=C/C/C=C/C/C=C/CC)=O)=O	linoleoyl-docosahexaenoyl-glycerol (18:2/22:6) [2]*	linoleoyl-docosahexaenoyl-glycerol (18:2/22:6) [2]*			HMDB0007266		9543899	Pos Late
100010930	402	54967	208052	Lipid	Diacylglycerol	2931	NAMED	BHGPPCIWDXQOMA-HZFIRFLSSA-N	CCCCCC/C=C/CCCCCCCC(OCC(OC(CCCCCCC/C=C/C/C=C/CCCCC)=O)CO)=O	palmitoleoyl-linoleoyl-glycerol (16:1/18:2) [1]*	palmitoleoyl-linoleoyl-glycerol (16:1/18:2) [1]*			HMDB0007132		9543699	Pos Late
100010934	402	54953	208038	Lipid	Diacylglycerol	2907	NAMED	XEQQGHISHUGMIP-WUKNDPDISA-N	CCCCCCCCCCCCCC(OCC(OC(CCCCCCC/C=C/CCCCCCCC)=O)CO)=O	diacylglycerol (14:0/18:1, 16:0/16:1) [1]*	diacylglycerol (14:0/18:1, 16:0/16:1) [1]*						Pos Late
100010935	402	54954	208039	Lipid	Diacylglycerol	2908	NAMED	XITYIRJXXQNQKT-FYWRMAATSA-N	CCCCCCCCCCCCCC(OCC(OC(CCCCCCCCC/C=C/CCCCCC)=O)CO)=O	diacylglycerol (14:0/18:1, 16:0/16:1) [2]*	diacylglycerol (14:0/18:1, 16:0/16:1) [2]*						Pos Late
100010936	402	54960	208045	Lipid	Diacylglycerol	2959	NAMED	LWXLWRXRJKMNLM-XBUMEPTLSA-N	CCCCCCCC/C=C/CCCCCCCC(OCC(OC(CCC/C=C/C/C=C/C/C=C/C/C=C/CCCCC)=O)CO)=O	oleoyl-arachidonoyl-glycerol (18:1/20:4) [1]*	oleoyl-arachidonoyl-glycerol (18:1/20:4) [1]*			HMDB0007228		9543786	Pos Late
100010937	402	54961	208046	Lipid	Diacylglycerol	2960	NAMED	LWXLWRXRJKMNLM-XBUMEPTLSA-N	CCCCCCCC/C=C/CCCCCCCC(OCC(OC(CCC/C=C/C/C=C/C/C=C/C/C=C/CCCCC)=O)CO)=O	oleoyl-arachidonoyl-glycerol (18:1/20:4) [2]*	oleoyl-arachidonoyl-glycerol (18:1/20:4) [2]*			HMDB0007228		9543786	Pos Late
100010939	402	54965	208050	Lipid	Diacylglycerol	2928	NAMED	YFBCIDURFTWKDQ-JNNNPDOGSA-N	CCCCCCCCCCCCCCCC(OCC(OC(CCCC/C=C/C/C=C/C/C=C/CCCCC)=O)CO)=O	palmitoyl-linolenoyl-glycerol (16:0/18:3) [2]*	palmitoyl-linolenoyl-glycerol (16:0/18:3) [2]*			HMDB0007104,HMDB0007105		348277338,348277337	Pos Late
100010940	402	54966	208051	Lipid	Diacylglycerol	2909	NAMED	BHGPPCIWDXQOMA-HZFIRFLSSA-N	CCCCCC/C=C/CCCCCCCC(OCC(OC(CCCCCCC/C=C/C/C=C/CCCCC)=O)CO)=O	diacylglycerol (16:1/18:2 [2], 16:0/18:3 [1])*	diacylglycerol (16:1/18:2 [2], 16:0/18:3 [1])*						Pos Late
100010941	402	54968	208053	Lipid	Diacylglycerol	2951	NAMED	MQGBAQLIFKSMEM-WVZYQCMWSA-N	CCCCC/C=C/C/C=C/CCCCCCCC(OCC(OC(CCCCCCC/C=C/C/C=C/CCCCC)=O)CO)=O	linoleoyl-linoleoyl-glycerol (18:2/18:2) [1]*	linoleoyl-linoleoyl-glycerol (18:2/18:2) [1]*			HMDB0007248		9543729	Pos Late
100010942	402	54969	208054	Lipid	Diacylglycerol	2952	NAMED	MQGBAQLIFKSMEM-WVZYQCMWSA-N	CCCCC/C=C/C/C=C/CCCCCCCC(OCC(OC(CCCCCCC/C=C/C/C=C/CCCCC)=O)CO)=O	linoleoyl-linoleoyl-glycerol (18:2/18:2) [2]*	linoleoyl-linoleoyl-glycerol (18:2/18:2) [2]*			HMDB0007248		9543729	Pos Late
100010949	402	57450	211104	Lipid	Diacylglycerol	2957	NAMED	NSXLMTYRMFVYNT-IOLLQWDPSA-N	CCCCCCCCCCCCCCCCCC(OCC(OC(CCC/C=C/C/C=C/C/C=C/C/C=C/CCCCC)=O)CO)=O	stearoyl-arachidonoyl-glycerol (18:0/20:4) [1]*	stearoyl-arachidonoyl-glycerol (18:0/20:4) [1]*			HMDB0007170	C00165	6438587	Pos Late
100010950	402	57449	211103	Lipid	Diacylglycerol	2958	NAMED	NSXLMTYRMFVYNT-IOLLQWDPSA-N	CCCCCCCCCCCCCCCCCC(OCC(CO)OC(CCC/C=C/C/C=C/C/C=C/C/C=C/CCCCC)=O)=O	stearoyl-arachidonoyl-glycerol (18:0/20:4) [2]*	stearoyl-arachidonoyl-glycerol (18:0/20:4) [2]*			HMDB0007170		6438587	Pos Late
100010951	402	54994	208087	Lipid	Phosphatidylinositol (PI)	2579	NAMED	SHIZRFSRTKXRQL-XBUMEPTLSA-N	CCCCCCCC/C=C/CCCCCCCC(OCC(OC(CCC/C=C/C/C=C/C/C=C/C/C=C/CCCCC)=O)COP(O)(OC1C(O)C(O)C(O)C(O)C1O)=O)=O	1-oleoyl-2-arachidonoyl-GPI (18:1/20:4)*	1-oleoyl-2-arachidonoyl-GPI (18:1/20:4)*						Pos Late
100010955	305	57564	211466	Xenobiotics	Chemical	6222	NAMED	YFSUTJLHUFNCNZ-UHFFFAOYSA-N	O=S(C(F)(F)C(F)(F)C(F)(F)C(F)(F)C(F)(F)C(F)(F)C(F)(F)C(F)(F)F)(O)=O	perfluorooctanesulfonate (PFOS)	perfluorooctanesulfonate (PFOS)	1763-23-1	67068	HMDB0059586	C18142	74483	Polar
100010965	402	55011	208118	Lipid	Phosphatidylcholine (PC)	2369	NAMED	AJYXDMLIYIHUFX-YWNVXTCZSA-N	CCCCCC/C=C/CCCCCCCCCCCC(OC(COP([O-])(OCC[N+](C)(C)C)=O)COC(CCCCCCCCC/C=C/CCCCCC)=O)=O	1-oleoyl-2-eicosenoyl-GPC (18:1/20:1)*	1-oleoyl-2-eicosenoyl-GPC (18:1/20:1)*				C00157		Pos Late
100010966	402	55040	208150	Lipid	Plasmalogen	2808	NAMED	PXPSGTINXJQLBR-VQJSHJPSSA-N	[H][C@](OC(CCCCCCCCCCCCCCCCC)=O)(COP(OCC[N+](C)(C)C)([O-])=O)COCCCCCCCCCCCCCCCC	1-palmityl-2-stearoyl-GPC (O-16:0/18:0)*	1-palmityl-2-stearoyl-GPC (O-16:0/18:0)*		9977836	HMDB0013405		11803170	Pos Late
100015586	402	57332	210830	Lipid	Plasmalogen	2807	NAMED	WOTHHEHCEYHCFE-LDLOPFEMSA-N	[H][C@](OC(CCCCCCCCCCCCCCC)=O)(COP(OCC[N+](C)(C)C)([O-])=O)COCCCCCCCCCCCCCCCC	1-palmityl-2-palmitoyl-GPC (O-16:0/16:0)*	1-palmityl-2-palmitoyl-GPC (O-16:0/16:0)*		128719			145911	Pos Late
100015590	402	57721	213236	Lipid	Plasmalogen	2845	NAMED	LMGTVCKIUNTOEP-HJTCUGKVSA-N	[H][C@](OC(CCCCCCC/C=C\C/C=C\CCCCC)=O)(COP(OCC[N+](C)(C)C)([O-])=O)COCCCCCCCCCCCCCCCCCC	1-stearyl-2-linoleoyl-GPC (O-18:0/18:2)*	1-stearyl-2-linoleoyl-GPC (O-18:0/18:2)*		4947110	HMDB13418		6443070	Pos Late
100015609	402	57416	211068	Lipid	Ceramides	3051	NAMED	XXWRZIYYFPIQHE-XPAOSYCESA-N	[H][C@](NC(CCCCCCCCCCCCCCC)=O)(CO)[C@@](O)([H])/C=C/CCCCCCCC/C=C\CCC	N-palmitoyl-sphingadienine (d18:2/16:0)*	N-palmitoyl-sphingadienine (d18:2/16:0)*			HMDB0240686			Pos Late
100015618	402	57373	210900	Lipid	Diacylglycerol	2936	NAMED	BXVYQJJBMVVALQ-UNMZRDIWSA-N	CCCCCCCCCCCCCCCC(OCC(OC(CC/C=C/C/C=C/C/C=C/C/C=C/C/C=C/C/C=C/CC)=O)CO)=O	palmitoyl-docosahexaenoyl-glycerol (16:0/22:6) [1]*	palmitoyl-docosahexaenoyl-glycerol (16:0/22:6) [1]*			HMDB0007121		9543827	Pos Late
100015622	402	57371	210898	Lipid	Hexosylceramides (HCER)	3081	NAMED	YIGARKIIFOHVPF-YMBRMJIUSA-N	[H][C@](NC(CCCCCCCCCCCCCCCCCCCCC)=O)(CO[C@H]1[C@H](O)[C@@H](O)[C@@H](O)[C@H](O1)CO)[C@@](O)([H])/C=C/CCCCCCCCCCCCC	glycosyl-N-behenoyl-sphingosine (d18:1/22:0)*	glycosyl-N-behenoyl-sphingosine (d18:1/22:0)*		24846901				Pos Late
100015624	402	57372	210899	Lipid	Ceramides	3053	NAMED	HILTUFAERVOALR-MQXYEJFFSA-N	[H][C@](NC(CCCCCCCCCCCCCCCCCCCCC)=O)(CO)[C@@](O)([H])/C=C/CCCCCCCC/C=C\CCC	N-behenoyl-sphingadienine (d18:2/22:0)*	N-behenoyl-sphingadienine (d18:2/22:0)*						Pos Late
100015637	209	57663	212725	Lipid	Fatty Acid, Monohydroxy	1992	NAMED	RPGJJWLCCOPDAZ-UHFFFAOYSA-N	CCCCCCCCCCCCCCCCCCCCC(O)C(O)=O	2-hydroxybehenate	2-hydroxybehenate		167899	HMDB0061660		193484	Neg
100015643	402	57426	211079	Lipid	Sphingolipid Synthesis	3022	NAMED	KWDXKYNWAKMLKK-YQMRQDNGSA-N	OC(/C=C/CCCCCCCC/C=C\CCC)C(CO)N([H])[H]	sphingadienine	sphingadienine	25696-03-1	4952479			6449795	Pos Late
100015666	400	57404	211020	Lipid	Phospholipid Metabolism	2259	NAMED	ZWZWYGMENQVNFU-AKGZTFGVSA-N	OC([C@@H](N)COP(OCC(CO)O)(O)=O)=O	glycerophosphoserine*	glycerophosphoserine*		2339060			3081457	Pos Early
100015681	402	57406	211055	Lipid	Diacylglycerol	2935	NAMED	IVRNQYIPGILFPZ-NKFLWTETSA-N	OCC(OC(CCC/C=C\C/C=C\C/C=C\C/C=C\CCCCC)=O)COC(CCCCCCC/C=C\CCCCCC)=O	palmitoleoyl-arachidonoyl-glycerol (16:1/20:4) [2]*	palmitoleoyl-arachidonoyl-glycerol (16:1/20:4) [2]*						Pos Late
100015689	402	57415	211066	Lipid	Phosphatidylcholine (PC)	2305	NAMED	QAPGDFJIZLYEBT-DYMXKLMASA-N	O=C(CCCCCCCCCCCCCCC)OCC(COP(OCC[N+](C)(C)C)([O-])=O)OC(C(O)CCCCCC/C=C\C/C=C\CCCCC)=O	1-palmitoyl-2-(hydroxylinoleoyl)-GPC (16:0/18:2(OH))*	1-palmitoyl-2-(hydroxylinoleoyl)-GPC (16:0/18:2(OH))*						Pos Late
100015723	402	57428	211081	Lipid	Sphingosines	3188	NAMED	BTUSGZZCQZACPT-YYZTVXDQSA-N	OC[C@H](N)[C@H](O)/C=C/CCCCCCCCCCC	hexadecasphingosine (d16:1)*	hexadecasphingosine (d16:1)*		28533427			14767871	Pos Late
100015727	402	57437	211091	Lipid	Ceramides	3071	NAMED	ODRVSCJZSDNQBP-LMGPGFSZSA-N	OC(/C=C/CCCCCCCCCCC)C(CO)NC(CCCCCCCCCCCCC/C=C\CCCCCCCC)=O	ceramide (d16:1/24:1, d18:1/22:1)*	ceramide (d16:1/24:1, d18:1/22:1)*						Pos Late
100015730	402	57457	211111	Lipid	Hexosylceramides (HCER)	3101	NAMED	PGPGBBSNMWQXTA-LMGPGFSZSA-N	OC(/C=C/CCCCCCCCCCC)C(COC1C(O)C(O)C(O)C(CO)O1)NC(CCCCCCCCCCCCC/C=C\CCCCCCCC)=O	glycosyl ceramide (d16:1/24:1, d18:1/22:1)*	glycosyl ceramide (d16:1/24:1, d18:1/22:1)*						Pos Late
100015744	402	57443	211097	Lipid	Ceramides	3072	NAMED	QMVWGDBKESWTON-OQKRWUNJSA-N	CCCCCCCCCCCCC/C=C/C(O)C(NC(CCC/C=C/CC/C=C/CCCCCCCCCCCCCC)=O)CO	ceramide (d18:2/24:1, d18:1/24:2)*	ceramide (d18:2/24:1, d18:1/24:2)*			HMDB0240679,HMDB0240680			Pos Late
100015745	402	57453	211107	Lipid	Hexosylceramides (HCER)	3103	NAMED	WYTRSDHGWSSQLK-PCKKJQKNSA-N	OC(/C=C/CCCCCCCC/C=C\CCC)C(COC1C(O)C(O)C(O)C(CO)O1)NC(CCCCCCCCCCCCC/C=C\CCCCCCCC)=O	glycosyl ceramide (d18:2/24:1, d18:1/24:2)*	glycosyl ceramide (d18:2/24:1, d18:1/24:2)*						Pos Late
100015751	402	57448	211102	Lipid	Hexosylceramides (HCER)	3102	NAMED	ZTXYYHYUNQRYIR-BLIGVESQSA-N	CCCCCCCCCCCCC/C=C/C(O)C(NC(CCCCCCCCC/C=C/CCCCCCCCCCC)=O)COC1OC(CO)C(O)C(O)C1O	glycosyl ceramide (d18:1/23:1, d17:1/24:1)*	glycosyl ceramide (d18:1/23:1, d17:1/24:1)*						Pos Late
100015755	402	57440	211094	Lipid	Ceramides	3070	NAMED	XWBWIAOWSABHFI-QOSDPKFLSA-N	OC(/C=C/CCCCCCCCCCCCC)C(CO)NC(CCCCCCCCCCCCCCCCCCC)=O	ceramide (d18:1/20:0, d16:1/22:0, d20:1/18:0)*	ceramide (d18:1/20:0, d16:1/22:0, d20:1/18:0)*			HMDB0240684,HMDB0240682,HMDB0004951			Pos Late
100015759	402	57464	211120	Lipid	Fatty Acid Metabolism (Acyl Choline)	1968	NAMED	WYVHUXGFCVDOEA-UHFFFAOYSA-N	C[N+](C)(C)C[CH-]OC(CCCCCCCCCCCCCCCCC)=O	stearoylcholine*	stearoylcholine*			HMDB0240648		90111	Pos Late
100015760	402	57463	211119	Lipid	Fatty Acid Metabolism (Acyl Choline)	1966	NAMED	GVYIAXNFCSAJSK-OKLKQMLOSA-N	C[N+](C)(C)C[CH-]OC(CCCCCCC/C=C/C/C=C/CCCCC)=O	linoleoylcholine*	linoleoylcholine*			HMDB0013213		53481656	Pos Late
100015762	209	57467	211123	Lipid	Long Chain Polyunsaturated Fatty Acid (n3 and n6)	1592	NAMED	RILVNGKQIULBOQ-YHTMAJSVSA-N	CCCCC/C=C/C/C=C/C/C=C/CCCCCCCCC(O)=O	docosatrienoate (22:3n6)*	docosatrienoate (22:3n6)*					75955220	Neg
100015785	209	57810	213739	Lipid	Long Chain Polyunsaturated Fatty Acid (n3 and n6)	1583	NAMED	YHGJECVSSKXFCJ-KUBAVDMBSA-N	OC(CCCC/C=C\C/C=C\C/C=C\C/C=C\C/C=C\C/C=C\CC)=O	nisinate (24:6n3)	nisinate (24:6n3)	68378-49-4	9967286	HMDB0013025		11792612	Neg
100015787	402	57475	211138	Lipid	Sphingomyelins	3141	NAMED	HAFQHLHNPJDAGB-MAJDXUCPSA-N	CCCCCCCCCCCCCCCCCCC(N[C@H]([C@H](O)/C=C/CCCCCCCCCCCCC)COP([O-])(OCC[N+](C)(C)C)=O)=O	sphingomyelin (d18:1/19:0, d19:1/18:0)*	sphingomyelin (d18:1/19:0, d19:1/18:0)*						Pos Late
100015788	402	57474	211137	Lipid	Sphingomyelins	3130	NAMED	YMTVMVYOUDDTQJ-UOMMIRHQSA-N	[H][C@](NC(CCCCCCC/C=C\CCCCCCCC)=O)(COP(OCC[N+](C)(C)C)([O-])=O)[C@@](O)([H])/C=C/CCCCCCCC/C=C\CCC	sphingomyelin (d18:2/18:1)*	sphingomyelin (d18:2/18:1)*			HMDB0001348		52931155	Pos Late
100015789	402	57479	211142	Lipid	Sphingomyelins	3132	NAMED	ZLNGRWIWHFFRNK-UKCALJHFSA-N	CCC/C=C/CCCCCCCC/C=C/[C@@H](O)[C@@H](NC(CCCCCCCCCCCCCCCC/C=C/C/C=C/CC)=O)COP([O-])(OCC[N+](C)(C)C)=O	sphingomyelin (d18:2/24:2)*	sphingomyelin (d18:2/24:2)*			HMDB0240644			Pos Late
100015790	402	57480	211143	Lipid	Sphingomyelins	3146	NAMED	SDUGEKJCGFHJRC-GKPQAQNZSA-N	CCC/C=C/CCCCCCCC/C=C/[C@@H](O)[C@@H](NC(CCCCCCCCCCCCCCCCCCCC)=O)COP([O-])(OCC[N+](C)(C)C)=O	sphingomyelin (d18:2/21:0, d16:2/23:0)*	sphingomyelin (d18:2/21:0, d16:2/23:0)*			HMDB0240676			Pos Late
100015791	402	57482	211145	Lipid	Sphingomyelins	3131	NAMED	FEKSRDMVIULIDJ-SQPFVDNVSA-N	CCC/C=C/CCCCCCCC/C=C/[C@@H](O)[C@@H](NC(CCCCCCCCCCCCCCCCC/C=C/CCC)=O)COP([O-])(OCC[N+](C)(C)C)=O	sphingomyelin (d18:2/23:1)*	sphingomyelin (d18:2/23:1)*			HMDB0240668			Pos Late
100015792	402	57478	211141	Lipid	Sphingomyelins	3152	NAMED	JONXXLXMISNQNG-BXMSAMRLSA-N	[H][C@](NC(CCCCCCCCCCCCCCCCCCCCCCCC)=O)(COP(OCC[N+](C)(C)C)([O-])=O)[C@@](O)([H])/C=C/CCCCCCCCCCCCC	sphingomyelin (d18:1/25:0, d19:0/24:1, d20:1/23:0, d19:1/24:0)*	sphingomyelin (d18:1/25:0, d19:0/24:1, d20:1/23:0, d19:1/24:0)*		24846885	HMDB0240675,HMDB0240674,HMDB0240673,HMDB0240671			Pos Late
100015793	402	57483	211146	Lipid	Sphingomyelins	3137	NAMED	YHBBZTIPONDTRX-TVUHHANTSA-N	[H][C@](NC(CCCCCCCCCCCCCC)=O)(COP(OCC[N+](C)(C)C)([O-])=O)[C@@](O)([H])/C=C/CCCCCCCC/C=C\CCC	sphingomyelin (d17:2/16:0, d18:2/15:0)*	sphingomyelin (d17:2/16:0, d18:2/15:0)*			HMDB0240677			Pos Late
100015831	402	57511	211212	Lipid	Fatty Acid Metabolism (Acyl Carnitine, Polyunsaturated)	1910	NAMED	WJCRATGUUISKDG-QNEBEIHSSA-N	O=C(OC(C[N+](C)(C)C)CC([O-])=O)CCCCCCC/C=C\C/C=C\C/C=C\CC	linolenoylcarnitine (C18:3)*	linolenoylcarnitine (C18:3)*						Pos Late
100015832	402	57514	211215	Lipid	Fatty Acid Metabolism (Acyl Carnitine, Long Chain Saturated)	1886	NAMED	IUMXSSOVGPXXJL-UHFFFAOYSA-N	O=C(OC(C[N+](C)(C)C)CC([O-])=O)CCCCCCCCCCCCCCCCCCCCC	behenoylcarnitine (C22)*	behenoylcarnitine (C22)*		28639204	HMDB0062468		71464577	Pos Late
100015833	402	57513	211214	Lipid	Fatty Acid Metabolism (Acyl Carnitine, Long Chain Saturated)	1885	NAMED	SVJLJQBGUITFLI-UHFFFAOYSA-N	O=C(OC(C[N+](C)(C)C)CC([O-])=O)CCCCCCCCCCCCCCCCCCC	arachidoylcarnitine (C20)*	arachidoylcarnitine (C20)*		28639199	HMDB0006460		53477833	Pos Late
100015834	402	57515	211216	Lipid	Fatty Acid Metabolism (Acyl Carnitine, Long Chain Saturated)	1887	NAMED	YDUFZFUYBBPVLJ-UHFFFAOYSA-N	O=C(CCCCCCCCCCCCCCCCCCCCCCC)OC(C[N+](C)(C)C)CC([O-])=O	lignoceroylcarnitine (C24)*	lignoceroylcarnitine (C24)*			HMDB0240665			Pos Late
100015837	402	57518	211219	Lipid	Fatty Acid Metabolism (Acyl Carnitine, Polyunsaturated)	1912	NAMED	RBFQHRALHSUPIA-SNPVRQPZSA-N	CCCCC/C=C\C/C=C\C/C=C\C/C=C\CCCC(OC(C[N+](C)(C)C)CC([O-])=O)=O	arachidonoylcarnitine (C20:4)	arachidonoylcarnitine (C20:4)			HMDB0006455		136212424	Pos Late
100015838	402	57519	211220	Lipid	Fatty Acid Metabolism (Acyl Carnitine, Monounsaturated)	1905	NAMED	PVOQPLSKYNZHOT-OUKQBFOZSA-N	O=C(OC(CC([O-])=O)C[N+](C)(C)C)CCCCCCCCC/C=C/CCCCCCCC	eicosenoylcarnitine (C20:1)*	eicosenoylcarnitine (C20:1)*						Pos Late
100015839	402	57520	211221	Lipid	Fatty Acid Metabolism (Acyl Carnitine, Polyunsaturated)	1911	NAMED	OLZWDVKTOGTVLC-UTJQPWESSA-N	O=C(CCCCCCCCC/C=C\C/C=C\CCCCC)OC(C[N+](C)(C)C)CC([O-])=O	dihomo-linoleoylcarnitine (C20:2)*	dihomo-linoleoylcarnitine (C20:2)*						Pos Late
100015840	402	57521	211222	Lipid	Fatty Acid Metabolism (Acyl Carnitine, Polyunsaturated)	1913	NAMED	RDIZZXFTCZPSRY-WYTUUNCASA-N	O=C(CCCCCC/C=C/C/C=C/C/C=C/CCCCC)OC(CC([O-])=O)C[N+](C)(C)C	dihomo-linolenoylcarnitine (C20:3n3 or 6)*	dihomo-linolenoylcarnitine (C20:3n3 or 6)*						Pos Late
100015841	402	57525	211226	Lipid	Fatty Acid Metabolism (Acyl Carnitine, Monounsaturated)	1906	NAMED	WDWXOVLPQSTGNY-SEYXRHQNSA-N	O=C(CCCCCCCCCCC/C=C\CCCCCCCC)OC(CC([O-])=O)C[N+](C)(C)C	erucoylcarnitine (C22:1)*	erucoylcarnitine (C22:1)*						Pos Late
100015842	402	57522	211223	Lipid	Fatty Acid Metabolism (Acyl Carnitine, Long Chain Saturated)	1881	NAMED	MDDWQHVKSHTZTD-UHFFFAOYSA-N	O=C(CCCCCCCCCCCCCC)OC(C[N+](C)(C)C)CC([O-])=O	pentadecanoylcarnitine (C15)*	pentadecanoylcarnitine (C15)*			HMDB0062517		123132011	Pos Late
100015845	402	57523	211224	Lipid	Fatty Acid Metabolism (Acyl Carnitine, Polyunsaturated)	1920	NAMED	WLLMYDQRCSWAST-WSDBEMKQSA-N	O=C(CC/C=C\C/C=C\C/C=C\C/C=C\C/C=C\C/C=C\CC)OC(C[N+](C)(C)C)CC([O-])=O	docosahexaenoylcarnitine (C22:6)*	docosahexaenoylcarnitine (C22:6)*						Pos Late
100015846	402	57531	211232	Lipid	Fatty Acid Metabolism (Acyl Carnitine, Monounsaturated)	1907	NAMED	QGIHQXKFCAACHN-SEYXRHQNSA-N	O=C(CCCCCCCCCCCCC/C=C\CCCCCCCC)OC(C[N+](C)(C)C)CC([O-])=O	nervonoylcarnitine (C24:1)*	nervonoylcarnitine (C24:1)*			HMDB0006509			Pos Late
100015850	402	57528	211229	Lipid	Fatty Acid Metabolism (Acyl Carnitine, Polyunsaturated)	1917	NAMED	OLORTLVEDIELGC-SNPVRQPZSA-N	O=C(OC(CC([O-])=O)C[N+](C)(C)C)CCCCC/C=C\C/C=C\C/C=C\C/C=C\CCCCC	adrenoylcarnitine (C22:4)*	adrenoylcarnitine (C22:4)*						Pos Late
100015851	402	57529	211230	Lipid	Fatty Acid Metabolism (Acyl Carnitine, Polyunsaturated)	1918	NAMED	MJPIXACTUMSGGI-WMPRHZDHSA-N	O=C(OC(CC([O-])=O)C[N+](C)(C)C)CCCCC/C=C\C/C=C\C/C=C\C/C=C\C/C=C\CC	docosapentaenoylcarnitine (C22:5n3)*	docosapentaenoylcarnitine (C22:5n3)*					71464594	Pos Late
100015882	402	57595	212143	Lipid	Hexosylceramides (HCER)	3099	NAMED	FXNTXJCUSRJUFN-QOSDPKFLSA-N	OCC(NC(CCCCCCCCCCCCCCCCCCC)=O)C(OC1OC(CO)C(O)C(O)C1O)/C=C/CCCCCCCCCCCCC	glycosyl ceramide (d18:1/20:0, d16:1/22:0)*	glycosyl ceramide (d18:1/20:0, d16:1/22:0)*						Pos Late
100015962	400	57687	213101	Amino Acid	Lysine Metabolism	140	NAMED	CDLVFVFTRQPQFU-UHFFFAOYSA-N	C[N+](C)(C)CCCCC([O-])=O	N,N,N-trimethyl-5-aminovalerate	N,N,N-trimethyl-5-aminovalerate		34236878			14274897	Pos Early
100015965	400	63152	221889	Xenobiotics	Food Component/Plant	5113	NAMED	WYUFTYLVLQZQNH-UHFFFAOYSA-N	CCOC1C(O)C(O)C(O)C(CO)O1	ethyl alpha-glucopyranoside	ethyl alpha-glucopyranoside	34625-23-5	378664	HMDB0029968		11127487	Pos Early
100016038	400	57814	213597	Amino Acid	Polyamine Metabolism	558	NAMED	MQTAVJHICJWXBR-UHFFFAOYSA-N	CC(NCCCNCCCCN)=O	(N(1) + N(8))-acetylspermidine	(N(1) + N(8))-acetylspermidine			HMDB0002189,HMDB0001276	C01029,C00612	496,123689	Pos Early
100016063	400	61779	218152	Lipid	Fatty Acid Metabolism (Acyl Carnitine, Short Chain)	1860	NAMED	GCKJJXWIYAKHOA-LLVKDONJSA-N	CC(CCC(O[C@@H](C[N+](C)(C)C)CC([O-])=O)=O)C	isocaproylcarnitine	isocaproylcarnitine						Pos Early
100016069	402	61769	218137	Lipid	Fatty Acid Metabolism (Acyl Carnitine, Monounsaturated)	1900	NAMED	PETYOUXDCHQKTQ-QXPKXGMISA-N	CCCCCC/C=C\CCCC(O[C@@H](C[N+](C)(C)C)CC([O-])=O)=O	5-dodecenoylcarnitine (C12:1)	5-dodecenoylcarnitine (C12:1)			HMDB13326		91825571	Pos Late
100016110	209	61785	218163	Lipid	Fatty Acid Metabolism (Acyl Glycine)	1846	NAMED	WWJXRJJBIVSSNF-NSCUHMNNSA-N	OC(CN([H])C(/C=C/C)=O)=O	2-butenoylglycine	2-butenoylglycine	71428-89-2	4877902			6303498	Neg
100019761	402	62881	220726	Lipid	Dihydroceramides	3031	NAMED	IVBULNXGVIHEKN-MVIDNBQJSA-N	CCCCCCCCCCCCCC[C@@H](O)[C@H]([C@@H](NC(CCCCCCCCCCCCCCC)=O)CO)O	N-palmitoyl-phytosphingosine (t18:0/16:0)	N-palmitoyl-phytosphingosine (t18:0/16:0)		8682389	HMDB0010697		10506988	Pos Late
100019800	402	61839	218537	Lipid	Fatty Acid Metabolism (Acyl Carnitine, Hydroxy)	1946	NAMED	MHJOYNGEDDXLLU-UHFFFAOYSA-N	CCCCCCCCCCCCCC(O)CC(OC([N+](C)(C)C)CCC([O-])=O)=O	3-hydroxypalmitoylcarnitine	3-hydroxypalmitoylcarnitine			HMDB0013336		126456228	Pos Late
100019801	402	61840	218539	Lipid	Fatty Acid Metabolism (Acyl Carnitine, Hydroxy)	1947	NAMED	YBCVTTMMURGSEY-LMLDZDDJSA-N	CCCCCCCC/C=C\CCCCCC(O)CC(O[C@@H](C[N+](C)(C)C)CC([O-])=O)=O	3-hydroxyoleoylcarnitine	3-hydroxyoleoylcarnitine		48061587			129637446	Pos Late
100019816	209	61789	218169	Lipid	Fatty Acid Metabolism (Acyl Glycine)	1819	NAMED	BQIHXZIDVMRVRP-UHFFFAOYSA-N	CC(CCC(NCC(O)=O)=O)C	isocaproylglycine	isocaproylglycine		24689758			28777652	Neg
100019884	209	61798	218189	Lipid	Fatty Acid Metabolism (Acyl Glycine)	1829	NAMED	AAPHATPOQGNLOZ-SNAWJCMRSA-N	CCC/C=C/C(NCC(O)=O)=O	trans-2-hexenoylglycine	trans-2-hexenoylglycine		25033670				Neg
100019892	209	61700	218003	Lipid	Fatty Acid, Monohydroxy	1991	NAMED	CPLYLXYEVLGWFJ-UHFFFAOYSA-N	CCCCCCCCCCCCCCCCCCC(O)C(O)=O	2-hydroxyarachidate*	2-hydroxyarachidate*		4395406			5225199	Neg
100019953	209	62781	220394	Lipid	Fatty Acid, Branched	1671	NAMED	UCDAVJCKGYOYNI-UHFFFAOYSA-N	OC(CCCCCCCCCCCCCCCCC(C)C)=O	18-methylnonadecanoate (i20:0)	18-methylnonadecanoate (i20:0)		3584985			4383090	Neg
100019966	209	61843	218451	Lipid	Fatty Acid, Monohydroxy	2008	NAMED	MFBDGGFIQVOLTJ-MDZDMXLPSA-N	CCCCCCCC/C=C/CCCCCC(O)CC(O)=O	3-hydroxyoleate*	3-hydroxyoleate*						Neg
100019968	305	61858	218556	Carbohydrate	Pentose Metabolism	1307	NAMED	QXKAIJAYHKCRRA-PZGQECOJSA-N	OC[C@H](O)[C@@H](O)[C@@H](O)C(O)=O	lyxonate	lyxonate			HMDB0060255			Polar
100019969	209	62869	220659	Lipid	Fatty Acid, Dicarboxylate	1715	NAMED	QCNWZROVPSVEJA-UHFFFAOYSA-N	OC(CCCCCCCCCCCCCCCC(O)=O)=O	heptadecanedioate (C17-DC)	heptadecanedioate (C17-DC)	2424-90-0	2340922			3083765	Neg
100019970	209	62867	220657	Lipid	Fatty Acid, Dicarboxylate	1719	NAMED	IFAWYXIHOVRGHQ-UHFFFAOYSA-N	O=C(O)CCCCCCCCCCCCCCCCCC(O)=O	nonadecanedioate (C19-DC)	nonadecanedioate (C19-DC)	6250-70-0	11395055			12572015	Neg
100019972	209	61864	218581	Lipid	Fatty Acid, Dicarboxylate	1706	NAMED	OHCMUMNQAHNIEP-HNQUOIGGSA-N	OC(CCC/C=C/CCCCCC(O)=O)=O	dodecenedioate (C12:1-DC)*	dodecenedioate (C12:1-DC)*			HMDB0000933		5283028	Neg
100019975	209	61862	218579	Lipid	Fatty Acid, Dicarboxylate	1714	NAMED	IWTMSCUHCJHPPR-ACCUITESSA-N	O=C(O)CCCCCCCCCCCC/C=C/C(O)=O	hexadecenedioate (C16:1-DC)*	hexadecenedioate (C16:1-DC)*						Neg
100019978	209	61861	218578	Lipid	Fatty Acid, Dicarboxylate	1717	NAMED	YDPSQMGOAILWPE-FYWRMAATSA-N	O=C(O)CCCCCCCCCCCCCC/C=C/C(O)=O	octadecenedioate (C18:1-DC)	octadecenedioate (C18:1-DC)					9543674	Neg
100019982	209	61860	218580	Lipid	Fatty Acid, Dicarboxylate	1718	NAMED	ZKQNWTGXRAIVGG-PXELCPQFSA-N	O=C(O)CCCCCCCCCCCC/C=C/C=C/C(O)=O	octadecadienedioate (C18:2-DC)*	octadecadienedioate (C18:2-DC)*						Neg
100020006	209	61873	218623	Xenobiotics	Chemical	6205	NAMED	SBYDEYGHJXSIDV-UHFFFAOYSA-N	CC1=C(OS(=O)(O)=O)C=CC2=CC=CC=C21	methylnaphthyl sulfate (2)*	methylnaphthyl sulfate (2)*						Neg
100020204	209	62059	218862	Lipid	Fatty Acid, Amino	1774	NAMED	JJGNMSOJTSABGA-UHFFFAOYSA-N	OC(C(CCCCCC)N([H])C(C)=O)=O	N-acetyl-2-aminooctanoate*	N-acetyl-2-aminooctanoate*		86248	HMDB0059745		95555	Neg
100020205	400	62060	218876	Amino Acid	Alanine and Aspartate Metabolism	43	NAMED	ZBYVTTSIVDYQSO-REOHCLBHSA-N	O=C(O)[C@@H](N)CC(NO)=O	hydroxyasparagine**	hydroxyasparagine**		88149	HMDB32332	C20631	15991574	Pos Early
100020206	209	62070	218879	Xenobiotics	Food Component/Plant	4895	NAMED	MMIBOZXVZLENRZ-ZFORQUDYSA-N	O=C1c2c(OC=C1c3ccc(O)cc3)cc(O[C@@H]4O[C@@H]([C@H]([C@@H]([C@H]4O)O)O)C(O)=O)cc2	daidzein 7-O-glucuronide	daidzein 7-O-glucuronide		9491321	HMDB41718		11316354	Neg
100020207	209	62061	218865	Xenobiotics	Food Component/Plant	4897	NAMED	DKEIWIJUHWVGRC-UHFFFAOYSA-N	O=C1C(C(O)=C2)=C(C=C2OS(=O)(O)=O)OC=C1C(C=C3)=CC=C3O	genistein sulfate*	genistein sulfate*						Neg
100020211	400	62064	218870	Lipid	Fatty Acid Metabolism (Acyl Glycine)	1849	NAMED	VMIWHQCIHIUYCS-UHFFFAOYSA-N	O=C(CC(O)C)NCC(O)=O	3-hydroxybutyroylglycine**	3-hydroxybutyroylglycine**						Pos Early
100020214	209	62066	218872	Lipid	Primary Bile Acid Metabolism	3490	NAMED	ZQYUKJFJPJDMMR-PRRFOZOMSA-N	CC(C1CCC2C3[C@H]([C@H]([C@@]4(C[C@@H](CC[C@@]4(C3CC[C@]12C)C)O)[H])O)O)CCC(NCC(O)=O)=O	glyco-beta-muricholate**	glyco-beta-muricholate**						Neg
100020216	209	62063	218867	Xenobiotics	Food Component/Plant	4714	NAMED	JIVINIISUDEORF-UHFFFAOYSA-N	O=C1C(C(O)=C2)=C(C=C2OC3OC(C(O)=O)C(O)C(O)C3O)OC=C1C(C=C4)=CC=C4O	genistein glucuronide*	genistein glucuronide*						Neg
100020217	400	62947	220818	Amino Acid	Urea cycle; Arginine and Proline Metabolism	526	NAMED	KXONJPJIFNGMCN-UHFFFAOYSA-N	O=C(C([N+](C)(C)C)C)N1CCCC1C([O-])=O	N,N,N-trimethyl-alanylproline betaine (TMAP)	N,N,N-trimethyl-alanylproline betaine (TMAP)			HMDB0240365			Pos Early
100020219	209	62863	220649	Xenobiotics	Food Component/Plant	4808	NAMED	OLNJUISKUQQNIM-UHFFFAOYSA-N	O=CC1=CNC2=CC=CC=C12	3-formylindole	3-formylindole	487-89-8	9838	HMDB29737	C08493	10256	Neg
100020241	400	62104	218950	Peptide	Gamma-glutamyl Amino Acid	665	NAMED	SCTJBDDLOROJJM-UHFFFAOYSA-N	NC(C(O)=O)CCC(NC(CCCNC(N)=O)C(O)=O)=O	gamma-glutamylcitrulline*	gamma-glutamylcitrulline*						Pos Early
100020272	209	62857	220633	Xenobiotics	Food Component/Plant	4903	NAMED	UMCDODPBPQMWQP-UHFFFAOYSA-N	COC1=C(OS(=O)(O)=O)C=CC(CCC(O)=O)=C1	dihydroferulic acid sulfate	dihydroferulic acid sulfate		162994	HMDB0041724		187489	Neg
100020276	402	62152	219058	Lipid	Sphingomyelins	3133	NAMED	VDFACZRLDXDTEB-WSYRTZMQSA-N	CCCCCCCCCCC/C=C/[C@@H](O)[C@@H](NC(CCCCCCCCCCCCCC)=O)COP(OCC[N+](C)(C)C)([O-])=O	sphingomyelin (d17:1/14:0, d16:1/15:0)*	sphingomyelin (d17:1/14:0, d16:1/15:0)*						Pos Late
100020343	209	62850	220619	Lipid	Long Chain Polyunsaturated Fatty Acid (n3 and n6)	1568	NAMED	HXHZGHRLVRFQDR-HZJYTTRNSA-N	OC(CCC/C=C\C/C=C\CCCCC)=O	tetradecadienoate (14:2)*	tetradecadienoate (14:2)*	39039-37-7	4471834	HMDB0000560		5312409	Neg
100020361	400	62853	220624	Amino Acid	Urea cycle; Arginine and Proline Metabolism	496	NAMED	YCCMTCQQDULIFE-UHFFFAOYSA-N	NC1CCCNC1=O	3-amino-2-piperidone	3-amino-2-piperidone	1892-22-4	4371576	HMDB0000323		5200225	Pos Early
100020371	400	63151	221884	Amino Acid	Alanine and Aspartate Metabolism	33	NAMED	QCYOIFVBYZNUNW-BYPYZUCNSA-N	C[C@@](C(O)=O)(N(C)C)[H]	N,N-dimethylalanine	N,N-dimethylalanine	2812-31-9	4589713			5488191	Pos Early
100020372	209	63583	222852	Xenobiotics	Food Component/Plant	5238	NAMED	DWLVFWDCSFTDOD-UHFFFAOYSA-N	OC(C(C1=CNC2=C1C=CC=C2)=O)=O	3-indoleglyoxylic acid	3-indoleglyoxylic acid	1477-49-2	66497			73863	Neg
100020377	209	64131	233912	Xenobiotics	Food Component/Plant	5248	NAMED	WYUFTYLVLQZQNH-JAJWTYFOSA-N	O[C@H]([C@H]1O)[C@@H]([C@@H](CO)O[C@H]1OCC)O	ethyl beta-glucopyranoside	ethyl beta-glucopyranoside		108559	HMDB0029968		121667	Neg
100020407	209	64041	233186	Xenobiotics	Food Component/Plant	4911	NAMED	CGSFDOCYHBJLFW-WMLDXEAASA-N	O=C([C@@]1(CC2=CC(OS(=O)(O)=O)=CC=C2)[H])OC[C@@]1(CC3=CC(O)=CC=C3)[H]	enterolactone sulfate	enterolactone sulfate			HMDB0240506,HMDB0240505			Neg
100020409	305	63687	223113	Cofactors and Vitamins	Ascorbate and Aldarate Metabolism	4371	NAMED	FBFZPSQPKNIVMT-ZAFYKAAXSA-N	O=C1O[C@@]([C@@H](O)CO)([H])C(OS(=O)(O)=O)=C1O	ascorbic acid 3-sulfate*	ascorbic acid 3-sulfate*		9600241			11425365	Polar
100020417	400	62862	220645	Amino Acid	Lysine Metabolism	117	NAMED	XXEWFEBMSGLYBY-ZETCQYMHSA-N	OC([C@@H](N)CCCCN(C)C)=O	N6,N6-dimethyllysine	N6,N6-dimethyllysine	2259-86-1	167778	HMDB0013287	C05545	193344	Pos Early
100020478	209	62276	219247	Lipid	Fatty Acid, Dicarboxylate	1707	NAMED	QHRHXXRXWDTFLI-HZJYTTRNSA-N	CCCCC/C=C\C/C=C\CC(O)=O	dodecadienoate (12:2)*	dodecadienoate (12:2)*					25480	Neg
100020487	400	62309	219289	Amino Acid	Polyamine Metabolism	552	NAMED	YGIAGXACEXFIDU-UHFFFAOYSA-N	O=C(C)NCCCNCCCC(O)=O	N-acetyl-isoputreanine	N-acetyl-isoputreanine					131802901	Pos Early
100020513	400	62707	220221	Amino Acid	Urea cycle; Arginine and Proline Metabolism	532	NAMED	NUZAZRCJSJHGCC-ZETCQYMHSA-N	OC([C@H](CCCCNC(N)=O)NC(C)=O)=O	N-acetylhomocitrulline	N-acetylhomocitrulline						Pos Early
100020515	209	62520	219835	Xenobiotics	Chemical	6207	NAMED	HXEZIDSFDHEIIQ-UHFFFAOYSA-N	O=S(OC1=CC=C(C=CC=C2)C2=C1)(O)=O	2-naphthol sulfate	2-naphthol sulfate		67020			74428	Neg
100020536	209	63072	221702	Xenobiotics	Benzoate Metabolism	4527	NAMED	KHZCNGJFSKSSIJ-UHFFFAOYSA-N	OC1=CC=C(CC)C=C1OS(=O)(O)=O	4-ethylcatechol sulfate	4-ethylcatechol sulfate						Neg
100020545	400	63254	222161	Amino Acid	Lysine Metabolism	112	NAMED	UNPVIYLDJYPILW-VIFPVBQESA-N	OC([C@@H](NC(C)=O)CCCCN(C)C)=O	N2-acetyl,N6,N6-dimethyllysine	N2-acetyl,N6,N6-dimethyllysine						Pos Early
100020578	209	63597	222898	Xenobiotics	Benzoate Metabolism	4529	NAMED	USWXDXYEVISELK-UHFFFAOYSA-N	OS(OC1=CC=C(CC=C)C=C1O)(=O)=O	4-allylcatechol sulfate	4-allylcatechol sulfate						Neg
100020632	209	62736	220263	Lipid	Fatty Acid Metabolism (Acyl Glycine)	1827	NAMED	HIJVCBKKIBVNPO-UHFFFAOYSA-N	CCC(C)CCC(NCC(O)=O)=O	4-methylhexanoylglycine	4-methylhexanoylglycine						Neg
100020633	209	64388	237464	Lipid	Fatty Acid Metabolism (Acyl Glycine)	1836	NAMED	JJDLEDDIIQOUSW-UHFFFAOYSA-N	O=C(NCC(O)=O)CC(O)CCCCC	3-hydroxyoctanoylglycine	3-hydroxyoctanoylglycine						Neg
100020743	402	62429	219596	Lipid	Lysophospholipid	2640	NAMED	UEORCJDSHVBFKT-HTOVTZSWSA-N	O=C(CCCCCCCC/C=C\CCCCCCCC)OC[C@]([H])(COP(OCC[N+](C)(C)C)([O-])=O)O	1-nonadecenoyl-GPC (19:1)*	1-nonadecenoyl-GPC (19:1)*						Pos Late
100020749	402	62435	219619	Lipid	Phosphatidylinositol (PI)	2562	NAMED	BSTMJEKBGMABBW-SVOBYVNYSA-N	OC1[C@H](OP(OC[C@@](OC(CCC/C=C\C/C=C\C/C=C\CCCCCCCC)=O)([H])COC(CCCCCCCCCCCCCCCCC)=O)(O)=O)C(O)[C@H](O)C(O)C1O	1-stearoyl-2-meadoyl-GPI (18:0/20:3n9)*	1-stearoyl-2-meadoyl-GPI (18:0/20:3n9)*		24767698	HMDB0009813			Pos Late
100020769	209	62449	219679	Lipid	Monoacylglycerol	2897	NAMED	KRUXHXDPFZXFJX-FPLPWBNLSA-N	CCCCCC/C=C\CCCCCCCCC(OCC(O)CO)=O	1-heptadecenoylglycerol (17:1)*	1-heptadecenoylglycerol (17:1)*		58191491				Neg
100020822	305	62524	219858	Xenobiotics	Food Component/Plant	4857	NAMED	WEPNMLSXEATIJK-UHFFFAOYSA-N	OC1=CC(CCC(O)=O)=CC=C1OS(O)(=O)=O	dihydrocaffeate sulfate (2)	dihydrocaffeate sulfate (2)						Polar
100020825	400	62557	219908	Lipid	Fatty Acid Metabolism (Acyl Carnitine, Hydroxy)	1939	NAMED	VYEONLJQPYRKAN-UHFFFAOYSA-N	C[N+](C)(C)CC(OC(CC(O)CCC)=O)CC([O-])=O	3-hydroxyhexanoylcarnitine (1)	3-hydroxyhexanoylcarnitine (1)						Pos Early
100020826	400	62556	219907	Lipid	Fatty Acid Metabolism (Acyl Carnitine, Hydroxy)	1940	NAMED	VYEONLJQPYRKAN-UHFFFAOYSA-N	C[N+](C)(C)CC(OC(CC(O)CCC)=O)CC([O-])=O	3-hydroxyhexanoylcarnitine (2)	3-hydroxyhexanoylcarnitine (2)						Pos Early
100020837	305	63042	221622	Xenobiotics	Drug - Topical Agents	5992	NAMED	AKEUNCKRJATALU-UHFFFAOYSA-N	OC(C1=C(O)C=CC=C1O)=O	2,6-dihydroxybenzoic acid	2,6-dihydroxybenzoic acid	303-07-1	8974	HMDB0013676		9338	Polar
100020893	209	62805	220431	Amino Acid	Methionine, Cysteine, SAM and Taurine Metabolism	454	NAMED	XMZBEAXQGSBWLG-NSCUHMNNSA-N	OC(C(O)=O)C(O)/C=C/SC	2,3-dihydroxy-5-methylthio-4-pentenoate (DMTPA)*	2,3-dihydroxy-5-methylthio-4-pentenoate (DMTPA)*			HMDB0240388			Neg
100020975	209	63227	222084	Xenobiotics	Chemical	6286	NAMED	GOXQGRHDLROYBT-UHFFFAOYSA-N	CC1=NC=CC=C1OS(=O)(O)=O	3-hydroxy-2-methylpyridine sulfate	3-hydroxy-2-methylpyridine sulfate						Neg
100021000	402	62851	220620	Lipid	Sphingomyelins	3125	NAMED	FAVAZPKFPKOYCT-VTAPXIELSA-N	CCCCCCCCCCCCCCC(O)C(N[C@@H](COP([O-])(OCC[N+](C)(C)C)=O)[C@@H](/C=C/CCCCCCCCCCCCC)O)=O	hydroxypalmitoyl sphingomyelin (d18:1/16:0(OH))**	hydroxypalmitoyl sphingomyelin (d18:1/16:0(OH))**						Pos Late
100021092	209	62887	220738	Xenobiotics	Food Component/Plant	4949	NAMED	WXAIESXRQLSDGI-UHFFFAOYSA-N	COC1=C(O)C=C2C(C(C(C3=CC=C(OS(O)(=O)=O)C=C3)=CO2)=O)=C1	glycitein sulfate (2)	glycitein sulfate (2)						Neg
100021100	209	62918	220774	Lipid	Fatty Acid, Dicarboxylate	1712	NAMED	MUFSRLVOUKHPIZ-OVYZBVKCSA-N	O=C(O)CCC/C=C\C/C=C\CCCCC(O)=O	tetradecadienedioate (C14:2-DC)*	tetradecadienedioate (C14:2-DC)*					86018718	Neg
100021105	209	62923	220779	Lipid	Fatty Acid, Dicarboxylate	1721	NAMED	NZLFRLCYQVOISV-IWQZZHSRSA-N	OC(CCCCCCCCC/C=C\CCCCCCCC(O)=O)=O	eicosenedioate (C20:1-DC)*	eicosenedioate (C20:1-DC)*						Neg
100021107	400	62917	220772	Peptide	Polypeptide	1153	NAMED	QTVRCQRIGVKQHD-UHFFFAOYSA-N	O=C(O)C(C(C)C)NC(C(NC(CNC(C(N)CCC(O)=O)=O)=O)CC(N)=O)=O	glu-gly-asn-val**	glu-gly-asn-val**		16618843				Pos Early
100021123	400	62959	220848	Amino Acid	Lysine Metabolism	119	NAMED	ZRJHLGYVUCPZNH-MQWKRIRWSA-N	[O-]C([C@@H](N)C(O)CCC[N+](C)(C)C)=O	hydroxy-N6,N6,N6-trimethyllysine*	hydroxy-N6,N6,N6-trimethyllysine*						Pos Early
100021131	402	63613	222938	Lipid	Fatty Acid Metabolism (Acyl Carnitine, Monounsaturated)	1899	NAMED	FVOVZEONZTWNTC-OUKQBFOZSA-N	CCCCCCCC/C=C/C(OC(CC([O-])=O)C[N+](C)(C)C)=O	undecenoylcarnitine (C11:1)	undecenoylcarnitine (C11:1)						Pos Late
100021141	402	63358	222426	Lipid	Fatty Acid Metabolism (Acyl Carnitine, Hydroxy)	1945	NAMED	VCRSQDIROUELAR-UHFFFAOYSA-N	OC(CCCCCCC)CC(OC(CC([O-])=O)C[N+](C)(C)C)=O	3-hydroxydecanoylcarnitine	3-hydroxydecanoylcarnitine		59664325	HMDB0061636		121454166	Pos Late
100021198	209	63057	221668	Lipid	Fatty Acid Metabolism (Acyl Glycine)	1855	NAMED	MNYZGNSHBPLAFN-UHFFFAOYSA-N	O=C(C1=CC=CC=N1)N([H])CC(O)=O	picolinoylglycine	picolinoylglycine	5616-29-5	9963296	HMDB0059766		11788622	Neg
100021220	305	63678	223092	Amino Acid	Methionine, Cysteine, SAM and Taurine Metabolism	482	NAMED	SBQWITJAJITAMM-UHFFFAOYSA-N	OC(CCC(NCCS(=O)(O)=O)=O)=O	succinoyltaurine	succinoyltaurine		20509456				Polar
100021223	209	63224	222081	Lipid	Endocannabinoid	2198	NAMED	ADFXUGRCALOSKU-UHFFFAOYSA-N	CCCCCC(NCCS(=O)(O)=O)=O	hexanoyltaurine	hexanoyltaurine		1680723			2245940	Neg
100021238	400	63039	221211	Peptide	Dipeptide	949	NAMED	WJSNJMXOBDSZDL-UHFFFAOYSA-N	NC(CC1=CC=CC=C1)C(N2C(C(O)=O)CC(O)C2)=O	phenylalanylhydroxyproline*	phenylalanylhydroxyproline*		35032073	HMDB0011176		53480675	Pos Early
100021261	400	63052	221645	Peptide	Dipeptide Derivative	669	NAMED	JCCZCUUYYHWRGX-UHFFFAOYSA-N	NC(CC(C)C)C(N1C(C(O)=O)CC(O)C1)=O	leucylhydroxyproline*	leucylhydroxyproline*		20170035	HMDB0028930		20847829	Pos Early
100021262	400	63051	221644	Peptide	Dipeptide Derivative	668	NAMED	IFZSZULHIWFRSB-UHFFFAOYSA-N	NC(C(C)CC)C(N1C(C(O)=O)CC(O)C1)=O	isoleucylhydroxyproline*	isoleucylhydroxyproline*		35032815	HMDB0028908		61158802	Pos Early
100021324	305	63589	222870	Xenobiotics	Chemical	6291	NAMED	KLXACYSQYFWVLM-UHFFFAOYSA-N	ClC1=C(O)C(C(O)=O)=C(O)C(Cl)=C1	3,5-dichloro-2,6-dihydroxybenzoic acid	3,5-dichloro-2,6-dihydroxybenzoic acid		24339141			24721632	Polar
100021363	209	63853	223434	Xenobiotics	Food Component/Plant	5242	NAMED	LOODYTDRRBLQNH-UHFFFAOYSA-N	OC1=CC=C(C=C1OC)C(NCC(O)=O)=O	vanilloylglycine	vanilloylglycine		2340857	HMDB0060026		3083688	Neg
100021372	305	63739	223275	Amino Acid	Methionine, Cysteine, SAM and Taurine Metabolism	455	NAMED	ONFOSYPQQXJWGS-UHFFFAOYSA-N	CSCCC(O)C(O)=O	2-hydroxy-4-(methylthio)butanoic acid	2-hydroxy-4-(methylthio)butanoic acid	583-91-5		HMDB0037115		11427	Polar
100021374	209	63191	221986	Lipid	Fatty Acid, Dicarboxylate	1711	NAMED	JUODHHFNSQAXKF-UHFFFAOYSA-N	CCCCCC(CCCC(O)=O)CCCC(O)=O	branched chain 14:0 dicarboxylic acid**	branched chain 14:0 dicarboxylic acid**						Neg
100021467	305	63264	222194	Partially Characterized Molecules	Partially Characterized Molecules	6455	NAMED			pentose acid*	pentose acid*			HMDB0000892	C00803	7991	Polar
100021478	209	64596	238814	Amino Acid	Histidine Metabolism	95	NAMED	MXETUSMIYKMMAT-UHFFFAOYSA-N	CN1C=NC=C1CC(O)C(O)=O	1-methyl-5-imidazolelactate	1-methyl-5-imidazolelactate	2022510-60-5	65563369				Neg
100021502	209	63436	222605	Lipid	Medium Chain Fatty Acid	1516	NAMED	WXBXVVIUZANZAU-CMDGGOBGSA-N	CCCCCCC/C=C/C(O)=O	(2 or 3)-decenoate (10:1n7 or n8)	(2 or 3)-decenoate (10:1n7 or n8)						Neg
100021666	209	63615	222957	Partially Characterized Molecules	Partially Characterized Molecules	6462	NAMED	NIFITBVFNGQSNA-SOFGYWHQSA-N	CC(C)CCCC/C=C/C(O)=O	branched-chain, straight-chain, or cyclopropyl 10:1 fatty acid (1)*	branched-chain, straight-chain, or cyclopropyl 10:1 fatty acid (1)*						Neg
100021673	209	64173	236716	Lipid	Fatty Acid, Branched	1648	NAMED	GJWSUKYXUMVMGX-UHFFFAOYSA-N	O=C(CC(C)CC/C=C(C)/C)O	citronellic acid	citronellic acid	502-47-6	9973	HMDB35837	C16462	10402	Neg
100021680	209	63653	223036	Partially Characterized Molecules	Partially Characterized Molecules	6443	NAMED			glycine conjugate of C6H10O2 (2)*	glycine conjugate of C6H10O2 (2)*						Neg
100021681	209	63654	223037	Partially Characterized Molecules	Partially Characterized Molecules	6444	NAMED			glycine conjugate of C6H10O2 (3)*	glycine conjugate of C6H10O2 (3)*						Neg
100021711	305	63685	223111	Lipid	Fatty Acid, Dicarboxylate	1700	NAMED	FRWVXIATCBRYHA-KPMZXABDSA-N	OC(/C=C/C=C/CCCCC(O)=O)=O	decadienedioic acid (C10:2-DC)**	decadienedioic acid (C10:2-DC)**					17789717	Polar
100021728	402	64389	237480	Lipid	Fatty Acid Metabolism (Acyl Carnitine, Medium Chain)	1874	NAMED	LNGSHJPPGDBEPT-VYAYZGMFSA-N	O=C(C[C@@]1([H])[C@@](C1)([H])CCC)OC(CC([O-])=O)C[N+](C)(C)C	cis-3,4-methyleneheptanoylcarnitine	cis-3,4-methyleneheptanoylcarnitine						Pos Late
100021760	305	63920	223829	Amino Acid	Lysine Metabolism	141	NAMED	FTTGAAZKBNZDCZ-LURJTMIESA-N	CC(N[C@@](CCCC(O)=O)(C(O)=O)[H])=O	N-acetyl-2-aminoadipate	N-acetyl-2-aminoadipate		392027		C12986	443992	Polar
100021784	209	63988	232906	Xenobiotics	Chemical	6298	NAMED	XRHGYUZYPHTUJZ-UHFFFAOYSA-N	O=C(O)C1=CC=C(Cl)C=C1	4-chlorobenzoic acid	4-chlorobenzoic acid	74-11-3			C02370	6318	Neg
100021839	209	64049	233195	Xenobiotics	Benzoate Metabolism	4607	NAMED	LEJCLCZOTCOTQE-UHFFFAOYSA-N	OC1=CC=C(OS(=O)(O)=O)C=C1OC	2-methoxyhydroquinone sulfate (1)	2-methoxyhydroquinone sulfate (1)						Neg
100021840	209	64050	233196	Xenobiotics	Benzoate Metabolism	4608	NAMED	DQJWAJBJWZYKLK-UHFFFAOYSA-N	OC1=CC=C(OS(=O)(O)=O)C(OC)=C1	2-methoxyhydroquinone sulfate (2)	2-methoxyhydroquinone sulfate (2)						Neg
100021918	209	64328	237314	Xenobiotics	Chemical	6209	NAMED	ICKWICRCANNIBI-UHFFFAOYSA-N	CC(C)(c1cc(C(C)(C)C)c(O)cc1)C	2,4-di-tert-butylphenol	2,4-di-tert-butylphenol	96-76-4					Neg
100021990	400	64393	237477	Lipid	Fatty Acid Metabolism (Acyl Carnitine, Hydroxy)	1942	NAMED	RCXSFDNDEVSQNG-UHFFFAOYSA-N	[O-]C(CC(OC(C(O)CCCCCC)=O)C[N+](C)(C)C)=O	3-hydroxyoctanoylcarnitine (1)	3-hydroxyoctanoylcarnitine (1)						Pos Early
100021991	400	64394	237478	Lipid	Fatty Acid Metabolism (Acyl Carnitine, Hydroxy)	1943	NAMED	RCXSFDNDEVSQNG-UHFFFAOYSA-N	[O-]C(CC(OC(C(O)CCCCCC)=O)C[N+](C)(C)C)=O	3-hydroxyoctanoylcarnitine (2)	3-hydroxyoctanoylcarnitine (2)						Pos Early
100021992	209	64386	237461	Lipid	Fatty Acid Metabolism (Acyl Glycine)	1832	NAMED	FFFQOVJTIDIKQJ-YUMQZZPRSA-N	O=C(NCC(O)=O)C[C@@H]1C[C@@H]1CCC	cis-3,4-methyleneheptanoylglycine	cis-3,4-methyleneheptanoylglycine						Neg
100022004	209	64404	237533	Partially Characterized Molecules	Partially Characterized Molecules	6476	NAMED			bilirubin degradation product, C16H18N2O5 (2)**	bilirubin degradation product, C16H18N2O5 (2)**						Neg
100022005	209	64409	237542	Partially Characterized Molecules	Partially Characterized Molecules	6477	NAMED			bilirubin degradation product, C17H18N2O4 (1)**	bilirubin degradation product, C17H18N2O4 (1)**						Neg
100022006	209	64407	237539	Partially Characterized Molecules	Partially Characterized Molecules	6478	NAMED			bilirubin degradation product, C17H18N2O4 (2)**	bilirubin degradation product, C17H18N2O4 (2)**						Neg
100022007	209	64408	237541	Partially Characterized Molecules	Partially Characterized Molecules	6479	NAMED			bilirubin degradation product, C17H18N2O4 (3)**	bilirubin degradation product, C17H18N2O4 (3)**						Neg
100022008	209	64405	237535	Partially Characterized Molecules	Partially Characterized Molecules	6480	NAMED			bilirubin degradation product, C17H20N2O5 (1)**	bilirubin degradation product, C17H20N2O5 (1)**						Neg
100022009	209	64406	237537	Partially Characterized Molecules	Partially Characterized Molecules	6481	NAMED			bilirubin degradation product, C17H20N2O5 (2)**	bilirubin degradation product, C17H20N2O5 (2)**						Neg
100022015	209	64415	237569	Partially Characterized Molecules	Partially Characterized Molecules	6483	NAMED			bilirubin degradation product, C16H18N2O5 (4)**	bilirubin degradation product, C16H18N2O5 (4)**						Neg
100022017	305	64419	237630	Xenobiotics	Chemical	6097	NAMED	DZBLVPJKDJIALK-UHFFFAOYSA-N	OCC(C)(C)COC(CCCCCCCC(O)=O)=O	neopentyl glycol azelate**	neopentyl glycol azelate**						Polar
100022041	400	64571	238237	Peptide	Modified Peptides	1236	NAMED	VOWFCBSRZKGKTF-UHFFFAOYSA-N	O=C(N1CCCC1C([O-])=O)C2CCC[N+]2(C)C	N,N-dimethyl-pro-pro	N,N-dimethyl-pro-pro						Pos Early
100022120	400	64568	238235	Amino Acid	Tryptophan Metabolism	268	NAMED	YLEQTOAIAOPFBY-UHFFFAOYSA-N	OC(C(N)(C)N(C1=C(C2)C=CC=C1)C2=O)=O	oxindolylalanine	oxindolylalanine					20977764	Pos Early
100022172	305	64623	239195	Xenobiotics	Chemical	6380	NAMED	QZHDEAJFRJCDMF-UHFFFAOYSA-N	FC(F)(F)C(F)(F)C(F)(F)C(F)(F)C(F)(F)C(F)(F)S(=O)(O)=O	perfluorohexanesulfonate (PFHxS)	perfluorohexanesulfonate (PFHxS)	355-46-4		HMDB0094700			Polar
100022517	402	64896	240146	Lipid	Lysoplasmalogen	2847	NAMED		[H][C@](O)(COP(OCC[N+](C)(C)C)([O-])=O)COCCCCCCCC/C=C\CCCCCCCC	1-oleyl-GPC (O-18:1)*	1-oleyl-GPC (O-18:1)*						Pos Late
999910445	400	47680	157553				UNNAMED			X-10445	X-10445						Pos Early
999910457	400	47581	157489				UNNAMED			X-10457	X-10457						Pos Early
999911381	209	46347	145026				UNNAMED			X-11381	X-11381						Neg
999911612	209	47431	148921				UNNAMED			X-11612	X-11612						Neg
999911787	400	33132	156002				UNNAMED			X-11787	X-11787						Pos Early
999911795	400	33140	156004				UNNAMED			X-11795	X-11795						Pos Early
999911852	209	46521	145608				UNNAMED			X-11852	X-11852						Neg
999911861	209	47655	149588				UNNAMED			X-11861	X-11861						Neg
999911979	209	47508	149008				UNNAMED			X-11979	X-11979						Neg
999912097	400	47685	157558				UNNAMED			X-12097	X-12097						Pos Early
999912100	400	47687	157560				UNNAMED			X-12100	X-12100						Pos Early
999912101	400	47642	157543				UNNAMED			X-12101	X-12101						Pos Early
999912104	209	52597	165325				UNNAMED			X-12104	X-12104						Neg
999912117	400	47695	157567				UNNAMED			X-12117	X-12117						Pos Early
999912124	400	47700	157572				UNNAMED			X-12124	X-12124						Pos Early
999912127	400	47702	157574				UNNAMED			X-12127	X-12127						Pos Early
999912193	400	47705	157576				UNNAMED			X-12193	X-12193						Pos Early
999912216	209	46613	146375				UNNAMED			X-12216	X-12216						Neg
999912221	209	47911	150059				UNNAMED			X-12221	X-12221						Neg
999912267	209	47916	150066				UNNAMED			X-12267	X-12267						Neg
999912306	209	47917	150069				UNNAMED			X-12306	X-12306						Neg
999912411	209	46616	146378				UNNAMED			X-12411	X-12411						Neg
999912462	400	46620	157261				UNNAMED			X-12462	X-12462						Pos Early
999912544	209	46510	145597				UNNAMED			X-12544	X-12544						Neg
999912680	400	47437	157418				UNNAMED			X-12680	X-12680						Pos Early
999912707	209	47929	150086				UNNAMED			X-12707	X-12707						Neg
999912726	209	47936	150096				UNNAMED			X-12726	X-12726						Neg
999912730	209	47937	150100				UNNAMED			X-12730	X-12730						Neg
999912798	400	46624	157263				UNNAMED			X-12798	X-12798						Pos Early
999913007	209	47203	148680				UNNAMED			X-13007	X-13007						Neg
999913553	209	47959	150152				UNNAMED			X-13553	X-13553						Neg
999913695	209	47962	150157				UNNAMED			X-13695	X-13695						Neg
999913846	209	47978	150178				UNNAMED			X-13846	X-13846						Neg
999914056	400	46632	157266				UNNAMED			X-14056	X-14056						Pos Early
999914904	209	47204	148681				UNNAMED			X-14904	X-14904						Neg
999915245	209	46661	146603				UNNAMED			X-15245	X-15245						Neg
999915461	400	46283	157144				UNNAMED			X-15461	X-15461						Pos Early
999915503	209	46977	148230				UNNAMED			X-15503	X-15503						Neg
999915674	209	46665	146609				UNNAMED			X-15674	X-15674						Neg
999916271	209	46357	145056				UNNAMED			X-16271	X-16271						Neg
999916397	400	47802	157623				UNNAMED			X-16397	X-16397						Pos Early
999916576	209	46673	146620				UNNAMED			X-16576	X-16576						Neg
999916580	400	47804	157625				UNNAMED			X-16580	X-16580						Pos Early
999916649	209	47992	150196				UNNAMED			X-16649	X-16649						Neg
999917010	209	47993	150197				UNNAMED			X-17010	X-17010						Neg
999917146	209	46691	146642				UNNAMED			X-17146	X-17146						Neg
999917162	402	47806	160173				UNNAMED			X-17162	X-17162						Pos Late
999917304	400	47796	157617				UNNAMED			X-17304	X-17304						Pos Early
999917325	400	47815	157636				UNNAMED			X-17325	X-17325						Pos Early
999917335	402	47820	160187				UNNAMED			X-17335	X-17335						Pos Late
999917367	209	46994	148247				UNNAMED			X-17367	X-17367						Neg
999917676	209	46970	148223				UNNAMED			X-17676	X-17676						Neg
999918059	209	48039	150245				UNNAMED			X-18059	X-18059						Neg
999918750	209	48045	150251				UNNAMED			X-18750	X-18750						Neg
999918913	209	46695	146647				UNNAMED			X-18913	X-18913						Neg
999919141	209	46701	146658				UNNAMED			X-19141	X-19141						Neg
999919438	209	46261	144424				UNNAMED			X-19438	X-19438						Neg
999920512	209	54689	180903				UNNAMED			X-20512	X-20512						Neg
999921286	209	46295	144528				UNNAMED			X-21286	X-21286						Neg
999921310	209	46354	145053				UNNAMED			X-21310	X-21310						Neg
999921351	209	46396	145479				UNNAMED			X-21351	X-21351						Neg
999921353	209	46398	145481				UNNAMED			X-21353	X-21353						Neg
999921796	209	46972	148225				UNNAMED			X-21796	X-21796						Neg
999922162	400	47417	157401				UNNAMED			X-22162	X-22162						Pos Early
999922776	209	48081	150295				UNNAMED			X-22776	X-22776						Neg
999923201	209	48897	160492				UNNAMED			X-23201	X-23201						Neg
999923587	400	49463	161125				UNNAMED			X-23587	X-23587						Pos Early
999923593	400	49469	161131				UNNAMED			X-23593	X-23593						Pos Early
999923636	400	49512	161176				UNNAMED			X-23636	X-23636						Pos Early
999923639	400	49515	161179				UNNAMED			X-23639	X-23639						Pos Early
999923654	400	49531	161212				UNNAMED			X-23654	X-23654						Pos Early
999923665	400	49542	161233				UNNAMED			X-23665	X-23665						Pos Early
999923678	402	49555	161246				UNNAMED			X-23678	X-23678						Pos Late
999923737	400	49635	161453				UNNAMED			X-23737	X-23737						Pos Early
999923739	400	49637	161456				UNNAMED			X-23739	X-23739						Pos Early
999923767	402	49665	161486				UNNAMED			X-23767	X-23767						Pos Late
999923780	400	49679	161531				UNNAMED			X-23780	X-23780						Pos Early
999923782	402	49681	161533				UNNAMED			X-23782	X-23782						Pos Late
999924243	400	52286	164314				UNNAMED			X-24243	X-24243						Pos Early
999924257	209	52311	164340				UNNAMED			X-24257	X-24257						Neg
999924295	209	52483	165167				UNNAMED			X-24295	X-24295						Neg
999924328	209	52524	165251				UNNAMED			X-24328	X-24328						Neg
999924408	400	52637	165390				UNNAMED			X-24408	X-24408						Pos Early
999924425	400	52655	165410				UNNAMED			X-24425	X-24425						Pos Early
999924431	400	52661	165416				UNNAMED			X-24431	X-24431						Pos Early
999924432	400	52662	165417				UNNAMED			X-24432	X-24432						Pos Early
999924456	400	52773	165608				UNNAMED			X-24456	X-24456						Pos Early
999924518	400	52839	165684				UNNAMED			X-24518	X-24518						Pos Early
999924549	209	52870	165716				UNNAMED			X-24549	X-24549						Neg
999924608	209	53023	165964				UNNAMED			X-24608	X-24608						Neg
999924623	209	53050	166437				UNNAMED			X-24623	X-24623						Neg
999924625	209	53052	166439				UNNAMED			X-24625	X-24625						Neg
999924642	209	53070	166457				UNNAMED			X-24642	X-24642						Neg
999924665	209	53093	166480				UNNAMED			X-24665	X-24665						Neg
999924670	209	53098	166485				UNNAMED			X-24670	X-24670						Neg
999924674	209	53102	166489				UNNAMED			X-24674	X-24674						Neg
999924675	209	53103	166490				UNNAMED			X-24675	X-24675						Neg
999924707	209	53135	166522				UNNAMED			X-24707	X-24707						Neg
999924952	209	57719	213221				UNNAMED			X-24952	X-24952						Neg
999924978	209	57819	213980				UNNAMED			X-24978	X-24978						Neg
999925172	400	62151	219057				UNNAMED			X-25172	X-25172						Pos Early
999925247	209	62464	219705				UNNAMED			X-25247	X-25247						Neg
999925271	400	62500	219782				UNNAMED			X-25271	X-25271						Pos Early
999925343	400	62636	220135				UNNAMED			X-25343	X-25343						Pos Early
999925419	400	62716	220234				UNNAMED			X-25419	X-25419						Pos Early
999925420	400	62717	220235				UNNAMED			X-25420	X-25420						Pos Early
999925422	400	62719	220237				UNNAMED			X-25422	X-25422						Pos Early
999925454	209	62824	220485				UNNAMED			X-25454	X-25454						Neg
999925514	209	62956	220843				UNNAMED			X-25514	X-25514						Neg
999925516	209	62960	220849				UNNAMED			X-25516	X-25516						Neg
999925519	400	62963	220852				UNNAMED			X-25519	X-25519						Pos Early
999925520	400	62964	220853				UNNAMED			X-25520	X-25520						Pos Early
999925877	400	63777	223335				UNNAMED			X-25877	X-25877						Pos Early
999925948	400	63899	223706				UNNAMED			X-25948	X-25948						Pos Early
999926035	400	64248	235746				UNNAMED			X-26035	X-26035						Pos Early
999926091	400	64366	237396				UNNAMED			X-26091	X-26091						Pos Early
999926107	402	64396	237487				UNNAMED			X-26107	X-26107						Pos Late
999926108	402	64397	237488				UNNAMED			X-26108	X-26108						Pos Late

## Sheet: Fig.2IJ_Sample Data
PARENT_SAMPLE_NAME	CLIENT_IDENTIFIER	NEG	POLAR	POS EARLY	POS LATE	AGE	ANIMAL_ID	BOX_NUMBER	CLIENT_MATRIX	CLIENT_SAMPLE_ID	CLIENT_SAMPLE_NUMBER	DRUG	DRUG2	EXERCISE	EXERCISE2	GASTROCNEMIUS	GENDER	GROUP_ID	GROUP_NAME	GROUP_NUMBER	MASS_EXTRACTED	SAMPLE_AMOUNT	SAMPLE_AMOUNT_UNITS	SAMPLE_BOX_LOCATION	SAMPLE_DESCRIPTION	TREATMENT	VOL_EXTRACTED
UCAM-55692	5	277293	277297	277289	277285	97d	M40	1	TISSUE	M40_HR_RG	5	2HB	2HB	Running	Run	Red	male	HR_R	HR	5	24	0.05473	g	A5	SKELETAL MUSCLE: red gastrocnemius	2-Hydroxybutyrate, treadmill Running	600
UCAM-55693	6	277293	277297	277289	277285	97d	M41	1	TISSUE	M41_HS_RG	6	2HB	2HB	Sedentary	Sed	Red	male	HS_R	HS	6	24	0.05989	g	A6	SKELETAL MUSCLE: red gastrocnemius	2-Hydroxybutyrate, Sedentary control	600
UCAM-55698	17	277293	277297	277289	277285	77d	M70	1	TISSUE	M70_HR_RG	17	2HB	2HB	Running	Run	Red	male	HR_R	HR	5	24	0.09284	g	B8	SKELETAL MUSCLE: red gastrocnemius	2-Hydroxybutyrate, treadmill Running	600
UCAM-55699	18	277293	277297	277289	277285	77d	M71	1	TISSUE	M71_HS_RG	18	2HB	2HB	Sedentary	Sed	Red	male	HS_R	HS	6	24	0.06861	g	B9	SKELETAL MUSCLE: red gastrocnemius	2-Hydroxybutyrate, Sedentary control	600
UCAM-55704	29	277293	277297	277289	277285	77d	M92	1	TISSUE	M92_HR_RG	29	2HB	2HB	Running	Run	Red	male	HR_R	HR	5	24	0.06363	g	D2	SKELETAL MUSCLE: red gastrocnemius	2-Hydroxybutyrate, treadmill Running	600
UCAM-55705	30	277293	277297	277289	277285	77d	M93	1	TISSUE	M93_HS_RG	30	2HB	2HB	Sedentary	Sed	Red	male	HS_R	HS	6	24	0.08322	g	D3	SKELETAL MUSCLE: red gastrocnemius	2-Hydroxybutyrate, Sedentary control	600
UCAM-55710	41	277293	277297	277289	277285	97d	M40	1	TISSUE	M40_HR_WG	41	2HB	2HB	Running	Run	White	male	HR_W	HR	5	24	0.09705	g	E5	SKELETAL MUSCLE: white gastrocnemius	2-Hydroxybutyrate, treadmill Running	600
UCAM-55711	42	277293	277297	277289	277285	97d	M41	1	TISSUE	M41_HS_WG	42	2HB	2HB	Sedentary	Sed	White	male	HS_W	HS	6	24	0.11689	g	E6	SKELETAL MUSCLE: white gastrocnemius	2-Hydroxybutyrate, Sedentary control	600
UCAM-55716	53	277293	277297	277289	277285	77d	M70	1	TISSUE	M70_HR_WG	53	2HB	2HB	Running	Run	White	male	HR_W	HR	5	24	0.13699	g	F8	SKELETAL MUSCLE: white gastrocnemius	2-Hydroxybutyrate, treadmill Running	600
UCAM-55717	54	277293	277297	277289	277285	77d	M71	1	TISSUE	M71_HS_WG	54	2HB	2HB	Sedentary	Sed	White	male	HS_W	HS	6	24	0.09619	g	F9	SKELETAL MUSCLE: white gastrocnemius	2-Hydroxybutyrate, Sedentary control	600
UCAM-55722	65	277293	277297	277289	277285	77d	M92	1	TISSUE	M92_HR_WG	65	2HB	2HB	Running	Run	White	male	HR_W	HR	5	24	0.1418	g	H2	SKELETAL MUSCLE: white gastrocnemius	2-Hydroxybutyrate, treadmill Running	600
UCAM-55723	66	277293	277297	277289	277285	77d	M93	1	TISSUE	M93_HS_WG	66	2HB	2HB	Sedentary	Sed	White	male	HS_W	HS	6	24	0.11148	g	H3	SKELETAL MUSCLE: white gastrocnemius	2-Hydroxybutyrate, Sedentary control	600
UCAM-55728	11	277293	277297	277289	277285	97d	M52	1	TISSUE	M52_HR_RG	11	2HB	2HB	Running	Run	Red	male	HR_R	HR	5	24	0.07643	g	B2	SKELETAL MUSCLE: red gastrocnemius	2-Hydroxybutyrate, treadmill Running	600
UCAM-55729	12	277293	277297	277289	277285	97d	M53	1	TISSUE	M53_HS_RG	12	2HB	2HB	Sedentary	Sed	Red	male	HS_R	HS	6	24	0.06501	g	B3	SKELETAL MUSCLE: red gastrocnemius	2-Hydroxybutyrate, Sedentary control	600
UCAM-55734	23	277293	277297	277289	277285	77d	M81	1	TISSUE	M81_HR_RG	23	2HB	2HB	Running	Run	Red	male	HR_R	HR	5	24	0.05581	g	C5	SKELETAL MUSCLE: red gastrocnemius	2-Hydroxybutyrate, treadmill Running	600
UCAM-55735	24	277293	277297	277289	277285	77d	M82	1	TISSUE	M82_HS_RG	24	2HB	2HB	Sedentary	Sed	Red	male	HS_R	HS	6	24	0.05942	g	C6	SKELETAL MUSCLE: red gastrocnemius	2-Hydroxybutyrate, Sedentary control	600
UCAM-55739	34	277293	277297	277289	277285	77d	M102	1	TISSUE	M102_HR_RG	34	2HB	2HB	Running	Run	Red	male	HR_R	HR	5	24	0.06277	g	D7	SKELETAL MUSCLE: red gastrocnemius	2-Hydroxybutyrate, treadmill Running	600
UCAM-55740	35	277293	277297	277289	277285	77d	M103	1	TISSUE	M103_HS_RG	35	2HB	2HB	Sedentary	Sed	Red	male	HS_R	HS	6	24	0.05246	g	D8	SKELETAL MUSCLE: red gastrocnemius	2-Hydroxybutyrate, Sedentary control	600
UCAM-55746	47	277293	277297	277289	277285	97d	M52	1	TISSUE	M52_HR_WG	47	2HB	2HB	Running	Run	White	male	HR_W	HR	5	24	0.09834	g	F2	SKELETAL MUSCLE: white gastrocnemius	2-Hydroxybutyrate, treadmill Running	600
UCAM-55747	48	277293	277297	277289	277285	97d	M53	1	TISSUE	M53_HS_WG	48	2HB	2HB	Sedentary	Sed	White	male	HS_W	HS	6	24	0.09799	g	F3	SKELETAL MUSCLE: white gastrocnemius	2-Hydroxybutyrate, Sedentary control	600
UCAM-55752	59	277293	277297	277289	277285	77d	M81	1	TISSUE	M81_HR_WG	59	2HB	2HB	Running	Run	White	male	HR_W	HR	5	24	0.16757	g	G5	SKELETAL MUSCLE: white gastrocnemius	2-Hydroxybutyrate, treadmill Running	600
UCAM-55753	60	277293	277297	277289	277285	77d	M82	1	TISSUE	M82_HS_WG	60	2HB	2HB	Sedentary	Sed	White	male	HS_W	HS	6	24	0.13106	g	G6	SKELETAL MUSCLE: white gastrocnemius	2-Hydroxybutyrate, Sedentary control	600
UCAM-55757	70	277293	277297	277289	277285	77d	M102	1	TISSUE	M102_HR_WG	70	2HB	2HB	Running	Run	White	male	HR_W	HR	5	24	0.13716	g	H7	SKELETAL MUSCLE: white gastrocnemius	2-Hydroxybutyrate, treadmill Running	600
UCAM-55758	71	277293	277297	277289	277285	77d	M103	1	TISSUE	M103_HS_WG	71	2HB	2HB	Sedentary	Sed	White	male	HS_W	HS	6	24	0.11457	g	H8	SKELETAL MUSCLE: white gastrocnemius	2-Hydroxybutyrate, Sedentary control	600
UCAM-55688	1	277293	277297	277289	277285	97d	M11	1	TISSUE	M11_VR_RG	1	Vehicle	Veh	Running	Run	Red	male	VR_R	VR	1	24	0.04688	g	A1	SKELETAL MUSCLE: red gastrocnemius	Vehicle, treadmill Running	600
UCAM-55689	2	277293	277297	277289	277285	97d	M23	1	TISSUE	M23_VS_RG	2	Vehicle	Veh	Sedentary	Sed	Red	male	VS_R	VS	2	24	0.0486	g	A2	SKELETAL MUSCLE: red gastrocnemius	Vehicle, Sedentary control	600
UCAM-55694	13	277293	277297	277289	277285	97d	M60	1	TISSUE	M60_VR_RG	13	Vehicle	Veh	Running	Run	Red	male	VR_R	VR	1	24	0.05934	g	B4	SKELETAL MUSCLE: red gastrocnemius	Vehicle, treadmill Running	600
UCAM-55695	14	277293	277297	277289	277285	97d	M61	1	TISSUE	M61_VS_RG	14	Vehicle	Veh	Sedentary	Sed	Red	male	VS_R	VS	2	24	0.06372	g	B5	SKELETAL MUSCLE: red gastrocnemius	Vehicle, Sedentary control	600
UCAM-55700	25	277293	277297	277289	277285	77d	M83	1	TISSUE	M83_VR_RG	25	Vehicle	Veh	Running	Run	Red	male	VR_R	VR	1	24	0.06363	g	C7	SKELETAL MUSCLE: red gastrocnemius	Vehicle, treadmill Running	600
UCAM-55701	26	277293	277297	277289	277285	77d	M84	1	TISSUE	M84_VS_RG	26	Vehicle	Veh	Sedentary	Sed	Red	male	VS_R	VS	2	24	0.08528	g	C8	SKELETAL MUSCLE: red gastrocnemius	Vehicle, Sedentary control	600
UCAM-55706	37	277293	277297	277289	277285	97d	M11	1	TISSUE	M11_VR_WG	37	Vehicle	Veh	Running	Run	White	male	VR_W	VR	1	24	0.08648	g	E1	SKELETAL MUSCLE: white gastrocnemius	Vehicle, treadmill Running	600
UCAM-55707	38	277293	277297	277289	277285	97d	M23	1	TISSUE	M23_VS_WG	38	Vehicle	Veh	Sedentary	Sed	White	male	VS_W	VS	2	24	0.12076	g	E2	SKELETAL MUSCLE: white gastrocnemius	Vehicle, Sedentary control	600
UCAM-55712	49	277293	277297	277289	277285	97d	M60	1	TISSUE	M60_VR_WG	49	Vehicle	Veh	Running	Run	White	male	VR_W	VR	1	24	0.07772	g	F4	SKELETAL MUSCLE: white gastrocnemius	Vehicle, treadmill Running	600
UCAM-55713	50	277293	277297	277289	277285	97d	M61	1	TISSUE	M61_VS_WG	50	Vehicle	Veh	Sedentary	Sed	White	male	VS_W	VS	2	24	0.11947	g	F5	SKELETAL MUSCLE: white gastrocnemius	Vehicle, Sedentary control	600
UCAM-55718	61	277293	277297	277289	277285	77d	M83	1	TISSUE	M83_VR_WG	61	Vehicle	Veh	Running	Run	White	male	VR_W	VR	1	24	0.09516	g	G7	SKELETAL MUSCLE: white gastrocnemius	Vehicle, treadmill Running	600
UCAM-55719	62	277293	277297	277289	277285	77d	M84	1	TISSUE	M84_VS_WG	62	Vehicle	Veh	Sedentary	Sed	White	male	VS_W	VS	2	24	0.10315	g	G8	SKELETAL MUSCLE: white gastrocnemius	Vehicle, Sedentary control	600
UCAM-55724	7	277293	277297	277289	277285	97d	M42	1	TISSUE	M42_VR_RG	7	Vehicle	Veh	Running	Run	Red	male	VR_R	VR	1	24	0.047	g	A7	SKELETAL MUSCLE: red gastrocnemius	Vehicle, treadmill Running	600
UCAM-55725	8	277293	277297	277289	277285	97d	M43	1	TISSUE	M43_VS_RG	8	Vehicle	Veh	Sedentary	Sed	Red	male	VS_R	VS	2	24	0.04692	g	A8	SKELETAL MUSCLE: red gastrocnemius	Vehicle, Sedentary control	600
UCAM-55730	19	277293	277297	277289	277285	77d	M72	1	TISSUE	M72_VR_RG	19	Vehicle	Veh	Running	Run	Red	male	VR_R	VR	1	24	0.07944	g	C1	SKELETAL MUSCLE: red gastrocnemius	Vehicle, treadmill Running	600
UCAM-55731	20	277293	277297	277289	277285	77d	M73	1	TISSUE	M73_VS_RG	20	Vehicle	Veh	Sedentary	Sed	Red	male	VS_R	VS	2	24	0.06544	g	C2	SKELETAL MUSCLE: red gastrocnemius	Vehicle, Sedentary control	600
UCAM-55736	31	277293	277297	277289	277285	77d	M94	1	TISSUE	M94_VR_RG	31	Vehicle	Veh	Running	Run	Red	male	VR_R	VR	1	24	0.06277	g	D4	SKELETAL MUSCLE: red gastrocnemius	Vehicle, treadmill Running	600
UCAM-55737	32	277293	277297	277289	277285	77d	M100	1	TISSUE	M100_VS_RG	32	Vehicle	Veh	Sedentary	Sed	Red	male	VS_R	VS	2	24	0.03881	g	D5	SKELETAL MUSCLE: red gastrocnemius	Vehicle, Sedentary control	600
UCAM-55742	43	277293	277297	277289	277285	97d	M42	1	TISSUE	M42_VR_WG	43	Vehicle	Veh	Running	Run	White	male	VR_W	VR	1	24	0.04052	g	E7	SKELETAL MUSCLE: white gastrocnemius	Vehicle, treadmill Running	600
UCAM-55743	44	277293	277297	277289	277285	97d	M43	1	TISSUE	M43_VS_WG	44	Vehicle	Veh	Sedentary	Sed	White	male	VS_W	VS	2	24	0.12977	g	E8	SKELETAL MUSCLE: white gastrocnemius	Vehicle, Sedentary control	600
UCAM-55748	55	277293	277297	277289	277285	77d	M72	1	TISSUE	M72_VR_WG	55	Vehicle	Veh	Running	Run	White	male	VR_W	VR	1	24	0.143	g	G1	SKELETAL MUSCLE: white gastrocnemius	Vehicle, treadmill Running	600
UCAM-55749	56	277293	277297	277289	277285	77d	M73	1	TISSUE	M73_VS_WG	56	Vehicle	Veh	Sedentary	Sed	White	male	VS_W	VS	2	24	0.09112	g	G2	SKELETAL MUSCLE: white gastrocnemius	Vehicle, Sedentary control	600
UCAM-55754	67	277293	277297	277289	277285	77d	M94	1	TISSUE	M94_VR_WG	67	Vehicle	Veh	Running	Run	White	male	VR_W	VR	1	24	0.0955	g	H4	SKELETAL MUSCLE: white gastrocnemius	Vehicle, treadmill Running	600
UCAM-55755	68	277293	277297	277289	277285	77d	M100	1	TISSUE	M100_VS_WG	68	Vehicle	Veh	Sedentary	Sed	White	male	VS_W	VS	2	24	0.02549	g	H5	SKELETAL MUSCLE: white gastrocnemius	Vehicle, Sedentary control	600

[truncated: 2 more sheets: Fig.2IJ_Metabolite Data, Fig.2L]
