# Supplementary material for: A 2-hydroxybutyrate-mediated feedback loop regulates muscular fatigue
Source: eLife. 2024 Sep 3;12:RP92707. doi: 10.7554/eLife.92707 (PMC11371357; doi:10.7554/eLife.92707)
Supplement: Figure 3—figure supplement 1—source data 1. [file elife-92707-fig3-figsupp1-data1.xlsx]

## Sheet: SUPP_FIG_3A
		WITH PYRUVATE																					WITHOUT PYRUVATE
	Time (min)	NaCl						Na2HB						Na2KB								Time (min)	NaCl			Na2HB				Na2KB
	1.41	1.01959	1.15117	1.17456	1.11527	1.19544	1.0718	1.14351	1.09964	1.14104	1.24906	1.16044		1.12394	1.04163	1.0879	1.07463	1.09037	1.11319			1.41	1.08502	1.1288	1.10277	1.07155	1.14583	1.09042	1.07722	1.08074	1.14314	1.0666
	7.95	0.96564	0.996861	0.995463	0.988574	0.992842	0.982802	0.989457	0.995352	1.03242	0.977176	0.9826		1.00078	1.012	0.997028	0.979961	0.990721	0.983484			7.95	1.00637	1.03142	1.01818	1.01858	1.04526	1.02026	1.02373	1.01513	1.07856	1.02269
	14.5	0.976858	0.97432	0.965377	0.947748	0.988245	0.971507	0.985672	0.984649	0.992816	0.983769	0.95459		0.974102	0.998572	0.979046	0.979621	0.97289	0.96026			14.5	1	1	1	1	1	1	1	1	1	1
	23.17	1.01957	0.933022	0.932078	0.976571	0.913457	0.986683	0.940794	0.966171	0.933391	0.887548	0.938317		0.978735	0.996562	0.979578	0.997239	0.990502	0.984793			23.17	0.970517	0.97104	0.966516	0.97732	0.985606	0.964771	0.983065	1.01173	1.00991	1.00074
	31.75	1.0258	0.96016	0.96394	0.990491	0.955329	0.997615	0.965293	0.974843	0.949563	0.918674	0.969542		0.970023	0.972594	0.978702	0.981128	0.981349	0.976708			31.75	0.972815	0.968017	0.970057	0.979279	0.991333	0.972758	0.990336	1.00023	1.00286	0.978523
	40.34	0.992548	0.984464	0.968586	0.981347	0.954683	0.989599	0.975275	0.979345	0.950766	0.983776	0.994508		0.952418	0.978644	0.977743	0.987418	0.974171	0.981567			40.34	0.990825	0.989418	0.999454	1.00407	1.01944	0.982027	1.00577	1.00464	1.01175	0.970552
	48.93	1.04017	1.00294	1.02122	0.98817	1.01985	0.998407	0.986249	0.996189	0.959878	1.01608	1.02346		0.965152	0.995204	0.994703	0.999763	0.992451	1.0167			48.93	0.996898	0.989192	1.0036	0.979575	1.01693	0.980933	1.01408	0.997506	1.00924	0.96855
	57.52	1.0092	1.03701	1.01012	0.999096	0.998885	1.00265	1.00099	1.00213	0.98184	1.0332	1.01971		0.955491	1.00353	1.00363	1.00086	1.00187	1.03446			57.52	1.00951	1.02013	1.01225	1.00949	1.04704	0.997327	1.02153	1.0058	1.02794	0.979126
	66.12	1.01027	1.02179	0.998043	0.993389	1.03762	1.0013	1.00081	1.00677	0.977348	1.05244	1.0442		0.957585	1.00594	1.00909	1.01834	1.00191	1.03347			66.12	1.02417	1.01423	1.01826	0.999398	1.03625	1.02416	1.03973	0.992761	1.03045	0.973308
	74.72	1.04484	1.06503	1.03374	1.0167	1.04219	1.01978	1.04068	1.03638	0.994623	1.18616	1.08717		0.967583	1.02557	1.02688	1.02793	1.02199	1.05965			74.72	1.0352	1.03754	1.03141	1.02876	1.06697	1.04038	1.05685	1.01544	1.04218	0.991015
	83.32	1.0472	1.05732	1.04383	1.03234	1.07762	1.02217	1.05203	1.04002	0.99826	1.17086	1.08646		0.959227	1.03564	1.03942	1.03898	1.02674	1.05449			83.32	1.02893	1.04484	1.02806	1.02769	1.07768	1.04222	1.05528	0.997365	1.03562	0.996604
	91.91	1.06423	1.05211	1.0466	1.02244	1.06311	1.02614	1.05409	1.04465	1.02658	1.19266	1.1068		0.984118	1.03257	1.04482	1.02814	1.03459	1.07789			91.91	1.03725	1.04193	1.04018	1.04379	1.0904	1.03779	1.0581	1.01326	1.05985	1.00329
	100.55	0.737669	0.560783	0.66796	0.59575	0.204519	0.569365	0.410013	0.548314	0.622525	0.53349	0.0761543		0.48849	0.503112	0.528937	0.547031	0.565288	0.190802			100.55	0.553054	0.49216	0.552874	0.537964	0.603172	0.512061	0.530265	0.503701	0.507396	0.491875
	109.14	0.772544	0.630911	0.724093	0.668993	0.290938	0.643741	0.484602	0.626648	0.681334	0.26593	0.252412		0.554404	0.583745	0.615819	0.622589	0.639618	0.330485			109.14	0.561784	0.519638	0.54094	0.572412	0.620882	0.555167	0.574092	0.560039	0.566059	0.547597
	117.72	0.761737	0.634307	0.712075	0.666869	0.300881	0.648759	0.483528	0.616355	0.675759	0.305518	0.247188		0.593409	0.572651	0.603863	0.628585	0.634822	0.293735			117.72	0.552608	0.505387	0.552987	0.572189	0.613703	0.545134	0.557993	0.546247	0.552511	0.557653
	126.38	1.23211	1.39765	1.1849	1.3726	1.97985	1.42722	1.61497	1.58317	1.17038	2.31222	2.01904		1.76788	1.37811	1.43183	1.69448	1.52669	2.07276			126.38	1.20338	1.17925	1.04468	0.986615	1.20364	1.17209	1.11374	1.31311	1.22785	1.2043
	134.95	1.20791	1.39815	1.20078	1.42668	2.0721	1.39589	1.6325	1.51261	1.20802	2.47545	2.00097		1.73484	1.46861	1.4279	1.67125	1.51129	1.9945			134.95	1.07358	1.0902	1.01158	1.04175	1.10709	1.06378	1.01637	1.25279	1.12185	1.17788
	143.55	1.2575	1.40248	1.22048	1.43272	2.03338	1.37354	1.65923	1.50789	1.2567	2.68549	2.06273		1.72306	1.54094	1.50806	1.6913	1.49815	2.06371			143.55	1.04395	1.09768	0.99915	1.0553	1.12615	1.05368	1.04214	1.23755	1.17419	1.17815
	152.21	0.57782	0.384598	0.524511	0.417176	0.150583	0.333348	0.057059	0.308189	0.500548	0.416838	0.450569		0.311691	0.308814	0.285043	0.356463	0.330865	0.29195			152.21	0.257313	0.228499	0.306	0.245343	0.349567	0.260883	0.262318	0.280129	0.283853	0.286133
	160.8	0.507694	0.340542	0.50493	0.377346	0.229338	0.314659	0.056138	0.292493	0.465693	0.423807	0.465064		0.306489	0.314419	0.275773	0.354444	0.309854	0.29404			160.8	0.252751	0.2081	0.27094	0.208535	0.322602	0.250543	0.254991	0.263021	0.266598	0.265065
	169.38	0.506526	0.307058	0.436818	0.342025	0.301916	0.302735	0.045717	0.271773	0.40914	0.506909	0.510522		0.288812	0.279135	0.258517	0.333657	0.279313	0.33099			169.38	0.255279	0.202318	0.289545	0.213738	0.32889	0.250258	0.255192	0.237269	0.257751	0.254337

## Sheet: SUPP_FIG_3B
	Non-Targeting			siBCKDHA 1			siBCKDHA 2			siBCKDHA 3
Control	1	1	1	0.496049	0.312423	0.458307	0.309999	0.264197	0.320969	0.517729	0.452274	0.584534
Na2HB	1.53213	1.47253	1.3898	0.380587	0.286592	0.366136	0.282423	0.206371	0.218662	0.944216	0.647121	0.858251
	Non-Targeting			siPCCA 1			siPCCA 2			siPCCA 3
Control	1	1	1	0.808855	0.797873	0.845052	0.666437	0.700773	0.638237	0.483302	0.501602	0.477101
Na2HB	1.48647	1.60206	1.65496	0.547335	0.574428	0.518936	0.873191	0.924317	0.884724	0.148322	0.134538	0.143166

## Sheet: SUPP_FIG_3C
KIC (mM)	Bovine Heart		Bovine Muscle				2O3MV (mM)	Bovine Heart		Bovine Muscle				2O3MB (mM)	Bovine Heart			Bovine Muscle
20	0.015238	0.036648	0.035537	0.041885			20	0.01015	0.036648	0.005088	0.031414			20	0.035537	0.120419	0.096304	0.01015	0.078533	0.044342
10	0.025388	0.08377	0.01015	0.062828			10	0.0203	0.068062	0.025388	0.04712			10	0.035537	0.15707	0.089033	0.015238	0.057591	0.036415
5	0.01015	0.026177	0.01015	0.062828			5	0.005088	0.052357	0.005088	0.073299			5	0.035238	0.122828	0.077978	0.012694	0.057591	0.035143
2.5	0.01015	0.026177	0.015238	0.015706			2.5	0.015238	0.015706	0.0203	0.073299			2.5	0.0203	0.136127	0.078214	0.01015	0.073299	0.041725
1.25	0.01015	0.026177	0.015238	0.010471			1.25	0.01015	0.020943	0.01015	0.08377			1.25	0.005088	0.136127	0.070608	0.005088	0.026177	0.015633
0.25	0.01015	0.010471	0.005088	0.031414			0.25	0.015238	0.015706	0.005088	0.036648			0.25	0.005088	0.099476	0.052282	0.005088	0.052357	0.028723
HIC (mM)	Bovine Heart		Bovine Muscle				2H3MV (mM)	Bovine Heart		Bovine Muscle				2H3MB (mM)	Bovine Heart		Bovine Muscle
40	0	0.00774	0.00774	0.00774			40	0.00774	0.00774	0.00774	0.00774			40	0.00774	0.00774	0.00774	0.00774
20	0	0.00774	0	0.00774			20	0	0.00774	0	0.00774			20	0	0.00774	0	0.00774
10	0.00774	0.00774	0.00774	0.00774			10	0.00774	0.00774	0	0.00774			10	0.00774	0.00774	0	0.00774
5	0.00774	0.00774	0	0.00774			5	0	0.00774	0	0.00774			5	0	0.00774	0	0.00774
2.5	0.00774	0.00774	0.00774	0.00774			2.5	0	0.015484	0	0.00774			2.5	0	0.015484	0	0.00774
1	0	0.00774	0.00774	0.015484			1	0.00774	0.00774	0.00774	0.00774			1	0.00774	0.00774	0.00774	0.00774
