# Supplementary material for: A 2-hydroxybutyrate-mediated feedback loop regulates muscular fatigue
Source: eLife. 2024 Sep 3;12:RP92707. doi: 10.7554/eLife.92707 (PMC11371357; doi:10.7554/eLife.92707)
Supplement: Figure 3—source data 1. [file elife-92707-fig3-data1.xlsx]

## Sheet: Fig.3A
	2KB with pyruvate																									Max
Time (min)	5mM NaCl						500 uM NaCl						5 mM Na2KB						500 uM Na2KB								NaCl				Na2KB
1.41	1.26725	1.18232	1.15682	1.12982			1.14818	1.13013	1.10529	1.096			1.24445	1.24445	1.18261	1.2006					1.15684	1.16798	1.1405	1.13812		500	1.88367	2.01717	2.00098	2.16168	2.09978	2.21632	2.07011	2.15966
7.95	1.06353	1.04716	1.05286	1.02844			1	1	1	1			1.04789	1.04789	1.0236	1.04822					1.05069	1.05941	1.03584	1.03233		5000	1.90732	1.92179	1.95745	2.08368	2.06647	2.21592	2.51297	2.1687
14.5	1	1	1	1			0.955896	0.935998	0.947633	0.976157			1	1	1	1					1	1	1	1
23.17	0.989528	0.931158	0.944228	0.95492			0.922708	0.890382	0.924245	0.93689			1.11329	1.11329	1.05989	1.05695					0.982311	0.99578	0.968433	0.970325
31.75	1.01677	0.948811	0.934063	0.957428			0.938371	0.880901	0.937162	0.937244			1.11623	1.11623	1.04247	1.03634					0.9934	0.992684	0.979365	0.967308
40.34	0.949539	0.935389	0.926264	0.947022			0.923734	0.860484	0.925834	0.936907			1.13447	1.13447	1.05316	1.051					0.991041	0.983719	0.97704	0.958572
48.93	0.942496	0.938694	0.928362	0.939885			0.911984	0.846508	0.925344	0.933582			1.14345	1.14345	1.05236	1.0509					0.991291	0.992797	0.977286	0.967418
57.52	0.924568	0.932733	0.930411	0.93849			0.893913	0.839184	0.9118	0.93551			1.09609	1.09609	1.05628	1.05458					0.985505	0.981627	0.971582	0.956533
66.12	0.923978	0.928302	0.928536	0.938103			0.897043	0.849462	0.927664	0.926807			1.11911	1.11911	1.04917	1.06874					0.999247	0.976422	0.98513	0.951462
74.72	0.895723	0.908332	0.915597	0.926138			0.888456	0.847569	0.912485	0.930327			1.10153	1.10153	1.03712	1.06038					0.994402	0.976423	0.980353	0.951462
83.32	0.891204	0.914333	0.921387	0.923853			0.878927	0.857182	0.912851	0.924966			1.10229	1.10229	1.03199	1.06314					0.978032	0.965016	0.964215	0.940347
91.91	0.892608	0.909222	0.912955	0.920041			0.88985	0.852991	0.921243	0.916642			1.10285	1.10285	1.03155	1.06905					0.973546	0.956069	0.959792	0.931629
100.55	0.493486	0.455204	0.439454	0.421052			0.4659	0.369831	0.456987	0.417714			0.482909	0.482909	0.470242	0.4797					0.450075	0.398629	0.443717	0.388439
109.14	0.478906	0.435618	0.425265	0.394457			0.456149	0.369908	0.435268	0.406268			0.476918	0.476918	0.456525	0.453862					0.422014	0.370927	0.416052	0.361445
117.72	0.458104	0.427235	0.404214	0.388399			0.429907	0.365469	0.42844	0.394698			0.477868	0.477868	0.441289	0.451959					0.424299	0.364308	0.418305	0.354995
126.38	1.91517	1.81859	1.89513	1.95004			1.87726	1.8343	1.94766	2.0457			2.0705	2.19455	2.50562	2.21809					2.1201	2.2087	2.09015	2.15224
134.95	1.90732	1.92179	1.95745	2.08368			1.88367	2.01717	2.00098	2.16168			2.06647	2.21592	2.51297	2.1687					2.09978	2.21632	2.07011	2.15966
143.55	1.84703	1.83036	1.8898	2.00675			1.85685	1.92831	1.93329	2.04927			2.03189	2.15408	2.43797	2.1283					1.9964	2.09989	1.96819	2.04621
152.21	0.44751	0.415094	0.411801	0.385879			0.40222	0.348243	0.408187	0.440495			0.466998	0.446948	0.515585	0.434798					0.375588	0.335009	0.370282	0.326445
160.8	0.433778	0.393649	0.395441	0.377492			0.388461	0.333038	0.403855	0.41301			0.443461	0.433132	0.493453	0.418123					0.346569	0.312709	0.341673	0.304716
169.38	0.395488	0.370192	0.385618	0.366614			0.364654	0.314228	0.379176	0.394376			0.405012	0.431929	0.462483	0.404452					0.331205	0.290894	0.326526	0.283457
	2KB without pyruvate																									Max
Time (min)	5mM NaCl						500 uM NaCl						5 mM Na2KB						500 uM Na2KB								NaCl				Na2KB
1.41	1.1406	1.14731	1.14775	1.14396			1.21885	1.14846	1.12734	1.14273			1.19374	1.12939	1.13987	1.12661					1.12545	1.13526	1.09879	1.16063		500	1.37251	1.48179	1.18735	1.14273	1.97168	1.83252	1.74789	1.77489
7.95	1.02938	1.04825	1.04021	1.04138			1.07792	1.03594	1.04796	1.02932			1.04682	1.01844	1.02782	1.00825					1.01414	1.03774	1.02404	1.0453		5000	1.24389	1.30091	1.43778	1.44723	2.32494	2.23855	2.19381	2.41674
14.5	1	1	1	1			1	1	1	1			1	1	1	1					1	1	1	1
23.17	0.960874	0.962863	0.982394	0.961837			0.899326	0.979368	0.984074	0.962044			1.15247	1.14083	1.15532	1.16898					1.02261	1.02717	1.04653	1.0393
31.75	0.953116	0.970762	0.975998	0.965134			0.909556	0.979519	0.986956	0.968218			1.12891	1.12123	1.1353	1.16238					1.03184	1.02652	1.04012	1.02431
40.34	0.943505	0.956395	0.96733	0.95111			0.891171	0.976583	0.988714	0.977895			1.1335	1.13903	1.15515	1.15828					1.0075	1.0223	1.03601	1.02136
48.93	0.932199	0.941667	0.952239	0.938734			0.918399	0.969525	0.950087	0.961621			1.15221	1.13246	1.16152	1.17158					0.970982	1.016	1.03318	0.999334
57.52	0.926715	0.930586	0.945712	0.918101			0.920234	0.961511	0.954101	0.966463			1.15606	1.14542	1.17438	1.14888					0.964427	1.01786	1.02891	1.00297
66.12	0.938908	0.937231	0.94519	0.909305			0.905403	0.957759	0.933929	0.953443			1.16384	1.16741	1.19363	1.16672					0.97402	1.02059	1.02375	0.997636
74.72	0.919925	0.925396	0.928312	0.897953			0.902925	0.955611	0.930877	0.953013			1.1688	1.16265	1.18483	1.16228					0.975928	1.02624	1.02938	1.00061
83.32	0.917197	0.914044	0.915743	0.879529			0.882794	0.945935	0.915336	0.938279			1.16711	1.16605	1.1907	1.15749					0.968233	1.01826	1.02365	0.98848
91.91	0.910718	0.909731	0.919647	0.873837			0.876726	0.940412	0.908607	0.940225			1.17474	1.1679	1.17888	1.16734					0.970126	1.02093	1.0208	0.968117
100.55	0.487083	0.487627	0.506764	0.515297			0.315434	0.431511	0.428413	0.448856			0.518836	0.501983	0.518853	0.477902					0.403267	0.519625	0.453896	0.474538
109.14	0.45573	0.46887	0.489645	0.50246			0.302665	0.429943	0.433096	0.43194			0.507972	0.501949	0.497288	0.463869					0.399179	0.514724	0.441509	0.44313
117.72	0.451746	0.459559	0.48345	0.492341			0.301839	0.432103	0.442261	0.436347			0.502856	0.49246	0.478522	0.460704					0.397114	0.513294	0.443943	0.430734
126.38	1.0488	1.233	1.44682	1.35548			1.32377	1.33924	1.29973	1.14509			2.40975	2.29852	2.16917	2.57032					1.74393	1.65975	1.87866	1.75458
134.95	1.24389	1.30091	1.43778	1.44723			1.37251	1.48179	1.18735	1.14273			2.32494	2.23855	2.19381	2.41674					1.97168	1.83252	1.74789	1.77489
143.55	1.14338	1.15014	1.28237	1.29768			1.17882	1.28248	1.09417	1.04366			2.20875	2.21717	2.18837	2.31041					1.64918	1.58797	1.53719	1.54641
152.21	0.33613	0.326275	0.386516	0.381968			0.153371	0.30931	0.278838	0.293536			0.405952	0.428528	0.418033	0.436744					0.256808	0.374733	0.288783	0.32671
160.8	0.320098	0.332464	0.366051	0.382437			0.14721	0.302623	0.273653	0.284621			0.391288	0.420989	0.406637	0.427319					0.2477	0.363598	0.285277	0.324433
169.38	0.320113	0.324628	0.357834	0.370572			0.14203	0.300912	0.263728	0.267579			0.375777	0.400998	0.397032	0.392889					0.233509	0.351924	0.276155	0.303741

## Sheet: Fig.3B
	With Pyruvate
Time (min)	5mM NaCl						500 uM NaCl						5 mM Na2HB						500 uM Na2HB									NaCl				Na2HB
1.41	1.26725	1.18232	1.15682	1.12982			1.14818	1.13013	1.10529	1.096			1.16299	1.18918	1.1608	1.13701				1.21716	1.12336	1.11953	1.19575				500	1.88367	2.01717	2.00098	2.16168	1.84988	1.98712	2.09812	2.66976
7.95	1.06353	1.04716	1.05286	1.02844			1	1	1	1			1.04726	1.04383	1.03252	1.03337				1.04197	1.03552	1.03725	1.03634				5000	1.90732	1.92179	1.95745	2.08368	2.12139	2.36751	2.35915	2.37412
14.5	1	1	1	1			0.955896	0.935998	0.947633	0.976157			1	1	1	1				1	1	1	1
23.17	0.989528	0.931158	0.944228	0.95492			0.922708	0.890382	0.924245	0.93689			0.967742	1.00145	0.99803	0.997606				0.990363	0.938014	0.970346	0.974826
31.75	1.01677	0.948811	0.934063	0.957428			0.938371	0.880901	0.937162	0.937244			0.980838	0.989032	0.973362	0.964676				0.988228	0.948163	0.963109	1.01012
40.34	0.949539	0.935389	0.926264	0.947022			0.923734	0.860484	0.925834	0.936907			0.978086	1.01187	0.982407	0.969125				0.972434	0.939591	0.961012	1.00614
48.93	0.942496	0.938694	0.928362	0.939885			0.911984	0.846508	0.925344	0.933582			0.967503	1.01218	0.985531	0.968226				0.971492	0.937743	0.948797	0.992216
57.52	0.924568	0.932733	0.930411	0.93849			0.893913	0.839184	0.9118	0.93551			0.963429	1.0065	0.983337	0.966517				0.960954	0.932565	0.940417	0.988558
66.12	0.923978	0.928302	0.928536	0.938103			0.897043	0.849462	0.927664	0.926807			0.96062	1.02659	0.995552	0.970154				0.959949	0.918681	0.929014	0.989869
74.72	0.895723	0.908332	0.915597	0.926138			0.888456	0.847569	0.912485	0.930327			0.963578	1.02483	0.9817	0.968661				0.971459	0.918847	0.929274	1.01692
83.32	0.891204	0.914333	0.921387	0.923853			0.878927	0.857182	0.912851	0.924966			0.959694	1.02606	0.988982	0.96949				0.944605	0.905942	0.915679	1.01266
91.91	0.892608	0.909222	0.912955	0.920041			0.88985	0.852991	0.921243	0.916642			0.957142	1.01807	0.98641	0.965191				0.959019	0.892898	0.907026	1.01174
100.55	0.493486	0.455204	0.439454	0.421052			0.4659	0.369831	0.456987	0.417714			0.44267	0.54133	0.470309	0.427104				0.505045	0.381698	0.436207	0.298347
109.14	0.478906	0.435618	0.425265	0.394457			0.456149	0.369908	0.435268	0.406268			0.443356	0.518207	0.454291	0.409327				0.468734	0.359291	0.423553	0.290462
117.72	0.458104	0.427235	0.404214	0.388399			0.429907	0.365469	0.42844	0.394698			0.44239	0.528852	0.441737	0.401516				0.470064	0.35665	0.420362	0.294912
126.38	1.91517	1.81859	1.89513	1.95004			1.87726	1.8343	1.94766	2.0457			2.35881	1.98028	2.34331	2.35236				1.77245	1.9941	2.07047	2.58705
134.95	1.90732	1.92179	1.95745	2.08368			1.88367	2.01717	2.00098	2.16168			2.37412	2.12139	2.36751	2.35915				1.84988	1.98712	2.09812	2.66976
143.55	1.84703	1.83036	1.8898	2.00675			1.85685	1.92831	1.93329	2.04927			2.26689	2.07324	2.27823	2.24678				1.80479	1.91003	1.99153	2.53615
152.21	0.44751	0.415094	0.411801	0.385879			0.40222	0.348243	0.408187	0.440495			0.36303	0.491902	0.413415	0.354839				0.422278	0.300304	0.401841	0.195528
160.8	0.433778	0.393649	0.395441	0.377492			0.388461	0.333038	0.403855	0.41301			0.352037	0.469474	0.392073	0.342437				0.413043	0.289574	0.39246	0.16837
169.38	0.395488	0.370192	0.385618	0.366614			0.364654	0.314228	0.379176	0.394376			0.332167	0.42844	0.366773	0.339084				0.38018	0.277036	0.37512	0.141528
	With Pyruvate																											NaCl				Na2HB
Time (min)	5mM NaCl						500 uM NaCl						5 mM Na2HB						500 uM Na2HB								500	1.37251	1.48179	1.18735	1.14273	1.50863	1.17177	1.31958	1.45586
1.41	1.1406	1.14731	1.14775	1.14396			1.21885	1.14846	1.12734	1.14273			1.1525	1.14585	1.12085	1.16315				1.12723	1.10176	1.09303	1.1209				5000	1.24389	1.30091	1.43778	1.44723	1.63021	1.57885	1.84491	1.8738
7.95	1.02938	1.04825	1.04021	1.04138			1.07792	1.03594	1.04796	1.02932			1.02861	1.03238	1.02588	1.02825				1.02744	1.02751	1.02704	1.03521
14.5	1	1	1	1			1	1	1	1			1	1	1	1				1	1	1	1
23.17	0.960874	0.962863	0.982394	0.961837			0.899326	0.979368	0.984074	0.962044			1.00059	0.994778	1.00262	0.985741				0.97933	0.974191	0.986335	0.962271
31.75	0.953116	0.970762	0.975998	0.965134			0.909556	0.979519	0.986956	0.968218			0.983816	0.989414	0.996412	0.985391				0.981896	0.975968	0.983679	0.982261
40.34	0.943505	0.956395	0.96733	0.95111			0.891171	0.976583	0.988714	0.977895			1.00049	1.0046	1.01624	0.992393				0.972717	0.978848	0.993352	0.972684
48.93	0.932199	0.941667	0.952239	0.938734			0.918399	0.969525	0.950087	0.961621			0.985618	1.00054	1.01157	0.981123				0.972587	0.968073	0.981667	0.962975
57.52	0.926715	0.930586	0.945712	0.918101			0.920234	0.961511	0.954101	0.966463			0.989144	0.999957	1.00946	0.970392				0.960277	0.96193	0.983116	0.953842
66.12	0.938908	0.937231	0.94519	0.909305			0.905403	0.957759	0.933929	0.953443			0.98259	1.00345	1.01094	0.954224				0.954069	0.958415	0.970156	0.960079
74.72	0.919925	0.925396	0.928312	0.897953			0.902925	0.955611	0.930877	0.953013			0.977045	0.980396	1.00156	0.952011				0.95512	0.95842	0.979002	0.956387
83.32	0.917197	0.914044	0.915743	0.879529			0.882794	0.945935	0.915336	0.938279			0.972467	0.98522	0.997275	0.91994				0.937457	0.945249	0.968783	0.936929
91.91	0.910718	0.909731	0.919647	0.873837			0.876726	0.940412	0.908607	0.940225			0.971517	0.971314	0.980655	0.924491				0.936264	0.950512	0.964821	0.930196
100.55	0.487083	0.487627	0.506764	0.515297			0.315434	0.431511	0.428413	0.448856			0.513238	0.526707	0.476851	0.486578				0.437973	0.455711	0.443916	0.423228
109.14	0.45573	0.46887	0.489645	0.50246			0.302665	0.429943	0.433096	0.43194			0.491735	0.503307	0.464402	0.457857				0.430707	0.442885	0.429695	0.402526
117.72	0.451746	0.459559	0.48345	0.492341			0.301839	0.432103	0.442261	0.436347			0.488473	0.51211	0.458974	0.462909				0.430506	0.436159	0.427429	0.414767
126.38	1.0488	1.233	1.44682	1.35548			1.32377	1.33924	1.29973	1.14509			1.5568	1.56052	1.94277	1.6936				1.34236	1.1701	1.33832	1.40337
134.95	1.24389	1.30091	1.43778	1.44723			1.37251	1.48179	1.18735	1.14273			1.63021	1.57885	1.84491	1.8738				1.50863	1.17177	1.31958	1.45586
143.55	1.14338	1.15014	1.28237	1.29768			1.17882	1.28248	1.09417	1.04366			1.42566	1.41028	1.62792	1.6091				1.33773	1.05594	1.18973	1.29597
152.21	0.33613	0.326275	0.386516	0.381968			0.153371	0.30931	0.278838	0.293536			0.342831	0.37497	0.33921	0.342143				0.297414	0.311976	0.279016	0.263192
160.8	0.320098	0.332464	0.366051	0.382437			0.14721	0.302623	0.273653	0.284621			0.334798	0.375813	0.323248	0.342829				0.294107	0.295987	0.277355	0.261042
169.38	0.320113	0.324628	0.357834	0.370572			0.14203	0.300912	0.263728	0.267579			0.324556	0.354829	0.321963	0.336714				0.277611	0.289386	0.274423	0.264402

## Sheet: Fig.3C
	NaCl				Na2KB
non-targeting	1.08368	1.0737	1.19737	1.12889	1.97784	2.07229	1.73545	1.46267
HPRT	1.31915	1.21001	1.3855	1.06178	1.75637	1.71074	2.06451	1.4352
BCKDHA	1.26264	1.21398	1.34908	1.06004	1.45928	2.1277	1.98486	1.69285
PCCA	1.40625	1.42139	1.37862	1.2285	1.46603	1.09198	1.24239	1.00206

## Sheet: Fig.3D
Pyruvate (mM)	Bovine Heart						Bovine Muscle
10	0.685279	0.429321	0.788214	0.570423	0.302158	0.707956	0.137061	0.204189	0.799986	0.661972	0.834532	0.345344
5	0.436544	0.581153	1	0.415493	1		0.076136	0.198952	0.570578	0.408451	0.844125
2.5	0.360408	0.408378	0.699996	0.443662	0.484412		0.106612	0.230366	0.629401	0.760563	0.561151
1	0.233497	0.460735	0.658831	0.570423	0.676259	0.282031	0.106612	0.141361	0.476474	0.830986	0.158273	0.408657
0.25	0.01015	0.059162			0.215827		0.030449	0.032984			0.115108
2KB (mM)	Bovine Heart					Bovine Muscle
10	0.817252	0.602096	0.564692	0.422535	0.239808	0.959401	0.732986	0.641173		0.503597
5	0.923864	0.675392	0.952913	0.964789	0.604317	1	0.659687	0.364713	0.84507	0.776978
2.5	0.934013	1	0.547034	1	0.796163	0.680191	0.581153	0.294118	0.56338	0.70024
1	0.725878	0.591625	0.629401		0.565947	0.456844	0.371727	0.14119	0.478873	0.460432
0.5			0.541183		0.35012			0.047052	0.288732	0.258993
0.25	0.218285	0.230366		0.246479	0.172662	0.106612	0.115184		0.176056	0.172662
Lactate (mM)	Bovine Heart					Bovine Muscle
40	0.880953	0.576923	0.81579	0.680982	1	1	1	1	1	0.816
20	0.761903		0.763158	0.276074	0.8	0.595237		0.754388	0.625767	0.592
10	0.563491		0.55263	0.411043	0.56	0.47619		0.55263	0.417178	0.496
5	0.444444	0.442308	0.508772	0.263804	0.32	0.261905	0.317308	0.412282	0.220859	0.368
2.5	0.269839		0.333332	0.214724	0.224	0.285713		0.298244	0.104294	0.2
1	0.13492		0.157896	0.190184	0.192	0.119047		0.09649	0.104294	0.136
2HB (mM)	Bovine Heart						Bovine Muscle
40	0.272775	0.355769	0.307018	0.122699	0.208		0.112318	0.105769	0.122808	0.09816	0.096
20	0.202172		0.201754	0.092025	0.184		0.089855		0.078946	0.07362	0.048
10	0.134784		0.114034	0.055215	0.08		0.051347		0.052632	0.042945	0.024
5	0.080227	0.115385	0.070176	0.02454	0.04		0.023808	0.038462	0.026314	0.018405	0.016
2.5	0.035301		0.035088	0.018405	0.016		0.015873		0.017544	0.01227	0.008
1	0.012835		0.00877	0.018405	0.024		0.007935		0.00877	0.006135	0.032

## Sheet: Fig.3F
	NaCl																			Na2HB
BCAT2	0.691008	-0.75043	-0.52855	1.45387	0.047131	-1.33648	-1.1102	-0.35989	0.836726	-1.3436	-1.22171	-0.204859	-0.137588	-0.858857	-0.828561	-1.33089	0.336874	0.152001	-1.24913	2.10333	1.8212	1.06758	-0.46234	0.123404	0.709534	-1.18124	0.514136	0.595311	0.619135	-0.36672	-0.0318018	1.70627
BCKDHA	-0.3635	0.587014	-1.39627	-0.75978	-1.05382	-1.34755	-2.80726	-0.15932	0.625375	-1.40541	-1.16285	-1.03144	-0.177317	-1.02939	-0.970561	-1.712	0.590886	0.5715	-0.21356	1.6357	1.02121	-0.00178	-0.74423	0.591198	1.17241	0.15192	0.652556	0.752889	0.537439	-0.552727	-0.0161212	1.46979
PCCA	0.704262	-2.85321	-0.98747	0.224819	-0.07447	0.22136	0.565817	-0.03506				-0.250183	-0.134015	-0.739943	-0.631219	-0.542065	1.37586	-0.68875	-0.75928	1.13427	1.20687	-0.5033	-0.00708	0.732	1.57773	0.72654				-0.0915218	-0.270238	1.61759
SLC7A5	0.257667	-0.96512			0.004856	-0.98229	-0.96004	-0.96004										-0.46995	-1.11098	1.59484	1.3417				1.3982	1.3982
LDHA	-0.30484	-0.87445			0.423114	0.545821	-1.18643	-1.30315	0.709905	-1.52366	0.020573	0.299491	-0.69333	-1.06723					0.048949	0.191172	0.605082				-0.03696	-1.7045	0.607338		-0.30388	-0.36027	0.980353	0.095641
LDHB	-0.31369	-0.27961	-1.5903	0.08844	-0.8372	0.225104	0.662993	-1.30136										-0.05929	-0.2418	0.061448	1.83552	-0.73074	0.966459	-0.53349	2.20937	-0.07245
