# Supplementary material for: A 2-hydroxybutyrate-mediated feedback loop regulates muscular fatigue
Source: eLife. 2024 Sep 3;12:RP92707. doi: 10.7554/eLife.92707 (PMC11371357; doi:10.7554/eLife.92707)
Supplement: Figure 4—figure supplement 1—source data 1. [file elife-92707-fig4-figsupp1-data1.xlsx]

## Sheet: SUPP_FIG_4A
Conc (μM)	Na2HB			AOA
10000	0.777778	0.913279	0.869803	0.100271	0.102981	0.102062
5000	1	0.883469	0.956268
2500	0.875339	0.788618	0.821163
1000	0.856369	0.913279	0.876699	0.384824	0.411924	0.395481
500	0.804878	0.834688	0.820312
250	0.842818	0.867209	0.85718
50	0.886179	0.886179	0.886179	0.804878	0.886179	0.845528
0	0.948509	0.848238	0.909079	0.948509	0.848238	0.909079

## Sheet: SUPP_FIG_4B
HPRT	SIRT4 1	SIRT4 2	SIRT4 3
1.48716	0.945568	0.487332	0.500806
1.41076	0.733304	0.420629	0.483114
1.36216	0.594964	0.458805	0.3765
