# Supplementary material for: A 2-hydroxybutyrate-mediated feedback loop regulates muscular fatigue
Source: eLife. 2024 Sep 3;12:RP92707. doi: 10.7554/eLife.92707 (PMC11371357; doi:10.7554/eLife.92707)
Supplement: Figure 4—source data 1. [file elife-92707-fig4-data1.xlsx]

## Sheet: Fig.4A
aKG (mM)	5 mM							500 uM							50 uM							0 uM
5
2.5	0.875	0.35	0.708333	0.5	0.678571			1	0.55	0.923095	0.692302	0.875	0.642857	0.571429	1.125	0.8	1	0.615397	0.916667	0.821429	0.785715	1	0.9	0.958333		1.11111	1	1
1	0.6875	0.35		0.5	0.607143				0.55	1			0.464286	0.607143		0.95	1			0.704365	0.678572		1.1	0.875	1.125	1	0.944444	0.75
0.5	0.5	0.45		0.5	0.535714			0.625	0.75				0.607143	0.678571	0.708333	1.1				0.720238	0.696429	0.625	1			0.666667	0.833333	0.714286
0.25	0.458333	0.35		0.464286	0.428571			0.75	0.45				0.535714	0.571429	0.625	0.8				0.684524	0.571429	0.5	0.6			0.777778	0.833333	0.571429
0.05	0.333333			0.3				0.291667					0.3		0.333333					0.3		0.291667					0.3

## Sheet: Fig.4B
C2C12 acute		C2C12 o/n		MEF acute		MEF o/n
NaCl	Na2HB	NaCl	Na2HB	NaCl	Na2HB	NaCl	Na2HB
5.58623	6.96135	6.40087	6.1738	5.04886	6.31322	5.95605	5.21368
5.6609	6.33546	5.6609	5.46976	4.74161	5.39125	5.64161	5.24556
5.31271	6.24941	5.58623	5.34508	4.69883	5.94148	5.18633	4.60085
6.40087	7.62637	5.31271	4.97029	5.48677	5.90104	4.94883	4.26427
5.34508	6.56303	5.76597	5.90988	4.60085	6.0422	5.44818	4.74092
6.1738	7.58402	6.47762	5.94404	5.21368	6.70916	6.02536	5.41204
4.97029	6.01741	6.34062	6.21992	4.26427	5.46595	6.01873	5.06359
5.46976	6.23587	7.01926	6.62136	4.74556	5.51313	6.33191	5.63819
5.9154	7.55403	5.02079	4.58956	5.3834	6.53872	5.32351	4.62384
6.52843	8.03772	6.0094	6.11898	5.99648	6.44986	5.94607	5.74084
5.69473	6.64592	5.19302	4.87031	5.01885	5.69344	5.22681	4.95701
5.67644	6.76301	6.42038	6.30018	5.15445	5.82972	6.07003	5.66055

## Sheet: Fig.4C
	VECTOR												BCAT2 OE
CL	5.37928	5.90403	5.66092	5.65251	5.5462	6.35209	6.57448	5.49113	5.60822	5.54611	6.06785	5.37491	6.61109	5.91514	6.38534	5.0386	6.17997	6.81914	6.50943	7.51754	6.34413	6.07445	5.89833	7.00905
2HB	5.57528	6.41196	6.14421	5.91936	6.63466	6.66764	7.1166	6.51484	5.82412	6.18037	6.59171	6.33302	6.46731	5.5839	6.58914	4.4746	6.38438	6.80645	6.41587	6.42248	5.83555	7.13951	5.96877	7.62167
AOA			6.1735	6.21862			7.62843	7.6388			7.56	6.95465			7.14025	5.23805			6.22625	6.71375			6.08989	6.38958

## Sheet: Fig.4D
	NT CL				SIRT4 siRNA CL				NT HB				SIRT4 siRNA HB							NT CL				SIRT4 siRNA CL				NT HB				SIRT4 siRNA HB
SLC7A5	-0.04067	-0.09567	-0.06817	-0.069546	0.089393	-0.59314	-0.251874	-0.248071	1.5616	1.30446	1.43303	1.41502	-1.18945	-1.03652	-1.11298	-1.11577			SLC7A5	0.087404	0.46046	-0.25906	0.351838	0.286346	0.457233	0.337315	0.523282	0.930608	0.819557	0.040413	1.68101	-0.66505	-2.16969	-1.09169	-1.78999
BCKDHA	0.441019	-0.06858	0.18622	0.18856	0.172817	-0.18598	-0.006581	-0.006515	1.17429	1.20388	1.18908	1.20403	-1.65267	-1.08478	-1.36872	-1.33758			BCKDHA	0.404286	-0.15966	0.331747	0.250535	-0.85521	-0.53948	-0.73203	-0.51769	1.30026	1.00707	0.972549	2.34004	-0.9962	-0.88467	-1.13997	-0.78158
BCKDHB	0.421948	-1.0481	-0.313076	-0.313076	0.406419	0.320672	0.363546	0.358057	0.590877	1.55445	1.07266	1.09432	-1.41221	-0.83405	-1.12313	-1.10617			BCKDHB	0.017301	0.347987	-0.08322	0.313041	0.164749	0.3477	0.267004	0.165496	0.537859	0.420874	0.27615	2.42302	-0.09343	-1.56952	-0.71905	-2.26365
LDHB	0.583751	-2.02362	-0.719935	-0.714516	-0.14008	-0.26395	-0.202015	-0.205578	1.39217	0.173156	0.782661	0.792496	-0.34444	0.623017	0.139289	0.140337			LDHB	-0.5368	-0.1862	-0.98713	0.04098	-0.73817	-0.30696	-0.61344	-0.3126	0.723351	0.665198	-0.04758	3.36674	-0.26133	-0.25933	-0.27323	-0.27351
LDHA	0.508981	0.180655	0.344818	0.344818	0.696197	0.33175	0.513974	0.517842	0.875045	0.556968	0.716007	0.716007	-1.77185	-1.37775	-1.5748	-1.55103			LDHA	-0.32083	-0.34718	-0.71171	-0.21501	-0.16419	0.178769	-0.08483	-0.07959	0.76565	1.27778	0.050609	2.73119	0.149698	-1.78477	-1.05276	-0.39284
PCCA	-0.82134	-0.40875	-0.615045	-0.610416	0.430767	0.761409	0.596088	0.580986	1.11472	1.10456	1.10964	1.11242	-1.61565	-0.56572	-1.09068	-1.10439			PCCA	0.574909	0.575411	0.290177	0.561463	0.565034	0.098055	0.583553	0.539795	0.28563	0.288061	0.759353	0.650435	-1.70845	-2.84319	-0.42726	-0.79297
BCAT2	0.321298	0.121109	0.221204	0.218982	0.207519	0.33752	0.27252	0.278721	0.97296	1.073	1.02298	1.03842	-1.63156	-1.40184	-1.5167	-1.53193			BCAT2	0.18797	-0.05029	-0.03748	0.390123	0.434918	0.719386	0.537054	0.584615	0.557081	0.581606	0.486434	1.39942	-0.5398	-2.62292	-1.27246	-1.35565
SIRT4	0.605375	0.482646	0.544011	0.541282	-0.45415	-0.38514	-0.419645	-0.412244	1.28178	0.947462	1.11462	1.09496	-1.70544	-0.77253	-1.23899	-1.25769			SIRT4	-0.18553	0.153114	-0.29235	0.004712	-0.53806	-0.52674	-0.48552	-0.48923	1.10104	1.20892	0.436753	2.52477	-0.18376	-2.04989	-0.57345	-0.1048

## Sheet: Fig.4E
CYTOPLASMIC
	NaCl			Na2HB
NT	92851.8	102004	110500	139808	152000	129690
SIRT4	70553.4	64037.8	85308.2	89811.8	63252.2	77884.6
NUCLEAR
	NaCl			Na2HB
NT	595234	517094	571154	382237	340000	395367
SIRT4	744018	627565	611950	637044	641255	596588

## Sheet: Fig.4F
C2C12 ADPr IP blot for CEBPb
	NaCl			Na2HB
NT	41172.9	35328.9	36082.4	27355.3	29700	31637.7
SIRT4	66377.1	62663.3	67141.5	68439.1	61709.8	63477.7
C2C12 CEBPb IP blot for ADPr
	NaCl			Na2HB
NT	43948.6	33675.2	38258.2	29300	23900	27652.8
SIRT4	80171.8	66349.4	64730.8	51537	69835.3	53624.6

## Sheet: Fig.4G
	NaCl			Na2HB
IgG Control	9.52277e-09	9.57e-06	0.000286	2.13e-08	2.19e-05	7.49e-07
CEBPβ IP	2.95724e-08	5.85e-05	1.21e-07	0.013439	0.052727	0.075138

## Sheet: Fig.4H
	NaCl			Na2HB
IgG Control	0.004103	0.001553	0.000943	2.37e-05	2.37e-05	2.37e-05
CEBPβ IP	0.011342	0.006671	0.012503	0.04142	0.034748	0.0455
