# Supplementary material for: A 2-hydroxybutyrate-mediated feedback loop regulates muscular fatigue
Source: eLife. 2024 Sep 3;12:RP92707. doi: 10.7554/eLife.92707 (PMC11371357; doi:10.7554/eLife.92707)
Supplement: Figure 5—figure supplement 1—source data 1. [file elife-92707-fig5-figsupp1-data1.xlsx]

## Sheet: SUPP_FIG_5A
		Time (min)	NaCl												Na2HB												Na2KB
C2C12		1.41	2.4342	2.09148	2.68362	1.39043	1.13883	1.90995							2.6497	2.6212	2.65115	2.86818	2.34855	2.08467	1.92564	1.98534					2.08497	2.48931	2.73142	2.76954	2.0711	1.84289	1.98993
		9.99	2.46419	2.11725	2.71668	1.40756	1.15286	1.93348							2.68234	2.6535	2.68381	2.90352	2.37748	2.11035	1.94936	2.00979					2.11065	2.51998	2.76507	2.80366	2.09661	1.86559	2.01444
		18.56	2.45271	2.10739	2.70403	1.401	1.14749	1.92447							2.66985	2.64113	2.67131	2.88999	2.36641	2.10052	1.94028	2.00043					2.10082	2.50824	2.75219	2.7906	2.08685	1.8569	2.00506
		27.2	4.74334	2.90738	3.7186	2.18522	1.67531	2.88289							5.9147	5.30141	3.7774	3.8337	3.35058	2.9292	2.89167	3.04514					2.81979	3.60374	3.71556	3.72689	2.94067	2.9739	2.87427
		35.78	5.08642	3.11765	3.84576	2.32047	1.75623	2.91415							6.446	5.95991	3.92844	3.95747	3.56145	3.08975	2.93446	3.08509					3.04888	3.74658	3.97505	3.98287	3.098	3.03909	2.94397
		44.36	5.03249	3.02096	3.80855	2.25669	1.74073	2.93242							6.10936	5.62143	3.8677	3.96149	3.50344	3.03685	2.95997	3.09863					3.00409	3.74022	3.95336	3.92753	3.05709	3.06155	2.95798
		53.01	5.83712	4.65113	6.09942	3.40535	2.74038	4.75547							6.4539	6.29083	6.05163	6.44414	5.50062	4.89562	4.69645	4.85462					4.85083	5.83276	6.17504	6.20104	4.82003	4.55071	4.67725
		61.61	6.05197	5.38019	6.98998	3.63783	3.0154	5.05717							6.69878	6.49068	6.98038	7.48584	6.21848	5.51978	5.0987	5.25676					5.52057	6.5912	7.18795	7.27508	5.45282	4.85548	5.24721
		70.2	6.44527	5.53782	7.10568	3.68158	3.00755	5.04116							7.01586	6.94042	7.0197	7.59437	6.20756	5.48968	5.09344	5.24741					5.50809	6.53983	7.23224	7.33318	5.48385	4.8796	5.26892
		78.84	0.563802	0.484422	0.621571	0.322047	0.263773	0.442377							0.613715	0.607115	0.61405	0.664319	0.543963	0.482844	0.44601	0.459837					0.482914	0.576567	0.632643	0.641472	0.479701	0.426844	0.4609
		87.43	0.431927	0.371115	0.476184	0.246719	0.202076	0.338904							0.470165	0.465109	0.470422	0.508933	0.416729	0.369906	0.341687	0.35228					0.369959	0.441706	0.484666	0.49143	0.367498	0.327005	0.353095
		96.02	0.417387	0.358622	0.460154	0.238414	0.195273	0.327495							0.454337	0.449452	0.454586	0.4918	0.4027	0.357453	0.330184	0.340421					0.357505	0.426837	0.46835	0.474887	0.355126	0.315996	0.341208
		Time (min)	NaCl									Na2HB									Na2KB
MEF		1.41	2.82134	3.22689	3.96725	2.37933	3.56125	2.51372				4.28667	5.67549	5.35598	2.65537	2.47168	3.77713	3.69329			1.87405	5.53123	3.87212	1.784	1.31433	2.73831	6.37818	1.7696
		9.99	2.82107	2.79545	3.9612	2.33709	3.29944	2.5327				3.98261	5.57721	5.39949	2.84772	2.82292	3.83757	3.83761			1.91426	5.38519	3.95725	2.14212	1.87256	3.24972	6.28794	1.96139
		18.56	2.71662	2.57884	4.35137	2.34056	3.03854	2.53847				3.95608	5.30923	5.33642	2.89314	2.49189	3.86913	3.9138			1.99612	5.60799	3.91839	2.32771	1.90135	3.31353	6.47427	1.81556
		27.2	5.30557	6.0835	10.4044	4.97411	4.74905	4.33156				8.31442	9.79251	11.1469	10.351	6.98026	7.63199	6.02501			8.18774	12.2303	9.18916	7.55156	9.78915	9.24647	9.39013	4.16388
		35.78	5.79447	6.86666	9.4683	5.09949	4.87043	4.12587				9.32307	11.1699	12.3939	9.29831	7.30421	7.98428	5.92335			7.4875	11.4953	8.6669	7.15338	9.79976	9.21899	9.37708	4.30707
		44.36	6.13521	7.21202	9.60374	5.64401	5.00851	4.21638				9.86445	11.8474	12.9556	9.81253	7.79946	8.58319	6.13701			7.49464	11.7685	8.94406	7.51028	10.5452	9.84293	9.52312	4.66208
		53.01	6.62544	8.16631	10.3578	4.77371	5.32205	4.0891				12.075	14.28	16.4461	9.93481	6.77918	7.80796	6.06417			7.97257	12.0038	9.09087	7.58502	9.61883	8.85847	9.59694	4.13202
		61.61	7.01059	8.69628	10.1784	5.29688	5.92136	4.36203				12.0785	14.6398	16.3739	10.1257	7.26969	8.28829	6.23784			8.02479	12.098	9.19219	7.45067	10.4583	9.48565	9.71853	4.46466
		70.2	7.07141	8.7308	10.2855	6.14942	6.03362	4.63706				11.7997	14.4491	16.0482	10.5605	7.91982	9.082	6.58519			8.3592	12.3125	9.62736	7.94334	11.0903	10.2447	9.9726	4.86196
		78.84	0.744538	0.847477	0.648354	0.152833	0.891942	0.908988				1.29598	1.73003	1.68324	0.47434	0.222346	1.24054	1.35038			0.417628	0.776746	0.227899	0.465642	-0.35382	0.297434	1.16905	0.746791
		87.43	0.678104	0.873886	-0.07459	0.0690765	0.718581	0.82405				1.16397	1.49475	1.24293	0.073423	0.137058	1.20395	1.22851			0.053426	0.242673	-0.0574	0.194661	-0.63395	0.009966	1.22338	0.754173
		96.02	0.641162	0.864111	-0.07085	0.105036	0.762921	0.711849				1.10688	1.52474	1.28138	-0.0353005	0.258407	1.26001	1.00982			-0.25663	-0.02602	-0.12244	0.196919	-0.37176	0.141214	1.11952	0.896813

## Sheet: SUPP_FIG_5B
MEF	Time (min)	NaCl				Na2HB
	1.31	19.4625	24.0854	19.8392	23.0153	25.5933	26.7495	25.7259	23.2444
	9.83	18.1678	22.5245	18.521	21.5479	23.9318	25.3831	24.1794	22.0581
	18.34	17.8893	22.0642	18.2263	21.0498	23.4687	25.0583	23.778	21.7857
	26.93	9.12078	10.609	8.53924	9.83909	10.2527	10.8103	9.2707	9.39716
	35.45	10.4544	12.393	10.0076	11.5558	12.5955	13.6412	11.7642	11.5562
	43.97	10.4015	12.1929	10.041	11.411	12.6115	13.8262	12.5462	11.8974
	52.55	38.6127	44.5091	38.6591	42.7293	51.253	57.1806	52.885	48.3203
	61.06	36.296	42.059	35.6301	41.3746	53.0541	54.8692	52.9178	50.8784
	69.58	33.2668	38.5332	33.6974	40.0649	49.7631	50.5604	50.0703	48.9573
	78.17	5.59664	5.55178	5.1535	5.57005	5.77032	6.12802	6.59763	6.05016
	86.69	4.99491	5.39529	4.70251	5.19834	5.51861	6.14059	6.48574	5.94486
	95.21	4.38937	4.95779	4.22928	4.78633	4.94012	5.70655	5.89124	5.41511
C2C12	Time (min)	NaCl				Na2HB
	1.31	11.9607	10.8448	14.001	14.4615	18.7722	14.3422	13.3126	14.2021
	9.83	11.2679	10.176	13.0549	13.468	17.433	13.5306	13.0268	13.4913
	18.34	11.0265	10.0465	12.8802	13.2601	17.1134	13.3059	12.9019	13.3513
	26.93	4.92191	3.05404	5.71783	5.28108	6.62913	5.24929	4.80226	5.91665
	35.45	5.00932	3.27545	5.91121	5.50584	6.94319	5.4559	5.06722	6.19202
	43.97	4.96787	3.15506	5.91285	5.54673	7.03277	5.51348	5.06432	6.26239
	52.55	25.0545	25.0279	28.7754	29.4535	45.2122	36.3246	31.4727	33.207
	61.06	25.7724	25.7714	29.3312	31.924	46.8237	37.0303	32.8388	32.5823
	69.58	23.2039	23.7887	27.3986	29.7372	43.6281	33.5169	29.9973	28.6766
	78.17	4.04199	1.84003	4.29988	4.21142	5.33767	4.03043	3.63229	4.87405
	86.69	3.58709	1.50985	3.9854	3.7151	5.20882	3.94339	3.38839	4.57458
	95.21	3.21694	1.12397	3.66315	3.3562	4.78506	3.62651	2.98588	4.28485
		NaCl				Na2HB
	MEF	38.6127	44.5091	38.6591	42.7293	53.0541	57.1806	52.9178	50.8784
	C2C12	25.7724	25.7714	29.3312	31.924	46.8237	37.0303	32.8388	33.207

## Sheet: SUPP_FIG_5C
MEF		500 uM Na2HB
	H3K27me3	0.938862	1.11828	0.98882	0.982504	1.0148
	H3K4me3	0.922674	1.08329	0.918761	0.961825	0.970146
	H3K9me2	1.00987	0.961737	1.01409	0.893342
	H3K79me3	1.19482	1.09946	0.905374	1.02105	0.964418

## Sheet: SUPP_FIG_5D
C2C12		500 uM Na2HB						5 mM Na2HB
	H3K27me3	1.49678	0.960301	1.04259	1.04417	1.43248	1.17317	1.28037	1.18933
	H3K4me3	1.14635	1.01629	1.07973	1.10058	0.95777	1.60387	1.0964	1.11333
	H3K9me2	0.850936	0.863554	1.35706				1.07864	1.06569
	H3K79me3	0.832994	0.939854	1.2709	0.998261	1.20168	1.07258	1.04383	1.10463

## Sheet: SUPP_FIG_5F
	CV-ATP5A		CIII-UQCRC2		CIV-MTCO1		CII-SDHB		CI-NDUFB8
NaCl	56900	70200	18100	24200	7720	7880	36100	31200	4480	4720
Na2HB	60172.9	53427	14337.2	20704.5	11078.8	5307	32476	34864.4	5387.32	3296.05
DMSO	55450.4	76178.2	18973.8	9936.28	7736.58	6009.09	28387.1	29335.7	4794.92	3300.27
Et2HB	36745.7	47103.8	36504.8	32684.2	18915	10794	18674.1	28289.7	9168.36	3927.6
