# Supplementary material for: A 2-hydroxybutyrate-mediated feedback loop regulates muscular fatigue
Source: eLife. 2024 Sep 3;12:RP92707. doi: 10.7554/eLife.92707 (PMC11371357; doi:10.7554/eLife.92707)
Supplement: Figure 5—source data 1. [file elife-92707-fig5-data1.xlsx]

## Sheet: Fig.5A
Time (min)	NaCl												Na2HB												Max			Basal
1.41	10.2881	9.64936	9.95638	6.06488	6.14853	9.31398							16.5875	16.6154	14.8714	12.3864	9.34345	12.5832							NaCl	Na2HB		NaCl	Na2HB
9.99	9.82152	9.4542	9.42493	5.8809	6.02212	8.88019							15.9223	16.0678	14.1419	11.8726	9.03154	12.0735							11.6305	37.1636		9.57321	15.6703
18.56	9.57321	9.39175	9.27076	5.8044	5.7891	8.74826							15.6703	15.4713	14.0113	11.776	9.00194	11.8979							23.9597	36.8089		9.39175	15.4713
27.2	6.50889	3.97669	6.19306	2.44922	2.69359	3.74284							7.11633	6.86413	6.4042	5.41858	4.11667	5.46492							30.5882	30.0928		9.27076	14.0113
35.78	6.48119	4.02465	6.35403	2.50592	2.37771	3.99218							7.3111	6.96307	6.48208	5.55453	4.33135	5.52933							12.927	26.1136		5.8044	11.776
44.36	6.72195	4.1724	6.45643	2.59748	2.54561	3.92775							7.41159	7.09968	6.70292	5.70333	4.46407	5.64068							13.4497	20.3295		5.7891	9.00194
53.01	11.6305	23.9597	30.5882	12.927	13.4497	20.9292							37.1636	36.8089	30.0928	26.1136	20.3295	28.2171							20.9292	28.2171		8.74826	11.8979
61.61	11.9806	22.4664	28.2835	12.8559	12.2127	19.8577							33.4006	35.2955	28.1386	24.7451	18.2987	25.7681
70.2	12.4871	22.0772	27.6691	12.5453	12.5095	19.7495							33.5188	35.7961	29.7813	25.0945	18.5455	25.6719
78.84	8.13998	3.50705	5.41483	2.0648	2.17203	3.23921							6.2399	6.23402	5.52613	4.97368	3.75628	4.91114
87.43	6.85914	3.43465	5.33633	2.05085	2.13464	3.20673							6.0414	6.11276	5.45492	4.7634	3.66466	4.79746
96.02	6.35204	3.27658	4.93326	2.02597	1.91239	2.91947							5.6861	5.75781	5.01417	4.38662	3.27355	4.47678

## Sheet: Fig.5B
Time (min)	NaCl									Na2HB									Max			Basal
1.41	15.9104	12.5119	11.6445	18.6781	11.5778	12.9682	12.3169	12.1421		18.3089	16.6337	20.037	20.0522	17.8626	15.6846	13.0764	15.8182		NaCl	Na2HB		NaCl	Na2HB
9.99	15.0154	12.0183	13.8144	17.5042	11.6457	12.7197	10.952	11.3206		17.3473	15.3101	17.9443	18.5879	16.0097	14.437	12.9242	14.8777		27.6005	36.2225		14.7074	17.0588
18.56	14.7074	11.9302	13.2493	17.5891	11.5756	12.7688	10.698	11.1902		17.0588	15.0773	17.4004	18.1258	15.5231	14.2938	12.5663	14.6669		20.4805	33.4219		11.9302	15.0773
27.2	6.11827	5.64343	11.3045	10.7399	7.06258	7.69373	9.76311	10.7193		6.74224	3.78574	6.15071	10.4393	9.52808	8.62246	10.9545	5.2192		18.4962	31.0523		14.6669	17.4004
35.78	7.36922	6.64314	11.6353	11.5047	7.59423	8.29696	9.8592	10.8911		8.07427	5.06078	7.53626	11.121	10.2913	8.87581	11.466	6.69609		23.5495	28.1972		13.2493	18.1258
44.36	7.65105	6.67835	11.7777	11.6062	7.49424	8.26375	10.0134	10.9314		8.21522	5.20546	7.15535	10.836	9.89787	8.72175	11.5995	6.76508		13.0297	20.4142		11.5756	15.5231
53.01	27.6005	20.4805	18.4962	23.5495	13.0297	13.5745	15.063	17.1518		36.2225	33.4219	31.0523	28.1972	20.4142	19.9723	20.7625	30.1501		13.5745	19.9723		12.7688	14.2938
61.61	26.4796	19.5457	18.5246	21.9534	13.7682	13.7828	15.6194	16.6298		35.0287	32.1698	29.9914	27.3887	19.9608	19.5495	21.9484	29.6375		15.063	20.7625		10.698	12.5663
70.2	25.4554	19.5108	18.4231	21.973	13.8057	13.843	15.7328	16.7647		33.7173	30.7433	30.0492	26.9466	19.7219	19.5387	22.9287	28.1458		17.1518	30.1501		11.1902	14.6669
78.84	4.19074	3.25975	11.256	5.76721	4.09419	4.44155	9.13077	11.1397		3.37904	-0.484937	3.68747	3.99514	4.98525	3.79068	10.0979	1.7193
87.43	3.81911	2.97371	11.3535	5.30439	3.4971	3.93946	8.81665	11.203		2.67178	-1.09023	3.2009	3.55304	4.65923	3.49505	10.171	1.38104
96.02	3.32079	2.64053	11.4743	4.9902	3.34943	3.75835	9.0128	11.2489		2.22151	-1.60562	2.49651	3.32653	4.55765	3.32266	10.4736	1.08647

## Sheet: Fig.5C
Time (min)	NT CL				NT HB				siBCKDHA CL				siBCKDHA HB				siSIRT4 CL				siSIRT4 HB					Max	NaCl				Na2HB
1.31	4.74908	6.27204	6.50099	5.63344	8.46178	10.0285	10.0768	6.61564	5.27134	6.28381	5.2222	5.76677	4.8772	5.56262	6.09969	6.42262	2.55813	3.09536	3.1149	3.68291	2.93077	3.25654	4.00499	3.5488		NT	5.85058	7.37886	7.67183	6.66641	12.1341	15.5866	14.5699	9.94929
7.77	4.43225	5.79379	5.94153	5.30413	7.68848	9.02414	9.18825	6.22524	4.86258	5.76157	4.78343	5.3918	4.50474	5.10044	5.50118	6.03277	2.34997	2.76534	2.72609	3.41982	2.66201	2.96249	3.62907	3.34928		siBCKDHA	5.19088	6.88166	6.70188	7.84396	5.75474	7.99624	8.87217	10.1711
14.23	4.13889	5.4227	5.69191	5.06122	7.14855	8.39274	8.59685	5.89296	4.65952	5.49784	4.59412	5.16877	4.28289	4.85786	5.20307	5.75	2.21495	2.56908	2.57413	3.30043	2.50787	2.793	3.43456	3.19117		siSIRT4	2.21106	3.57637	4.50789	3.95383	2.80036	3.66893	5.13005	4.25485
20.79	0.974614	1.13096	1.27606	1.12011	1.63133	1.73985	1.82212	1.19325	2.15192	2.36056	1.8884	2.36332	2.06961	2.02101	2.19317	2.53482	1.1546	1.33182	1.14575	1.61637	1.33181	1.42708	1.69134	1.61851
27.25	0.972598	1.17525	1.38098	1.12185	1.66158	1.79588	1.8875	1.25025	2.20033	2.41872	1.94353	2.40992	2.08562	2.04731	2.35846	2.60974	1.21821	1.27658	1.23132	1.79404	1.3781	1.4049	1.80093	1.73491
33.72	0.944241	1.1935	1.34356	1.17222	1.69498	1.84723	1.95278	1.29346	2.23174	2.49347	1.98912	2.4504	2.09164	2.04885	2.30949	2.60745	1.26989	1.35025	1.20191	1.77166	1.38007	1.4819	1.79934	1.76068		Basal	NaCl				Na2HB
40.26	6.0795	7.90147	7.96859	7.24746	13.3698	16.9636	15.7454	10.7618	7.01769	8.70027	8.30293	9.6642	6.801	9.60934	10.2555	12.0848	3.17316	4.41871	4.97617	4.87595	3.78854	4.73258	6.23726	5.18655		NT	4.13889	5.4227	5.69191	5.06122	7.14855	8.39274	8.59685	5.89296
46.73	6.25329	7.58048	8.20849	7.36863	12.1018	15.4957	15.7528	10.1785	5.80675	7.94626	7.62609	9.21838	7.08502	8.74148	10.1322	10.9681	2.80268	3.86927	4.88283	5.03076	3.69055	4.39074	5.97051	5.3622		siBCKDHA	4.65952	5.49784	4.59412	5.16877	4.28289	4.85786	5.20307	5.75
53.19	6.64833	8.20301	8.68271	7.29505	12.2088	15.2959	15.8577	9.91366	5.92595	8.14286	7.79908	9.08167	7.52356	8.94217	10.7059	10.8599	2.95466	4.06325	5.13806	5.06738	3.9549	4.631	6.36132	5.43831		siSIRT4	2.21495	2.56908	2.57413	3.30043	2.50787	2.793	3.43456	3.19117
59.73	0.979347	0.907993	1.11321	0.763196	1.44877	1.46117	1.4069	0.839847	2.02655	1.92458	1.60105	2.06911	2.0108	1.74612	1.8372	1.96484	1.05856	0.896514	0.718611	1.23052	1.30111	1.1176	1.23126	1.18346
66.2	0.869988	0.853845	1.06654	0.775735	1.23572	1.37707	1.28781	0.812557	1.87673	1.8528	1.6586	1.9569	1.81367	1.65111	1.83716	1.9418	1.00006	0.862091	0.710818	1.25599	1.16115	1.06726	1.23537	1.28849
72.67	0.797751	0.824152	1.01088	0.70222	1.2665	1.37883	1.33553	0.848977	1.82681	1.81861	1.6109	1.82024	1.76882	1.6131	1.8337	1.91368	0.962104	0.842344	0.630172	1.11355	1.15454	1.06365	1.27428	1.21643

## Sheet: Fig.5D
Time (min)	NT CL				NT HB				siBCKDHA CL				siBCKDHA HB				siSIRT4 CL				siSIRT4 HB						Basal	NaCl				Na2HB
1.31	9.87645	14.982	14.2096	16.5168	16.6225	17.8239	16.4258	16.0332	10.2529	12.3076	12.0972	11.6864	11.7331	12.7591	11.5424	8.35021	5.80014	8.90877	6.39584	6.76835	5.6939	7.30092	6.21092	5.43786			NT	4.13889	5.4227	5.69191	5.06122	7.14855	8.39274	8.59685	5.89296
7.77	9.17494	13.9432	13.2249	15.3467	15.1687	16.3739	15.2499	14.7002	9.17366	11.2138	11.0815	10.6436	10.5027	11.6472	10.6164	7.588	5.15299	8.03307	5.83863	6.15425	5.3065	6.53573	5.64239	4.91235			siBCKDHA	4.65952	5.49784	4.59412	5.16877	4.28289	4.85786	5.20307	5.75
14.23	8.88826	13.5643	12.8561	14.8949	14.6394	15.8427	14.8392	14.211	8.84803	10.7751	10.6442	10.2626	10.0709	11.2443	10.2919	7.33254	4.92958	7.75383	5.62136	5.84989	5.05212	6.28474	5.53114	4.76647			siSIRT4	2.21495	2.56908	2.57413	3.30043	2.50787	2.793	3.43456	3.19117
20.79	4.51929	6.03463	5.85304	6.62281	6.54935	7.35036	6.63674	6.46113	4.44119	5.37915	5.44976	4.9908	5.08913	5.5042	5.15314	3.88563	2.82881	4.16297	3.05824	3.16758	2.98266	3.32998	2.99648	2.59754
27.25	5.06002	7.57007	7.18776	8.13048	8.11608	9.0243	8.12132	7.81579	5.20546	6.22059	6.06966	5.95871	5.91583	6.60892	6.10782	4.50092	3.26684	4.93608	3.69942	3.73034	3.31025	4.00452	3.58849	3.00951
33.72	5.34257	7.99477	7.55406	8.5621	8.56956	9.48131	8.5516	8.15975	5.50549	6.46684	6.24663	6.18888	6.07999	6.93534	6.35429	4.64681	3.35386	5.07662	3.7864	3.82994	3.46925	4.10766	3.6949	3.10859			Max	NaCl				Na2HB
40.26	10.249	18.1158	17.7755	19.4891	23.4103	24.8139	21.4476	21.3743	9.49872	12.9915	13.7672	12.004	12.6014	14.6805	13.0905	9.35341	4.87184	8.34464	5.38608	6.82016	5.23652	6.28449	5.03798	5.35554			NT	11.3446	18.2073	16.1777	17.2587	19.9357	21.1595	18.9303	19.3485
46.73	10.3141	17.1291	18.2038	20.528	21.1491	22.7606	22.197	22.1959	8.90259	13.1567	14.0803	12.4144	12.0095	14.2337	12.9251	7.94472	4.80732	8.36254	5.64468	6.5805	5.06262	6.1465	5.06061	5.42062			siBCKDHA	7.9634	10.5218	11.1319	10.4357	9.95961	12.0542	10.614	7.43597
53.19	11.3446	18.2073	19.0117	20.7712	21.0288	22.0701	21.93	22.4479	9.25715	13.1646	14.0847	12.7591	12.3955	14.2016	12.8772	8.65754	4.96977	8.50614	5.72548	6.78475	5.32198	6.07597	4.94326	5.47288			siSIRT4	4.35164	7.01647	4.98023	5.2685	4.03409	5.84263	4.69568	4.14516
59.73	3.53874	4.00529	3.35999	4.3341	4.29264	4.19377	3.57799	3.51272	3.07974	3.30173	3.54053	2.70495	3.56535	2.99956	2.89563	2.45512	1.93446	2.37809	1.77738	1.70607	2.25661	1.93751	1.80664	1.62588
66.2	2.66186	3.30838	3.00761	3.80721	3.83682	4.05077	3.45719	3.37226	2.59067	2.91481	3.16979	2.51529	2.92164	2.79174	2.69015	2.1089	1.58702	2.0414	1.53066	1.67111	1.74523	1.61344	1.65853	1.42942
72.67	2.43493	2.90172	2.83398	3.51245	3.47461	3.65445	3.26665	3.09943	2.28953	2.6428	2.95274	2.32342	2.64177	2.62634	2.47659	1.91744	1.44851	1.8923	1.41562	1.55166	1.65982	1.45829	1.51524	1.32773
