# Supplementary material for: A 2-hydroxybutyrate-mediated feedback loop regulates muscular fatigue
Source: eLife. 2024 Sep 3;12:RP92707. doi: 10.7554/eLife.92707 (PMC11371357; doi:10.7554/eLife.92707)
Supplement: Figure 6—figure supplement 1—source data 1. [file elife-92707-fig6-figsupp1-data1.xlsx]

## Sheet: SUPP_FIG_6B
	Complex I	Complex II	Complex III	Complex IV	Complex V
	0.853288	0.88198	0.817153	0.818242	0.965038
	0.991465	0.922613	1.02681	0.80367	0.982326
	0.861414	0.833583	0.829544	0.760775	0.915177
	0.913645	1.00877	1.02263	0.954255	1.0032
	0.800899	1.07406	1.26191	1.32811	1.11991
	0.970016	1.16188	1.35764	1.48081	1.20349

## Sheet: SUPP_FIG_6C
	H3K4me3	H3K27me3	H3K79me3
	0.884486	0.69554	0.877494
	1.1904	0.975895	0.973328
	1.25529	0.757407	0.753139
	0.651173	1.0169	0.813205
	0.749016	1.06167	1.0286
	0.377869	0.823915	1.0102
