# Supplementary material for: A 2-hydroxybutyrate-mediated feedback loop regulates muscular fatigue
Source: eLife. 2024 Sep 3;12:RP92707. doi: 10.7554/eLife.92707 (PMC11371357; doi:10.7554/eLife.92707)
Supplement: Figure 6—source data 1. [file elife-92707-fig6-data1.xlsx]

## Sheet: Fig.6A
Cytoplasmic			Nuclear
NaCl	Na2HB		NaCl	Na2HB
3424474	7670000		66570655	152000000
6868076	8021042		88451647	111000000
5629144	8926796		123000000	103000000
2714034	7018162		1.66387e+08	65900000
5272219	5686382		1.52599e+08	47700000
5762347	4736712		1.84355e+08	64200000

## Sheet: Fig.6B
CEBPb IP blot for ADPr
NaCl	Na2HB
1945455	1040579
1323557	889330
1613631	1022344
1255009	1216863
1.23495e+06	1009602
1945455	1113232
ADPr IP blot for CEBPb
NaCl	Na2HB
39976.1	38178.4
48337.4	32814.3
57950.4	31731.5
36900	28800
34900	25100
30500	29300

## Sheet: Fig.6C
	NaCl					Na2HB
PCCA	-0.09456	-0.6941	-2.07363	-0.44563	-0.52068	1.14175	-0.61957	1.1744	0.433882
BCKDHA	-0.36995	-0.58564	0.851856	-1.4358	-1.02828	1.09691	0.692712	0.882182	1.77094
BCAT2	-0.90624	-0.55045	0.397494	-1.46038	0.062788	0.564318	0.268445	0.726077	1.67027

## Sheet: Fig.6D
NaCl	Na2HB
1040146	1144862
875624	1189029
927562	1150292
945287	1010000
1063714	1167632
850469	971107

## Sheet: Fig.6E
Total BCKDHA			PS293 BCKDHA
Control	2HB		Control	2HB
1522897	2148179		1810286	1966567
1900913	2568514		1924034	2071733
2038447	2316186		1899832	1854720
1305369	2616273		2373333	1477565
1130000	2172000		3017143	1670000
1524211	1941636		3036000	1547463

## Sheet: Fig.6F
Total BCKDHA			PS293 BCKDHA
Control	2HB		Control	2HB
2205385	1530000		641558	1281404
2359724	1979697		1610224	1416621
2061037	1749846		1908571	1021736
2145412	2391228		1670000	1714126
1727456	2683768		965747	1254678
1958881	2106897		993971	760000

## Sheet: Fig.6G
Soleus
Frequency (Hz)	NaCl									Na2HB
1	52.5225	60.3603	74.6868	39.7921	58.4601	62.6044	42.226			37.1621	62.9454	26.4507	35.4793	21.8018	56.8362	16.4524	48.4641
10	70.3603	72.072	87.7389	50.7692	70.4519	79.2989	57.4992			40.4654	82.4802	25.6491	47.0487	29.2961	69.9522	22.5138	66.2672
15	110.991	99.9999	117.469	69.2931	98.9324	106.427	70.0771			54.5044	112.144	32.863	71.7299	36.1092	95.3099	29.6035	90.0047
20	169.459	163.063	207.383	113.888	163.388	204.508	159.021			101.421	179.431	60.1152	130.348	66.7679	173.132	61.4799	174.075
30	200.18	199.099	243.638	134.47	191.119	249.374	210.231			136.261	207.648	81.7567	158.886	83.1193	217.016	92.6527	211.66
50	233.874	242.342	272.643	157.11	217.352	282.763	251.559			159.384	225.012	103.398	189.737	103.558	257.949	118.63	242.32
70	249.729	263.964	282.795	168.087	232.341	302.588	273.121			175.075	238.035	121.182	209.019	115.141	276.311	135.948	262.102
100	257.657	281.982	292.221	179.064	242.085	321.565	290.191			184.159	248.887	134.658	222.903	123.998	289.427	150.669	279.905
120	259.639	288.288	293.671	183.867	245.832	327.63	295.582			188.288	252.505	143.475	227.53	129.448	292.925	157.596	286.828
EDL
Frequency (Hz)	NaCl						Na2HB
1	127.895	96.5731	64.2309	74.7361	84.1603		76.6221	93.1917	81.5487	94.95	102.862
20	177.24	123.083	89.3648	113.309	122.5		106.011	122.204	102.862	125.2	166.038
30	240.684	166.636	119.386	146.258	169.08		147.996	155.613	139.003	141.165	239.743
40	283.987	223.444	150.803	170.366	224.427		193.982	189.9	182.558	186.539	277
50	326.283	256.582	174.541	212.958	273.988		233.867	224.188	239.086	218.469	306.968
70	383.685	335.166	241.564	287.694	325.42		305.439	283.971	310.441	280.649	349.085
100	436.051	402.388	298.115	355.85	378.545		370.515	338.645	370.676	335.266	388.772
120	453.171	433.632	324.645	380.762	395.553		397.805	359.579	396.623	352.912	404.161
150	469.283	458.249	342.099	391.511	403.034		415.649	373.646	412.377	360.474	419.397

## Sheet: Fig.6H
Soleus
Number of Stimulations	NaCl									Na2HB
1	246.756	268.468	288.596	165.343	235.198	304.675	281.207			175.075	244.547	121.032	212.105	113.097	278.06	133.351	268.036
10	220.991	242.342	251.751	147.505	206.859	276.503	249.762			157.733	216.33	116.223	192.051	101.387	247.456	125.558	238.364
20	199.189	213.344	230.586	133.098	194.117	260.852	232.692			142.868	208.507	105.001	178.168	91.9762	229.094	116.898	227.484
30	185.129	158.558	201.582	121.434	182.126	252.505	204.841			135.28	201.136	96.9858	150.401	87.0793	215.103	112.569	216.605
40	171.441	118.018	167.365	102.224	161.889	238.744	165.31			124.545	191.007	87.3674	124.949	81.0754	196.741	103.044	201.769
50	154.594	89.1891	138.361	84.3866	134.908	203.464	133.865			111.486	172.783	76.1459	108.752	72.8997	170.672	93.5186	177.042
60	134.589	74.6057	115.882	71.9088	112.283	163.815	113.201			99.099	151.801	68.9321	97.809	66.2144	144.987	83.1277	148.359
70	116.937	65.5967	97.7544	61.7463	92.9365	131.274	95.233			83.2534	130.232	61.7183	87.927	59.2736	119.793	73.6026	122.644
80	104.054	59.4594	86.1527	54.1995	79.4457	109.558	84.4519			73.3436	111.421	57.7106	80.2141	53.8231	103.016	67.5413	104.841
90	95.9401	54.7859	76.137	49.397	69.7024	97.0369	76.3661			66.066	98.3974	54.5044	71.7299	50.2888	90.7738	64.0776	91.7975
100	89.0032	48.6486	68.75	45.9667	62.2075	87.6462	70.9756			61.111	87.5447	52.0998	66.3309	46.3288	84.6532	61.4799	82.0922
EDL
Number of Stimulations	NaCl									Na2HB
1	447.128	415.643	303.7	368.055	392.572					411.45	343.754	376.236	341.148	400.111
10	378.649	373.984	283.454	340.581	322.439					350.572	304.906	336.388	293.095	349.085
20	316.023	320.017	240.866	256.202	261.656					295.992	263.75	281.714	248.561	303.728
30	189.325	212.26	159.879	152.034	162.71					189.981	189.9	193.678	160.491	215.444
40	120.846	141.072	97.0445	94.0228	109.408					109.16	118.688	131.416	99.9916	135.26
50	87.613	103.201	67.1545	61.8783	81.3549					75.5725	87.0375	96.3757	65.5407	95.5731

## Sheet: Fig.6I
	Soleus					EDL
Number of Stimulations	NaCl	Na2HB				Number of Stimulations	NaCl	Na2HB
66.3509	1					27.2976	1
36	1					30.6235	1
47.9531	1					31.2778	1
63.527	1					26.9286	1
51.3746	1					26.6066	1
57.6502	1
47.8571	1
67.2964		1				28.5148		1
74.2308		1				32.5309		1
73		1				30.893		1
51.6584		1				28.8551		1
75		1				31.9192		1
62.3644		1
82.5		1
65.5769		1
